# Supplementary material for: Detoxification and Immune Transcriptomic Response of the Gill Tissue of Bay Scallop (Argopecten irradians) Following Exposure to the Algicide Palmitoleic Acid
Source: Biomolecules. 2018 Nov 6;8(4):139. doi: 10.3390/biom8040139 (PMC6315773; doi:10.3390/biom8040139)
Supplement: Supplementary file 1 [file biomolecules-08-00139-s001.xlsx]

## Sheet: CN-VS-PA.PossionDis_Method.Gene
GeneID	Length	CN-Expression	PA-Expression	log2FoldChange(PA/CN)	Pvalue	FDR	Up/Down-Regulation(PA/CN)	Nr	Nt	Swissprot	KEGG	COG	Interpro	GO
Unigene44066_All	289	0.01	33.16	11.6952	3.19726e-25	6.24823e-24	Up	NA	NA	NA	NA	NA	NA	NA
Unigene31467_All	325	0.01	33.01	11.6887	8.31336e-29	1.83986e-27	Up	NA	NA	NA	NA	NA	NA	NA
Unigene44624_All	1041	0.01	24.82	11.2773	3.32866e-77	2.01147e-75	Up	gi|524907662|ref|XP_005108947.1|/1.85648e-58/PREDICTED: thimet oligopeptidase-like isoform X1 [Aplysia californica]	gi|556982430|ref|XM_005997448.1|/3e-08/PREDICTED: Latimeria chalumnae neurolysin (metallopeptidase M3 family) (NLN), mRNA	sp|Q1JPJ8|THOP1_BOVIN/3e-52/Thimet oligopeptidase OS=Bos taurus GN=THOP1 PE=2 SV=3	spu:594682/8e-57/neurolysin, mitochondrial; K01393 neurolysin [EC:3.4.24.16]	YCL057w/4e-21/---	PTHR11804:SF34/2.6E-79/--	NA
CL1935.Contig1_All	711	0.01	21.01	11.0369	9.60008e-44	3.16545e-42	Up	gi|260816423|ref|XP_002602970.1|/7.10779e-59/hypothetical protein BRAFLDRAFT_287444 [Branchiostoma floridae] &gt;gi|229288285|gb|EEN58982.1| hypothetical protein BRAFLDRAFT_287444 [Branchiostoma floridae]	gi|524901912|ref|XM_005107303.1|/1e-06/PREDICTED: Aplysia californica uracil-DNA glycosylase-like (LOC101848840), transcript variant X2, mRNA	sp|P53766|UNG_DICDI/1e-37/Uracil-DNA glycosylase OS=Dictyostelium discoideum GN=uglA PE=2 SV=2	crg:105346809/3e-54/uracil-DNA glycosylase-like; K03648 uracil-DNA glycosylase [EC:3.2.2.27]	PA0750/9e-37/---	SM00986/6.5E-9/Uracil DNA glycosylase superfamily	biological_process:GO:0008152//metabolic process;GO:0006974//cellular response to DNA damage stimulus;molecular_function:GO:0016798//hydrolase activity, acting on glycosyl bonds;
Unigene36452_All	807	0.01	19.79	10.9506	2.49618e-47	8.89714e-46	Up	NA	gi|255098792|gb|FJ590509.1|/6e-21/Argopecten irradians manganese superoxide dismutase (MnSOD) gene, complete cds	NA	NA	NA	NA	NA
CL3015.Contig1_All	1731	0.01	19.46	10.9263	1.34437e-102	1.08827e-100	Up	NA	NA	NA	NA	NA	NA	NA
CL2074.Contig6_All	1167	0.01	18.58	10.8595	2.96668e-65	1.4997e-63	Up	gi|291239071|ref|XP_002739449.1|/2.39344e-121/PREDICTED: glutathione S-transferase omega-like 2-like [Saccoglossus kowalevskii]	NA	NA	crg:105321344/5e-122/glutathione S-transferase omega-like 2; K07393 putative glutathione S-transferase	ZyqjG/8e-99/---	PS50405/10.695/Soluble glutathione S-transferase C-terminal domain profile.	NA
CL1951.Contig2_All	953	0.01	17.96	10.8106	6.49044e-51	2.54338e-49	Up	gi|556098464|gb|ESO87116.1|/2.49122e-35/hypothetical protein LOTGIDRAFT_229275 [Lottia gigantea]	NA	sp|Q8C3K5|TMM72_MOUSE/2e-08/Transmembrane protein 72 OS=Mus musculus GN=Tmem72 PE=2 SV=1	NA	NA	NA	NA
CL4319.Contig2_All	972	0.01	17.94	10.809	4.1426e-52	1.66112e-50	Up	gi|405963669|gb|EKC29225.1|/8.86814e-28/Zygote arrest protein 1 [Crassostrea gigas]	NA	sp|A6NP61|ZAR1L_HUMAN/1e-17/ZAR1-like protein OS=Homo sapiens GN=ZAR1L PE=2 SV=2	cmk:103177245/2e-17/zar1l; zygote arrest 1-like; K18762 zygote arrest protein 1	NA	NA	NA
CL844.Contig7_All	8760	0.01	17.77	10.7952	0	0	Up	gi|405961963|gb|EKC27690.1|/0/Spectrin beta chain [Crassostrea gigas]	gi|524867756|ref|XM_005090629.1|/3e-99/PREDICTED: Aplysia californica spectrin beta chain-like (LOC101859991), transcript variant X6, mRNA	sp|Q00963|SPTCB_DROME/0.0/Spectrin beta chain OS=Drosophila melanogaster GN=beta-Spec PE=1 SV=2	crg:105340614/0.0/spectrin beta chain-like; K06115 spectrin beta	SPAC15A10.08/7e-69/---	SM00033/2.1E-22/Calponin homology domain	NA
CL30.Contig2_All	1641	0.01	17.59	10.7805	5.85152e-88	4.00106e-86	Up	gi|524868361|ref|XP_005090983.1|/1.59096e-50/PREDICTED: low-density lipoprotein receptor-related protein 4-like [Aplysia californica]	NA	sp|O88572|LRP6_MOUSE/5e-36/Low-density lipoprotein receptor-related protein 6 OS=Mus musculus GN=Lrp6 PE=1 SV=1	crg:105332379/3e-53/deleted in malignant brain tumors 1 protein-like; K13912 deleted in malignant brain tumors 1 protein	NA	PS51120/8.717/LDL-receptor class B (LDLRB) repeat profile.	NA
CL1912.Contig2_All	3907	0.01	15.22	10.5718	7.38766e-184	1.1424e-181	Up	gi|524879751|ref|XP_005096547.1|/0/PREDICTED: melanotransferrin-like [Aplysia californica]	NA	sp|O97490|TRFM_RABIT/8e-112/Melanotransferrin OS=Oryctolagus cuniculus GN=Mfi2 PE=2 SV=1	spu:581063/4e-121/melanotransferrin; K06569 melanoma-associated antigen p97	NA	PS51408/85.688/Transferrin-like domain profile.	NA
CL2234.Contig3_All	1190	0.01	14.97	10.5479	1.329e-53	5.48215e-52	Up	NA	NA	NA	NA	NA	NA	NA
Unigene31374_All	2165	0.01	14.69	10.5206	1.61164e-97	1.21798e-95	Up	gi|405963608|gb|EKC29170.1|/1.05659e-132/Heat shock 70 kDa protein 12B [Crassostrea gigas]	NA	sp|Q8K0U4|HS12A_MOUSE/6e-83/Heat shock 70 kDa protein 12A OS=Mus musculus GN=Hspa12a PE=1 SV=1	aqu:100633272/2e-34/uncharacterized LOC100633272; K10380 ankyrin	CC0010/3e-11/---	PF00012/3.2E-8/Hsp70 protein	NA
CL3542.Contig1_All	1409	0.01	14.55	10.5068	2.88252e-62	1.39071e-60	Up	gi|291238013|ref|XP_002738922.1|/1.39793e-28/PREDICTED: uncharacterized protein C10orf35 homolog [Saccoglossus kowalevskii]	NA	sp|Q9D882|CJ035_MOUSE/3e-12/Uncharacterized protein C10orf35 homolog OS=Mus musculus PE=2 SV=1	NA	NA	PF15378/2.3E-18/Domain of unknown function (DUF4605)	NA
CL437.Contig3_All	6296	0.01	14.13	10.4645	3.58712e-276	9.57221e-274	Up	gi|405963089|gb|EKC28693.1|/1.51504e-114/E3 ubiquitin-protein ligase MIB2 [Crassostrea gigas]	gi|193734887|gb|EU623968.1|/5e-14/Argopecten irradians clone HWDD137 microsatellite sequence	sp|Q68LP1|MIB2_RAT/1e-82/E3 ubiquitin-protein ligase MIB2 OS=Rattus norvegicus GN=Mib2 PE=2 SV=2	crg:105329662/2e-121/E3 ubiquitin-protein ligase MIB1-like; K10645 E3 ubiquitin-protein ligase mind-bomb [EC:2.3.2.27]	RSc1788/9e-12/---	PF00569/9.3E-6/Zinc finger, ZZ type	NA
CL3809.Contig2_All	652	0.01	13.78	10.4284	2.04068e-26	4.17609e-25	Up	NA	NA	NA	NA	NA	NA	NA
Unigene31475_All	1408	0.01	13.72	10.4221	1.10859e-58	5.01554e-57	Up	NA	NA	NA	NA	NA	PF13895/2.5E-5/Immunoglobulin domain	NA
CL2421.Contig1_All	980	0.01	13.48	10.3966	1.46142e-39	4.36313e-38	Up	gi|405962501|gb|EKC28170.1|/1.3528e-07/hypothetical protein CGI_10014338 [Crassostrea gigas]	NA	NA	NA	NA	NA	NA
Unigene43183_All	469	0.01	12.87	10.3298	1.87188e-17	2.62656e-16	Up	NA	NA	NA	fab:101817622/3e-06/SRRM1; serine/arginine repetitive matrix 1; K13171 serine/arginine repetitive matrix protein 1	NA	NA	NA
CL3246.Contig1_All	803	0.01	12.4	10.2761	1.05567e-29	2.39884e-28	Up	gi|405957384|gb|EKC23598.1|/1.71592e-41/Microsomal glutathione S-transferase 2 [Crassostrea gigas]	NA	sp|Q99735|MGST2_HUMAN/3e-29/Microsomal glutathione S-transferase 2 OS=Homo sapiens GN=MGST2 PE=1 SV=1	crg:105330981/4e-42/microsomal glutathione S-transferase 2-like; K00799 glutathione S-transferase [EC:2.5.1.18]	NA	PR00488/5.0E-20/Five-lipoxygenase activating protein signature	NA
CL5188.Contig2_All	1858	0.01	12.38	10.2738	2.4747e-70	1.35308e-68	Up	gi|405957710|gb|EKC23901.1|/1.83072e-114/Protein phosphatase 1 regulatory subunit 7 [Crassostrea gigas]	NA	sp|Q3T0W4|PP1R7_BOVIN/5e-16/Protein phosphatase 1 regulatory subunit 7 OS=Bos taurus GN=PPP1R7 PE=1 SV=1	crg:105322273/1e-124/leucine-rich repeat-containing protein 40-like; K17550 protein phosphatase 1 regulatory subunit 7	CAC3280_2/3e-14/---	PF13855/1.4E-8/Leucine rich repeat	NA
CL2259.Contig1_All	5407	0.01	11.82	10.207	3.3768e-198	5.86882e-196	Up	gi|405969345|gb|EKC34321.1|/0/Ubiquitin-associated protein 2 [Crassostrea gigas]	NA	sp|Q86S05|LIG_DROME/4e-85/Protein lingerer OS=Drosophila melanogaster GN=lig PE=1 SV=1	myd:102770629/2e-28/FLG2; filaggrin family member 2; K10384 filaggrin	XF1267/3e-14/---	PF12478/4.8E-12/Ubiquitin-associated protein 2	NA
Unigene31920_All	250	0.01	11.61	10.1812	6.7964e-08	5.12859e-07	Up	NA	NA	NA	NA	NA	NA	NA
CL1453.Contig1_All	1287	0.01	11.16	10.1241	9.60008e-44	3.16719e-42	Up	NA	NA	NA	NA	NA	NA	NA
CL717.Contig11_All	3273	0.01	11.1	10.1163	3.70268e-112	3.28868e-110	Up	gi|405952298|gb|EKC20127.1|/3.79947e-132/hypothetical protein CGI_10006785 [Crassostrea gigas]	NA	NA	NA	NA	PS50222/9.297/EF-hand calcium-binding domain profile.	NA
Unigene31463_All	1008	0.01	10.87	10.0861	5.46104e-33	1.36601e-31	Up	gi|556101551|gb|ESO90203.1|/1.89579e-12/hypothetical protein LOTGIDRAFT_164518 [Lottia gigantea]	NA	NA	NA	NA	PF05050/4.8E-4/Methyltransferase FkbM domain	NA
CL1248.Contig2_All	2759	0.01	10.67	10.0593	1.19817e-90	8.43166e-89	Up	gi|291228703|ref|XP_002734313.1|/2.88278e-77/PREDICTED: lupus La protein homolog isoform X1 [Saccoglossus kowalevskii] &gt;gi|585657980|ref|XP_006815934.1| PREDICTED: lupus La protein homolog isoform X2 [Saccoglossus kowalevskii]	NA	sp|P05455|LA_HUMAN/9e-68/Lupus La protein OS=Homo sapiens GN=SSB PE=1 SV=2	crg:105345157/6e-105/lupus La protein homolog; K11090 lupus La protein	SPAC57A10.10c/6e-23/---	SM00715/7.7E-35/Domain in the RNA-binding Lupus La protein; unknown function	NA
CL743.Contig2_All	839	0.01	10.66	10.058	1.02572e-26	2.12573e-25	Up	NA	NA	NA	NA	NA	NA	NA
CL717.Contig5_All	3282	0.01	10.42	10.0251	1.38362e-105	1.16216e-103	Up	gi|405952298|gb|EKC20127.1|/3.81158e-132/hypothetical protein CGI_10006785 [Crassostrea gigas]	NA	NA	NA	NA	PS50222/9.297/EF-hand calcium-binding domain profile.	NA
Unigene40275_All	358	0.01	10.34	10.014	1.39165e-10	1.30708e-09	Up	NA	NA	NA	NA	NA	NA	NA
CL3858.Contig2_All	636	0.01	9.99	9.96434	1.19475e-18	1.77865e-17	Up	gi|405970739|gb|EKC35615.1|/4.62036e-45/Dynein light chain 2, cytoplasmic [Crassostrea gigas]	gi|637343065|ref|XM_003225986.2|/2e-38/PREDICTED: Anolis carolinensis dynein, light chain, LC8-type 1 (dynll1), mRNA	sp|Q78P75|DYL2_RAT/5e-45/Dynein light chain 2, cytoplasmic OS=Rattus norvegicus GN=Dynll2 PE=1 SV=1	crg:105323463/3e-45/dynein light chain 2, cytoplasmic; K10418 dynein light chain LC8-type	NA	PTHR11886/3.1E-70/--	NA
CL637.Contig2_All	5386	0.01	9.76	9.93074	3.0357e-163	4.15141e-161	Up	gi|405975706|gb|EKC40255.1|/2.73472e-162/Band 4.1-like protein 3 [Crassostrea gigas]	gi|449495937|ref|XM_002197527.2|/1e-08/PREDICTED: Taeniopygia guttata acyl-CoA binding domain containing 3 (ACBD3), mRNA	sp|O43491|E41L2_HUMAN/6e-118/Band 4.1-like protein 2 OS=Homo sapiens GN=EPB41L2 PE=1 SV=1	nle:100594794/8e-127/EPB41L3; erythrocyte membrane protein band 4.1-like 3; K06107 erythrocyte membrane protein band 4.1	SPAC56F8.03/3e-09/---	SM00295/3.3E-65/Band 4.1 homologues	NA
CL674.Contig2_All	1137	0.01	9.74	9.92778	1.37967e-33	3.50486e-32	Up	gi|405968105|gb|EKC33205.1|/1.73563e-52/Receptor-type tyrosine-protein phosphatase T [Crassostrea gigas]	NA	sp|Q9XWD6|CED1_CAEEL/3e-30/Cell death abnormality protein 1 OS=Caenorhabditis elegans GN=ced-1 PE=1 SV=1	crg:105333895/5e-45/uncharacterized LOC105333895; K18032 receptor-type tyrosine-protein phosphatase A [EC:3.1.3.48]	NA	NA	NA
Unigene39364_All	401	0.01	9.62	9.90989	3.51584e-11	3.455e-10	Up	NA	NA	NA	NA	NA	NA	NA
Unigene44677_All	651	0.01	9.6	9.90689	1.19475e-18	1.77909e-17	Up	NA	NA	NA	NA	NA	NA	NA
CL4816.Contig2_All	1780	0.01	9.58	9.90388	4.1426e-52	1.66001e-50	Up	gi|556116473|gb|ESP05125.1|/0/hypothetical protein LOTGIDRAFT_227818 [Lottia gigantea]	gi|512821253|ref|XM_002934524.2|/9e-16/PREDICTED: Xenopus (Silurana) tropicalis CCR4-NOT transcription complex, subunit 11 (cnot11), transcript variant X1, mRNA	sp|Q9UKZ1|CNO11_HUMAN/2e-165/CCR4-NOT transcription complex subunit 11 OS=Homo sapiens GN=CNOT11 PE=1 SV=1	smm:Smp_172620/4e-50/hypothetical protein; K08740 DNA mismatch repair protein MSH4	NA	PF10155/2.0E-52/Uncharacterized conserved protein (DUF2363)	NA
CL2612.Contig3_All	259	0.01	9.25	9.85331	1.06483e-06	7.1108e-06	Up	NA	NA	NA	NA	NA	NA	NA
CL844.Contig10_All	8869	0.01	9.06	9.82337	3.5156e-250	7.88174e-248	Up	gi|405961963|gb|EKC27690.1|/0/Spectrin beta chain [Crassostrea gigas]	gi|524867756|ref|XM_005090629.1|/3e-99/PREDICTED: Aplysia californica spectrin beta chain-like (LOC101859991), transcript variant X6, mRNA	sp|Q00963|SPTCB_DROME/0.0/Spectrin beta chain OS=Drosophila melanogaster GN=beta-Spec PE=1 SV=2	crg:105340614/0.0/spectrin beta chain-like; K06115 spectrin beta	SPAC15A10.08/7e-69/---	PTHR11915:SF226/0.0/--	NA
Unigene45967_All	555	0.01	8.57	9.74315	3.6185e-14	4.25389e-13	Up	gi|449690440|ref|XP_002156803.2|/1.90099e-13/PREDICTED: uncharacterized protein LOC100213431, partial [Hydra vulgaris]	NA	sp|Q80Z19|MUC2_MOUSE/3e-07/Mucin-2 (Fragments) OS=Mus musculus GN=Muc2 PE=1 SV=2	xtr:100486635/4e-09/cdhr5; cadherin-related family member 5; K16505 cadherin-related family member 5	NA	PS50092/8.468/Thrombospondin type-1 (TSP1) repeat profile.	NA
CL2853.Contig2_All	799	0.01	8.46	9.72451	1.92654e-20	3.11573e-19	Up	NA	NA	NA	NA	NA	NA	NA
CL275.Contig7_All	580	0.01	8.29	9.69523	3.6185e-14	4.25721e-13	Up	gi|295293387|gb|ADF87943.1|/7.81672e-25/C-type lectin 5 [Azumapecten farreri]	NA	sp|P86854|PLCL_MYTGA/3e-16/Perlucin-like protein OS=Mytilus galloprovincialis PE=1 SV=1	xma:102228172/5e-16/neurocan core protein-like; K05695 receptor-type tyrosine-protein phosphatase F [EC:3.1.3.48]; K06491 neural cell adhesion molecule; K06550 L1 cell adhesion molecule; K06756 neuronal cell adhesion molecule; K06778 receptor-type tyrosine-protein phosphatase S [EC:3.1.3.48]; K06794 neurocan core protein	NA	PF05473/1.9E-4/UL45 protein	NA
Unigene36820_All	814	0.01	8.04	9.65105	7.62566e-20	1.20169e-18	Up	NA	NA	NA	NA	NA	NA	NA
CL1808.Contig2_All	801	0.01	8	9.64386	3.0184e-19	4.62484e-18	Up	gi|405966542|gb|EKC31816.1|/8.59537e-09/Putative histone-lysine N-methyltransferase ASH1L [Crassostrea gigas]	NA	NA	crg:105322748/2e-09/uncharacterized LOC105322748; K06101 histone-lysine N-methyltransferase ASH1L [EC:2.1.1.43]	SPAC140.02/2e-07/---	NA	NA
CL517.Contig2_All	920	0.01	7.93	9.63118	6.18056e-22	1.06253e-20	Up	gi|524901846|ref|XP_005107327.1|/2.5106e-21/PREDICTED: uncharacterized protein LOC101861464 [Aplysia californica]	NA	sp|Q54TM7|DRKD_DICDI/2e-09/Probable serine/threonine-protein kinase drkD OS=Dictyostelium discoideum GN=drkD PE=2 SV=1	aqu:100634439/4e-09/tyrosine-protein kinase CSK-like; K05728 c-src tyrosine kinase [EC:2.7.10.2]	CPn0703/3e-09/---	PF00069/7.0E-23/Protein kinase domain	NA
Unigene32072_All	345	0.01	7.85	9.61655	6.7964e-08	5.13309e-07	Up	NA	NA	NA	NA	NA	NA	NA
CL1336.Contig2_All	236	0.01	7.8	9.60733	3.31916e-05	0.000182705	Up	NA	NA	NA	NA	NA	NA	NA
Unigene46611_All	226	0.01	7.69	9.58684	6.60358e-05	0.000346273	Up	NA	NA	NA	NA	NA	NA	NA
CL1726.Contig2_All	351	0.01	7.23	9.49785	2.69016e-07	1.91771e-06	Up	NA	NA	NA	NA	NA	NA	NA
CL5217.Contig2_All	712	0.01	6.99	9.44915	4.59492e-15	5.7148e-14	Up	gi|585704400|ref|XP_006823444.1|/1.17704e-45/PREDICTED: neuroglobin-1-like [Saccoglossus kowalevskii]	NA	sp|Q90YJ2|NGB_DANRE/4e-14/Neuroglobin OS=Danio rerio GN=ngb PE=1 SV=1	NA	NA	PTHR22924/5.4E-39/--	NA
CL3710.Contig4_All	1440	0.02	13.93	9.44398	4.5162e-61	2.12617e-59	Up	gi|115390|sp|P14533.1|CABO_LOLPE/2.54871e-17/RecName: Full=Squidulin; AltName: Full=Optic lobe calcium-binding protein; AltName: Full=SCABP &gt;gi|102715|pir||A33353 calcium-binding protein - squid (Watasenia scintillans)	NA	sp|P14533|CABO_DORPE/4e-19/Squidulin OS=Doryteuthis pealeii PE=1 SV=1	acs:100565534/3e-17/calm3; calmodulin 3 (phosphorylase kinase, delta); K02183 calmodulin	SPAC3A12.14/8e-16/---	PS50222/7.288/EF-hand calcium-binding domain profile.	NA
CL4858.Contig2_All	238	0.01	6.85	9.41996	0.00013138	0.000657805	Up	NA	NA	NA	NA	NA	NA	NA
CL1217.Contig4_All	1083	0.01	6.85	9.41996	1.56145e-22	2.74862e-21	Up	NA	NA	NA	NA	NA	NA	NA
CL3053.Contig5_All	1009	0.01	6.8	9.40939	9.6834e-21	1.58477e-19	Up	gi|405954119|gb|EKC21644.1|/3.49335e-91/hypothetical protein CGI_10003535 [Crassostrea gigas]	gi|5578|emb|X63421.1|/2e-34/A.californica CAPL-A mRNA ( alternative exon cassette A2)	sp|P05132|KAPCA_MOUSE/1e-83/cAMP-dependent protein kinase catalytic subunit alpha OS=Mus musculus GN=Prkaca PE=1 SV=3	crg:105336635/2e-85/cAMP-dependent protein kinase catalytic subunit-like; K04345 protein kinase A [EC:2.7.11.11]	SPAC17G8.14c_2/2e-27/---	PTHR24353:SF54/2.6E-133/--	NA
CL4036.Contig1_All	2334	0.01	6.75	9.39874	8.008e-49	2.97015e-47	Up	gi|405962491|gb|EKC28161.1|/0/L-ascorbate oxidase [Crassostrea gigas]	NA	NA	aqu:100635277/2e-24/uncharacterized LOC100635277; K11989 indian hedgehog	SPAC1F7.08/7e-36/---	PTHR11709/1.9E-150/--	NA
Unigene32042_All	396	0.01	6.69	9.38586	6.7964e-08	5.12795e-07	Up	gi|66814356|ref|XP_641357.1|/7.90867e-07/hypothetical protein DDB_G0280295 [Dictyostelium discoideum AX4] &gt;gi|60469380|gb|EAL67374.1| hypothetical protein DDB_G0280295 [Dictyostelium discoideum AX4]	NA	sp|Q25460|FP1_MYTED/1e-08/Adhesive plaque matrix protein (Fragment) OS=Mytilus edulis GN=FP1 PE=1 SV=1	NA	NA	NA	NA
Unigene35907_All	544	0.01	6.62	9.37069	6.99486e-11	6.72586e-10	Up	NA	gi|110950893|gb|DQ779953.1|/6e-08/Argopecten irradians clone BSAD190 microsatellite sequence	NA	NA	NA	NA	NA
Unigene36661_All	474	0.01	6.58	9.36194	4.3379e-09	3.64157e-08	Up	NA	NA	NA	NA	NA	NA	NA
CL456.Contig8_All	2405	0.01	6.55	9.35535	8.008e-49	2.96832e-47	Up	gi|405969074|gb|EKC34084.1|/0/Spermatogenesis-associated protein 18-like protein [Crassostrea gigas]	gi|524875820|ref|XM_005094576.1|/3e-16/PREDICTED: Aplysia californica mitochondria-eating protein-like (LOC101857320), mRNA	sp|Q503Q1|MIEAP_DANRE/2e-119/Mitochondria-eating protein OS=Danio rerio GN=spata18 PE=2 SV=2	pss:102463303/7e-06/COLEC12; collectin sub-family member 12; K10062 collectin sub-family member 12	NA	PTHR21771/5.5E-161/--	biological_process:GO:0035695//mitochondrion degradation by induced vacuole formation;GO:0035694//mitochondrial protein catabolic process;cellular_component:GO:0005741//mitochondrial outer membrane;
Unigene46339_All	477	0.01	6.54	9.35315	2.18036e-09	1.87767e-08	Up	NA	NA	NA	NA	NA	NA	NA
CL5027.Contig1_All	1083	0.01	6.49	9.34207	2.4464e-21	4.09713e-20	Up	NA	gi|568990927|ref|XM_006520234.1|/7e-06/PREDICTED: Mus musculus anoctamin 6 (Ano6), transcript variant X6, mRNA	NA	NA	NA	NA	NA
CL1658.Contig3_All	2851	0.01	6.44	9.33092	6.875e-57	3.00447e-55	Up	gi|405953253|gb|EKC20951.1|/0/Axonemal 84 kDa protein [Crassostrea gigas]	gi|1574933|gb|U31600.1|HEU31600/1e-12/Heliocidaris erythrogramma HEHBOX10 (HeHbox10) gene, partial cds	sp|Q8T880|AXP83_CIOIN/5e-140/Axonemal 84 kDa protein OS=Ciona intestinalis GN=AXP83.9 PE=2 SV=1	crg:105347030/0.0/axonemal 84 kDa protein-like; K17580 cancer susceptibility candidate protein 1	XF1267/3e-14/---	PF12366/1.1E-6/Cancer susceptibility candidate 1	NA
CL2520.Contig2_All	2029	0.01	6.43	9.32867	3.69212e-40	1.11948e-38	Up	gi|405976228|gb|EKC40741.1|/1.07254e-30/hypothetical protein CGI_10021228 [Crassostrea gigas]	NA	NA	NA	NA	NA	NA
CL1931.Contig1_All	424	0.01	6.39	9.31967	6.7964e-08	5.13438e-07	Up	NA	NA	NA	NA	NA	NA	NA
CL40.Contig3_All	3093	0.01	6.32	9.30378	1.78761e-60	8.34421e-59	Up	gi|405951405|gb|EKC19320.1|/1.5431e-34/hypothetical protein CGI_10008806 [Crassostrea gigas]	NA	sp|Q55GJ2|IREA_DICDI/5e-08/Probable serine/threonine-protein kinase ireA OS=Dictyostelium discoideum GN=ireA PE=3 SV=1	pxy:105380041/2e-07/peptidyl-prolyl cis-trans isomerase-like 4; K12735 peptidyl-prolyl cis-trans isomerase-like 4 [EC:5.2.1.8]	NA	NA	NA
Unigene33254_All	359	0.01	6.25	9.28771	1.06483e-06	7.10923e-06	Up	NA	gi|66841662|gb|AC154691.3|/7e-19/Mus musculus BAC clone RP24-336F24 from chromosome 16, complete sequence	NA	NA	NA	NA	NA
Unigene31387_All	420	0.01	6.25	9.28771	6.7964e-08	5.13502e-07	Up	gi|405963841|gb|EKC29382.1|/2.47856e-16/Innexin-11 [Crassostrea gigas]	NA	sp|A8WVX4|INX19_CAEBR/8e-13/Innexin-19 OS=Caenorhabditis briggsae GN=inx-19 PE=3 SV=3	tsp:Tsp_01015/3e-06/innexin unc-9; K03132 transcription initiation factor TFIID subunit 7	NA	PS51013/9.921/Pannexin family profile.	NA
CL3835.Contig2_All	420	0.01	6.25	9.28771	6.7964e-08	5.12731e-07	Up	NA	NA	NA	NA	NA	NA	NA
CL2403.Contig1_All	1234	0.01	6.22	9.28077	1.98279e-23	3.61701e-22	Up	gi|405967697|gb|EKC32831.1|/7.83829e-110/Methyl-CpG-binding domain protein 2 [Crassostrea gigas]	gi|238915562|gb|FJ986345.1|/3e-33/Nodipecten subnodosus clone NsubA1C12 microsatellite sequence	sp|Q9UBB5|MBD2_HUMAN/3e-66/Methyl-CpG-binding domain protein 2 OS=Homo sapiens GN=MBD2 PE=1 SV=1	crg:105346347/2e-110/methyl-CpG-binding domain protein 2-like; K11590 methyl-CpG-binding domain protein 2	NA	PF01429/4.5E-20/Methyl-CpG binding domain	biological_process:GO:0000122//negative regulation of transcription from RNA polymerase II promoter;GO:0006346//methylation-dependent chromatin silencing;cellular_component:GO:0005634//nucleus;molecular_function:GO:0008327//methyl-CpG binding;
CL209.Contig4_All	6116	0.01	6.14	9.26209	6.14492e-117	5.71895e-115	Up	gi|405953685|gb|EKC21299.1|/6.72223e-173/Regulator of differentiation 1 [Crassostrea gigas]	gi|512910081|ref|XM_004927023.1|/8e-19/PREDICTED: Bombyx mori polypyrimidine tract-binding protein 3-like (LOC101740192), mRNA	sp|O95758|PTBP3_HUMAN/9e-140/Polypyrimidine tract-binding protein 3 OS=Homo sapiens GN=PTBP3 PE=1 SV=2	aec:105143854/2e-154/polypyrimidine tract-binding protein 1; K14948 polypyrimidine tract-binding protein 2	NA	PF13893/5.7E-10/RNA recognition motif. (a.k.a. RRM, RBD, or RNP domain)	NA
Unigene32279_All	287	0.01	6.12	9.25739	3.31916e-05	0.000182339	Up	NA	NA	NA	NA	NA	NA	NA
Unigene38939_All	336	0.01	6.08	9.24793	4.21482e-06	2.62022e-05	Up	NA	NA	NA	NA	NA	NA	NA
CL1535.Contig4_All	368	0.01	6.05	9.24079	2.1185e-06	1.37364e-05	Up	NA	NA	NA	NA	NA	NA	NA
Unigene44958_All	323	0.01	6.01	9.23122	8.3855e-06	5.00161e-05	Up	NA	NA	NA	NA	NA	NA	NA
CL4648.Contig1_All	306	0.01	5.97	9.22159	3.31916e-05	0.000182505	Up	NA	NA	NA	NA	NA	NA	NA
Unigene47808_All	455	0.01	5.95	9.21675	3.41608e-08	2.65486e-07	Up	NA	NA	NA	NA	NA	NA	NA
Unigene38139_All	278	0.01	5.94	9.21432	6.60358e-05	0.000346605	Up	NA	NA	NA	NA	NA	NA	NA
CL2534.Contig3_All	2195	0.01	5.91	9.20701	3.69212e-40	1.11892e-38	Up	gi|524865350|ref|XP_005089505.1|/0/PREDICTED: galactocerebrosidase-like [Aplysia californica]	gi|524867933|ref|XM_005090717.1|/2e-10/PREDICTED: Aplysia californica galactocerebrosidase-like (LOC101859299), mRNA	sp|B5X3C1|GALC_SALSA/0.0/Galactocerebrosidase OS=Salmo salar GN=galc PE=2 SV=1	dre:406385/0.0/galcb, galc, wu:fi04e07, zgc:56444; galactosylceramidase b (EC:3.2.1.46); K01202 galactosylceramidase [EC:3.2.1.46]	NA	PR00850/2.4E-55/Glycosyl hydrolase family 59 signature	NA
CL4890.Contig1_All	759	0.01	5.9	9.20457	1.43228e-13	1.63131e-12	Up	NA	NA	NA	NA	NA	NA	NA
CL2520.Contig3_All	1916	0.01	5.84	9.18982	1.75197e-34	4.57392e-33	Up	gi|405976228|gb|EKC40741.1|/1.00078e-30/hypothetical protein CGI_10021228 [Crassostrea gigas]	NA	NA	NA	NA	NA	NA
Unigene34943_All	806	0.01	5.84	9.18982	1.81877e-14	2.17848e-13	Up	gi|405963699|gb|EKC29255.1|/9.88592e-13/hypothetical protein CGI_10027470 [Crassostrea gigas]	NA	sp|Q54G14|Y0266_DICDI/3e-07/Uncharacterized protein DDB_G0290685 OS=Dictyostelium discoideum GN=DDB_G0290685 PE=2 SV=2	cmk:103182719/2e-08/neurofilament medium polypeptide-like; K04573 neurofilament medium polypeptide (neurofilament 3)	NA	NA	NA
Unigene45516_All	282	0.01	5.83	9.18735	6.60358e-05	0.000346333	Up	NA	NA	NA	NA	NA	NA	NA
CL1118.Contig1_All	549	0.01	5.82	9.18488	1.09592e-09	9.64998e-09	Up	NA	NA	NA	NA	NA	NA	NA
CL539.Contig2_All	2735	0.01	5.82	9.18488	2.02314e-49	7.62572e-48	Up	gi|405975327|gb|EKC39901.1|/0/hypothetical protein CGI_10016633 [Crassostrea gigas]	NA	sp|A0JPI9|LRC74_RAT/4e-56/Leucine-rich repeat-containing protein 74 OS=Rattus norvegicus GN=Lrrc74 PE=2 SV=1	hgl:101701752/4e-44/Lrrc74b; leucine rich repeat containing 74B; K07374 tubulin alpha	NA	PF13516/0.06/Leucine Rich repeat	NA
CL4276.Contig2_All	1707	0.01	5.82	9.18488	1.34053e-30	3.12262e-29	Up	gi|390343594|ref|XP_797590.2|/1.34397e-116/PREDICTED: jmjC domain-containing protein 4-like [Strongylocentrotus purpuratus]	gi|617388401|ref|XM_007548632.1|/1e-14/PREDICTED: Poecilia formosa jumonji domain containing 4 (jmjd4), mRNA	sp|Q5ZHV5|JMJD4_CHICK/5e-113/JmjC domain-containing protein 4 OS=Gallus gallus GN=JMJD4 PE=2 SV=1	smm:Smp_147870/4e-61/protein phosphatase 2C; K17500 integrin-linked kinase-associated serine/threonine phosphatase 2C [EC:3.1.3.16]	NA	SM00558/2.4E-7/A domain family that is part of the cupin metalloenzyme superfamily.	NA
CL2150.Contig2_All	1290	0.01	5.8	9.17991	7.84832e-23	1.39663e-21	Up	gi|405964768|gb|EKC30217.1|/7.15878e-69/UPF0563 protein C17orf95-like protein [Crassostrea gigas]	NA	sp|Q6DJF8|MET23_XENLA/3e-65/Methyltransferase-like protein 23 OS=Xenopus laevis GN=mettl23 PE=2 SV=1	bmy:Bm1_35310/9e-11/N-acetylglucosamine kinase (EC:2.7.1.59); K00884 N-acetylglucosamine kinase [EC:2.7.1.59]	YLR285w/3e-07/---	PTHR14614:SF2/2.8E-61/--	NA
Unigene32249_All	531	0.01	5.8	9.17991	2.18036e-09	1.87794e-08	Up	NA	NA	NA	NA	NA	NA	NA
CL1576.Contig1_All	1351	0.01	5.8	9.17991	5.0093e-24	9.33274e-23	Up	NA	NA	NA	NA	NA	NA	NA
Unigene38171_All	285	0.01	5.76	9.16993	6.60358e-05	0.000346303	Up	NA	NA	NA	NA	NA	NA	NA
Unigene45801_All	771	0.01	5.73	9.16239	1.43228e-13	1.63162e-12	Up	NA	NA	NA	NA	NA	NA	NA
CL1073.Contig5_All	338	0.01	5.7	9.15482	8.3855e-06	4.99766e-05	Up	NA	NA	NA	NA	NA	NA	NA
Unigene34698_All	949	0.01	5.66	9.14466	1.4741e-16	1.9804e-15	Up	NA	NA	NA	NA	NA	NA	NA
Unigene43450_All	1239	0.01	5.65	9.14211	1.22964e-21	2.08365e-20	Up	gi|405978323|gb|EKC42724.1|/6.35889e-51/GTPase IMAP family member 7 [Crassostrea gigas]	NA	sp|Q8NHV1|GIMA7_HUMAN/2e-48/GTPase IMAP family member 7 OS=Homo sapiens GN=GIMAP7 PE=1 SV=1	NA	NA	PS51720/41.872/AIG1-type G domain profile.	NA
CL266.Contig1_All	2072	0.01	5.64	9.13955	2.82504e-36	7.75125e-35	Up	gi|326678521|ref|XP_003201083.1|/3.32216e-19/PREDICTED: si:ch211-197g15.9 isoform X1 [Danio rerio]	NA	sp|Q8TCB0|IFI44_HUMAN/2e-11/Interferon-induced protein 44 OS=Homo sapiens GN=IFI44 PE=2 SV=2	xma:102225574/4e-12/uncharacterized LOC102225574; K07374 tubulin alpha	NA	PF07679/6.1E-10/Immunoglobulin I-set domain	NA
Unigene43977_All	397	0.01	5.56	9.11894	1.06483e-06	7.10844e-06	Up	gi|405971000|gb|EKC35860.1|/1.93896e-21/Ribonucleases P/MRP protein subunit POP1 [Crassostrea gigas]	NA	sp|Q99575|POP1_HUMAN/1e-08/Ribonucleases P/MRP protein subunit POP1 OS=Homo sapiens GN=POP1 PE=1 SV=2	crg:105344825/3e-22/ribonucleases P/MRP protein subunit POP1-like; K01164 ribonuclease P/MRP protein subunit POP1 [EC:3.1.26.5]	NA	PTHR22731/4.3E-12/--	NA
Unigene34206_All	277	0.01	5.54	9.11374	0.00013138	0.000657314	Up	NA	NA	NA	NA	NA	NA	NA
Unigene33789_All	364	0.01	5.53	9.11114	4.21482e-06	2.61995e-05	Up	NA	NA	NA	NA	NA	NA	NA
CL204.Contig1_All	508	0.01	5.51	9.10591	1.71703e-08	1.37081e-07	Up	NA	NA	NA	NA	NA	NA	NA
CL1925.Contig2_All	1268	0.01	5.5	9.10329	2.4464e-21	4.09485e-20	Up	gi|556109478|gb|ESO98130.1|/1.46671e-42/hypothetical protein LOTGIDRAFT_143067 [Lottia gigantea]	NA	sp|P83088|FUCTC_DROME/2e-34/Alpha-(1,3)-fucosyltransferase C OS=Drosophila melanogaster GN=FucTC PE=2 SV=4	crg:105318042/5e-40/alpha-(1,3)-fucosyltransferase 9-like; K00753 glycoprotein 3-alpha-L-fucosyltransferase [EC:2.4.1.214]	NA	PTHR11929:SF129/3.5E-69/--	NA
Unigene31975_All	1015	0.01	5.46	9.09276	7.40932e-17	1.00753e-15	Up	NA	NA	NA	NA	NA	NA	NA
CL5233.Contig1_All	1298	0.01	5.45	9.09011	1.22964e-21	2.08306e-20	Up	NA	NA	NA	NA	NA	NA	NA
CL3942.Contig2_All	1641	0.01	5.44	9.08746	1.3025e-27	2.78549e-26	Up	gi|405973904|gb|EKC38593.1|/3.17608e-83/Spermatogenesis-associated protein 6 [Crassostrea gigas]	NA	sp|Q2KJG1|SPAT6_BOVIN/5e-44/Spermatogenesis-associated protein 6 OS=Bos taurus GN=SPATA6 PE=2 SV=2	cin:100180766/4e-38/spermatogenesis-associated protein 6; K12172 E3 SUMO-protein ligase RanBP2	NA	PF14909/1.7E-49/Spermatogenesis-assoc protein 6	NA
CL3385.Contig3_All	696	0.01	5.4	9.07682	1.76717e-11	1.77152e-10	Up	gi|556117021|gb|ESP05673.1|/1.31437e-18/hypothetical protein LOTGIDRAFT_152541 [Lottia gigantea]	NA	NA	crg:105327597/4e-20/amiloride-sensitive sodium channel subunit gamma-like; K04827 amiloride-sensitive sodium channel subunit gamma	NA	NA	NA
CL1274.Contig2_All	5153	0.01	5.39	9.07414	1.82398e-86	1.21413e-84	Up	gi|405976456|gb|EKC40962.1|/0/Zinc finger MIZ domain-containing protein 1 [Crassostrea gigas]	gi|524915283|ref|XM_005112388.1|/3e-24/PREDICTED: Aplysia californica zinc finger MIZ domain-containing protein 1-like (LOC101863318), partial mRNA	sp|Q6P1E1|ZMIZ1_MOUSE/0.0/Zinc finger MIZ domain-containing protein 1 OS=Mus musculus GN=Zmiz1 PE=2 SV=1	dre:562982/2e-21/pias1b, si:dkey-9i9.1; protein inhibitor of activated STAT, 1b; K04706 E3 SUMO-protein ligase PIAS1	NA	PTHR10782/2.2E-248/--	NA
CL2692.Contig2_All	1075	0.01	5.38	9.07146	9.40866e-18	1.34236e-16	Up	gi|405973515|gb|EKC38223.1|/6.56605e-22/hypothetical protein CGI_10025720 [Crassostrea gigas]	NA	NA	NA	NA	PF01643/1.8E-7/Acyl-ACP thioesterase	NA
Unigene45909_All	676	0.01	5.37	9.06878	3.51584e-11	3.45556e-10	Up	gi|46277180|tpg|DAA01768.3|/9.75244e-07/TPA_exp: putative tyrosine recombinase [Lytechinus variegatus]	NA	NA	NA	NA	NA	NA
CL2947.Contig1_All	956	0.01	5.35	9.0634	1.16086e-15	1.48923e-14	Up	NA	NA	NA	NA	NA	NA	NA
Unigene41372_All	285	0.01	5.35	9.0634	0.00013138	0.000658024	Up	NA	NA	NA	NA	NA	NA	NA
CL868.Contig2_All	867	0.01	5.33	9.05799	3.6185e-14	4.25638e-13	Up	gi|556114128|gb|ESP02780.1|/1.2064e-06/hypothetical protein LOTGIDRAFT_110659, partial [Lottia gigantea]	NA	NA	NA	NA	NA	NA
CL4832.Contig4_All	6183	0.01	5.27	9.04166	2.10628e-101	1.66482e-99	Up	gi|405950979|gb|EKC18930.1|/3.26329e-58/Macrophage colony-stimulating factor 1 receptor 2 [Crassostrea gigas]	NA	sp|P42689|SRK3_SPOLA/4e-20/Tyrosine-protein kinase SRK3 (Fragment) OS=Spongilla lacustris GN=SRK3 PE=2 SV=1	crg:105341914/1e-18/tyrosine-protein kinase Yes-like; K05705 tyrosine-protein kinase Yes [EC:2.7.10.2]	L138452_1/2e-09/---	PS50011/26.605/Protein kinase domain profile.	NA
CL4169.Contig2_All	1098	0.01	5.17	9.01402	1.87188e-17	2.62594e-16	Up	gi|524868902|ref|XP_005091249.1|/8.66224e-70/PREDICTED: D-aspartate oxidase-like isoform X1 [Aplysia californica]	NA	sp|P31228|OXDD_BOVIN/1e-59/D-aspartate oxidase OS=Bos taurus GN=DDO PE=1 SV=2	crg:105343454/8e-82/D-aspartate oxidase-like; K00272 D-aspartate oxidase [EC:1.4.3.1]	Rv1905c/5e-36/---	PF01266/9.9E-24/FAD dependent oxidoreductase	NA
CL2638.Contig1_All	1404	0.01	5.15	9.00843	3.10654e-22	5.3929e-21	Up	NA	gi|117582218|gb|EF056516.1|/2e-10/Mizuhopecten yessoensis clone PYERHS008 microsatellite sequence	NA	NA	NA	NA	NA
CL2656.Contig1_All	2115	0.01	5.14	9.00562	1.37967e-33	3.50633e-32	Up	gi|405959164|gb|EKC25226.1|/1.86975e-17/hypothetical protein CGI_10011941 [Crassostrea gigas]	NA	NA	crg:105328290/3e-07/hemicentin-2-like; K16680 echinoid	NA	NA	NA
Unigene41508_All	371	0.01	5.11	8.99718	8.3855e-06	5.00656e-05	Up	NA	NA	NA	NA	NA	NA	NA
Unigene42561_All	317	0.01	5.07	8.98584	6.60358e-05	0.000346937	Up	NA	NA	NA	NA	NA	NA	NA
CL3177.Contig2_All	2591	0.01	5.02	8.97154	1.85577e-40	5.66674e-39	Up	gi|405971680|gb|EKC36503.1|/0/BTB/POZ domain-containing protein 2 [Crassostrea gigas]	gi|524908101|ref|XM_005109101.1|/8e-17/PREDICTED: Aplysia californica BTB/POZ domain-containing protein 2-like (LOC101854204), mRNA	sp|Q9BX70|BTBD2_HUMAN/0.0/BTB/POZ domain-containing protein 2 OS=Homo sapiens GN=BTBD2 PE=1 SV=1	crg:105320821/0.0/BTB/POZ domain-containing protein 1-like; K10477 BTB/POZ domain-containing protein 1/2	NA	PS50097/16.238/BTB domain profile.	NA
CL2024.Contig4_All	460	0.01	5	8.96578	5.35216e-07	3.69058e-06	Up	NA	gi|193734860|gb|EU623941.1|/2e-16/Argopecten irradians clone HWDD064 microsatellite sequence	NA	NA	NA	NA	NA
CL4422.Contig2_All	1620	0.06	29.85	8.95855	2.00524e-144	2.36195e-142	Up	gi|405978323|gb|EKC42724.1|/5.5723e-32/GTPase IMAP family member 7 [Crassostrea gigas]	gi|255098792|gb|FJ590509.1|/3e-21/Argopecten irradians manganese superoxide dismutase (MnSOD) gene, complete cds	sp|Q8NHV1|GIMA7_HUMAN/3e-25/GTPase IMAP family member 7 OS=Homo sapiens GN=GIMAP7 PE=1 SV=1	NA	NA	PTHR10903/2.5E-50/--	NA
CL1624.Contig2_All	2332	0.01	4.97	8.9571	5.6205e-36	1.52892e-34	Up	NA	NA	NA	NA	NA	NA	NA
CL3882.Contig2_All	496	0.01	4.97	8.9571	1.35216e-07	9.91927e-07	Up	NA	NA	NA	NA	NA	NA	NA
Unigene34269_All	592	0.01	4.97	8.9571	4.3379e-09	3.63802e-08	Up	NA	NA	NA	NA	NA	NA	NA
Unigene47528_All	419	0.01	4.96	8.9542	2.1185e-06	1.37305e-05	Up	gi|405961954|gb|EKC27681.1|/6.78364e-06/hypothetical protein CGI_10013835 [Crassostrea gigas]	NA	NA	NA	NA	NA	NA
CL4453.Contig5_All	985	0.01	4.95	8.95128	4.59492e-15	5.71362e-14	Up	gi|405963036|gb|EKC28645.1|/1.53094e-59/EF-hand calcium-binding domain-containing protein 6 [Crassostrea gigas]	NA	sp|Q6P1E8|EFCB6_MOUSE/2e-16/EF-hand calcium-binding domain-containing protein 6 OS=Mus musculus GN=Efcab6 PE=2 SV=2	mgp:100545620/8e-13/SULT4A1; sulfotransferase family 4A, member 1; K11823 sulfotransferase 4A1 [EC:2.8.2.-]	NA	PS50222/8.321/EF-hand calcium-binding domain profile.	NA
Unigene34010_All	304	0.01	4.95	8.95128	0.00013138	0.000656497	Up	NA	NA	NA	NA	NA	NA	NA
CL4469.Contig2_All	1437	0.01	4.91	8.93958	6.18056e-22	1.06223e-20	Up	gi|514771217|ref|XP_005025577.1|/9.57341e-57/PREDICTED: LOW QUALITY PROTEIN: cartilage intermediate layer protein 1 [Anas platyrhynchos]	NA	sp|Q66K08|CILP1_MOUSE/8e-50/Cartilage intermediate layer protein 1 OS=Mus musculus GN=Cilp PE=2 SV=1	NA	NA	PTHR15031/6.4E-94/--	NA
CL1551.Contig2_All	345	0.01	4.91	8.93958	3.31916e-05	0.000182455	Up	NA	NA	NA	NA	NA	NA	NA
CL3165.Contig2_All	3709	0.01	4.88	8.93074	2.72128e-56	1.17309e-54	Up	gi|405951666|gb|EKC19560.1|/2.39882e-130/hypothetical protein CGI_10008228 [Crassostrea gigas]	gi|344310976|gb|HQ025801.1|/7e-09/Argopecten irradians catalase gene, complete cds	sp|Q5U239|TM145_XENLA/2e-11/Transmembrane protein 145 OS=Xenopus laevis GN=tmem145 PE=2 SV=1	NA	NA	PTHR23252/3.1E-21/--	NA
CL4938.Contig2_All	504	0.01	4.83	8.91588	2.69016e-07	1.91907e-06	Up	NA	NA	NA	NA	NA	NA	NA
Unigene34180_All	549	0.01	4.82	8.91289	3.41608e-08	2.65588e-07	Up	NA	NA	NA	NA	NA	NA	NA
CL4626.Contig1_All	660	0.01	4.81	8.90989	1.09592e-09	9.64576e-09	Up	NA	NA	NA	NA	NA	NA	NA
CL2102.Contig7_All	2724	0.01	4.8	8.90689	9.3277e-41	2.86715e-39	Up	gi|405966920|gb|EKC32147.1|/0/Clathrin interactor 1 [Crassostrea gigas]	gi|524883289|ref|XM_005098221.1|/3e-16/PREDICTED: Aplysia californica clathrin interactor 1-like (LOC101847340), mRNA	sp|A7Z035|EPN4_BOVIN/3e-105/Clathrin interactor 1 OS=Bos taurus GN=CLINT1 PE=2 SV=1	cmk:103177297/4e-100/clint1; clathrin interactor 1; K12471 epsin	NA	PTHR12276/1.3E-127/--	NA
Unigene31671_All	312	0.01	4.79	8.90388	0.00013138	0.000658516	Up	NA	NA	NA	NA	NA	NA	NA
Unigene39685_All	912	0.01	4.79	8.90388	1.43228e-13	1.6307e-12	Up	gi|405971754|gb|EKC36569.1|/1.04536e-19/hypothetical protein CGI_10020114 [Crassostrea gigas]	NA	NA	NA	NA	PF01336/1.1E-5/OB-fold nucleic acid binding domain	NA
CL1052.Contig2_All	899	0.01	4.76	8.89482	2.84956e-13	3.1842e-12	Up	NA	NA	NA	NA	NA	NA	NA
Unigene46416_All	903	0.01	4.73	8.8857	2.84956e-13	3.18361e-12	Up	NA	NA	NA	NA	NA	NA	NA
Unigene46663_All	518	0.01	4.73	8.8857	1.35216e-07	9.91444e-07	Up	NA	NA	NA	NA	NA	NA	NA
Unigene38057_All	562	0.01	4.7	8.87652	3.41608e-08	2.6552e-07	Up	gi|405972106|gb|EKC36893.1|/2.59099e-42/Hemagglutinin/amebocyte aggregation factor [Crassostrea gigas]	NA	sp|Q01528|HAAF_LIMPO/2e-31/Hemagglutinin/amebocyte aggregation factor OS=Limulus polyphemus PE=1 SV=1	xtr:779570/3e-17/braf, B-Raf, b-raf1, braf1, raf, rafb1; B-Raf proto-oncogene, serine/threonine kinase; K04365 B-Raf proto-oncogene serine/threonine-protein kinase [EC:2.7.11.1]	NA	PTHR15040/4.6E-47/--	NA
Unigene31278_All	890	0.01	4.69	8.87344	5.66928e-13	6.22434e-12	Up	NA	gi|255098792|gb|FJ590509.1|/1e-19/Argopecten irradians manganese superoxide dismutase (MnSOD) gene, complete cds	NA	NA	NA	NA	NA
CL4044.Contig2_All	1814	0.01	4.66	8.86419	4.06e-26	8.2027e-25	Up	gi|585659061|ref|XP_006816116.1|/8.48757e-08/PREDICTED: uncharacterized protein LOC102802303 [Saccoglossus kowalevskii]	NA	NA	NA	NA	NA	NA
CL3440.Contig1_All	2265	0.01	4.65	8.86109	1.08649e-32	2.69646e-31	Up	gi|405966992|gb|EKC32209.1|/1.84115e-10/hypothetical protein CGI_10007491 [Crassostrea gigas]	NA	NA	NA	NA	NA	NA
CL3433.Contig2_All	1885	0.01	4.65	8.86109	5.15558e-27	1.08072e-25	Up	NA	NA	NA	NA	NA	NA	NA
Unigene34294_All	362	0.01	4.64	8.85798	3.31916e-05	0.000182605	Up	NA	NA	NA	NA	NA	NA	NA
CL1702.Contig2_All	966	0.01	4.63	8.85487	7.1991e-14	8.34288e-13	Up	NA	NA	NA	NA	NA	NA	NA
Unigene36603_All	364	0.01	4.61	8.84862	3.31916e-05	0.000182356	Up	NA	NA	NA	NA	NA	NA	NA
Unigene36141_All	365	0.01	4.6	8.84549	3.31916e-05	0.000182855	Up	gi|405978860|gb|EKC43221.1|/3.27261e-32/hypothetical protein CGI_10027320 [Crassostrea gigas]	NA	sp|P12957|CALD1_CHICK/4e-07/Caldesmon OS=Gallus gallus GN=CALD1 PE=1 SV=2	pss:102447883/3e-08/CALD1; caldesmon 1; K12327 caldesmon	NA	NA	NA
CL4736.Contig2_All	5392	0.01	4.6	8.84549	1.67309e-77	1.01817e-75	Up	gi|405950265|gb|EKC18263.1|/0/Thrombospondin-4 [Crassostrea gigas]	NA	sp|P35443|TSP4_HUMAN/3e-167/Thrombospondin-4 OS=Homo sapiens GN=THBS4 PE=1 SV=2	crg:105319080/0.0/uncharacterized LOC105319080; K04659 thrombospondin 2/3/4/5; K05719 integrin beta 1; K06493 integrin beta 3; K16338 syndecan 4	NA	PS50268/17.192/Cadherins domain profile.	NA
CL2165.Contig4_All	2366	0.01	4.59	8.84235	6.93468e-34	1.78116e-32	Up	gi|405975424|gb|EKC39989.1|/2.78324e-33/Calcium-dependent protein kinase 31 [Crassostrea gigas]	NA	sp|Q9JM83|CALM4_MOUSE/2e-07/Calmodulin-4 OS=Mus musculus GN=Calm4 PE=2 SV=2	crg:105331896/6e-34/calmodulin-like; K02183 calmodulin	NA	PS50222/8.209/EF-hand calcium-binding domain profile.	NA
CL398.Contig1_All	1664	0.01	4.58	8.8392	9.96614e-24	1.83972e-22	Up	gi|405978075|gb|EKC42490.1|/3.07373e-25/hypothetical protein CGI_10023152 [Crassostrea gigas]	NA	sp|Q01956|KCNC3_RAT/8e-07/Potassium voltage-gated channel subfamily C member 3 OS=Rattus norvegicus GN=Kcnc3 PE=2 SV=1	dre:799410/9e-06/kcnc4, si:ch211-199o1.1; potassium voltage-gated channel, Shaw-related subfamily, member 4; K04890 potassium voltage-gated channel Shaw-related subfamily C member 4	NA	PTHR11537/1.7E-12/--	NA
CL4298.Contig2_All	466	0.01	4.57	8.83605	2.1185e-06	1.37202e-05	Up	NA	NA	NA	NA	NA	NA	NA
CL3670.Contig1_All	1513	0.01	4.56	8.83289	2.4464e-21	4.09599e-20	Up	gi|556108782|gb|ESO97434.1|/3.99038e-69/hypothetical protein LOTGIDRAFT_231601 [Lottia gigantea]	NA	sp|P27701|CD82_HUMAN/2e-38/CD82 antigen OS=Homo sapiens GN=CD82 PE=1 SV=1	crg:105340494/3e-83/CD82 antigen-like; K06509 CD82 antigen	NA	PTHR19282:SF170/6.9E-76/--	NA
Unigene39446_All	368	0.01	4.55	8.82972	3.31916e-05	0.000182622	Up	NA	NA	NA	NA	NA	NA	NA
Unigene40230_All	411	0.01	4.54	8.82655	8.3855e-06	5.00557e-05	Up	NA	NA	NA	NA	NA	NA	NA
CL3634.Contig4_All	848	0.01	4.54	8.82655	8.88236e-12	9.05166e-11	Up	gi|397470140|ref|XP_003806691.1|/1.97658e-06/PREDICTED: uncharacterized protein LOC100972527 [Pan paniscus]	NA	NA	NA	NA	NA	NA
CL5282.Contig1_All	370	0.01	4.52	8.82018	3.31916e-05	0.000182439	Up	NA	NA	NA	NA	NA	NA	NA
Unigene45760_All	328	0.01	4.52	8.82018	0.00013138	0.000657042	Up	NA	NA	NA	NA	NA	NA	NA
CL130.Contig5_All	2494	0.01	4.5	8.81378	8.80594e-35	2.32009e-33	Up	gi|405972623|gb|EKC37383.1|/6.67946e-110/Abhydrolase domain-containing protein 4 [Crassostrea gigas]	NA	sp|Q5EA59|ABHD4_BOVIN/9e-93/Abhydrolase domain-containing protein 4 OS=Bos taurus GN=ABHD4 PE=2 SV=1	crg:105345608/7e-123/abhydrolase domain-containing protein 4-like; K13698 abhydrolase domain-containing protein 4	SPAC6G10.03c/2e-21/---	PTHR10992/6.5E-152/--	NA
Unigene42267_All	330	0.01	4.48	8.80735	0.00013138	0.000657423	Up	NA	NA	NA	NA	NA	NA	NA
Unigene43946_All	410	0.01	4.48	8.80735	1.66832e-05	9.55762e-05	Up	gi|556110647|gb|ESO99298.1|/3.37808e-21/hypothetical protein LOTGIDRAFT_113304, partial [Lottia gigantea]	NA	NA	NA	all1649/3e-16/---	NA	NA
CL874.Contig2_All	1442	0.01	4.48	8.80735	3.8329e-20	6.10712e-19	Up	NA	NA	NA	NA	NA	PS50017/8.923/Death domain profile.	NA
CL2599.Contig1_All	1965	0.01	4.45	8.79766	5.15558e-27	1.08109e-25	Up	gi|405965762|gb|EKC31116.1|/2.68663e-79/tweety-like protein 2 [Crassostrea gigas]	NA	sp|Q6AX57|TTY1A_XENLA/1e-46/Protein tweety homolog 1-A OS=Xenopus laevis GN=ttyh1-a PE=2 SV=1	cmy:102946987/3e-28/TTYH2; tweety family member 2; K02923 large subunit ribosomal protein L38e	NA	PTHR12424/8.2E-80/--	NA
Unigene37880_All	934	0.01	4.45	8.79766	5.66928e-13	6.22321e-12	Up	NA	NA	NA	NA	NA	NA	NA
Unigene31813_All	527	0.01	4.44	8.79442	2.69016e-07	1.9193e-06	Up	NA	NA	NA	NA	NA	NA	NA
Unigene45286_All	527	0.01	4.44	8.79442	2.69016e-07	1.91862e-06	Up	gi|405969312|gb|EKC34289.1|/9.99868e-24/hypothetical protein CGI_10020001 [Crassostrea gigas]	NA	NA	NA	NA	NA	NA
Unigene31684_All	377	0.01	4.43	8.79116	3.31916e-05	0.000182772	Up	NA	NA	NA	NA	NA	NA	NA
CL36.Contig1_All	2089	0.01	4.43	8.79116	8.31336e-29	1.84121e-27	Up	NA	NA	NA	NA	NA	NA	NA
Unigene12054_All	465	0.01	4.41	8.78463	2.1185e-06	1.37187e-05	Up	NA	NA	NA	NA	NA	NA	NA
CL2714.Contig1_All	3018	0.01	4.39	8.77808	2.35654e-41	7.35982e-40	Up	gi|405956994|gb|EKC23233.1|/7.64292e-172/IQ domain-containing protein E [Crassostrea gigas]	NA	sp|Q6IPM2|IQCE_HUMAN/2e-43/IQ domain-containing protein E OS=Homo sapiens GN=IQCE PE=1 SV=2	mdo:100019329/2e-15/TCHH; trichohyalin; K18626 trichohyalin	aq_1006/9e-10/---	PS50096/7.547/IQ motif profile.	NA
Unigene44370_All	358	0.01	4.39	8.77808	6.60358e-05	0.000346153	Up	NA	NA	NA	NA	NA	NA	NA
CL32.Contig1_All	4670	0.01	4.38	8.77479	9.24746e-64	4.54891e-62	Up	gi|405954164|gb|EKC21680.1|/4.42651e-161/hypothetical protein CGI_10003543 [Crassostrea gigas]	NA	sp|Q3UMF0|COBL1_MOUSE/1e-24/Cordon-bleu protein-like 1 OS=Mus musculus GN=Cobll1 PE=1 SV=2	tup:102496654/3e-25/COBL; cordon-bleu WH2 repeat protein; K18623 protein cordon-bleu	YBR112c/6e-06/---	PTHR21557/4.4E-25/--	NA
Unigene40084_All	708	0.01	4.38	8.77479	1.09592e-09	9.64858e-09	Up	NA	NA	NA	NA	NA	NA	NA
CL366.Contig2_All	359	0.01	4.37	8.77149	6.60358e-05	0.000346484	Up	gi|390342455|ref|XP_001200090.2|/1.25149e-20/PREDICTED: ankyrin-1-like [Strongylocentrotus purpuratus]	NA	sp|Q7T163|KDIS_DANRE/9e-15/Kinase D-interacting substrate of 220 kDa OS=Danio rerio GN=kidins220 PE=2 SV=2	aqu:100641148/2e-17/serine/threonine-protein phosphatase 6 regulatory ankyrin repeat subunit A-like; K18441 cytohesin	all2748/5e-14/---	PS50088/9.831/Ankyrin repeat profile.	NA
Unigene45138_All	359	0.01	4.37	8.77149	6.60358e-05	0.000346032	Up	NA	NA	NA	NA	NA	NA	NA
Unigene36831_All	383	0.01	4.35	8.76487	3.31916e-05	0.000182639	Up	NA	NA	NA	NA	NA	NA	NA
CL1653.Contig3_All	2752	0.01	4.34	8.76155	3.58736e-37	1.00439e-35	Up	gi|585674788|ref|XP_006818670.1|/4.99638e-13/PREDICTED: caspase recruitment domain-containing protein 11-like [Saccoglossus kowalevskii]	NA	sp|P39447|ZO1_MOUSE/2e-10/Tight junction protein ZO-1 OS=Mus musculus GN=Tjp1 PE=1 SV=2	acs:100565989/3e-11/card11; caspase recruitment domain family, member 11; K07367 caspase recruitment domain-containing protein 11	NA	NA	NA
CL1462.Contig2_All	1975	0.01	4.33	8.75822	1.02572e-26	2.125e-25	Up	gi|405959798|gb|EKC25790.1|/1.67705e-113/Dipeptidase 1 [Crassostrea gigas]	NA	sp|P31429|DPEP1_RABIT/4e-88/Dipeptidase 1 OS=Oryctolagus cuniculus GN=DPEP1 PE=1 SV=1	crg:105336177/3e-114/dipeptidase 1-like; K01273 membrane dipeptidase [EC:3.4.13.19]	SPAC3A11.10c/9e-66/---	PF01244/1.3E-104/Membrane dipeptidase (Peptidase family M19)	NA
Unigene34270_All	811	0.01	4.29	8.74483	6.99486e-11	6.72693e-10	Up	NA	NA	NA	NA	NA	NA	NA
Unigene44591_All	1194	0.01	4.28	8.74147	5.83482e-16	7.5985e-15	Up	gi|514682671|ref|XP_004988918.1|/1.49165e-09/hypothetical protein PTSG_10001 [Salpingoeca rosetta] &gt;gi|326433867|gb|EGD79437.1| hypothetical protein PTSG_10001 [Salpingoeca rosetta]	gi|470264126|ref|XM_004361056.1|/9e-12/Dictyostelium fasciculatum D111/G-patch domain-containing protein (DFA_05394) mRNA, complete cds	sp|Q05049|MUC1_XENLA/1e-07/Integumentary mucin C.1 (Fragment) OS=Xenopus laevis PE=2 SV=1	xtr:100498375/1e-07/mucin-2-like; K10955 intestinal mucin-2	SSO3043/1e-07/---	NA	NA
CL42.Contig1_All	4266	0.01	4.28	8.74147	6.875e-57	3.0023e-55	Up	gi|405955467|gb|EKC22575.1|/1.60661e-85/ETS-related transcription factor Elf-5 [Crassostrea gigas]	NA	sp|Q32LN0|EHF_BOVIN/3e-21/ETS homologous factor OS=Bos taurus GN=EHF PE=2 SV=1	crg:105348386/7e-91/ETS-related transcription factor Elf-3-like; K17102 ETS homologous factor	NA	PS50061/13.815/Ets-domain profile.	NA
CL3841.Contig2_All	2750	0.01	4.26	8.73471	1.41996e-36	3.9228e-35	Up	gi|637345608|ref|XP_008117325.1|/1.22337e-27/PREDICTED: glycine-rich cell wall structural protein [Anolis carolinensis]	gi|597778143|ref|XM_007252653.1|/1e-15/PREDICTED: Astyanax mexicanus heterogeneous nuclear ribonucleoprotein M (hnrnpm), transcript variant X3, mRNA	sp|Q966L9|GLH2_CAEEL/1e-23/ATP-dependent RNA helicase glh-2 OS=Caenorhabditis elegans GN=glh-2 PE=1 SV=1	crg:105332998/1e-37/nucleolin-like; K11294 nucleolin	DR0392/4e-18/---	PS50102/9.712/Eukaryotic RNA Recognition Motif (RRM) profile.	NA
CL3942.Contig1_All	1719	0.01	4.25	8.73132	1.56145e-22	2.75023e-21	Up	gi|405973904|gb|EKC38593.1|/1.4137e-97/Spermatogenesis-associated protein 6 [Crassostrea gigas]	NA	sp|Q2KJG1|SPAT6_BOVIN/7e-48/Spermatogenesis-associated protein 6 OS=Bos taurus GN=SPATA6 PE=2 SV=2	cin:100180766/1e-42/spermatogenesis-associated protein 6; K12172 E3 SUMO-protein ligase RanBP2	NA	PTHR16435/1.4E-89/--	NA
CL4035.Contig1_All	616	0.01	4.24	8.72792	6.7964e-08	5.13566e-07	Up	NA	NA	NA	NA	NA	NA	NA
Unigene37600_All	460	0.01	4.23	8.72451	4.21482e-06	2.62238e-05	Up	NA	NA	NA	NA	NA	NA	NA
Unigene35957_All	392	0.01	4.23	8.72451	3.31916e-05	0.000182755	Up	gi|405978570|gb|EKC42950.1|/7.08925e-48/SID1 transmembrane family member 1 [Crassostrea gigas]	NA	sp|Q9JHB4|WDR31_MOUSE/6e-33/WD repeat-containing protein 31 OS=Mus musculus GN=Wdr31 PE=2 SV=1	spu:574971/2e-11/transcription initiation factor TFIID subunit 5; K03130 transcription initiation factor TFIID subunit 5	all0438_2/3e-09/---	SM00320/0.39/WD40 repeats	NA
CL3495.Contig1_All	402	0.01	4.21	8.71768	3.31916e-05	0.000182722	Up	NA	NA	NA	NA	NA	NA	NA
Unigene40067_All	348	0.01	4.21	8.71768	0.00013138	0.000657369	Up	NA	NA	NA	NA	NA	NA	NA
Unigene32471_All	463	0.01	4.2	8.71425	4.21482e-06	2.61833e-05	Up	NA	NA	NA	NA	NA	NA	NA
CL107.Contig1_All	715	0.01	4.19	8.71081	4.3379e-09	3.64106e-08	Up	NA	NA	NA	NA	NA	NA	NA
Unigene31309_All	725	0.01	4.19	8.71081	2.18036e-09	1.87821e-08	Up	gi|556961381|ref|XP_005991022.1|/4.55305e-32/PREDICTED: DNA-directed RNA polymerases I, II, and III subunit RPABC5-like isoform X1 [Latimeria chalumnae]	gi|259089469|ref|NM_001165063.1|/4e-22/Oncorhynchus mykiss DNA-directed RNA polymerase II 7.6 kDa polypeptide (rpb10), mRNA	sp|P62876|RPAB5_MOUSE/5e-33/DNA-directed RNA polymerases I, II, and III subunit RPABC5 OS=Mus musculus GN=Polr2l PE=2 SV=1	lcm:102351470/1e-32/DNA-directed RNA polymerases I, II, and III subunit RPABC5-like; K03007 DNA-directed RNA polymerases I, II, and III subunit RPABC5	SPAC1B3.12c/1e-24/---	NA	biological_process:GO:0006351//transcription, DNA-templated;molecular_function:GO:0003899//DNA-directed RNA polymerase activity;GO:0003677//DNA binding;GO:0008270//zinc ion binding;
Unigene31969_All	419	0.01	4.18	8.70736	1.66832e-05	9.55489e-05	Up	NA	NA	NA	NA	NA	NA	NA
Unigene36939_All	421	0.01	4.16	8.70044	1.66832e-05	9.56762e-05	Up	gi|585663251|ref|XP_006816891.1|/4.06655e-35/PREDICTED: RNA-directed DNA polymerase from mobile element jockey-like, partial [Saccoglossus kowalevskii]	NA	sp|Q9NBX4|RTXE_DROME/1e-09/Probable RNA-directed DNA polymerase from transposon X-element OS=Drosophila melanogaster GN=X-element\ORF2 PE=3 SV=1	lcm:102353553/6e-17/sorting nexin-29-like; K17935 sorting nexin-29	NA	PS50878/13.283/Reverse transcriptase (RT) catalytic domain profile.	NA
Unigene36666_All	591	0.01	4.15	8.69697	1.35216e-07	9.91565e-07	Up	NA	NA	NA	NA	NA	NA	NA
CL4240.Contig1_All	1094	0.01	4.14	8.69349	3.6185e-14	4.25555e-13	Up	NA	NA	NA	NA	NA	NA	NA
Unigene39310_All	378	0.01	4.12	8.6865	6.60358e-05	0.000346062	Up	NA	NA	NA	NA	NA	NA	NA
CL4842.Contig1_All	726	0.01	4.11	8.68299	4.3379e-09	3.64055e-08	Up	NA	NA	NA	NA	NA	NA	NA
Unigene36862_All	565	0.01	4.11	8.68299	2.69016e-07	1.91884e-06	Up	gi|405964318|gb|EKC29816.1|/9.72623e-29/Cytochrome P450 2C8 [Crassostrea gigas]	NA	sp|Q91W64|CP270_MOUSE/5e-22/Cytochrome P450 2C70 OS=Mus musculus GN=Cyp2c70 PE=2 SV=2	crg:105333814/6e-29/cytochrome P450 2C14-like; K17854 cytochrome P450, family 2, subfamily K	NA	PR00463/1.8E-9/E-class P450 group I signature	NA
Unigene1497_All	2753	0.01	4.09	8.67596	4.42614e-35	1.17436e-33	Up	gi|405978602|gb|EKC42980.1|/4.06838e-31/Calcium-binding protein NCS-1 [Crassostrea gigas]	NA	sp|Q16982|NECX_APLCA/6e-26/Neurocalcin OS=Aplysia californica PE=2 SV=2	cmy:102932018/8e-24/NCALD; neurocalcin delta; K19695 neurocalcin delta	SPAC18B11.04/1e-22/---	NA	NA
CL3702.Contig1_All	596	0.01	4.07	8.66888	1.35216e-07	9.92168e-07	Up	gi|556097003|gb|ESO85655.1|/1.64573e-19/hypothetical protein LOTGIDRAFT_210857 [Lottia gigantea]	NA	sp|Q8CDN9|LRRC9_MOUSE/9e-17/Leucine-rich repeat-containing protein 9 OS=Mus musculus GN=Lrrc9 PE=1 SV=2	loa:LOAG_00522/5e-07/leucine Rich Repeat family protein; K17550 protein phosphatase 1 regulatory subunit 7	SPAC4A8.12c/2e-06/---	NA	NA
Unigene43214_All	382	0.01	4.07	8.66888	6.60358e-05	0.000346967	Up	NA	NA	NA	NA	NA	NA	NA
CL5032.Contig2_All	1004	0.01	4.06	8.66534	1.12792e-12	1.21839e-11	Up	gi|405961572|gb|EKC27356.1|/7.67554e-06/Proline-rich transmembrane protein 1 [Crassostrea gigas]	NA	sp|Q4R532|SYNG1_MACFA/8e-06/Synapse differentiation-inducing gene protein 1 OS=Macaca fascicularis GN=SYNDIG1 PE=2 SV=1	NA	NA	NA	NA
CL2828.Contig2_All	1204	0.01	4.05	8.66178	4.59492e-15	5.71597e-14	Up	gi|405976719|gb|EKC41215.1|/2.92915e-37/Tctex1 domain-containing protein 1 [Crassostrea gigas]	NA	sp|Q9D5I4|TC1D1_MOUSE/1e-17/Tctex1 domain-containing protein 1 OS=Mus musculus GN=Tctex1d1 PE=2 SV=1	nve:NEMVE_v1g242105/4e-12/hypothetical protein ; K06085 synovial sarcoma, X breakpoint 2 interacting protein	NA	PTHR21255/2.6E-37/--	NA
Unigene33238_All	385	0.01	4.03	8.65464	6.60358e-05	0.000346876	Up	gi|402594201|gb|EJW88127.1|/1.04107e-06/hypothetical protein WUBG_00958 [Wuchereria bancrofti]	gi|295681575|gb|AC213346.7|/1e-20/Pongo abelii BAC clone CH276-507I11 from chromosome 19, complete sequence	sp|B4K982|LST2_DROMO/2e-07/Lateral signaling target protein 2 homolog OS=Drosophila mojavensis GN=GI24295 PE=3 SV=1	soc:105207745/3e-06/la-related protein CG11505; K18763 la-related protein 4	NA	NA	NA
CL3081.Contig7_All	2031	0.01	4.03	8.65464	1.60704e-25	3.17554e-24	Up	gi|405951047|gb|EKC18994.1|/2.80137e-172/Cyclin-L1 [Crassostrea gigas]	gi|617479083|ref|XM_007576214.1|/1e-11/PREDICTED: Poecilia formosa cyclin L1 (ccnl1), mRNA	sp|Q9UK58|CCNL1_HUMAN/4e-119/Cyclin-L1 OS=Homo sapiens GN=CCNL1 PE=1 SV=1	ame:410174/2e-17/CycT, GB13539; cyclin T; K15188 cyclin T	SPAC1296.05c/4e-20/---	PTHR10026/3.6E-101/--	NA
CL2321.Contig2_All	1482	0.01	4	8.64386	2.377e-18	3.49639e-17	Up	NA	NA	NA	NA	NA	NA	NA
Unigene41030_All	412	0.01	4	8.64386	3.31916e-05	0.000182372	Up	NA	NA	NA	NA	NA	NA	NA
CL5324.Contig2_All	404	0.01	4	8.64386	6.60358e-05	0.000346093	Up	NA	NA	NA	NA	NA	NA	NA
CL2074.Contig8_All	1195	0.01	3.99	8.64024	9.14172e-15	1.11852e-13	Up	gi|291239071|ref|XP_002739449.1|/2.46308e-121/PREDICTED: glutathione S-transferase omega-like 2-like [Saccoglossus kowalevskii]	NA	NA	crg:105321344/5e-122/glutathione S-transferase omega-like 2; K07393 putative glutathione S-transferase	ZyqjG/8e-99/---	PS50405/10.695/Soluble glutathione S-transferase C-terminal domain profile.	NA
Unigene47539_All	509	0.01	3.99	8.64024	2.1185e-06	1.3732e-05	Up	NA	NA	NA	NA	NA	NA	NA
Unigene37038_All	436	0.01	3.99	8.64024	1.66832e-05	9.56489e-05	Up	NA	NA	NA	NA	NA	NA	NA
CL3788.Contig1_All	2302	0.01	3.99	8.64024	1.65397e-28	3.62586e-27	Up	gi|405971632|gb|EKC36458.1|/2.36434e-130/Golgi reassembly-stacking protein 2 [Crassostrea gigas]	gi|524885712|ref|XM_005099404.1|/7e-14/PREDICTED: Aplysia californica Golgi reassembly-stacking protein 2-like (LOC101864228), mRNA	sp|Q9R064|GORS2_RAT/2e-109/Golgi reassembly-stacking protein 2 OS=Rattus norvegicus GN=Gorasp2 PE=1 SV=3	ocu:100356313/2e-11/FMN2; formin-2; K02184 formin 2	SPAC1D4.02c/6e-29/---	PTHR12893/6.9E-152/--	NA
CL5406.Contig1_All	550	0.01	3.99	8.64024	1.06483e-06	7.10608e-06	Up	NA	NA	NA	NA	NA	NA	NA
Unigene37231_All	452	0.01	3.97	8.633	1.66832e-05	9.5658e-05	Up	NA	NA	NA	NA	NA	NA	NA
Unigene31854_All	464	0.01	3.96	8.62936	8.3855e-06	4.99815e-05	Up	NA	NA	NA	NA	NA	NA	NA
Unigene44511_All	562	0.01	3.95	8.62571	5.35216e-07	3.69269e-06	Up	NA	NA	NA	NA	NA	NA	NA
CL304.Contig1_All	1117	0.01	3.94	8.62205	1.43228e-13	1.63101e-12	Up	gi|405951464|gb|EKC19374.1|/2.14046e-47/hypothetical protein CGI_10008698 [Crassostrea gigas]	NA	sp|P58505|CU058_HUMAN/1e-10/Uncharacterized protein C21orf58 OS=Homo sapiens GN=C21orf58 PE=2 SV=2	NA	NA	PF15248/8.8E-17/Domain of unknown function (DUF4587)	NA
Unigene36648_All	442	0.01	3.93	8.61839	1.66832e-05	9.57126e-05	Up	gi|405957656|gb|EKC23854.1|/2.75789e-52/Dynein beta chain, ciliary [Crassostrea gigas]	NA	sp|P23098|DYHC_TRIGR/6e-12/Dynein beta chain, ciliary OS=Tripneustes gratilla PE=1 SV=1	crg:105343954/5e-53/dynein beta chain, ciliary-like; K10408 dynein heavy chain, axonemal	NA	PTHR10676:SF253/1.6E-49/--	NA
CL656.Contig13_All	3382	0.01	3.92	8.61471	2.35654e-41	7.36364e-40	Up	gi|524913305|ref|XP_005111484.1|/4.9263e-175/PREDICTED: serine/threonine-protein kinase 25-like isoform X4 [Aplysia californica]	gi|157104976|ref|XM_001648608.1|/1e-25/Aedes aegypti serine/threonine protein kinase partial mRNA	sp|Q9Y6E0|STK24_HUMAN/9e-139/Serine/threonine-protein kinase 24 OS=Homo sapiens GN=STK24 PE=1 SV=1	crg:105323719/3e-160/serine/threonine-protein kinase 24-like; K08838 serine/threonine-protein kinase 24/25/MST4 [EC:2.7.11.1]	YAR019c/2e-40/---	PTHR24361/4.0E-226/--	NA
CL844.Contig8_All	8693	0.01	3.92	8.61471	1.75698e-106	1.49029e-104	Up	gi|405961963|gb|EKC27690.1|/0/Spectrin beta chain [Crassostrea gigas]	gi|524867756|ref|XM_005090629.1|/3e-99/PREDICTED: Aplysia californica spectrin beta chain-like (LOC101859991), transcript variant X6, mRNA	sp|Q00963|SPTCB_DROME/0.0/Spectrin beta chain OS=Drosophila melanogaster GN=beta-Spec PE=1 SV=2	crg:105340614/0.0/spectrin beta chain-like; K06115 spectrin beta	SPAC15A10.08/7e-69/---	SM00033/2.1E-22/Calponin homology domain	NA
Unigene43133_All	443	0.01	3.92	8.61471	1.66832e-05	9.55399e-05	Up	NA	NA	NA	NA	NA	NA	NA
CL281.Contig2_All	483	0.01	3.91	8.61102	8.3855e-06	5.00706e-05	Up	NA	gi|73746132|gb|DQ108638.1|/3e-06/Nodipecten subnodosus clone NsubA266 microsatellite sequence	NA	NA	NA	NA	NA
Unigene34243_All	395	0.01	3.91	8.61102	6.60358e-05	0.000346786	Up	NA	NA	NA	NA	NA	NA	NA
Unigene31945_All	396	0.01	3.9	8.60733	6.60358e-05	0.000347058	Up	NA	gi|193734852|gb|EU623933.1|/1e-08/Argopecten irradians clone HWDD051 microsatellite sequence	NA	NA	NA	NA	NA
Unigene17950_All	644	0.01	3.88	8.59991	6.7964e-08	5.13052e-07	Up	gi|297302693|ref|XP_002806043.1|/9.81565e-11/PREDICTED: hypothetical protein LOC100425147, partial [Macaca mulatta]	gi|532077214|ref|XM_005324334.1|/9e-29/PREDICTED: Spermophilus tridecemlineatus phospholipase C-like 1 (Plcl1), mRNA	sp|Q6ZRP5|YD019_HUMAN/2e-06/Putative uncharacterized protein FLJ46204 OS=Homo sapiens PE=5 SV=2	NA	NA	NA	NA
Unigene41378_All	448	0.01	3.87	8.59619	1.66832e-05	9.55853e-05	Up	NA	NA	NA	NA	NA	NA	NA
Unigene44680_All	549	0.01	3.86	8.59246	1.06483e-06	7.11316e-06	Up	NA	NA	NA	NA	NA	NA	NA
Unigene32787_All	425	0.01	3.86	8.59246	3.31916e-05	0.00018224	Up	NA	NA	NA	NA	NA	NA	NA
CL4046.Contig2_All	1368	0.01	3.82	8.57743	2.93278e-16	3.89068e-15	Up	gi|405950578|gb|EKC18557.1|/8.20916e-103/hypothetical protein CGI_10011804 [Crassostrea gigas]	NA	sp|P25023|BKRB2_RAT/1e-10/B2 bradykinin receptor OS=Rattus norvegicus GN=Bdkrb2 PE=1 SV=4	crg:105341331/2e-54/probable G-protein coupled receptor 139; K08428 G protein-coupled receptor 139	NA	PF00001/5.0E-17/7 transmembrane receptor (rhodopsin family)	NA
CL3671.Contig1_All	1223	0.01	3.81	8.57365	1.81877e-14	2.17891e-13	Up	gi|405963792|gb|EKC29338.1|/1.93776e-44/hypothetical protein CGI_10010418 [Crassostrea gigas]	NA	NA	NA	NA	NA	NA
Unigene37591_All	484	0.01	3.77	8.55842	8.3855e-06	5.00805e-05	Up	gi|405962584|gb|EKC28247.1|/9.13707e-38/Tenascin-X [Crassostrea gigas]	NA	sp|Q96GP6|SREC2_HUMAN/4e-22/Scavenger receptor class F member 2 OS=Homo sapiens GN=SCARF2 PE=1 SV=4	crg:105333895/4e-32/uncharacterized LOC105333895; K18032 receptor-type tyrosine-protein phosphatase A [EC:3.1.3.48]	NA	NA	NA
CL3215.Contig3_All	4294	0.01	3.77	8.55842	1.29129e-50	5.0145e-49	Up	gi|405967244|gb|EKC32428.1|/0/Ankyrin-3 [Crassostrea gigas]	NA	sp|Q12955|ANK3_HUMAN/5e-19/Ankyrin-3 OS=Homo sapiens GN=ANK3 PE=1 SV=3	umr:103667740/3e-19/ANK3; ankyrin 3, node of Ranvier (ankyrin G); K10380 ankyrin	FN0178/3e-11/---	PS50297/37.931/Ankyrin repeat region circular profile.	NA
CL254.Contig2_All	666	0.01	3.75	8.55075	6.7964e-08	5.12924e-07	Up	gi|213389531|gb|ABB71675.2|/1.18287e-33/C-type lectin D1 [Azumapecten farreri]	gi|213389530|gb|DQ209292.2|/2e-14/Chlamys farreri C-type lectin D1 mRNA, complete cds	sp|P27471|KLRBA_RAT/6e-08/Killer cell lectin-like receptor subfamily B member 1A OS=Rattus norvegicus GN=Klrb1a PE=1 SV=1	crg:105338086/6e-12/macrophage mannose receptor 1-like; K06560 mannose receptor, C type	NA	NA	NA
CL1663.Contig1_All	505	0.01	3.75	8.55075	8.3855e-06	4.99864e-05	Up	NA	NA	NA	NA	NA	NA	NA
CL1653.Contig1_All	4866	0.01	3.73	8.54303	1.3678e-56	5.92596e-55	Up	gi|505847893|ref|XP_004617407.1|/1.18299e-23/PREDICTED: caspase recruitment domain-containing protein 11 [Sorex araneus]	NA	sp|Q9BXL7|CAR11_HUMAN/2e-20/Caspase recruitment domain-containing protein 11 OS=Homo sapiens GN=CARD11 PE=1 SV=3	acs:100565989/2e-23/card11; caspase recruitment domain family, member 11; K07367 caspase recruitment domain-containing protein 11	aq_629/1e-08/---	PF00619/3.4E-14/Caspase recruitment domain	NA
CL3073.Contig3_All	4190	0.01	3.72	8.53916	8.008e-49	2.97198e-47	Up	gi|405951097|gb|EKC19039.1|/0/Delta-like protein 1 [Crassostrea gigas]	gi|543345626|ref|XM_005518569.1|/3e-11/PREDICTED: Pseudopodoces humilis delta-like 1 (Drosophila) (DLL1), mRNA	sp|P10041|DL_DROME/4e-174/Neurogenic locus protein delta OS=Drosophila melanogaster GN=Dl PE=1 SV=2	crg:105325787/0.0/delta-like protein 1; K06051 delta; K06816 golgi apparatus protein 1	NA	PS01187/-/Calcium-binding EGF-like domain signature.	NA
CL3148.Contig2_All	892	0.01	3.71	8.53528	2.76872e-10	2.54149e-09	Up	NA	NA	NA	NA	NA	NA	NA
CL3108.Contig1_All	744	0.01	3.7	8.53138	1.71703e-08	1.37099e-07	Up	NA	NA	NA	NA	NA	NA	NA
Unigene47974_All	390	0.01	3.69	8.52748	0.00013138	0.000656715	Up	NA	NA	NA	NA	NA	NA	NA
Unigene43139_All	391	0.01	3.68	8.52356	0.00013138	0.000658133	Up	NA	NA	NA	NA	NA	NA	NA
Unigene46366_All	601	0.01	3.67	8.51964	5.35216e-07	3.69396e-06	Up	gi|443704529|gb|ELU01546.1|/3.29864e-23/hypothetical protein CAPTEDRAFT_118359 [Capitella teleta]	NA	sp|Q8BGN3|ENPP6_MOUSE/4e-24/Ectonucleotide pyrophosphatase/phosphodiesterase family member 6 OS=Mus musculus GN=Enpp6 PE=2 SV=1	crg:105318010/1e-25/ectonucleotide pyrophosphatase/phosphodiesterase family member 6-like; K08743 ectonucleotide pyrophosphatase/phosphodiesterase family member 6 [EC:3.1.4.-]	CC1277/1e-15/---	PF01663/1.8E-4/Type I phosphodiesterase / nucleotide pyrophosphatase	biological_process:GO:0019695//choline metabolic process;cellular_component:GO:0005886//plasma membrane;molecular_function:GO:0004114//3',5'-cyclic-nucleotide phosphodiesterase activity;GO:0052712//inositol phosphosphingolipid phospholipase activity;GO:0008889//glycerophosphodiester phosphodiesterase activity;
Unigene42134_All	470	0.01	3.67	8.51964	1.66832e-05	9.56853e-05	Up	NA	NA	NA	NA	NA	NA	NA
Unigene36073_All	470	0.01	3.67	8.51964	1.66832e-05	9.56125e-05	Up	gi|260796529|ref|XP_002593257.1|/3.39894e-42/hypothetical protein BRAFLDRAFT_59748 [Branchiostoma floridae] &gt;gi|229278481|gb|EEN49268.1| hypothetical protein BRAFLDRAFT_59748 [Branchiostoma floridae]	gi|611982793|ref|XM_001375500.3|/3e-06/PREDICTED: Monodelphis domestica calmodulin 2 (phosphorylase kinase, delta) (CALM2), mRNA	sp|Q7T3T2|CALM_EPIAK/5e-43/Calmodulin OS=Epinephelus akaara GN=calm PE=2 SV=3	crg:105334733/5e-42/calmodulin; K02183 calmodulin	SPAC3A12.14/2e-36/---	PS50222/15.685/EF-hand calcium-binding domain profile.	molecular_function:GO:0005509//calcium ion binding;
CL2470.Contig1_All	1347	0.01	3.65	8.51175	2.30956e-15	2.91513e-14	Up	gi|392902288|ref|NP_001255943.1|/2.16171e-23/Protein CLEC-199, isoform d [Caenorhabditis elegans] &gt;gi|285310534|emb|CBJ25058.1| Protein CLEC-199, isoform d [Caenorhabditis elegans]	gi|193734852|gb|EU623933.1|/4e-14/Argopecten irradians clone HWDD051 microsatellite sequence	sp|Q05049|MUC1_XENLA/3e-18/Integumentary mucin C.1 (Fragment) OS=Xenopus laevis PE=2 SV=1	xtr:100493286/9e-17/muc2; mucin 2, oligomeric mucus/gel-forming; K10955 intestinal mucin-2	YKR013w/1e-08/---	NA	NA
CL442.Contig1_All	1246	0.01	3.64	8.50779	3.6185e-14	4.25472e-13	Up	gi|556112893|gb|ESP01545.1|/5.26437e-37/hypothetical protein LOTGIDRAFT_200298, partial [Lottia gigantea]	NA	NA	NA	RSp0696/2e-26/---	PTHR11601/5.5E-57/--	NA
CL2649.Contig4_All	2351	0.01	3.64	8.50779	1.02572e-26	2.1272e-25	Up	gi|405953213|gb|EKC20918.1|/2.80523e-94/Gamma-aminobutyric acid receptor subunit gamma-2 [Crassostrea gigas]	NA	sp|Q5JXX5|GLRA4_HUMAN/3e-12/Glycine receptor subunit alpha-4 OS=Homo sapiens GN=GLRA4 PE=2 SV=3	asn:102376195/3e-12/GABRB1; gamma-aminobutyric acid (GABA) A receptor, beta 1; K05181 gamma-aminobutyric acid receptor subunit beta	NA	PF02932/3.4E-7/Neurotransmitter-gated ion-channel transmembrane region	NA
CL977.Contig1_All	5638	0.01	3.63	8.50383	4.64806e-64	2.29767e-62	Up	gi|405950946|gb|EKC18900.1|/7.78608e-51/Phospholipase A2 inhibitor subunit B [Crassostrea gigas]	NA	sp|Q9Z0L0|TPBG_MOUSE/1e-12/Trophoblast glycoprotein OS=Mus musculus GN=Tpbg PE=1 SV=3	api:100575453/6e-13/peroxidasin homolog; K16351 netrin-G2 ligand; K16359 netrin-G2	NA	PF13855/1.1E-7/Leucine rich repeat	NA
CL437.Contig2_All	1611	0.01	3.62	8.49985	4.7291e-18	6.85089e-17	Up	gi|573908651|ref|XP_006642044.1|/1.99322e-35/PREDICTED: E3 ubiquitin-protein ligase MIB2-like [Lepisosteus oculatus]	NA	sp|Q5ZIJ9|MIB2_CHICK/7e-34/E3 ubiquitin-protein ligase MIB2 OS=Gallus gallus GN=MIB2 PE=2 SV=1	crg:105326496/9e-36/E3 ubiquitin-protein ligase MIB2-like; K10645 E3 ubiquitin-protein ligase mind-bomb [EC:2.3.2.27]	RSc1788/1e-09/---	PS50088/9.912/Ankyrin repeat profile.	NA
CL1819.Contig1_All	718	0.01	3.61	8.49586	3.41608e-08	2.65828e-07	Up	NA	NA	NA	NA	NA	NA	NA
Unigene36844_All	505	0.01	3.6	8.49185	8.3855e-06	5.0026e-05	Up	NA	gi|345105464|gb|HQ225744.1|/5e-08/Argopecten irradians programmed cell death 4 (PDCD4) mRNA, complete cds	NA	NA	NA	NA	NA
Unigene42038_All	425	0.01	3.6	8.49185	6.60358e-05	0.000346243	Up	gi|556100588|gb|ESO89240.1|/1.03613e-22/hypothetical protein LOTGIDRAFT_154331 [Lottia gigantea]	NA	NA	NA	NA	NA	NA
CL951.Contig1_All	399	0.01	3.59	8.48784	0.00013138	0.000657151	Up	NA	NA	NA	NA	NA	NA	NA
CL2500.Contig1_All	781	0.01	3.59	8.48784	8.63036e-09	7.06693e-08	Up	gi|395519213|ref|XP_003763745.1|/9.24828e-29/PREDICTED: phosphatidylinositol-glycan biosynthesis class X protein [Sarcophilus harrisii]	NA	sp|Q99LV7|PIGX_MOUSE/1e-27/Phosphatidylinositol-glycan biosynthesis class X protein OS=Mus musculus GN=Pigx PE=2 SV=2	crg:105320041/1e-34/phosphatidylinositol-glycan biosynthesis class X protein-like; K07541 phosphatidylinositol glycan, class X	NA	SM00780/1.3E-12/PIG-X / PBN1	NA
Unigene39434_All	562	0.01	3.57	8.47978	2.1185e-06	1.37261e-05	Up	gi|443721116|gb|ELU10564.1|/6.78266e-06/hypothetical protein CAPTEDRAFT_194032 [Capitella teleta]	NA	NA	NA	NA	NA	NA
Unigene32831_All	483	0.01	3.56	8.47573	1.66832e-05	9.56944e-05	Up	NA	NA	NA	NA	NA	NA	NA
Unigene46111_All	484	0.01	3.55	8.47168	1.66832e-05	9.57308e-05	Up	gi|513202261|ref|XP_004944029.1|/3.97057e-25/PREDICTED: alpha-mannosidase 2x isoform X10 [Gallus gallus]	NA	sp|Q8BRK9|MA2A2_MOUSE/2e-25/Alpha-mannosidase 2x OS=Mus musculus GN=Man2a2 PE=2 SV=2	gga:415585/1e-25/MAN2A2; mannosidase, alpha, class 2A, member 2; K01231 alpha-mannosidase II [EC:3.2.1.114]	NA	PTHR11607/5.5E-41/--	NA
Unigene34053_All	458	0.01	3.54	8.46761	3.31916e-05	0.000182589	Up	NA	NA	NA	NA	NA	NA	NA
Unigene36476_All	512	0.01	3.54	8.46761	8.3855e-06	4.99963e-05	Up	gi|405951379|gb|EKC19297.1|/2.41414e-24/Amidase [Crassostrea gigas]	NA	NA	NA	NA	PS50966/8.283/Zinc finger SWIM-type profile.	NA
CL796.Contig2_All	948	0.01	3.53	8.46352	1.39165e-10	1.3081e-09	Up	gi|405977313|gb|EKC41771.1|/4.69385e-18/hypothetical protein CGI_10021637 [Crassostrea gigas]	NA	NA	NA	NA	NA	NA
Unigene39852_All	405	0.01	3.53	8.46352	0.00013138	0.000658297	Up	NA	NA	NA	NA	NA	NA	NA
Unigene43280_All	487	0.01	3.53	8.46352	1.66832e-05	9.55671e-05	Up	NA	NA	NA	NA	NA	NA	NA
Unigene37092_All	982	0.01	3.5	8.45121	6.99486e-11	6.73015e-10	Up	NA	NA	NA	NA	NA	NA	NA
Unigene41414_All	572	0.01	3.5	8.45121	2.1185e-06	1.37217e-05	Up	gi|556111452|gb|ESP00104.1|/1.53567e-08/hypothetical protein LOTGIDRAFT_158334 [Lottia gigantea]	NA	NA	NA	NA	PF14559/1.3E-5/Tetratricopeptide repeat	NA
CL1260.Contig1_All	7747	0.01	3.5	8.45121	1.13115e-84	7.40687e-83	Up	gi|405976979|gb|EKC41453.1|/1.17072e-145/Serine/threonine-protein kinase TBK1 [Crassostrea gigas]	gi|193734852|gb|EU623933.1|/2e-07/Argopecten irradians clone HWDD051 microsatellite sequence	sp|Q6DFJ6|TBK1_XENLA/6e-106/Serine/threonine-protein kinase TBK1 OS=Xenopus laevis GN=tbk1 PE=2 SV=1	crg:105318588/0.0/serine/threonine-protein kinase TBK1-like; K05410 TANK-binding kinase 1 [EC:2.7.11.10]	PA0074_1/2e-18/---	SM00220/8.8E-37/Serine/Threonine protein kinases, catalytic domain	NA
Unigene43465_All	409	0.01	3.49	8.44708	0.00013138	0.000657642	Up	gi|405975734|gb|EKC40282.1|/6.74375e-54/Collagen alpha-4(VI) chain [Crassostrea gigas]	NA	sp|P15502|ELN_HUMAN/8e-10/Elastin OS=Homo sapiens GN=ELN PE=1 SV=3	crg:105329078/3e-20/uncharacterized LOC105329078; K05719 integrin beta 1; K06238 collagen, type VI, alpha	Rv3876/4e-07/---	NA	NA
Unigene32244_All	410	0.01	3.48	8.44294	0.00013138	0.000657205	Up	NA	gi|577007626|emb|CU928046.8|/2e-07/Zebrafish DNA sequence from clone CH73-302A4 in linkage group 14, complete sequence	NA	NA	NA	NA	NA
CL2938.Contig1_All	4721	0.01	3.48	8.44294	3.2623e-51	1.28171e-49	Up	gi|405959083|gb|EKC25151.1|/0/Metabotropic glutamate receptor 5 [Crassostrea gigas]	NA	sp|P41594|GRM5_HUMAN/8e-43/Metabotropic glutamate receptor 5 OS=Homo sapiens GN=GRM5 PE=1 SV=2	crg:105333893/2e-53/uncharacterized LOC105333893; K04608 metabotropic glutamate receptor 6/7/8	mlr7182/4e-06/---	PR00248/1.59E-20/Metabotropic glutamate GPCR signature	NA
Unigene34861_All	411	0.01	3.47	8.43879	0.00013138	0.000656987	Up	gi|405975734|gb|EKC40282.1|/1.50235e-53/Collagen alpha-4(VI) chain [Crassostrea gigas]	NA	sp|Q04164|SAS_DROME/7e-08/Putative epidermal cell surface receptor OS=Drosophila melanogaster GN=sas PE=2 SV=2	crg:105329078/7e-25/uncharacterized LOC105329078; K05719 integrin beta 1; K06238 collagen, type VI, alpha	NA	NA	NA
Unigene31384_All	1651	0.01	3.46	8.43463	9.40866e-18	1.34205e-16	Up	gi|405964318|gb|EKC29816.1|/3.27296e-120/Cytochrome P450 2C8 [Crassostrea gigas]	NA	sp|O54750|CP2J6_MOUSE/3e-93/Cytochrome P450 2J6 OS=Mus musculus GN=Cyp2j6 PE=2 SV=2	crg:105333814/8e-114/cytochrome P450 2C14-like; K17854 cytochrome P450, family 2, subfamily K	alr1450/6e-21/---	PF00067/4.0E-122/Cytochrome P450	NA
Unigene31995_All	414	0.01	3.44	8.42626	0.00013138	0.000657478	Up	NA	NA	NA	NA	NA	NA	NA
Unigene44886_All	499	0.01	3.43	8.42206	1.66832e-05	9.57217e-05	Up	gi|524866882|ref|XP_005090257.1|/3.15713e-10/PREDICTED: carbohydrate sulfotransferase 15-like [Aplysia californica]	NA	sp|Q91XQ5|CHSTF_MOUSE/1e-06/Carbohydrate sulfotransferase 15 OS=Mus musculus GN=Chst15 PE=2 SV=1	crg:105320595/2e-07/carbohydrate sulfotransferase 15-like; K08106 N-acetylgalactosamine 4-sulfate 6-O-sulfotransferase [EC:2.8.2.33]	NA	NA	NA
Unigene43686_All	2257	0.01	3.43	8.42206	2.51784e-24	4.7541e-23	Up	gi|585703136|ref|XP_006823195.1|/4.49168e-25/PREDICTED: uncharacterized protein LOC102803471 [Saccoglossus kowalevskii]	NA	NA	NA	NA	PF00632/2.8E-9/HECT-domain (ubiquitin-transferase)	NA
CL164.Contig1_All	556	0.01	3.42	8.41785	4.21482e-06	2.62103e-05	Up	gi|426385477|ref|XP_004059238.1|/1.31953e-06/PREDICTED: uncharacterized protein LOC101128228 [Gorilla gorilla gorilla]	NA	NA	acs:100557596/6e-06/uncharacterized LOC100557596; K09640 transmembrane protease, serine 9 [EC:3.4.21.-]	NA	NA	NA
CL2534.Contig4_All	2198	0.01	3.42	8.41785	1.98279e-23	3.61591e-22	Up	gi|524865346|ref|XP_005089503.1|/0/PREDICTED: galactocerebrosidase-like isoform X1 [Aplysia californica]	gi|524867933|ref|XM_005090717.1|/2e-10/PREDICTED: Aplysia californica galactocerebrosidase-like (LOC101859299), mRNA	sp|B5X3C1|GALC_SALSA/0.0/Galactocerebrosidase OS=Salmo salar GN=galc PE=2 SV=1	dre:406385/0.0/galcb, galc, wu:fi04e07, zgc:56444; galactosylceramidase b (EC:3.2.1.46); K01202 galactosylceramidase [EC:3.2.1.46]	NA	PTHR15172:SF1/0.0/--	NA
Unigene45200_All	634	0.01	3.41	8.41363	1.06483e-06	7.11238e-06	Up	NA	NA	NA	NA	NA	NA	NA
CL89.Contig8_All	7747	0.02	6.74	8.3966	3.25718e-160	4.30776e-158	Up	gi|405959303|gb|EKC25355.1|/0/Titin [Crassostrea gigas]	NA	sp|A2ASS6|TITIN_MOUSE/4e-45/Titin OS=Mus musculus GN=Ttn PE=1 SV=1	oaa:103171044/9e-45/TTN; titin; K12567 titin [EC:2.7.11.1]	ECU09g0290/1e-17/---	SM00409/9.8E-6/Immunoglobulin	NA
Unigene43755_All	452	0.01	3.36	8.39232	6.60358e-05	0.000346665	Up	NA	NA	NA	NA	NA	NA	NA
Unigene47257_All	483	0.01	3.34	8.3837	3.31916e-05	0.000182839	Up	NA	NA	NA	NA	NA	NA	NA
Unigene35660_All	482	0.01	3.34	8.3837	3.31916e-05	0.000182672	Up	NA	NA	NA	NA	NA	NA	NA
Unigene41176_All	426	0.01	3.33	8.37938	0.00013138	0.000658461	Up	gi|187030944|emb|CAP29936.1|/1.22963e-07/Protein CBG10573 [Caenorhabditis briggsae]	NA	NA	mcc:100424287/9e-07/zinc finger protein 670-like; K09228 KRAB domain-containing zinc finger protein	NA	NA	NA
Unigene37308_All	426	0.01	3.33	8.37938	0.00013138	0.000658188	Up	NA	NA	NA	NA	NA	NA	NA
Unigene34890_All	687	0.01	3.32	8.37504	2.69016e-07	1.91748e-06	Up	NA	NA	NA	NA	NA	NA	NA
Unigene47748_All	1292	0.01	3.32	8.37504	1.43228e-13	1.63039e-12	Up	gi|405955512|gb|EKC22600.1|/9.77665e-42/hypothetical protein CGI_10001979 [Crassostrea gigas]	NA	NA	NA	NA	NA	NA
CL4078.Contig2_All	459	0.01	3.3	8.36632	6.60358e-05	0.000346907	Up	NA	NA	NA	NA	NA	NA	NA
Unigene31459_All	1913	0.01	3.29	8.36194	1.51715e-19	2.35936e-18	Up	gi|524886662|ref|XP_005099924.1|/1.84895e-93/PREDICTED: small glutamine-rich tetratricopeptide repeat-containing protein alpha-like isoform X1 [Aplysia californica] &gt;gi|524886664|ref|XP_005099925.1| PREDICTED: small glutamine-rich tetratricopeptide repeat-containing protein alpha-like isoform X2 [Aplysia californica]	NA	sp|O43765|SGTA_HUMAN/1e-55/Small glutamine-rich tetratricopeptide repeat-containing protein alpha OS=Homo sapiens GN=SGTA PE=1 SV=1	crg:105328341/5e-102/small glutamine-rich tetratricopeptide repeat-containing protein beta-like; K06758 L1 cell adhesion molecule like protein; K16365 small glutamine-rich tetratricopeptide repeat-containing protein alpha	SPAC17G6.19c/3e-38/---	PTHR22904:SF301/5.4E-81/--	NA
CL1583.Contig2_All	1258	0.01	3.28	8.35755	5.66928e-13	6.22547e-12	Up	gi|405967666|gb|EKC32802.1|/1.00905e-144/hypothetical protein CGI_10017196 [Crassostrea gigas]	NA	NA	NA	NA	PTHR10992:SF752/1.5E-43/--	NA
Unigene33393_All	782	0.01	3.28	8.35755	3.41608e-08	2.65452e-07	Up	NA	NA	NA	NA	NA	NA	NA
Unigene31292_All	2066	0.01	3.27	8.35315	4.86718e-21	8.06401e-20	Up	gi|405951527|gb|EKC19432.1|/2.54475e-120/Inositol-trisphosphate 3-kinase C [Crassostrea gigas]	NA	sp|P42335|IP3KB_RAT/3e-60/Inositol-trisphosphate 3-kinase B OS=Rattus norvegicus GN=Itpkb PE=1 SV=3	crg:105335845/5e-121/inositol-trisphosphate 3-kinase A-like; K00911 1D-myo-inositol-triphosphate 3-kinase [EC:2.7.1.127]	NA	PTHR12400:SF42/4.5E-110/--	NA
CL927.Contig2_All	1260	0.01	3.27	8.35315	5.66928e-13	6.22207e-12	Up	gi|556101335|gb|ESO89987.1|/4.92989e-83/hypothetical protein LOTGIDRAFT_178957 [Lottia gigantea]	NA	sp|Q16566|KCC4_HUMAN/2e-72/Calcium/calmodulin-dependent protein kinase type IV OS=Homo sapiens GN=CAMK4 PE=1 SV=1	crg:105319871/1e-85/calcium/calmodulin-dependent protein kinase type IV-like; K05869 calcium/calmodulin-dependent protein kinase IV [EC:2.7.11.17]	SPAC14C4.03/5e-33/---	PS50011/45.008/Protein kinase domain profile.	NA
CL3816.Contig1_All	3628	0.01	3.27	8.35315	3.58736e-37	1.00533e-35	Up	gi|556098754|gb|ESO87406.1|/2.32807e-45/hypothetical protein LOTGIDRAFT_166554 [Lottia gigantea]	NA	sp|Q8BGT0|OSTM1_MOUSE/3e-25/Osteopetrosis-associated transmembrane protein 1 OS=Mus musculus GN=Ostm1 PE=1 SV=1	crg:105348537/2e-47/annexin A7-like; K17095 annexin A7/11	Cgl1939/1e-07/---	PF09777/5.8E-50/Osteopetrosis-associated transmembrane protein 1 precursor	NA
CL741.Contig3_All	1061	0.01	3.27	8.35315	6.99486e-11	6.72801e-10	Up	gi|405957497|gb|EKC23702.1|/4.31416e-10/Tripartite motif-containing protein 2 [Crassostrea gigas]	NA	NA	crg:105330329/2e-10/uncharacterized LOC105330329; K12035 tripartite motif-containing protein 71 [EC:2.3.2.27]	NA	PF00643/1.1E-7/B-box zinc finger	NA
Unigene47090_All	550	0.01	3.27	8.35315	8.3855e-06	4.99914e-05	Up	NA	NA	NA	NA	NA	PF00443/1.7E-9/Ubiquitin carboxyl-terminal hydrolase	NA
CL859.Contig1_All	2327	0.01	3.26	8.34873	9.96614e-24	1.8386e-22	Up	gi|405975242|gb|EKC39823.1|/3.45564e-137/Calponin-2 [Crassostrea gigas]	NA	sp|P37397|CNN3_RAT/9e-39/Calponin-3 OS=Rattus norvegicus GN=Cnn3 PE=1 SV=1	nvi:100123601/1e-19/mitogen-activated protein kinase kinase kinase 15; K04426 mitogen-activated protein kinase kinase kinase 5 [EC:2.7.11.25]	ECU03g1150/9e-10/---	PS51122/12.67/Calponin-like repeat profile.	NA
Unigene43391_All	555	0.01	3.24	8.33985	8.3855e-06	5.00111e-05	Up	NA	NA	NA	NA	NA	NA	NA
CL1048.Contig2_All	607	0.01	3.24	8.33985	4.21482e-06	2.61968e-05	Up	NA	NA	NA	NA	NA	NA	NA
Unigene46529_All	734	0.01	3.23	8.33539	1.35216e-07	9.91806e-07	Up	NA	NA	NA	NA	NA	NA	NA
Unigene36561_All	645	0.01	3.23	8.33539	1.06483e-06	7.10451e-06	Up	gi|405957917|gb|EKC24094.1|/1.14878e-43/Sodium- and chloride-dependent glycine transporter 2 [Crassostrea gigas]	NA	sp|Q99884|SC6A7_HUMAN/2e-38/Sodium-dependent proline transporter OS=Homo sapiens GN=SLC6A7 PE=2 SV=2	crg:105339780/3e-44/sodium- and chloride-dependent glycine transporter 2-like; K05038 solute carrier family 6 (neurotransmitter transporter, amino acid) member 5/7/9/14	VC2012/1e-19/---	PF00209/2.5E-48/Sodium:neurotransmitter symporter family	NA
Unigene38222_All	469	0.01	3.22	8.33092	6.60358e-05	0.000346213	Up	NA	NA	NA	NA	NA	NA	NA
Unigene44126_All	922	0.01	3.21	8.32643	2.18036e-09	1.87901e-08	Up	gi|556108328|gb|ESO96980.1|/2.20217e-33/hypothetical protein LOTGIDRAFT_115312, partial [Lottia gigantea]	gi|403221595|dbj|AP011947.1|/7e-12/Theileria orientalis strain Shintoku DNA, chromosome 2, complete genome	sp|O00370|LORF2_HUMAN/9e-14/LINE-1 retrotransposable element ORF2 protein OS=Homo sapiens PE=1 SV=1	NA	NA	PTHR19446/4.3E-19/--	NA
CL1769.Contig2_All	2510	0.01	3.2	8.32193	3.19726e-25	6.24621e-24	Up	gi|167538689|ref|XP_001751006.1|/4.34963e-08/hypothetical protein [Monosiga brevicollis MX1] &gt;gi|163770485|gb|EDQ84176.1| predicted protein [Monosiga brevicollis MX1]	NA	sp|Q05049|MUC1_XENLA/1e-06/Integumentary mucin C.1 (Fragment) OS=Xenopus laevis PE=2 SV=1	xtr:100498375/1e-06/mucin-2-like; K10955 intestinal mucin-2	NA	NA	NA
Unigene35052_All	501	0.01	3.2	8.32193	3.31916e-05	0.000182323	Up	NA	NA	NA	NA	NA	NA	NA
Unigene32988_All	1043	0.01	3.19	8.31741	1.39165e-10	1.3085e-09	Up	gi|405971268|gb|EKC36114.1|/7.35136e-31/Serine/threonine-protein kinase Sgk3 [Crassostrea gigas]	gi|556972430|ref|XM_005994359.1|/5e-16/PREDICTED: Latimeria chalumnae serum/glucocorticoid regulated kinase 2 (SGK2), mRNA	sp|Q6U1I9|SGK1_CHICK/9e-29/Serine/threonine-protein kinase Sgk1 OS=Gallus gallus GN=SGK1 PE=2 SV=1	crg:105331539/2e-31/serine/threonine-protein kinase Sgk1-like; K13304 serum/glucocorticoid-regulated kinase 3 [EC:2.7.11.1]	SPAC17G8.14c_2/5e-12/---	PTHR24356:SF134/2.8E-42/--	biological_process:GO:0018105//peptidyl-serine phosphorylation;GO:0035556//intracellular signal transduction;cellular_component:GO:0005622//intracellular;molecular_function:GO:0004674//protein serine/threonine kinase activity;GO:0005524//ATP binding;GO:0035091//phosphatidylinositol binding;
Unigene36764_All	474	0.01	3.18	8.31288	6.60358e-05	0.000346816	Up	gi|405972626|gb|EKC37386.1|/2.61937e-10/hypothetical protein CGI_10023858 [Crassostrea gigas]	NA	NA	NA	NA	PS50237/9.74/HECT domain profile.	NA
Unigene32502_All	475	0.01	3.17	8.30834	6.60358e-05	0.000346695	Up	NA	NA	NA	NA	NA	NA	NA
CL4268.Contig1_All	478	0.01	3.17	8.30834	6.60358e-05	0.000346363	Up	gi|556096412|gb|ESO85064.1|/5.99526e-10/hypothetical protein LOTGIDRAFT_221527 [Lottia gigantea]	NA	NA	spu:583590/2e-06/probable tubulin polyglutamylase TTLL9; K16603 tubulin polyglutamylase TTLL9 [EC:6.-.-.-]	NA	NA	NA
CL2536.Contig1_All	3740	0.01	3.16	8.30378	7.13716e-37	1.98262e-35	Up	gi|405970093|gb|EKC35028.1|/0/Tetratricopeptide repeat protein 18 [Crassostrea gigas]	gi|524900839|ref|XM_005106780.1|/1e-16/PREDICTED: Aplysia californica tetratricopeptide repeat protein 18-like (LOC101845872), transcript variant X4, mRNA	sp|Q5T0N1|TTC18_HUMAN/0.0/Tetratricopeptide repeat protein 18 OS=Homo sapiens GN=TTC18 PE=2 SV=3	api:100163982/4e-07/RNA polymerase-associated protein CTR9 homolog; K15176 RNA polymerase-associated protein CTR9	NA	PS50293/13.741/TPR repeat region circular profile.	NA
Unigene43723_All	537	0.01	3.16	8.30378	1.66832e-05	9.57399e-05	Up	NA	NA	NA	NA	NA	NA	NA
Unigene34882_All	447	0.01	3.16	8.30378	0.00013138	0.000657696	Up	gi|585662628|ref|XP_006816782.1|/1.11228e-48/PREDICTED: dynein heavy chain 17, axonemal-like [Saccoglossus kowalevskii]	NA	sp|Q96DT5|DYH11_HUMAN/2e-13/Dynein heavy chain 11, axonemal OS=Homo sapiens GN=DNAH11 PE=1 SV=3	crg:105343954/7e-69/dynein beta chain, ciliary-like; K10408 dynein heavy chain, axonemal	NA	PTHR10676:SF253/3.1E-59/--	NA
Unigene44474_All	537	0.01	3.16	8.30378	1.66832e-05	9.56034e-05	Up	gi|405968784|gb|EKC33817.1|/1.25359e-32/UMP-CMP kinase 2, mitochondrial [Crassostrea gigas]	NA	sp|Q3U5Q7|CMPK2_MOUSE/7e-28/UMP-CMP kinase 2, mitochondrial OS=Mus musculus GN=Cmpk2 PE=2 SV=2	crg:105328770/3e-33/UMP-CMP kinase 2, mitochondrial-like; K13809 UMP-CMP kinase 2, mitochondrial [EC:2.7.4.14]	NA	PTHR10344:SF2/5.8E-47/--	NA
Unigene32742_All	690	0.01	3.15	8.29921	5.35216e-07	3.69354e-06	Up	NA	NA	NA	NA	NA	NA	NA
Unigene44825_All	571	0.01	3.14	8.29462	8.3855e-06	5.00607e-05	Up	gi|405957495|gb|EKC23701.1|/1.21397e-13/Protocadherin gamma-A11 [Crassostrea gigas]	NA	sp|Q1LWL6|GSE1_DANRE/1e-07/Genetic suppressor element 1 OS=Danio rerio GN=gse1 PE=4 SV=1	ocu:100337740/8e-06/TCHH; trichohyalin; K18626 trichohyalin	aq_629/3e-06/---	NA	NA
CL679.Contig2_All	722	0.01	3.13	8.29002	5.35216e-07	3.69185e-06	Up	NA	NA	NA	NA	NA	NA	NA
Unigene38522_All	454	0.01	3.1	8.27612	0.00013138	0.000657915	Up	NA	NA	NA	NA	NA	NA	NA
Unigene33130_All	670	0.01	3.1	8.27612	1.06483e-06	7.10765e-06	Up	NA	NA	NA	NA	NA	NA	NA
Unigene31746_All	947	0.01	3.1	8.27612	2.18036e-09	1.8774e-08	Up	NA	gi|323510943|gb|HQ225752.1|/1e-10/Argopecten irradians clone AiDD105 microsatellite sequence	NA	NA	NA	NA	NA
Unigene33025_All	642	0.01	3.09	8.27146	2.1185e-06	1.37246e-05	Up	NA	NA	NA	NA	NA	NA	NA
Unigene41964_All	519	0.01	3.08	8.26679	3.31916e-05	0.000182489	Up	NA	NA	NA	NA	NA	NA	NA
CL240.Contig2_All	855	0.01	3.07	8.26209	3.41608e-08	2.65623e-07	Up	NA	NA	NA	NA	NA	NA	NA
CL5373.Contig2_All	551	0.01	3.07	8.26209	1.66832e-05	9.56216e-05	Up	NA	NA	NA	NA	NA	NA	NA
CL650.Contig1_All	2549	0.01	3.07	8.26209	1.26554e-24	2.41986e-23	Up	gi|405971277|gb|EKC36123.1|/4.71127e-127/Phosphatase and actin regulator 1 [Crassostrea gigas]	gi|611998650|ref|XM_007484661.1|/1e-09/PREDICTED: Monodelphis domestica phosphatase and actin regulator 2 (PHACTR2), transcript variant X6, mRNA	sp|Q6GLU8|PHAR1_XENLA/4e-83/Phosphatase and actin regulator 1 OS=Xenopus laevis GN=phactr1 PE=2 SV=1	hst:105189266/7e-99/phosphatase and actin regulator 4B; K17585 phosphatase and actin regulator 4	NA	PF02755/1.1E-6/RPEL repeat	NA
Unigene33164_All	553	0.01	3.06	8.25739	1.66832e-05	9.57672e-05	Up	NA	NA	NA	NA	NA	NA	NA
Unigene32174_All	460	0.01	3.05	8.25267	0.00013138	0.000658407	Up	NA	NA	NA	NA	NA	NA	NA
Unigene31624_All	622	0.01	3.03	8.24317	4.21482e-06	2.62157e-05	Up	gi|560138804|emb|CDJ82723.1|/5.48399e-40/Adenylate kinase domain containing protein [Haemonchus contortus]	gi|585178420|ref|XM_006740866.1|/1e-15/PREDICTED: Leptonychotes weddellii spectrin alpha chain, erythrocytic 1-like (LOC102739819), mRNA	sp|Q9Y6K8|KAD5_HUMAN/2e-32/Adenylate kinase isoenzyme 5 OS=Homo sapiens GN=AK5 PE=1 SV=2	crg:105334927/4e-49/adenylate kinase isoenzyme 5-like; K00939 adenylate kinase [EC:2.7.4.3]	YKL024c/6e-15/---	PTHR23359/9.8E-54/--	NA
CL4368.Contig1_All	2690	0.01	3.03	8.24317	1.60704e-25	3.17762e-24	Up	gi|556103943|gb|ESO92595.1|/9.39751e-41/hypothetical protein LOTGIDRAFT_233043 [Lottia gigantea]	NA	NA	NA	NA	NA	NA
Unigene32715_All	686	0.01	3.02	8.2384	1.06483e-06	7.10372e-06	Up	gi|556095158|gb|ESO83811.1|/2.54234e-103/hypothetical protein LOTGIDRAFT_207312 [Lottia gigantea]	gi|542195163|ref|XM_005472363.1|/8e-17/PREDICTED: Oreochromis niloticus aldehyde dehydrogenase 2 family (mitochondrial) (aldh2), transcript variant X2, mRNA	sp|Q8HYE4|AL1A1_MACFA/6e-96/Retinal dehydrogenase 1 OS=Macaca fascicularis GN=ALDH1A1 PE=2 SV=3	dre:116713/6e-96/aldh1a2, fb50h01, raldh2; aldehyde dehydrogenase 1 family, member A2 (EC:1.2.1.36); K07249 retinal dehydrogenase [EC:1.2.1.36]	SPAC9E9.09c/3e-79/---	PTHR11699/4.6E-158/--	biological_process:GO:0055114//oxidation-reduction process;molecular_function:GO:0001758//retinal dehydrogenase activity;GO:0004029//aldehyde dehydrogenase (NAD) activity;
Unigene31615_All	528	0.01	3.02	8.2384	3.31916e-05	0.00018219	Up	gi|556095158|gb|ESO83811.1|/1.1134e-70/hypothetical protein LOTGIDRAFT_207312 [Lottia gigantea]	gi|612037690|ref|XM_001373180.2|/3e-06/PREDICTED: Monodelphis domestica aldehyde dehydrogenase 1 family, member A6 (ALDH1A6), mRNA	sp|Q27640|ALDH_ENCBU/9e-58/Aldehyde dehydrogenase OS=Enchytraeus buchholzi GN=ALDH PE=2 SV=1	aga:AgaP_AGAP003578/9e-64/AGAP003578-PA; K00128 aldehyde dehydrogenase (NAD+) [EC:1.2.1.3]	SPAC9E9.09c/2e-50/---	PTHR11699:SF145/1.2E-106/--	biological_process:GO:0055114//oxidation-reduction process;molecular_function:GO:0001758//retinal dehydrogenase activity;GO:0004029//aldehyde dehydrogenase (NAD) activity;
Unigene44827_All	529	0.01	3.01	8.23362	3.31916e-05	0.000182689	Up	gi|405952886|gb|EKC20643.1|/1.56085e-56/hypothetical protein CGI_10005707 [Crassostrea gigas]	NA	NA	NA	NA	NA	NA
CL2726.Contig2_All	836	0.01	3.01	8.23362	6.7964e-08	5.13373e-07	Up	NA	NA	NA	NA	NA	NA	NA
Unigene43192_All	468	0.01	3	8.22882	0.00013138	0.000656824	Up	gi|607362048|gb|EZA56308.1|/4.02437e-35/Guanylate cyclase 32E [Cerapachys biroi]	NA	sp|P16067|ANPRB_RAT/1e-32/Atrial natriuretic peptide receptor 2 OS=Rattus norvegicus GN=Npr2 PE=1 SV=1	crg:105324420/1e-33/atrial natriuretic peptide receptor 2-like; K12324 atrial natriuretic peptide receptor B [EC:4.6.1.2]	YAR019c/2e-08/---	SM00219/0.001/Tyrosine kinase, catalytic domain	NA
CL4977.Contig1_All	979	0.01	2.99	8.224	4.3379e-09	3.63751e-08	Up	gi|405951089|gb|EKC19032.1|/1.51232e-83/Neuronal calcium sensor 2 [Crassostrea gigas]	NA	sp|P36609|NCS2_CAEEL/5e-63/Neuronal calcium sensor 2 OS=Caenorhabditis elegans GN=ncs-2 PE=2 SV=2	lcm:102359888/5e-47/neurocalcin-delta A-like; K19695 neurocalcin delta	SPAC18B11.04/3e-46/---	PTHR23055/8.0E-107/--	molecular_function:GO:0005509//calcium ion binding;
Unigene39942_All	567	0.01	2.98	8.21917	1.66832e-05	9.57581e-05	Up	NA	NA	NA	NA	NA	NA	NA
CL4622.Contig2_All	598	0.01	2.98	8.21917	8.3855e-06	5.00309e-05	Up	NA	NA	NA	NA	NA	NA	NA
CL4216.Contig5_All	2852	0.01	2.98	8.21917	1.02572e-26	2.12647e-25	Up	gi|405971234|gb|EKC36081.1|/0/Metastasis suppressor protein 1 [Crassostrea gigas]	gi|617427934|ref|XM_007560733.1|/3e-07/PREDICTED: Poecilia formosa MTSS1-like protein (LOC103143990), mRNA	sp|O43312|MTSS1_HUMAN/3e-121/Metastasis suppressor protein 1 OS=Homo sapiens GN=MTSS1 PE=1 SV=2	clv:102084808/1e-11/serine/arginine repetitive matrix protein 1-like; K13171 serine/arginine repetitive matrix protein 1	Rv3876/2e-06/---	PS51338/50.595/IMD domain profile.	NA
CL1048.Contig1_All	648	0.01	2.98	8.21917	4.21482e-06	2.61887e-05	Up	NA	NA	NA	NA	NA	NA	NA
CL2670.Contig1_All	925	0.01	2.97	8.21432	8.63036e-09	7.06981e-08	Up	NA	NA	NA	NA	NA	NA	NA
CL4104.Contig1_All	534	0.01	2.95	8.20457	6.60358e-05	0.000347088	Up	NA	NA	NA	NA	NA	NA	NA
Unigene33013_All	571	0.01	2.95	8.20457	1.66832e-05	9.56398e-05	Up	gi|405975067|gb|EKC39663.1|/1.77193e-33/hypothetical protein CGI_10025121 [Crassostrea gigas]	NA	sp|Q7Q297|WSCD_ANOGA/9e-27/WSCD family member AGAP003962 OS=Anopheles gambiae GN=AGAP003962 PE=3 SV=3	NA	NA	PTHR19297:SF85/2.0E-21/--	NA
Unigene39696_All	541	0.01	2.94	8.19967	3.31916e-05	0.000182206	Up	gi|405965743|gb|EKC31097.1|/8.18501e-27/hypothetical protein CGI_10028722 [Crassostrea gigas]	NA	NA	NA	NA	PF07776/7.2E-5/Zinc-finger associated domain (zf-AD)	NA
Unigene12206_All	640	0.01	2.93	8.19476	4.21482e-06	2.62076e-05	Up	gi|317411657|sp|B3RXR7.1|GUF1_TRIAD/3.54829e-77/RecName: Full=Translation factor GUF1 homolog, mitochondrial; AltName: Full=Elongation factor 4 homolog; Short=EF-4; AltName: Full=GTPase GUF1 homolog; AltName: Full=Ribosomal back-translocase; Flags: Precursor [Trichoplax adhaerens]	gi|573883568|ref|XM_006629879.1|/2e-08/PREDICTED: Lepisosteus oculatus translation factor GUF1, mitochondrial-like (LOC102682900), mRNA	sp|B3RXR7|GUF1_TRIAD/8e-79/Translation factor GUF1 homolog, mitochondrial OS=Trichoplax adhaerens GN=TRIADDRAFT_56304 PE=3 SV=1	lve:103072277/6e-49/translation factor GUF1 homolog, chloroplastic-like; K04771 serine protease Do [EC:3.4.21.107]	SPAC1B3.04c/4e-61/---	PS00301/-/GTP-binding elongation factors signature.	biological_process:GO:0045727//positive regulation of translation;cellular_component:GO:0005759//mitochondrial matrix;molecular_function:GO:0043022//ribosome binding;GO:0005525//GTP binding;GO:0003924//GTPase activity;
CL414.Contig3_All	3512	0.01	2.93	8.19476	2.1616e-32	5.31872e-31	Up	gi|405969360|gb|EKC34336.1|/4.80506e-64/hypothetical protein CGI_10023442 [Crassostrea gigas]	NA	sp|Q07283|TRHY_HUMAN/1e-19/Trichohyalin OS=Homo sapiens GN=TCHH PE=1 SV=2	crg:105330303/6e-25/trichohyalin-like; K16771 centrosome and spindle pole-associated protein 1	NA	NA	NA
CL1083.Contig9_All	2738	0.01	2.93	8.19476	3.19726e-25	6.24418e-24	Up	gi|405969440|gb|EKC34411.1|/0/Transmembrane channel-like protein 7 [Crassostrea gigas]	gi|309256117|gb|HQ197425.1|/6e-24/Argopecten purpuratus clone B118 microsatellite sequence	sp|Q4R7U0|TMC7_MACFA/2e-97/Transmembrane channel-like protein 7 OS=Macaca fascicularis GN=TMC7 PE=2 SV=1	tsp:Tsp_10860/2e-08/7 transmembrane receptor; K10877 DNA repair and recombination protein RAD54B [EC:3.6.4.-]	NA	PF07810/1.7E-33/TMC domain	NA
Unigene34794_All	544	0.01	2.92	8.18982	3.31916e-05	0.000182273	Up	gi|405976309|gb|EKC40821.1|/9.45681e-55/Kinesin-related protein 1 [Crassostrea gigas]	gi|524871063|ref|XM_005092251.1|/4e-06/PREDICTED: Aplysia californica kinesin-like protein KLP6-like (LOC101845071), transcript variant X5, mRNA	sp|D3YXS5|KIF28_MOUSE/2e-37/Kinesin-like protein KIF28P OS=Mus musculus GN=Kif28p PE=3 SV=1	hmg:100212235/3e-34/kif16b; kinesin-like protein KIF16B; K17916 kinesin family member 16B	YGL216w/9e-24/---	PR00380/6.6E-11/Kinesin heavy chain signature	biological_process:GO:0007018//microtubule-based movement;GO:0030705//cytoskeleton-dependent intracellular transport;cellular_component:GO:0005871//kinesin complex;molecular_function:GO:0000166//nucleotide binding;GO:0003777//microtubule motor activity;GO:0016887//ATPase activity;
Unigene32608_All	710	0.01	2.91	8.18488	1.06483e-06	7.11474e-06	Up	NA	gi|254826528|emb|FM202345.1|/1e-06/Aequipecten opercularis satellite DNA, clone gaop31	NA	NA	NA	NA	NA
Unigene36585_All	481	0.01	2.91	8.18488	0.00013138	0.000657532	Up	gi|405950758|gb|EKC18724.1|/9.13707e-38/cAMP-dependent protein kinase type II regulatory subunit [Crassostrea gigas]	NA	sp|P81900|KAPR2_DROME/2e-21/cAMP-dependent protein kinase type II regulatory subunit OS=Drosophila melanogaster GN=Pka-R2 PE=1 SV=2	ame:409390/2e-24/Pka-R2, GB14637, Pkar2; cAMP-dependent protein kinase type II regulatory subunit; K04739 cAMP-dependent protein kinase regulator	YIL033c/1e-10/---	PF00027/7.8E-22/Cyclic nucleotide-binding domain	biological_process:GO:0001932//regulation of protein phosphorylation;molecular_function:GO:0016301//kinase activity;GO:0000166//nucleotide binding;
Unigene46872_All	658	0.01	2.91	8.18488	4.21482e-06	2.6186e-05	Up	NA	NA	NA	NA	NA	NA	NA
CL1748.Contig1_All	3117	0.01	2.9	8.17991	3.29062e-28	7.1488e-27	Up	gi|410812229|gb|AFV81456.1|/1.81396e-43/DNA breaking rejoining enzymes superfamily-like protein, partial [Scrobicularia plana]	NA	sp|Q98943|CASP2_CHICK/5e-08/Caspase-2 OS=Gallus gallus GN=CASP2 PE=2 SV=2	crg:105318727/2e-14/caspase-6-like; K02186 caspase 2 [EC:3.4.22.55]	NA	PF00656/1.1E-9/Caspase domain	NA
Unigene16284_All	483	0.01	2.89	8.17493	0.00013138	0.000658626	Up	gi|524903116|ref|XP_005107773.1|/5.58197e-11/PREDICTED: zinc finger protein 64 homolog, isoforms 1 and 2-like [Aplysia californica]	NA	NA	NA	NA	PS00028/-/Zinc finger C2H2 type domain signature.	NA
Unigene44167_All	516	0.01	2.89	8.17493	6.60358e-05	0.000346574	Up	gi|405955321|gb|EKC22481.1|/6.11282e-07/hypothetical protein CGI_10002194 [Crassostrea gigas]	NA	NA	NA	NA	NA	NA
Unigene41919_All	982	0.01	2.88	8.16993	4.3379e-09	3.63954e-08	Up	gi|405977217|gb|EKC41676.1|/1.07948e-113/N-acetylglucosamine-6-sulfatase [Crassostrea gigas]	NA	sp|P50426|GNS_CAPHI/1e-93/N-acetylglucosamine-6-sulfatase OS=Capra hircus GN=GNS PE=2 SV=1	crg:105333379/2e-114/N-acetylglucosamine-6-sulfatase-like; K01137 N-acetylglucosamine-6-sulfatase [EC:3.1.6.14]	YPO0842/4e-11/---	PTHR10342/1.6E-120/--	NA
Unigene33047_All	485	0.01	2.88	8.16993	0.00013138	0.000656388	Up	gi|405951376|gb|EKC19294.1|/2.73064e-50/Double-strand break repair protein MRE11 [Crassostrea gigas]	NA	sp|Q9W6K1|MRE11_XENLA/6e-34/Double-strand break repair protein MRE11 OS=Xenopus laevis GN=mre11 PE=2 SV=1	crg:105348988/7e-51/double-strand break repair protein MRE11A-like; K10865 double-strand break repair protein MRE11	SPAC13C5.07/3e-11/---	PF04152/3.2E-15/Mre11 DNA-binding presumed domain	NA
Unigene34022_All	689	0.01	2.86	8.15987	2.1185e-06	1.37379e-05	Up	gi|195108681|ref|XP_001998921.1|/8.65218e-59/Xdh [Drosophila mojavensis] &gt;gi|193915515|gb|EDW14382.1| Xdh [Drosophila mojavensis]	NA	sp|P10351|XDH_DROME/8e-59/Xanthine dehydrogenase OS=Drosophila melanogaster GN=ry PE=2 SV=2	crg:105320513/5e-70/xanthine dehydrogenase/oxidase-like; K00106 xanthine dehydrogenase/oxidase [EC:1.17.1.4 1.17.3.2]	SMb21011/6e-29/---	PF01799/2.5E-28/[2Fe-2S] binding domain	molecular_function:GO:0005488//binding;GO:0016491//oxidoreductase activity;
Unigene36635_All	487	0.01	2.86	8.15987	0.00013138	0.000658078	Up	gi|405957653|gb|EKC23851.1|/1.03615e-36/Dynein alpha chain, flagellar outer arm [Crassostrea gigas]	NA	NA	crg:105343954/4e-43/dynein beta chain, ciliary-like; K10408 dynein heavy chain, axonemal	NA	PF03028/9.7E-7/Dynein heavy chain and region D6 of dynein motor	NA
Unigene36111_All	488	0.01	2.86	8.15987	0.00013138	0.000656443	Up	NA	NA	NA	NA	NA	NA	NA
CL874.Contig6_All	1561	0.23	65.67	8.15746	1.43793e-302	4.35771e-300	Up	NA	NA	NA	NA	NA	PF00531/1.3E-5/Death domain	NA
Unigene34929_All	557	0.01	2.85	8.15482	3.31916e-05	0.000182389	Up	NA	NA	NA	NA	NA	NA	NA
Unigene39613_All	1034	0.01	2.83	8.14466	2.18036e-09	1.87955e-08	Up	gi|67625699|tpe|CAJ00235.1|/1.14026e-19/TPA: endonuclease-reverse transcriptase [Schistosoma mansoni]	NA	NA	hmg:100211745/2e-10/E3 SUMO-protein ligase PIAS2-like; K16063 E3 SUMO-protein ligase PIAS2	NA	NA	NA
Unigene45650_All	1183	0.01	2.83	8.14466	1.39165e-10	1.30748e-09	Up	gi|405951894|gb|EKC19765.1|/3.45212e-91/hypothetical protein CGI_10007667 [Crassostrea gigas]	gi|585653947|ref|XM_006815139.1|/1e-07/PREDICTED: Saccoglossus kowalevskii centromere protein F-like (LOC102808448), mRNA	sp|Q8NB25|F184A_HUMAN/5e-13/Protein FAM184A OS=Homo sapiens GN=FAM184A PE=2 SV=3	crg:105345167/6e-12/centromere protein F-like; K11499 centromere protein F	aq_1006/1e-09/---	NA	NA
CL2315.Contig6_All	1048	0.01	2.83	8.14466	2.18036e-09	1.87713e-08	Up	gi|405964464|gb|EKC29946.1|/1.60782e-110/Arylsulfatase B [Crassostrea gigas]	NA	sp|P33727|ARSB_FELCA/1e-79/Arylsulfatase B OS=Felis catus GN=ARSB PE=2 SV=1	cin:100187202/1e-93/arylsulfatase B-like; K01135 arylsulfatase B [EC:3.1.6.12]	ZaslA/2e-30/---	PS00149/-/Sulfatases signature 2.	NA
CL1387.Contig4_All	1244	0.01	2.82	8.13955	3.51584e-11	3.45613e-10	Up	gi|260814858|ref|XP_002602130.1|/7.13863e-10/hypothetical protein BRAFLDRAFT_128459 [Branchiostoma floridae] &gt;gi|229287437|gb|EEN58142.1| hypothetical protein BRAFLDRAFT_128459 [Branchiostoma floridae]	NA	sp|Q7Z4V5|HDGR2_HUMAN/6e-06/Hepatoma-derived growth factor-related protein 2 OS=Homo sapiens GN=HDGFRP2 PE=1 SV=1	mde:101898064/3e-07/protein lava lamp; K14972 PAX-interacting protein 1	VC2030/1e-06/---	NA	NA
CL3535.Contig1_All	1012	0.01	2.81	8.13443	4.3379e-09	3.63701e-08	Up	NA	NA	NA	NA	NA	NA	NA
CL2870.Contig2_All	588	0.01	2.8	8.12928	3.31916e-05	0.000182739	Up	gi|524892215|ref|XP_005102637.1|/1.12216e-33/PREDICTED: uncharacterized protein C20orf96-like [Aplysia californica]	NA	NA	NA	NA	PF15397/1.8E-23/Domain of unknown function (DUF4618)	NA
CL1308.Contig6_All	1338	0.01	2.8	8.12928	8.88236e-12	9.05319e-11	Up	NA	NA	NA	NA	NA	NA	NA
Unigene4427_All	2106	0.01	2.8	8.12928	1.19475e-18	1.77821e-17	Up	gi|443734049|gb|ELU18184.1|/5.46824e-102/hypothetical protein CAPTEDRAFT_143422 [Capitella teleta]	gi|541985837|ref|XM_005444412.1|/4e-06/PREDICTED: Falco cherrug solute carrier family 6 (neurotransmitter transporter), member 11 (SLC6A11), mRNA	sp|O18875|SC6A8_BOVIN/2e-91/Sodium- and chloride-dependent creatine transporter 1 OS=Bos taurus GN=SLC6A8 PE=2 SV=1	crg:105329948/1e-95/sodium- and chloride-dependent taurine transporter-like; K05039 solute carrier family 6 (neurotransmitter transporter, GABA) member 6/8/11/12/13	VC2012/2e-30/---	PTHR11616/3.7E-159/--	NA
Unigene45608_All	570	0.01	2.78	8.11894	3.31916e-05	0.000182522	Up	NA	NA	NA	NA	NA	NA	NA
CL328.Contig3_All	895	0.01	2.76	8.10852	6.7964e-08	5.13181e-07	Up	gi|524889518|ref|XP_005101314.1|/3.04618e-24/PREDICTED: meiosis expressed gene 1 protein homolog isoform X1 [Aplysia californica] &gt;gi|524889520|ref|XP_005101315.1| PREDICTED: meiosis expressed gene 1 protein homolog isoform X2 [Aplysia californica] &gt;gi|524889522|ref|XP_005101316.1| PREDICTED: meiosis expressed gene 1 protein homolog isoform X3 [Aplysia californica]	NA	sp|A7SMR0|MEIG1_NEMVE/8e-23/Meiosis expressed gene 1 protein homolog OS=Nematostella vectensis GN=v1g237368 PE=3 SV=1	NA	NA	PF15163/2.3E-31/Meiosis-expressed	NA
Unigene47124_All	715	0.01	2.75	8.10329	2.1185e-06	1.3729e-05	Up	NA	NA	NA	NA	NA	NA	NA
Unigene46151_All	609	0.01	2.75	8.10329	1.66832e-05	9.5558e-05	Up	gi|405958013|gb|EKC24182.1|/3.06518e-85/hypothetical protein CGI_10013801 [Crassostrea gigas]	NA	NA	NA	NA	PTHR23125/1.5E-26/--	NA
CL2400.Contig3_All	2781	0.01	2.74	8.09803	5.0093e-24	9.33563e-23	Up	gi|405960584|gb|EKC26497.1|/2.12255e-128/Branched-chain-amino-acid aminotransferase [Crassostrea gigas]	gi|524873518|ref|XM_005093448.1|/2e-23/PREDICTED: Aplysia californica transcription factor SOX-8-like (LOC101861793), mRNA	sp|B1H349|SOX6_XENTR/4e-49/Transcription factor Sox-6 OS=Xenopus tropicalis GN=sox6 PE=2 SV=1	crg:105326856/0.0/transcription factor SOX-5-like; K09269 transcription factor SOX5/6/13 (SOX group D)	YPR052c/3e-07/---	SM00398/2.0E-26/high mobility group	NA
Unigene42504_All	1033	0.01	2.73	8.09276	4.3379e-09	3.64005e-08	Up	gi|443716696|gb|ELU08087.1|/3.88477e-109/hypothetical protein CAPTEDRAFT_90017, partial [Capitella teleta]	NA	sp|Q8T2K9|MASY_DICDI/4e-58/Malate synthase OS=Dictyostelium discoideum GN=masA PE=2 SV=2	nve:NEMVE_v1g160432/6e-43/hypothetical protein ; K01638 malate synthase [EC:2.3.3.9]	CC1765/1e-61/---	PTHR21631:SF1/3.2E-145/--	NA
CL4753.Contig2_All	2080	0.01	2.72	8.08746	9.40866e-18	1.34141e-16	Up	gi|405958957|gb|EKC25035.1|/8.77028e-28/hypothetical protein CGI_10020949 [Crassostrea gigas]	NA	NA	NA	NA	NA	NA
Unigene40035_All	650	0.01	2.72	8.08746	8.3855e-06	5.00013e-05	Up	gi|405963591|gb|EKC29153.1|/3.45587e-11/hypothetical protein CGI_10024275 [Crassostrea gigas]	NA	NA	NA	NA	NA	NA
CL915.Contig1_All	1179	0.01	2.71	8.08215	5.50844e-10	4.94939e-09	Up	gi|443728813|gb|ELU14992.1|/2.26163e-26/hypothetical protein CAPTEDRAFT_148553 [Capitella teleta]	NA	sp|Q9CPY4|CDKA2_MOUSE/2e-18/Cyclin-dependent kinase 2-associated protein 2 OS=Mus musculus GN=Cdk2ap2 PE=2 SV=1	loa:LOAG_04022/8e-11/hypothetical protein; K17868 diphthamide biosynthesis protein 7	NA	PF09806/1.2E-31/Cyclin-dependent kinase 2-associated protein	NA
CL553.Contig2_All	940	0.01	2.71	8.08215	3.41608e-08	2.65657e-07	Up	gi|338193447|gb|ADM87425.3|/5.28908e-95/Akt [Gecarcinus lateralis]	gi|637336516|ref|XM_008117446.1|/1e-19/PREDICTED: Anolis carolinensis v-akt murine thymoma viral oncogene homolog 3 (akt3), mRNA	sp|Q9XTG7|AKT2_CAEEL/6e-76/Serine/threonine-protein kinase akt-2 OS=Caenorhabditis elegans GN=akt-2 PE=1 SV=1	aga:AgaP_AGAP002161/2e-91/AGAP002161-PA; K04456 RAC serine/threonine-protein kinase [EC:2.7.11.1]	SPAC17G8.14c_2/5e-31/---	PS50003/15.799/PH domain profile.	biological_process:GO:0018105//peptidyl-serine phosphorylation;GO:0035556//intracellular signal transduction;cellular_component:GO:0005622//intracellular;molecular_function:GO:0004674//protein serine/threonine kinase activity;GO:0000166//nucleotide binding;
CL1610.Contig2_All	667	0.01	2.7	8.07682	8.3855e-06	5.00408e-05	Up	gi|405967506|gb|EKC32658.1|/4.63191e-06/Tripartite motif-containing protein 2 [Crassostrea gigas]	NA	NA	NA	NA	NA	NA
Unigene36243_All	584	0.01	2.7	8.07682	3.31916e-05	0.000182472	Up	gi|405978271|gb|EKC42676.1|/8.79531e-15/Protein jagged-1b [Crassostrea gigas]	NA	NA	crg:105317836/2e-15/protein jagged-1b-like; K06052 jagged	NA	NA	NA
Unigene45369_All	517	0.01	2.68	8.06609	0.00013138	0.00065666	Up	gi|585643586|ref|XP_006811377.1|/6.31112e-12/PREDICTED: uncharacterized protein LOC102801802 [Saccoglossus kowalevskii]	NA	NA	NA	NA	NA	NA
Unigene44615_All	556	0.01	2.66	8.05528	6.60358e-05	0.000347148	Up	gi|405954335|gb|EKC21804.1|/5.97827e-28/Putative ZDHHC-type palmitoyltransferase 4 [Crassostrea gigas]	NA	sp|Q2TGI8|ZDH22_RAT/3e-15/Palmitoyltransferase ZDHHC22 OS=Rattus norvegicus GN=Zdhhc22 PE=2 SV=1	crg:105317964/1e-28/palmitoyltransferase ZDHHC22-like; K18932 palmitoyltransferase [EC:2.3.1.225]	NA	PS50216/12.436/Zinc finger DHHC-type profile.	NA
Unigene32148_All	556	0.01	2.66	8.05528	6.60358e-05	0.000346725	Up	NA	NA	NA	NA	NA	NA	NA
CL1992.Contig1_All	1267	0.01	2.65	8.04985	1.39165e-10	1.30728e-09	Up	gi|405972642|gb|EKC37402.1|/4.75963e-126/Putative ATP-dependent RNA helicase TDRD9 [Crassostrea gigas]	NA	sp|Q296Q5|SPNE_DROPS/2e-70/Probable ATP-dependent RNA helicase spindle-E OS=Drosophila pseudoobscura pseudoobscura GN=spn-E PE=3 SV=2	cmk:103175303/6e-81/tdrd9; tudor domain containing 9; K18408 ATP-dependent RNA helicase TDRD9 [EC:3.6.4.13]	YKL078w/3e-39/---	PF00270/1.1E-10/DEAD/DEAH box helicase	biological_process:GO:0006396//RNA processing;GO:0009566//fertilization;GO:0007283//spermatogenesis;GO:0034587//piRNA metabolic process;GO:0007140//male meiosis;GO:0043046//DNA methylation involved in gamete generation;cellular_component:GO:0005634//nucleus;GO:0071547//piP-body;molecular_function:GO:0044822//poly(A) RNA binding;GO:0004004//ATP-dependent RNA helicase activity;
Unigene33468_All	1250	0.01	2.64	8.04439	1.39165e-10	1.3083e-09	Up	NA	NA	NA	NA	NA	NA	NA
CL3936.Contig1_All	946	0.01	2.64	8.04439	6.7964e-08	5.12988e-07	Up	gi|194862366|ref|XP_001969986.1|/2.74278e-10/GG25361, isoform A [Drosophila erecta] &gt;gi|190661853|gb|EDV59045.1| GG25361, isoform A [Drosophila erecta]	NA	sp|Q05049|MUC1_XENLA/3e-09/Integumentary mucin C.1 (Fragment) OS=Xenopus laevis PE=2 SV=1	cmy:102931860/3e-08/MUC2; mucin 2, oligomeric mucus/gel-forming; K10955 intestinal mucin-2	YJL079c/3e-06/---	NA	NA
CL554.Contig1_All	1554	0.01	2.64	8.04439	5.66928e-13	6.22094e-12	Up	gi|405963274|gb|EKC28863.1|/5.15178e-19/hypothetical protein CGI_10008953 [Crassostrea gigas]	NA	sp|Q55AX2|DOT1L_DICDI/2e-06/Histone-lysine N-methyltransferase, H3 lysine-79 specific OS=Dictyostelium discoideum GN=dotA PE=2 SV=2	NA	NA	PF12736/2.5E-12/Cell-cycle sustaining, positive selection,	NA
CL4131.Contig1_All	1446	0.01	2.62	8.03342	4.46456e-12	4.63662e-11	Up	NA	NA	NA	NA	NA	NA	NA
CL4476.Contig2_All	746	0.01	2.62	8.03342	2.1185e-06	1.37231e-05	Up	NA	NA	NA	NA	NA	NA	NA
CL805.Contig14_All	3581	0.01	2.62	8.03342	2.10028e-29	4.73332e-28	Up	gi|405965222|gb|EKC30619.1|/0/Centrosome and spindle pole-associated protein 1 [Crassostrea gigas]	NA	sp|Q1MSJ5|CSPP1_HUMAN/8e-82/Centrosome and spindle pole-associated protein 1 OS=Homo sapiens GN=CSPP1 PE=1 SV=4	crg:105330303/0.0/trichohyalin-like; K16771 centrosome and spindle pole-associated protein 1	NMA0905/1e-09/---	PTHR21616/4.2E-95/--	NA
CL3286.Contig3_All	1202	0.03	7.83	8.02791	8.31336e-29	1.84054e-27	Up	gi|62858325|ref|NP_001015996.1|/2.66375e-06/uncharacterized protein LOC548750 [Xenopus (Silurana) tropicalis]	NA	sp|Q9CQ86|MIEN1_MOUSE/9e-07/Migration and invasion enhancer 1 OS=Mus musculus GN=Mien1 PE=1 SV=1	xtr:548750/5e-07/mien1, c17orf37; migration and invasion enhancer 1; K07401 selenoprotein W-related protein	NA	NA	NA
CL209.Contig8_All	5623	0.01	2.61	8.02791	7.7808e-46	2.67528e-44	Up	gi|405953685|gb|EKC21299.1|/3.36769e-171/Regulator of differentiation 1 [Crassostrea gigas]	gi|512910081|ref|XM_004927023.1|/7e-19/PREDICTED: Bombyx mori polypyrimidine tract-binding protein 3-like (LOC101740192), mRNA	sp|O95758|PTBP3_HUMAN/6e-141/Polypyrimidine tract-binding protein 3 OS=Homo sapiens GN=PTBP3 PE=1 SV=2	aec:105143854/6e-155/polypyrimidine tract-binding protein 1; K14948 polypyrimidine tract-binding protein 2	NA	PTHR11546/1.3E-224/--	NA
Unigene36183_All	682	0.01	2.59	8.01681	8.3855e-06	5.00062e-05	Up	gi|291225047|ref|XP_002732513.1|/5.58435e-10/PREDICTED: uncharacterized protein LOC100370751 [Saccoglossus kowalevskii]	NA	NA	bfo:BRAFLDRAFT_125648/1e-06/hypothetical protein; K00485 dimethylaniline monooxygenase (N-oxide forming) [EC:1.14.13.8]	NA	PF00350/2.6E-12/Dynamin family	NA
Unigene36523_All	866	0.01	2.59	8.01681	2.69016e-07	1.91794e-06	Up	gi|405962222|gb|EKC27921.1|/6.74004e-58/Kyphoscoliosis peptidase [Crassostrea gigas]	NA	sp|Q8NBH2|KY_HUMAN/5e-08/Kyphoscoliosis peptidase OS=Homo sapiens GN=KY PE=1 SV=2	NA	NA	NA	NA
Unigene32402_All	574	0.01	2.57	8.00562	6.60358e-05	0.000346846	Up	gi|350587918|ref|XP_003482515.1|/1.72572e-07/PREDICTED: LOW QUALITY PROTEIN: centromere-associated protein E [Sus scrofa]	NA	sp|Q5HZI1|MTUS1_MOUSE/8e-07/Microtubule-associated tumor suppressor 1 homolog OS=Mus musculus GN=Mtus1 PE=1 SV=2	ssc:100626792/4e-08/CENPE; centromere protein E, 312kDa; K11498 centromeric protein E	PAB2109/4e-07/---	NA	NA
Unigene40582_All	612	0.01	2.57	8.00562	3.31916e-05	0.000182655	Up	gi|405960487|gb|EKC26408.1|/1.09086e-13/CD63 antigen [Crassostrea gigas]	NA	sp|Q61451|CD53_MOUSE/4e-11/Leukocyte surface antigen CD53 OS=Mus musculus GN=Cd53 PE=2 SV=2	crg:105321215/5e-15/tetraspanin-9-like; K17353 tetraspanin-18	NA	PTHR19282/5.9E-12/--	NA
Unigene33481_All	874	0.01	2.56	8	2.69016e-07	1.91839e-06	Up	NA	NA	NA	NA	NA	NA	NA
Unigene37803_All	803	0.01	2.55	7.99435	1.06483e-06	7.11395e-06	Up	NA	NA	NA	NA	NA	NA	NA
Unigene34356_All	579	0.01	2.55	7.99435	6.60358e-05	0.000346635	Up	NA	NA	NA	NA	NA	NA	NA
CL663.Contig1_All	806	0.01	2.55	7.99435	1.06483e-06	7.10529e-06	Up	gi|405977193|gb|EKC41655.1|/1.78915e-38/Tctex1 domain-containing protein 1-B [Crassostrea gigas]	NA	sp|A2VDD2|TC1DB_XENLA/8e-19/Tctex1 domain-containing protein 1-B (Fragment) OS=Xenopus laevis GN=tctex1d1-b PE=2 SV=1	nve:NEMVE_v1g242105/2e-13/hypothetical protein ; K06085 synovial sarcoma, X breakpoint 2 interacting protein	NA	PTHR21255/2.4E-42/--	NA
CL3229.Contig2_All	1066	0.01	2.55	7.99435	8.63036e-09	7.06789e-08	Up	NA	NA	NA	NA	NA	NA	NA
Unigene34251_All	543	0.01	2.54	7.98868	0.00013138	0.000658571	Up	gi|556098848|gb|ESO87500.1|/4.10206e-58/hypothetical protein LOTGIDRAFT_127673 [Lottia gigantea]	NA	sp|Q6GN11|DI3L1_XENLA/4e-58/DIS3-like exonuclease 1 OS=Xenopus laevis GN=dis3l PE=2 SV=2	crg:105322274/3e-68/DIS3-like exonuclease 1; K18681 DIS3-like exonuclease 1 [EC:3.1.13.-]	SPBC26H8.10/6e-28/---	PTHR23355:SF30/1.7E-76/--	NA
CL2066.Contig2_All	843	0.01	2.54	7.98868	5.35216e-07	3.691e-06	Up	NA	NA	NA	NA	NA	NA	NA
CL3485.Contig1_All	653	0.01	2.54	7.98868	3.31916e-05	0.000182289	Up	NA	NA	NA	NA	NA	NA	NA
CL317.Contig3_All	666	0.01	2.53	7.98299	1.66832e-05	9.57855e-05	Up	gi|524871244|ref|XP_005092398.1|/1.92808e-36/PREDICTED: sodium-coupled monocarboxylate transporter 1-like [Aplysia californica]	NA	sp|A7MBD8|SC5AC_BOVIN/1e-28/Sodium-coupled monocarboxylate transporter 2 OS=Bos taurus GN=SLC5A12 PE=2 SV=1	crg:105317404/3e-31/sodium-coupled monocarboxylate transporter 2-like; K14388 solute carrier family 5 (sodium-coupled monocarboxylate transporter), member 8/12	SA0303/3e-09/---	PTHR11819:SF16/8.8E-47/--	NA
Unigene47150_All	545	0.01	2.53	7.98299	0.00013138	0.000656552	Up	NA	NA	NA	NA	NA	NA	NA
CL3032.Contig2_All	1802	0.01	2.52	7.97728	3.6185e-14	4.25804e-13	Up	NA	NA	NA	NA	NA	NA	NA
Unigene41009_All	623	0.01	2.52	7.97728	3.31916e-05	0.000182406	Up	gi|405976309|gb|EKC40821.1|/4.9371e-57/Kinesin-related protein 1 [Crassostrea gigas]	NA	sp|F8WLE0|KIF28_RAT/2e-18/Kinesin-like protein KIF28P OS=Rattus norvegicus GN=Kif28p PE=2 SV=1	cqu:CpipJ_CPIJ000231/8e-11/kinesin; K17914 kinesin family member 13	NA	PF12423/2.8E-7/Kinesin protein 1B	NA
CL2350.Contig1_All	738	0.01	2.51	7.97154	4.21482e-06	2.61941e-05	Up	NA	NA	NA	NA	NA	NA	NA
CL166.Contig1_All	888	0.01	2.5	7.96578	5.35216e-07	3.69227e-06	Up	NA	NA	NA	NA	NA	NA	NA
Unigene34458_All	590	0.01	2.49	7.96	6.60358e-05	0.000347027	Up	NA	NA	NA	NA	NA	NA	NA
Unigene39318_All	591	0.01	2.49	7.96	6.60358e-05	0.000346514	Up	gi|524912937|ref|XP_005111304.1|/1.55969e-38/PREDICTED: ataxin-7-like protein 3-like isoform X4 [Aplysia californica]	gi|556965381|ref|XM_005992211.1|/4e-12/PREDICTED: Latimeria chalumnae ataxin 7-like 3 (ATXN7L3), mRNA	sp|Q14CW9|AT7L3_HUMAN/1e-23/Ataxin-7-like protein 3 OS=Homo sapiens GN=ATXN7L3 PE=1 SV=1	crg:105326509/1e-35/ataxin-7-like protein 3; K11363 SAGA-associated factor 11	NA	PS51505/12.905/SCA7 domain profile.	NA
Unigene42939_All	594	0.01	2.48	7.9542	6.60358e-05	0.000346544	Up	gi|405953136|gb|EKC20853.1|/5.87208e-70/Transformation/transcription domain-associated protein [Crassostrea gigas]	gi|390343731|ref|XM_001181502.2|/1e-09/PREDICTED: Strongylocentrotus purpuratus transformation/transcription domain-associated protein-like (LOC753197), mRNA	sp|Q80YV3|TRRAP_MOUSE/1e-54/Transformation/transcription domain-associated protein OS=Mus musculus GN=Trrap PE=1 SV=2	crg:105345162/1e-70/transformation/transcription domain-associated protein-like; K08874 transformation/transcription domain-associated protein	YHR099w/3e-09/---	NA	NA
Unigene37753_All	903	0.01	2.48	7.9542	2.69016e-07	1.91703e-06	Up	gi|260795011|ref|XP_002592500.1|/6.93912e-16/hypothetical protein BRAFLDRAFT_68991 [Branchiostoma floridae] &gt;gi|229277720|gb|EEN48511.1| hypothetical protein BRAFLDRAFT_68991 [Branchiostoma floridae]	NA	NA	NA	NA	NA	NA
CL5378.Contig1_All	749	0.01	2.46	7.94251	8.3855e-06	5.00755e-05	Up	NA	NA	NA	NA	NA	NA	NA
Unigene35414_All	791	0.01	2.46	7.94251	2.1185e-06	1.37349e-05	Up	NA	NA	NA	NA	NA	NA	NA
CL3385.Contig1_All	772	0.01	2.45	7.93664	4.21482e-06	2.62184e-05	Up	gi|405975379|gb|EKC39945.1|/3.00656e-32/Amiloride-sensitive sodium channel subunit gamma [Crassostrea gigas]	NA	sp|Q9UHC3|ASIC3_HUMAN/4e-11/Acid-sensing ion channel 3 OS=Homo sapiens GN=ASIC3 PE=1 SV=2	crg:105327597/2e-36/amiloride-sensitive sodium channel subunit gamma-like; K04827 amiloride-sensitive sodium channel subunit gamma	NA	PR01078/3.2E-15/Amiloride-sensitive sodium channel alpha-subunit signature	NA
CL1932.Contig5_All	6033	0.01	2.44	7.93074	3.91088e-46	1.35317e-44	Up	gi|524898127|ref|XP_005105517.1|/0/PREDICTED: ras GTPase-activating-like protein IQGAP1-like isoform X1 [Aplysia californica] &gt;gi|524898129|ref|XP_005105518.1| PREDICTED: ras GTPase-activating-like protein IQGAP1-like isoform X2 [Aplysia californica] &gt;gi|524898131|ref|XP_005105519.1| PREDICTED: ras GTPase-activating-like protein IQGAP1-like isoform X3 [Aplysia californica] &gt;gi|524898133|…	gi|560950353|ref|XM_006197665.1|/1e-17/PREDICTED: Vicugna pacos IQ motif containing GTPase activating protein 2 (IQGAP2), mRNA	sp|Q9JKF1|IQGA1_MOUSE/0.0/Ras GTPase-activating-like protein IQGAP1 OS=Mus musculus GN=Iqgap1 PE=1 SV=2	crg:105346947/0.0/ras GTPase-activating-like protein IQGAP1; K16848 Ras GTPase-activating-like protein IQGAP1	SPAC4F8.13c/3e-100/---	PS50096/9.761/IQ motif profile.	NA
CL33.Contig2_All	2223	0.01	2.44	7.93074	3.72416e-17	5.14304e-16	Up	gi|405975909|gb|EKC40440.1|/2.04522e-38/Neuronal acetylcholine receptor subunit alpha-6 [Crassostrea gigas]	NA	sp|Q9I8C7|ACH10_CHICK/9e-31/Neuronal acetylcholine receptor subunit alpha-10 OS=Gallus gallus GN=CHRNA10 PE=3 SV=1	spu:581710/8e-35/neuronal acetylcholine receptor subunit alpha-3; K05312 nicotinic acetylcholine receptor, invertebrate	YOR054c/4e-12/---	PTHR18945/1.6E-46/--	biological_process:GO:0044700//single organism signaling;GO:0006810//transport;GO:0007154//cell communication;cellular_component:GO:0016020//membrane;
CL289.Contig5_All	2229	0.01	2.44	7.93074	3.72416e-17	5.14186e-16	Up	gi|405957467|gb|EKC23675.1|/0/Laminin subunit alpha-3 [Crassostrea gigas]	NA	sp|Q5SNZ0|GRDN_MOUSE/7e-25/Girdin OS=Mus musculus GN=Ccdc88a PE=1 SV=2	cin:100184734/1e-40/paramyosin; K14662 protein N-terminal asparagine amidohydrolase [EC:3.5.1.-]	aq_1006/8e-24/---	NA	NA
CL3366.Contig2_All	921	0.01	2.44	7.93074	2.69016e-07	1.91816e-06	Up	NA	NA	NA	NA	NA	NA	NA
CL40.Contig5_All	3168	0.01	2.43	7.92481	2.51784e-24	4.75559e-23	Up	gi|405951405|gb|EKC19320.1|/1.58684e-34/hypothetical protein CGI_10008806 [Crassostrea gigas]	NA	sp|Q55GJ2|IREA_DICDI/5e-08/Probable serine/threonine-protein kinase ireA OS=Dictyostelium discoideum GN=ireA PE=3 SV=1	pxy:105380041/2e-07/peptidyl-prolyl cis-trans isomerase-like 4; K12735 peptidyl-prolyl cis-trans isomerase-like 4 [EC:5.2.1.8]	NA	NA	NA
CL1633.Contig3_All	856	0.01	2.43	7.92481	1.06483e-06	7.10687e-06	Up	NA	NA	NA	NA	NA	NA	NA
CL2652.Contig1_All	755	0.01	2.42	7.91886	8.3855e-06	5.00359e-05	Up	NA	NA	NA	NA	NA	NA	NA
CL1994.Contig1_All	1048	0.01	2.41	7.91289	3.41608e-08	2.65417e-07	Up	gi|556098932|gb|ESO87584.1|/2.60924e-68/hypothetical protein LOTGIDRAFT_166465 [Lottia gigantea]	NA	sp|Q5ND28|SREC_MOUSE/4e-41/Scavenger receptor class F member 1 OS=Mus musculus GN=Scarf1 PE=1 SV=1	crg:105333895/8e-60/uncharacterized LOC105333895; K18032 receptor-type tyrosine-protein phosphatase A [EC:3.1.3.48]	NA	SM00181/59.0/Epidermal growth factor-like domain.	NA
CL322.Contig2_All	910	0.01	2.39	7.90087	5.35216e-07	3.69311e-06	Up	NA	NA	NA	NA	NA	NA	NA
CL2164.Contig1_All	1058	0.01	2.39	7.90087	3.41608e-08	2.65725e-07	Up	gi|390341043|ref|XP_003725361.1|/6.17196e-25/PREDICTED: zinc finger HIT domain-containing protein 3-like [Strongylocentrotus purpuratus]	gi|289466197|gb|GQ129702.1|/8e-12/Gibbula cineraria clone Gcin23 microsatellite sequence	sp|Q9CQK1|ZNHI3_MOUSE/5e-21/Zinc finger HIT domain-containing protein 3 OS=Mus musculus GN=Znhit3 PE=1 SV=1	tsp:Tsp_00008/2e-09/GDP-fucose protein O-fucosyltransferase 2; K03691 peptide-O-fucosyltransferase [EC:2.4.1.221]	NA	PS51083/11.603/Zinc finger HIT-type profile.	NA
Unigene32097_All	694	0.01	2.39	7.90087	1.66832e-05	9.57035e-05	Up	gi|405975597|gb|EKC40151.1|/4.86905e-41/Prostaglandin E2 receptor EP4 subtype [Crassostrea gigas]	NA	sp|Q28691|PE2R4_RABIT/1e-21/Prostaglandin E2 receptor EP4 subtype OS=Oryctolagus cuniculus GN=PTGER4 PE=2 SV=1	crg:105320130/1e-41/prostaglandin E2 receptor EP4 subtype-like; K04261 prostaglandin E receptor 4	NA	PR00237/7.0E-8/Rhodopsin-like GPCR superfamily signature	NA
Unigene33346_All	892	0.01	2.39	7.90087	5.35216e-07	3.69142e-06	Up	gi|556962138|ref|XP_005991259.1|/5.72264e-15/PREDICTED: pleckstrin homology domain-containing family B member 2-like isoform X1 [Latimeria chalumnae]	NA	sp|Q5R4K6|PKHB2_PONAB/1e-14/Pleckstrin homology domain-containing family B member 2 OS=Pongo abelii GN=PLEKHB2 PE=2 SV=1	NA	NA	PS50003/11.463/PH domain profile.	NA
Unigene38506_All	576	0.01	2.38	7.89482	0.00013138	0.000657969	Up	NA	NA	NA	NA	NA	NA	NA
Unigene38759_All	777	0.01	2.38	7.89482	4.21482e-06	2.61914e-05	Up	gi|405952087|gb|EKC19937.1|/9.24369e-13/Poly [ADP-ribose] polymerase 14 [Crassostrea gigas]	NA	sp|O70303|CIDEB_MOUSE/5e-09/Cell death activator CIDE-B OS=Mus musculus GN=Cideb PE=1 SV=2	crg:105324292/2e-13/poly [ADP-ribose] polymerase 14-like; K15261 poly [ADP-ribose] polymerase 10/14/15 [EC:2.4.2.30]	NA	PS51135/21.045/CIDE-N domain profile.	NA
Unigene31655_All	1252	0.01	2.37	7.88874	2.18036e-09	1.87847e-08	Up	NA	gi|28446411|emb|AL935200.9|/9e-09/Zebrafish DNA sequence from clone CH211-237I5 in linkage group 3, complete sequence	NA	NA	NA	NA	NA
CL718.Contig1_All	1696	0.01	2.37	7.88874	1.12792e-12	1.21708e-11	Up	gi|524882261|ref|XP_005097775.1|/9.34891e-70/PREDICTED: retinol dehydrogenase 7-like isoform X1 [Aplysia californica] &gt;gi|524882263|ref|XP_005097776.1| PREDICTED: retinol dehydrogenase 7-like isoform X2 [Aplysia californica] &gt;gi|524882265|ref|XP_005097777.1| PREDICTED: retinol dehydrogenase 7-like isoform X3 [Aplysia californica] &gt;gi|524882267|ref|XP_005097778.1| PREDICTED: retinol dehyd…	NA	sp|Q27979|RDH1_BOVIN/3e-56/11-cis retinol dehydrogenase OS=Bos taurus GN=RDH5 PE=1 SV=1	tru:101069778/2e-61/11-cis retinol dehydrogenase-like; K00061 11-cis-retinol dehydrogenase [EC:1.1.1.315]	ECs0556/6e-26/---	PF00106/9.6E-24/short chain dehydrogenase	NA
Unigene35329_All	620	0.01	2.36	7.88264	6.60358e-05	0.000346424	Up	gi|405959277|gb|EKC25330.1|/2.17689e-73/IgGFc-binding protein [Crassostrea gigas]	NA	sp|P57999|ZAN_RABIT/9e-29/Zonadhesin (Fragment) OS=Oryctolagus cuniculus GN=ZAN PE=2 SV=2	ola:101172773/1e-21/alpha-tectorin-like; K18273 alpha-tectorin	NA	PS01186/-/EGF-like domain signature 2.	NA
CL2102.Contig4_All	2724	0.01	2.35	7.87652	3.8329e-20	6.11035e-19	Up	gi|405966920|gb|EKC32147.1|/0/Clathrin interactor 1 [Crassostrea gigas]	gi|524883289|ref|XM_005098221.1|/1e-18/PREDICTED: Aplysia californica clathrin interactor 1-like (LOC101847340), mRNA	sp|A7Z035|EPN4_BOVIN/3e-105/Clathrin interactor 1 OS=Bos taurus GN=CLINT1 PE=2 SV=1	cmk:103177297/6e-101/clint1; clathrin interactor 1; K12471 epsin	NA	PTHR12276:SF46/9.3E-127/--	NA
CL2536.Contig3_All	3773	0.01	2.34	7.87036	1.3025e-27	2.78648e-26	Up	gi|405970093|gb|EKC35028.1|/0/Tetratricopeptide repeat protein 18 [Crassostrea gigas]	gi|524900839|ref|XM_005106780.1|/1e-16/PREDICTED: Aplysia californica tetratricopeptide repeat protein 18-like (LOC101845872), transcript variant X4, mRNA	sp|Q5T0N1|TTC18_HUMAN/0.0/Tetratricopeptide repeat protein 18 OS=Homo sapiens GN=TTC18 PE=2 SV=3	api:100163982/4e-07/RNA polymerase-associated protein CTR9 homolog; K15176 RNA polymerase-associated protein CTR9	NA	PF07719/0.062/Tetratricopeptide repeat	NA
CL2471.Contig3_All	1781	0.01	2.34	7.87036	2.84956e-13	3.18243e-12	Up	gi|556112348|gb|ESP01000.1|/1.10741e-60/hypothetical protein LOTGIDRAFT_172836 [Lottia gigantea]	NA	sp|Q08BN9|NXPE3_DANRE/7e-33/NXPE family member 3 OS=Danio rerio GN=nxpe3 PE=2 SV=1	NA	NA	PTHR16165/4.9E-68/--	NA
CL346.Contig3_All	1119	0.01	2.32	7.85798	3.41608e-08	2.65691e-07	Up	gi|405950112|gb|EKC18117.1|/1.10659e-35/Polyamine oxidase 3 [Crassostrea gigas]	NA	NA	hmg:100202596/3e-06/kdm1b; lysine-specific histone demethylase 1B; K19413 lysine-specific histone demethylase 1B [EC:1.-.-.-]	NA	NA	NA
Unigene34767_All	794	0.01	2.32	7.85798	4.21482e-06	2.62049e-05	Up	gi|585721570|ref|XP_002732174.2|/4.41294e-42/PREDICTED: probable E3 ubiquitin-protein ligase ARI9-like, partial [Saccoglossus kowalevskii]	NA	sp|Q54CX4|Y5521_DICDI/2e-08/Uncharacterized protein DDB_G0292642 OS=Dictyostelium discoideum GN=DDB_G0292642 PE=4 SV=2	aqu:100633511/8e-18/E3 ubiquitin-protein ligase RNF19A-like; K11972 E3 ubiquitin-protein ligase RNF19A [EC:2.3.2.27]	NA	PTHR11685/5.8E-15/--	biological_process:GO:0044267//cellular protein metabolic process;
CL2205.Contig5_All	2827	0.01	2.31	7.85175	1.92654e-20	3.1149e-19	Up	NA	NA	NA	NA	NA	NA	NA
CL1465.Contig1_All	759	0.01	2.31	7.85175	8.3855e-06	5.00507e-05	Up	NA	gi|193734852|gb|EU623933.1|/1e-09/Argopecten irradians clone HWDD051 microsatellite sequence	NA	NA	NA	NA	NA
CL456.Contig4_All	2440	0.01	2.3	7.84549	9.40866e-18	1.34173e-16	Up	gi|405969074|gb|EKC34084.1|/0/Spermatogenesis-associated protein 18-like protein [Crassostrea gigas]	gi|524875820|ref|XM_005094576.1|/3e-16/PREDICTED: Aplysia californica mitochondria-eating protein-like (LOC101857320), mRNA	sp|Q503Q1|MIEAP_DANRE/4e-106/Mitochondria-eating protein OS=Danio rerio GN=spata18 PE=2 SV=2	cmk:103189866/7e-08/cit; citron rho-interacting serine/threonine kinase; K16308 citron Rho-interacting kinase [EC:2.7.11.1]	NA	PTHR21771:SF0/1.3E-164/--	NA
Unigene37203_All	597	0.01	2.29	7.8392	0.00013138	0.000658352	Up	gi|405959192|gb|EKC25253.1|/4.29088e-52/Forkhead box protein P1 [Crassostrea gigas]	gi|224037726|gb|FJ617444.1|/1e-06/Octopus vulgaris forkhead box protein P mRNA, partial cds	sp|Q2LE08|FXP1B_DANRE/2e-32/Forkhead box protein P1-B OS=Danio rerio GN=foxp1b PE=2 SV=1	crg:105322369/1e-52/forkhead box protein P1-like; K09409 forkhead box protein P	NA	PTHR25042/6.9E-38/--	NA
CL3450.Contig1_All	1050	0.01	2.29	7.8392	1.35216e-07	9.91686e-07	Up	gi|156400832|ref|XP_001638996.1|/7.6981e-20/predicted protein [Nematostella vectensis] &gt;gi|156226121|gb|EDO46933.1| predicted protein [Nematostella vectensis]	NA	NA	NA	NA	PTHR19277/9.9E-26/--	NA
CL1989.Contig2_All	1294	0.01	2.28	7.83289	2.18036e-09	1.87874e-08	Up	NA	NA	NA	NA	NA	NA	NA
CL3138.Contig1_All	1451	0.01	2.28	7.83289	1.39165e-10	1.30769e-09	Up	NA	gi|239585671|gb|FJ997256.1|/7e-22/Argopecten irradians microsatellite Asd058 sequence	NA	NA	NA	NA	NA
CL448.Contig7_All	2351	0.01	2.28	7.83289	7.40932e-17	1.00776e-15	Up	gi|585702292|ref|XP_006897663.1|/1.73375e-27/PREDICTED: prolow-density lipoprotein receptor-related protein 1 [Elephantulus edwardii]	NA	sp|Q07954|LRP1_HUMAN/2e-28/Prolow-density lipoprotein receptor-related protein 1 OS=Homo sapiens GN=LRP1 PE=1 SV=2	myd:102773497/5e-28/LRP1; low density lipoprotein receptor-related protein 1; K04550 low-density lipoprotein receptor-related protein 1 (alpha-2-macroglobulin receptor); K05089 platelet-derived growth factor receptor beta [EC:2.7.10.1]; K06256 CD44 antigen; K06464 integrin beta 2	NA	SM00192/2.4E-13/Low-density lipoprotein receptor domain class A	NA
Unigene44826_All	601	0.01	2.27	7.82655	0.00013138	0.000657096	Up	NA	NA	NA	NA	NA	NA	NA
Unigene34752_All	644	0.01	2.27	7.82655	6.60358e-05	0.000346394	Up	gi|524864528|ref|XP_005089099.1|/5.70134e-43/PREDICTED: HEAT repeat-containing protein 4-like isoform X2 [Aplysia californica]	NA	sp|Q8T6B4|ABCF4_DICDI/9e-06/ABC transporter F family member 4 OS=Dictyostelium discoideum GN=abcF4 PE=3 SV=1	gfr:102039388/2e-06/microtubule-associated protein 1B-like; K10429 microtubule-associated protein 1	NA	NA	NA
CL732.Contig5_All	2959	0.01	2.26	7.82018	4.86718e-21	8.06179e-20	Up	gi|405966454|gb|EKC31738.1|/5.21452e-32/hypothetical protein CGI_10008997 [Crassostrea gigas]	NA	NA	NA	NA	NA	NA
CL2727.Contig1_All	730	0.01	2.24	7.80735	3.31916e-05	0.000182572	Up	gi|556116854|gb|ESP05506.1|/2.00138e-11/hypothetical protein LOTGIDRAFT_228061 [Lottia gigantea]	NA	NA	NA	NA	NA	NA
Unigene40135_All	694	0.01	2.24	7.80735	3.31916e-05	0.000182306	Up	gi|405970468|gb|EKC35367.1|/3.36862e-10/Carcinoembryonic antigen-related cell adhesion molecule 1 [Crassostrea gigas]	NA	NA	NA	NA	NA	NA
CL4109.Contig1_All	2131	0.04	8.95	7.80574	1.10859e-58	5.0193e-57	Up	gi|405973283|gb|EKC38006.1|/5.08993e-47/hypothetical protein CGI_10006955 [Crassostrea gigas]	NA	NA	NA	NA	PF05050/6.0E-4/Methyltransferase FkbM domain	NA
CL2427.Contig7_All	1811	0.01	2.22	7.79442	1.12792e-12	1.21795e-11	Up	gi|405962584|gb|EKC28247.1|/3.97778e-82/Tenascin-X [Crassostrea gigas]	NA	sp|Q9XWD6|CED1_CAEEL/4e-47/Cell death abnormality protein 1 OS=Caenorhabditis elegans GN=ced-1 PE=1 SV=1	crg:105333895/5e-59/uncharacterized LOC105333895; K18032 receptor-type tyrosine-protein phosphatase A [EC:3.1.3.48]	NA	SM00181/100.0/Epidermal growth factor-like domain.	NA
Unigene31422_All	1254	0.01	2.22	7.79442	8.63036e-09	7.06885e-08	Up	NA	NA	NA	NA	NA	NA	NA
Unigene33882_All	663	0.01	2.2	7.78136	6.60358e-05	0.000346454	Up	gi|405959277|gb|EKC25330.1|/3.21435e-76/IgGFc-binding protein [Crassostrea gigas]	NA	sp|O88799|ZAN_MOUSE/1e-18/Zonadhesin OS=Mus musculus GN=Zan PE=2 SV=1	crg:105335200/4e-17/uncharacterized LOC105335200; K06493 integrin beta 3; K06825 fibrillin 1	NA	SM00181/37.0/Epidermal growth factor-like domain.	NA
CL606.Contig2_All	940	0.01	2.16	7.75489	1.06483e-06	7.10294e-06	Up	NA	NA	NA	NA	NA	NA	NA
CL144.Contig2_All	3493	0.01	2.15	7.74819	9.96614e-24	1.83916e-22	Up	gi|405952501|gb|EKC20303.1|/9.60268e-73/DnaJ-like protein subfamily B member 3 [Crassostrea gigas]	gi|41053502|ref|NM_200305.1|/3e-14/Danio rerio DnaJ (Hsp40) homolog, subfamily B, member 6b (dnajb6b), mRNA >gi|29436547|gb|BC049536.1| Danio rerio DnaJ (Hsp40) homolog, subfamily B, member 6, mRNA (cDNA clone MGC:56709 IMAGE:6034324), complete cds	sp|Q4R7Y5|DNJB6_MACFA/4e-56/DnaJ homolog subfamily B member 6 OS=Macaca fascicularis GN=DNAJB6 PE=2 SV=1	crg:105326853/4e-81/dnaJ homolog subfamily B member 6-like; K09512 DnaJ homolog subfamily B member 6	SA1408/1e-24/---	PF00226/2.0E-29/DnaJ domain	NA
CL4753.Contig4_All	2070	0.01	2.12	7.72792	7.1991e-14	8.34448e-13	Up	gi|405958957|gb|EKC25035.1|/8.70627e-28/hypothetical protein CGI_10020949 [Crassostrea gigas]	NA	NA	NA	NA	NA	NA
Unigene39713_All	732	0.01	2.11	7.7211	3.31916e-05	0.000182223	Up	NA	NA	NA	NA	NA	NA	NA
CL4211.Contig1_All	898	0.01	2.1	7.71425	4.21482e-06	2.6213e-05	Up	NA	NA	NA	NA	NA	NA	NA
Unigene31502_All	695	0.01	2.09	7.70736	6.60358e-05	0.000346183	Up	gi|632982208|ref|XP_007908010.1|/1.19374e-55/PREDICTED: LOW QUALITY PROTEIN: dentin sialophosphoprotein-like [Callorhinchus milii]	NA	sp|Q9NZW4|DSPP_HUMAN/1e-55/Dentin sialophosphoprotein OS=Homo sapiens GN=DSPP PE=1 SV=2	phi:102110550/1e-27/uncharacterized LOC102110550; K08899 lemur tyrosine kinase 3 [EC:2.7.10.1]	SPAC140.02/3e-10/---	NA	NA
CL2347.Contig8_All	3921	0.01	2.06	7.6865	1.60704e-25	3.17658e-24	Up	gi|405966050|gb|EKC31375.1|/0/Zinc finger RNA-binding protein [Crassostrea gigas]	gi|390346257|ref|XM_796881.3|/1e-25/PREDICTED: Strongylocentrotus purpuratus zinc finger RNA-binding protein-like, transcript variant 3 (LOC576487), partial mRNA	sp|Q96KR1|ZFR_HUMAN/0.0/Zinc finger RNA-binding protein OS=Homo sapiens GN=ZFR PE=1 SV=2	crg:105338640/0.0/zinc finger RNA-binding protein-like; K13203 zinc finger RNA-binding protein	NA	SM00355/0.66/zinc finger	NA
CL2897.Contig2_All	5650	0.01	2.02	7.65821	5.6205e-36	1.52961e-34	Up	gi|405963063|gb|EKC28669.1|/0/Sushi repeat-containing protein SRPX2 [Crassostrea gigas]	NA	sp|P0C6B8|SVEP1_RAT/4e-53/Sushi, von Willebrand factor type A, EGF and pentraxin domain-containing protein 1 OS=Rattus norvegicus GN=Svep1 PE=1 SV=1	crg:105335342/0.0/uncharacterized LOC105335342; K17495 CUB and sushi domain-containing protein	NA	PS00010/-/Aspartic acid and asparagine hydroxylation site.	NA
CL699.Contig1_All	5631	0.01	2.02	7.65821	5.6205e-36	1.52823e-34	Up	gi|431923345|gb|AGA94627.1|/0/insulin-related peptide receptor [Pinctada fucata]	gi|404553774|gb|JX661500.1|/6e-41/Chlamys farreri insulin receptor gene, partial cds	sp|O02466|ILPR_BRALA/0.0/Insulin-like peptide receptor OS=Branchiostoma lanceolatum PE=2 SV=1	crg:105348544/0.0/ir; insulin-like peptide receptor; K04527 insulin receptor [EC:2.7.10.1]	YAR019c/1e-16/---	PTHR24416:SF254/0.0/--	biological_process:GO:0009987//cellular process;molecular_function:GO:0016301//kinase activity;
CL1985.Contig2_All	709	0.01	1.99	7.63662	0.00013138	0.00065786	Up	gi|405952089|gb|EKC19939.1|/6.6341e-33/Zinc transporter ZIP10 [Crassostrea gigas]	NA	sp|Q9ULF5|S39AA_HUMAN/5e-24/Zinc transporter ZIP10 OS=Homo sapiens GN=SLC39A10 PE=1 SV=2	crg:105324287/1e-33/zinc transporter ZIP6-like; K14716 solute carrier family 39 (zinc transporter), member 10	NA	PTHR12191/1.0E-43/--	NA
CL717.Contig9_All	3204	0.01	1.98	7.62936	3.8329e-20	6.10874e-19	Up	gi|405952298|gb|EKC20127.1|/3.72186e-132/hypothetical protein CGI_10006785 [Crassostrea gigas]	NA	NA	NA	NA	PS50222/9.297/EF-hand calcium-binding domain profile.	NA
CL819.Contig1_All	3621	0.02	3.94	7.62205	2.42536e-44	8.10802e-43	Up	gi|405962021|gb|EKC27736.1|/0/Erythroid differentiation-related factor 1 [Crassostrea gigas]	gi|239585664|gb|FJ997249.1|/4e-07/Argopecten irradians microsatellite Asd024 sequence	sp|Q5R9R1|EDRF1_PONAB/0.0/Erythroid differentiation-related factor 1 OS=Pongo abelii GN=EDRF1 PE=2 SV=1	pxy:105396092/1e-12/uncharacterized LOC105396092; K15085 solute carrier family 25, member 42	NA	PTHR15000:SF1/1.1E-302/--	NA
CL1605.Contig3_All	5426	0.01	1.96	7.61471	2.7449e-33	6.93214e-32	Up	gi|405975722|gb|EKC40270.1|/0/Polyamine-modulated factor 1-binding protein 1 [Crassostrea gigas]	gi|524894581|ref|XM_005103730.1|/4e-11/PREDICTED: Aplysia californica polyamine-modulated factor 1-binding protein 1-like (LOC101858427), transcript variant X2, mRNA	sp|Q9WVQ0|PMFBP_MOUSE/9e-75/Polyamine-modulated factor 1-binding protein 1 OS=Mus musculus GN=Pmfbp1 PE=2 SV=1	crg:105345167/2e-81/centromere protein F-like; K11499 centromere protein F	YHR023w/9e-35/---	PTHR18881/4.5E-65/--	NA
Unigene35299_All	688	0.01	1.96	7.61471	0.00013138	0.000656769	Up	gi|405953305|gb|EKC20993.1|/6.24386e-33/hypothetical protein CGI_10004888 [Crassostrea gigas]	NA	NA	NA	NA	NA	NA
CL3012.Contig2_All	1222	0.01	1.94	7.59991	1.35216e-07	9.92289e-07	Up	gi|156358436|ref|XP_001624525.1|/1.14661e-12/predicted protein [Nematostella vectensis] &gt;gi|156211311|gb|EDO32425.1| predicted protein [Nematostella vectensis]	NA	sp|Q9CPW0|CNTP2_MOUSE/9e-10/Contactin-associated protein-like 2 OS=Mus musculus GN=Cntnap2 PE=1 SV=2	apla:101795189/2e-09/CNTNAP2; contactin associated protein-like 2; K07380 contactin associated protein-like 2	NA	PF00754/1.1E-10/F5/8 type C domain	NA
CL1932.Contig6_All	6097	0.01	1.94	7.59991	3.58736e-37	1.00486e-35	Up	gi|524898127|ref|XP_005105517.1|/0/PREDICTED: ras GTPase-activating-like protein IQGAP1-like isoform X1 [Aplysia californica] &gt;gi|524898129|ref|XP_005105518.1| PREDICTED: ras GTPase-activating-like protein IQGAP1-like isoform X2 [Aplysia californica] &gt;gi|524898131|ref|XP_005105519.1| PREDICTED: ras GTPase-activating-like protein IQGAP1-like isoform X3 [Aplysia californica] &gt;gi|524898133|…	gi|560950353|ref|XM_006197665.1|/1e-17/PREDICTED: Vicugna pacos IQ motif containing GTPase activating protein 2 (IQGAP2), mRNA	sp|Q9JKF1|IQGA1_MOUSE/0.0/Ras GTPase-activating-like protein IQGAP1 OS=Mus musculus GN=Iqgap1 PE=1 SV=2	crg:105346947/0.0/ras GTPase-activating-like protein IQGAP1; K16848 Ras GTPase-activating-like protein IQGAP1	SPAC4F8.13c/3e-100/---	PF00612/5.9E-5/IQ calmodulin-binding motif	NA
CL732.Contig3_All	3587	0.01	1.94	7.59991	6.18056e-22	1.06193e-20	Up	gi|405966454|gb|EKC31738.1|/2.91287e-32/hypothetical protein CGI_10008997 [Crassostrea gigas]	NA	sp|Q502K3|ANR52_DANRE/1e-14/Serine/threonine-protein phosphatase 6 regulatory ankyrin repeat subunit C OS=Danio rerio GN=ankrd52 PE=2 SV=1	dre:553206/2e-13/ankrd52a, ankrd52, zgc:112069; ankyrin repeat domain 52a; K15504 serine/threonine-protein phosphatase 6 regulatory ankyrin repeat subunit C	all2748/3e-11/---	SM00248/7.1E-4/ankyrin repeats	NA
Unigene45757_All	845	0.01	1.93	7.59246	1.66832e-05	9.5749e-05	Up	gi|957315|gb|AAB34577.1|/5.81537e-59/Myc homolog [Crassostrea virginica]	NA	sp|Q09662|YS51_CAEEL/2e-06/Uncharacterized protein ZK673.1 OS=Caenorhabditis elegans GN=ZK673.1 PE=4 SV=2	crg:105329078/1e-40/uncharacterized LOC105329078; K05719 integrin beta 1; K06238 collagen, type VI, alpha	NA	PS51670/7.103/ShKT domain profile.	NA
CL450.Contig2_All	3026	0.01	1.93	7.59246	2.377e-18	3.49554e-17	Up	gi|405977996|gb|EKC42415.1|/0/Uncharacterized protein C17orf66 [Crassostrea gigas]	NA	sp|A2RTY3|CQ066_HUMAN/5e-26/Uncharacterized protein C17orf66 OS=Homo sapiens GN=C17orf66 PE=2 SV=2	NA	NA	PTHR12697/6.1E-20/--	NA
CL1451.Contig5_All	1425	0.01	1.92	7.58496	8.63036e-09	7.07174e-08	Up	gi|556095740|gb|ESO84393.1|/4.24646e-57/hypothetical protein LOTGIDRAFT_236344 [Lottia gigantea]	NA	sp|Q9CQM0|NICN1_MOUSE/2e-40/Nicolin-1 OS=Mus musculus GN=Nicn1 PE=1 SV=1	crg:105334891/7e-81/nicolin-1-like; K16607 nicolin-1	NA	PTHR31239/1.1E-64/--	molecular_function:GO:0016740//transferase activity;
CL526.Contig2_All	2069	0.01	1.91	7.57743	1.12792e-12	1.21773e-11	Up	NA	NA	NA	NA	NA	NA	NA
CL2690.Contig4_All	740	0.01	1.91	7.57743	0.00013138	0.000656606	Up	NA	NA	NA	NA	NA	NA	NA
CL3073.Contig2_All	4188	0.01	1.9	7.56986	3.19726e-25	6.25025e-24	Up	gi|405951097|gb|EKC19039.1|/0/Delta-like protein 1 [Crassostrea gigas]	gi|543345626|ref|XM_005518569.1|/3e-11/PREDICTED: Pseudopodoces humilis delta-like 1 (Drosophila) (DLL1), mRNA	sp|P10041|DL_DROME/4e-174/Neurogenic locus protein delta OS=Drosophila melanogaster GN=Dl PE=1 SV=2	crg:105325787/0.0/delta-like protein 1; K06051 delta; K06816 golgi apparatus protein 1	NA	PS01187/-/Calcium-binding EGF-like domain signature.	NA
Unigene38375_All	706	0.01	1.9	7.56986	0.00013138	0.000658243	Up	gi|390359296|ref|XP_003729450.1|/3.2451e-48/PREDICTED: uncharacterized protein LOC100888344 [Strongylocentrotus purpuratus]	NA	NA	NA	NA	NA	NA
Unigene7729_All	710	0.01	1.89	7.56224	0.00013138	0.000656878	Up	NA	NA	NA	NA	NA	NA	NA
CL4124.Contig2_All	2093	0.01	1.88	7.55459	1.12792e-12	1.21752e-11	Up	gi|597782890|ref|XP_007254980.1|/1.06937e-174/PREDICTED: mitogen-activated protein kinase kinase kinase 7 isoform X3 [Astyanax mexicanus]	gi|632933445|gb|KJ513265.1|/3e-65/Mytilus galloprovincialis transforming growth factor activated kinase-1 mRNA, complete cds	sp|A2VDU3|M3K7_BOVIN/9e-171/Mitogen-activated protein kinase kinase kinase 7 OS=Bos taurus GN=MAP3K7 PE=2 SV=1	crg:105332318/0.0/mitogen-activated protein kinase kinase kinase 7-like; K04427 mitogen-activated protein kinase kinase kinase 7 [EC:2.7.11.25]	YAR019c/2e-23/---	PS50011/44.569/Protein kinase domain profile.	NA
Unigene43304_All	821	0.01	1.87	7.54689	3.31916e-05	0.000182822	Up	gi|405964448|gb|EKC29934.1|/1.24521e-34/hypothetical protein CGI_10008534 [Crassostrea gigas]	NA	NA	NA	NA	NA	NA
CL364.Contig11_All	3802	0.01	1.87	7.54689	1.56145e-22	2.74942e-21	Up	gi|405975833|gb|EKC40375.1|/1.52352e-63/Doublecortin domain-containing protein 2 [Crassostrea gigas]	NA	sp|D3ZR10|DCDC2_RAT/5e-26/Doublecortin domain-containing protein 2 OS=Rattus norvegicus GN=Dcdc2 PE=4 SV=1	lcm:102352066/1e-24/MYO3A; myosin IIIA; K08834 myosin III [EC:2.7.11.1]	NA	PTHR23004/8.9E-29/--	NA
CL2633.Contig1_All	3595	0.01	1.79	7.48382	1.92654e-20	3.11406e-19	Up	gi|405968434|gb|EKC33506.1|/0/Myosin-IIIB [Crassostrea gigas]	gi|585705677|ref|XM_006823621.1|/5e-25/PREDICTED: Saccoglossus kowalevskii myosin-IIIa-like (LOC102806069), mRNA	sp|Q1EG27|MYO3B_MOUSE/4e-163/Myosin-IIIb OS=Mus musculus GN=Myo3b PE=2 SV=2	spu:587143/1e-170/MYO16; unconventional myosin-XVI; K17481 myosin XVI	YOR326w/1e-135/---	PF00063/3.8E-213/Myosin head (motor domain)	NA
Unigene47777_All	908	0.01	1.79	7.48382	1.66832e-05	9.56671e-05	Up	gi|405977366|gb|EKC41823.1|/7.29286e-90/E3 ubiquitin-protein ligase MIB2 [Crassostrea gigas]	NA	sp|Q5ZIJ9|MIB2_CHICK/4e-67/E3 ubiquitin-protein ligase MIB2 OS=Gallus gallus GN=MIB2 PE=2 SV=1	crg:105326496/2e-90/E3 ubiquitin-protein ligase MIB2-like; K10645 E3 ubiquitin-protein ligase mind-bomb [EC:2.3.2.27]	NA	PF06701/1.0E-15/Mib_herc2	NA
Unigene41585_All	1721	0.01	1.76	7.45943	1.09592e-09	9.64717e-09	Up	NA	NA	NA	NA	NA	NA	NA
CL2579.Contig2_All	860	0.01	1.73	7.43463	6.60358e-05	0.000347118	Up	gi|405966105|gb|EKC31425.1|/2.43677e-68/Histone-lysine N-methyltransferase, H3 lysine-36 and H4 lysine-20 specific [Crassostrea gigas]	NA	sp|Q9BZ95|NSD3_HUMAN/3e-55/Histone-lysine N-methyltransferase NSD3 OS=Homo sapiens GN=WHSC1L1 PE=1 SV=1	crg:105340795/5e-69/histone-lysine N-methyltransferase NSD2-like; K11424 histone-lysine N-methyltransferase NSD2 [EC:2.1.1.43]	YHR090c/2e-06/---	PTHR22884:SF301/2.6E-37/--	NA
CL4061.Contig2_All	927	0.01	1.73	7.43463	3.31916e-05	0.000182422	Up	NA	NA	NA	NA	NA	NA	NA
CL3485.Contig2_All	919	0.01	1.71	7.41785	3.31916e-05	0.000182555	Up	NA	NA	NA	NA	NA	NA	NA
CL2328.Contig3_All	607	0.52	88.26	7.4071	7.18008e-149	8.64304e-147	Up	NA	gi|619853958|gb|KJ101557.1|/1e-43/Argopecten irradians FREP2 (FREP2) mRNA, complete cds	NA	NA	NA	NA	NA
CL5330.Contig2_All	1610	0.01	1.68	7.39232	8.63036e-09	7.07078e-08	Up	gi|405977269|gb|EKC41728.1|/7.95538e-63/hypothetical protein CGI_10028475 [Crassostrea gigas]	NA	NA	NA	NA	NA	NA
CL2919.Contig3_All	2293	0.05	8.39	7.3906	2.77222e-57	1.21945e-55	Up	gi|556107378|gb|ESO96030.1|/7.16201e-95/hypothetical protein LOTGIDRAFT_214616 [Lottia gigantea]	gi|585643459|ref|XM_006811288.1|/1e-06/PREDICTED: Saccoglossus kowalevskii mechanosensory protein 2-like (LOC100378942), mRNA	sp|Q27433|MEC2_CAEEL/4e-92/Mechanosensory protein 2 OS=Caenorhabditis elegans GN=mec-2 PE=1 SV=1	crg:105320776/9e-98/mechanosensory protein 2-like; K17286 erythrocyte band 7 integral membrane protein	AF1420/2e-59/---	PTHR10264/4.4E-159/--	cellular_component:GO:0016021//integral component of membrane;
CL2551.Contig3_All	1425	0.01	1.67	7.3837	6.7964e-08	5.13245e-07	Up	gi|198412499|ref|XP_002124036.1|/5.01619e-58/PREDICTED: uncharacterized protein LOC100178184, partial [Ciona intestinalis]	NA	NA	api:100162380/5e-10/tetraspanin-33-like; K17346 tetraspanin-33	NA	PF09588/7.5E-16/YqaJ-like viral recombinase domain	NA
CL1656.Contig4_All	1226	0.01	1.66	7.37504	1.06483e-06	7.11001e-06	Up	gi|405951532|gb|EKC19436.1|/2.75059e-115/CAP-Gly domain-containing linker protein 1 [Crassostrea gigas]	gi|395513802|ref|XM_003761064.1|/8e-06/PREDICTED: Sarcophilus harrisii CAP-GLY domain containing linker protein 1 (CLIP1), mRNA	sp|P30622|CLIP1_HUMAN/2e-70/CAP-Gly domain-containing linker protein 1 OS=Homo sapiens GN=CLIP1 PE=1 SV=2	crg:105332649/1e-127/CAP-Gly domain-containing linker protein 1-like; K10421 CAP-Gly domain-containing linker protein 1	SPAC27D7.13c/4e-12/---	SM01052/3.0E-30/--	NA
CL717.Contig7_All	3191	0.01	1.61	7.33092	2.93278e-16	3.88982e-15	Up	gi|405952298|gb|EKC20127.1|/3.70566e-132/hypothetical protein CGI_10006785 [Crassostrea gigas]	NA	NA	NA	NA	PS50222/9.297/EF-hand calcium-binding domain profile.	NA
Unigene32868_All	831	0.01	1.6	7.32193	0.00013138	0.000657751	Up	gi|260807884|ref|XP_002598738.1|/2.75166e-21/hypothetical protein BRAFLDRAFT_95854 [Branchiostoma floridae] &gt;gi|229284012|gb|EEN54750.1| hypothetical protein BRAFLDRAFT_95854 [Branchiostoma floridae]	NA	sp|P86179|CSL3_ONCKE/1e-17/L-rhamnose-binding lectin CSL3 OS=Oncorhynchus keta PE=1 SV=1	xtr:100494313/4e-12/adgrl2, lphn2; adhesion G protein-coupled receptor L2; K04593 latrophilin 2	NA	PTHR12011/2.3E-31/--	NA
CL1251.Contig2_All	1619	0.01	1.57	7.29462	3.41608e-08	2.65794e-07	Up	gi|524883552|ref|XP_005098403.1|/2.94822e-50/PREDICTED: ERI1 exoribonuclease 3-like [Aplysia californica]	NA	sp|A6QLH5|ERI3_BOVIN/1e-46/ERI1 exoribonuclease 3 OS=Bos taurus GN=ERI3 PE=2 SV=1	crg:105327959/8e-48/ERI1 exoribonuclease 3-like; K18418 ERI1 exoribonuclease 3 [EC:3.1.-.-]	SPBC30B4.08/2e-06/---	PF00929/2.9E-16/Exonuclease	NA
Unigene21582_All	2019	0.01	1.55	7.27612	5.50844e-10	4.95013e-09	Up	NA	NA	NA	NA	NA	NA	NA
CL537.Contig1_All	1499	0.01	1.51	7.2384	2.69016e-07	1.91726e-06	Up	NA	NA	NA	NA	NA	NA	NA
CL3002.Contig2_All	1029	0.01	1.49	7.21917	3.31916e-05	0.000182805	Up	gi|405968086|gb|EKC33188.1|/2.96003e-109/Protein FAM40A [Crassostrea gigas]	gi|541959575|ref|XM_005435473.1|/7e-06/PREDICTED: Falco cherrug striatin interacting protein 2 (STRIP2), mRNA	sp|Q8C079|STRP1_MOUSE/3e-76/Striatin-interacting protein 1 OS=Mus musculus GN=Strip1 PE=1 SV=2	NA	NA	PTHR13239/3.0E-103/--	NA
Unigene39362_All	877	0.12	17.88	7.21917	7.7158e-45	2.59523e-43	Up	NA	NA	NA	NA	NA	NA	NA
CL732.Contig1_All	3182	0.01	1.49	7.21917	4.59492e-15	5.71244e-14	Up	gi|405966454|gb|EKC31738.1|/3.67842e-31/hypothetical protein CGI_10008997 [Crassostrea gigas]	NA	sp|Q502K3|ANR52_DANRE/1e-14/Serine/threonine-protein phosphatase 6 regulatory ankyrin repeat subunit C OS=Danio rerio GN=ankrd52 PE=2 SV=1	dre:553206/2e-13/ankrd52a, ankrd52, zgc:112069; ankyrin repeat domain 52a; K15504 serine/threonine-protein phosphatase 6 regulatory ankyrin repeat subunit C	all2748/3e-11/---	SM00248/7.1E-4/ankyrin repeats	NA
Unigene41277_All	1258	0.08	11.91	7.21796	1.17808e-43	3.87602e-42	Up	NA	NA	NA	NA	NA	NA	NA
CL30.Contig1_All	1573	0.01	1.48	7.20945	1.35216e-07	9.91324e-07	Up	gi|405966262|gb|EKC31569.1|/4.25198e-45/Deleted in malignant brain tumors 1 protein [Crassostrea gigas]	NA	sp|O75096|LRP4_HUMAN/2e-26/Low-density lipoprotein receptor-related protein 4 OS=Homo sapiens GN=LRP4 PE=1 SV=4	crg:105332379/2e-45/deleted in malignant brain tumors 1 protein-like; K13912 deleted in malignant brain tumors 1 protein	NA	PF00530/3.0E-18/Scavenger receptor cysteine-rich domain	NA
CL3310.Contig3_All	2658	0.01	1.47	7.19967	1.12792e-12	1.21817e-11	Up	gi|405976301|gb|EKC40813.1|/1.18046e-128/Splicing factor, arginine/serine-rich 18 [Crassostrea gigas]	gi|585690804|ref|XM_006821071.1|/5e-06/PREDICTED: Saccoglossus kowalevskii arginine/serine-rich protein PNISR-like (LOC100367024), mRNA	sp|Q8TF01|PNISR_HUMAN/6e-90/Arginine/serine-rich protein PNISR OS=Homo sapiens GN=PNISR PE=1 SV=2	crg:105345297/1e-172/arginine/serine-rich protein PNISR-like; K13170 splicing factor, arginine/serine-rich 18	SPAC140.02/4e-14/---	NA	NA
CL2184.Contig2_All	2041	0.01	1.4	7.12928	2.18036e-09	1.87928e-08	Up	gi|405963295|gb|EKC28882.1|/1.56041e-29/hypothetical protein CGI_10009228 [Crassostrea gigas]	NA	NA	NA	NA	NA	NA
CL209.Contig5_All	5515	0.02	2.8	7.12928	2.55414e-46	8.88835e-45	Up	gi|405953685|gb|EKC21299.1|/1.09764e-166/Regulator of differentiation 1 [Crassostrea gigas]	gi|512910081|ref|XM_004927023.1|/7e-19/PREDICTED: Bombyx mori polypyrimidine tract-binding protein 3-like (LOC101740192), mRNA	sp|O95758|PTBP3_HUMAN/1e-142/Polypyrimidine tract-binding protein 3 OS=Homo sapiens GN=PTBP3 PE=1 SV=2	aec:105143854/6e-154/polypyrimidine tract-binding protein 1; K14948 polypyrimidine tract-binding protein 2	NA	PS50102/12.509/Eukaryotic RNA Recognition Motif (RRM) profile.	NA
CL4146.Contig1_All	2159	0.01	1.4	7.12928	1.09592e-09	9.65139e-09	Up	gi|405961924|gb|EKC27657.1|/0/Microtubule-actin cross-linking factor 1, isoforms 1/2/3/5, partial [Crassostrea gigas]	NA	sp|D3ZHV2|MACF1_RAT/2e-120/Microtubule-actin cross-linking factor 1 OS=Rattus norvegicus GN=Macf1 PE=1 SV=1	crg:105327339/0.0/microtubule-actin cross-linking factor 1, isoforms 1/2/3/5-like; K10382 dystonin	NA	SM00243/2.6E-35/Growth-Arrest-Specific Protein 2 Domain	NA
CL1671.Contig2_All	1187	0.01	1.39	7.11894	1.66832e-05	9.57763e-05	Up	gi|405969584|gb|EKC34546.1|/2.79743e-24/Sodium/hydrogen exchanger 9 [Crassostrea gigas]	NA	sp|P13536|ACHG_BOVIN/3e-23/Acetylcholine receptor subunit gamma OS=Bos taurus GN=CHRNG PE=2 SV=1	phd:102344415/4e-23/CHRNG; cholinergic receptor, nicotinic, gamma (muscle); K04818 nicotinic acetylcholine receptor gamma	NA	PF02931/2.4E-40/Neurotransmitter-gated ion-channel ligand binding domain	NA
CL2682.Contig2_All	1842	0.01	1.39	7.11894	3.41608e-08	2.65554e-07	Up	gi|405959577|gb|EKC25597.1|/4.7484e-06/Ankyrin repeat domain-containing protein 54 [Crassostrea gigas]	NA	NA	NA	NA	PS50017/8.738/Death domain profile.	NA
CL414.Contig6_All	2894	0.01	1.38	7.10852	1.12792e-12	1.2173e-11	Up	gi|405969360|gb|EKC34336.1|/4.14414e-42/hypothetical protein CGI_10023442 [Crassostrea gigas]	NA	sp|Q6DFF2|BRD4B_XENLA/2e-12/Bromodomain-containing protein 4B OS=Xenopus laevis GN=brd4-b PE=2 SV=1	dre:553531/3e-15/srrm2, zgc:110023; serine/arginine repetitive matrix 2; K13172 serine/arginine repetitive matrix protein 2	NA	NA	NA
CL1922.Contig2_All	3132	0.1	13.57	7.08428	9.7622e-125	9.77971e-123	Up	gi|405965094|gb|EKC30516.1|/3.56824e-71/Chloride intracellular channel exc-4 [Crassostrea gigas]	NA	sp|Q5R957|CLIC4_PONAB/1e-22/Chloride intracellular channel protein 4 OS=Pongo abelii GN=CLIC4 PE=2 SV=3	mze:101475901/1e-22/clic4; chloride intracellular channel 4; K05024 chloride intracellular channel protein 4	NA	PTHR11260:SF76/8.8E-33/--	NA
CL1474.Contig1_All	2761	0.01	1.35	7.07682	4.46456e-12	4.63503e-11	Up	NA	NA	NA	NA	NA	NA	NA
CL231.Contig7_All	2609	0.03	4	7.05889	2.1616e-32	5.31655e-31	Up	gi|405977608|gb|EKC42050.1|/7.16105e-46/Lymphocyte cytosolic protein 2 [Crassostrea gigas]	NA	sp|Q9YGC1|BLNK_CHICK/9e-27/B-cell linker protein OS=Gallus gallus GN=BLNK PE=1 SV=1	amj:102573203/6e-31/BLNK; B-cell linker; K07371 B-cell linker protein	slr0744/4e-13/---	PTHR14098/6.8E-17/--	NA
CL2144.Contig6_All	5257	0.01	1.31	7.03342	6.18056e-22	1.06163e-20	Up	gi|405952290|gb|EKC20120.1|/0/Armadillo repeat protein deleted in velo-cardio-facial syndrome-like protein [Crassostrea gigas]	NA	sp|Q99569|PKP4_HUMAN/7e-104/Plakophilin-4 OS=Homo sapiens GN=PKP4 PE=1 SV=2	tgu:100226746/3e-94/CTNND1; catenin (cadherin-associated protein), delta 1; K05690 catenin (cadherin-associated protein), delta 1	NA	PTHR10372/2.7E-196/--	NA
CL764.Contig1_All	5651	0.01	1.29	7.01123	3.94482e-23	7.10374e-22	Up	gi|405952266|gb|EKC20098.1|/0/Protein hu-li tai shao [Crassostrea gigas]	NA	sp|Q02645|HTS_DROME/1e-144/Protein hu-li tai shao OS=Drosophila melanogaster GN=hts PE=1 SV=2	crg:105327307/0.0/alpha-adducin-like; K18622 adducin	CC1201/6e-45/---	PTHR10672/0.0/--	NA
CL1387.Contig7_All	1550	0.01	1.28	7	1.06483e-06	7.11159e-06	Up	gi|403337413|gb|EJY67920.1|/1.82681e-08/hypothetical protein OXYTRI_11566 [Oxytricha trifallax]	NA	NA	xma:102229326/1e-07/ubiquitin carboxyl-terminal hydrolase 8-like; K11839 ubiquitin carboxyl-terminal hydrolase 8 [EC:3.4.19.12]	NA	NA	NA
CL12.Contig3_All	1919	0.01	1.23	6.94251	6.7964e-08	5.13116e-07	Up	gi|321474916|gb|EFX85880.1|/4.54089e-116/hypothetical protein DAPPUDRAFT_20224 [Daphnia pulex]	gi|345497984|ref|XM_001603163.2|/1e-08/PREDICTED: Nasonia vitripennis nucleolysin TIA-1 isoform p40-like (LOC100119433), mRNA	sp|P70318|TIAR_MOUSE/1e-101/Nucleolysin TIAR OS=Mus musculus GN=Tial1 PE=1 SV=1	crg:105320706/2e-149/nucleolysin TIAR-like; K13201 nucleolysin TIA-1/TIAR	SPAC17A2.09c/6e-27/---	PTHR24012/7.9E-169/--	NA
CL1932.Contig8_All	6058	0.01	1.21	6.91886	1.98279e-23	3.6181e-22	Up	gi|524898127|ref|XP_005105517.1|/0/PREDICTED: ras GTPase-activating-like protein IQGAP1-like isoform X1 [Aplysia californica] &gt;gi|524898129|ref|XP_005105518.1| PREDICTED: ras GTPase-activating-like protein IQGAP1-like isoform X2 [Aplysia californica] &gt;gi|524898131|ref|XP_005105519.1| PREDICTED: ras GTPase-activating-like protein IQGAP1-like isoform X3 [Aplysia californica] &gt;gi|524898133|…	gi|560950353|ref|XM_006197665.1|/1e-17/PREDICTED: Vicugna pacos IQ motif containing GTPase activating protein 2 (IQGAP2), mRNA	sp|Q9JKF1|IQGA1_MOUSE/0.0/Ras GTPase-activating-like protein IQGAP1 OS=Mus musculus GN=Iqgap1 PE=1 SV=2	crg:105346947/0.0/ras GTPase-activating-like protein IQGAP1; K16848 Ras GTPase-activating-like protein IQGAP1	SPAC4F8.13c/3e-100/---	PS50096/9.761/IQ motif profile.	NA
CL3010.Contig5_All	1305	0.01	1.2	6.90689	3.31916e-05	0.000182539	Up	gi|556101662|gb|ESO90314.1|/7.63246e-34/hypothetical protein LOTGIDRAFT_164234 [Lottia gigantea]	NA	sp|O95786|DDX58_HUMAN/1e-30/Probable ATP-dependent RNA helicase DDX58 OS=Homo sapiens GN=DDX58 PE=1 SV=2	crg:105319712/2e-34/interferon-induced helicase C domain-containing protein 1-like; K12647 interferon-induced helicase C domain-containing protein 1 [EC:3.6.4.13]	SPAC20H4.04/1e-08/---	PF00270/4.6E-17/DEAD/DEAH box helicase	NA
Unigene31434_All	1871	0.09	10.59	6.87856	9.11702e-59	4.13095e-57	Up	NA	NA	NA	NA	NA	NA	NA
CL887.Contig1_All	1191	0.01	1.14	6.83289	0.00013138	0.000656933	Up	gi|405950067|gb|EKC18074.1|/4.44221e-54/Sal-like protein 1 [Crassostrea gigas]	gi|545196188|ref|XM_005603211.1|/8e-06/PREDICTED: Equus caballus sal-like 2 (Drosophila) (SALL2), transcript variant X2, mRNA	sp|Q9NSC2|SALL1_HUMAN/3e-36/Sal-like protein 1 OS=Homo sapiens GN=SALL1 PE=1 SV=2	dgr:Dgri_GH18919/2e-06/GH18919 gene product from transcript GH18919-RA; K09200 transcription factor Sp, invertebrate	NA	PS00028/-/Zinc finger C2H2 type domain signature.	biological_process:GO:0048513//organ development;GO:0006355//regulation of transcription, DNA-templated;molecular_function:GO:0005515//protein binding;
Unigene34781_All	1840	0.05	5.35	6.74147	6.8681e-29	1.5228e-27	Up	gi|405963611|gb|EKC29173.1|/1.87057e-111/Heat shock 70 kDa protein 12B [Crassostrea gigas]	NA	sp|O43301|HS12A_HUMAN/8e-80/Heat shock 70 kDa protein 12A OS=Homo sapiens GN=HSPA12A PE=1 SV=2	aqu:100633272/1e-32/uncharacterized LOC100633272; K10380 ankyrin	PA4761/5e-08/---	PTHR14187/1.2E-107/--	NA
CL656.Contig11_All	3505	0.01	1.07	6.74147	4.46456e-12	4.63582e-11	Up	gi|524913305|ref|XP_005111484.1|/6.70367e-175/PREDICTED: serine/threonine-protein kinase 25-like isoform X4 [Aplysia californica]	gi|157104976|ref|XM_001648608.1|/1e-25/Aedes aegypti serine/threonine protein kinase partial mRNA	sp|Q9Y6E0|STK24_HUMAN/9e-139/Serine/threonine-protein kinase 24 OS=Homo sapiens GN=STK24 PE=1 SV=1	crg:105323719/4e-160/serine/threonine-protein kinase 24-like; K08838 serine/threonine-protein kinase 24/25/MST4 [EC:2.7.11.1]	YAR019c/2e-40/---	PTHR24361/6.9E-228/--	NA
Unigene45446_All	1794	0.01	1.03	6.6865	4.21482e-06	2.62211e-05	Up	NA	gi|597438749|emb|CU694210.18|/2e-26/Zebrafish DNA sequence from clone CH73-52D20 in linkage group 16, complete sequence	NA	NA	NA	NA	NA
CL1318.Contig2_All	2058	0.18	18.08	6.65025	6.87934e-108	5.92685e-106	Up	gi|221219676|gb|ACM08499.1|/2.26901e-36/GTPase IMAP family member 7 [Salmo salar]	NA	sp|Q9NUV9|GIMA4_HUMAN/3e-31/GTPase IMAP family member 4 OS=Homo sapiens GN=GIMAP4 PE=1 SV=1	aga:AgaP_AGAP013287/1e-07/AGAP013287-PA; K17335 nuclear factor of activated T-cells 5	L96658_2/7e-06/---	PTHR10903/1.1E-48/--	NA
Unigene31293_All	2522	0.01	0.98	6.61471	3.41608e-08	2.6576e-07	Up	gi|405951527|gb|EKC19432.1|/1.77932e-118/Inositol-trisphosphate 3-kinase C [Crassostrea gigas]	NA	sp|P42335|IP3KB_RAT/4e-60/Inositol-trisphosphate 3-kinase B OS=Rattus norvegicus GN=Itpkb PE=1 SV=3	crg:105335845/4e-119/inositol-trisphosphate 3-kinase A-like; K00911 1D-myo-inositol-triphosphate 3-kinase [EC:2.7.1.127]	NA	PTHR12400/4.5E-110/--	NA
CL3204.Contig1_All	3280	0.01	0.97	6.59991	2.76872e-10	2.5411e-09	Up	gi|405966276|gb|EKC31583.1|/0/Paired box protein Pax-6 [Crassostrea gigas]	gi|126671098|gb|EF394359.2|/2e-21/Helobdella sp. MS-2000 isolate Austin paired box 6B transcription factor (Pax6B) mRNA, partial cds	sp|P26630|PAX6_DANRE/6e-140/Paired box protein Pax-6 OS=Danio rerio GN=pax6a PE=2 SV=1	crg:105332393/0.0/paired box protein Pax-6-like; K08031 paired box protein 6	SPAC32A11.03c/1e-06/---	PTHR24329:SF266/1.9E-204/--	biological_process:GO:0006351//transcription, DNA-templated;molecular_function:GO:0003677//DNA binding;
CL2400.Contig2_All	2948	0.01	0.93	6.53916	4.3379e-09	3.63853e-08	Up	gi|405960584|gb|EKC26497.1|/5.39246e-130/Branched-chain-amino-acid aminotransferase [Crassostrea gigas]	gi|524873518|ref|XM_005093448.1|/2e-23/PREDICTED: Aplysia californica transcription factor SOX-8-like (LOC101861793), mRNA	sp|B1H349|SOX6_XENTR/2e-50/Transcription factor Sox-6 OS=Xenopus tropicalis GN=sox6 PE=2 SV=1	crg:105326856/0.0/transcription factor SOX-5-like; K09269 transcription factor SOX5/6/13 (SOX group D)	YPR052c/3e-07/---	PS50118/20.558/HMG boxes A and B DNA-binding domains profile.	NA
Unigene31682_All	785	0.13	11.89	6.51509	3.06112e-26	6.20955e-25	Up	NA	NA	NA	NA	NA	NA	NA
CL719.Contig3_All	2072	0.01	0.91	6.50779	2.1185e-06	1.37335e-05	Up	gi|556110051|gb|ESO98703.1|/3.11666e-09/hypothetical protein LOTGIDRAFT_158652 [Lottia gigantea]	NA	sp|Q04832|HEXP_LEIMA/6e-10/DNA-binding protein HEXBP OS=Leishmania major GN=HEXBP PE=4 SV=1	hgl:101725388/1e-08/Zcchc13; zinc finger, CCHC domain containing 13; K09250 cellular nucleic acid-binding protein	YNL255c/9e-09/---	PS50158/9.059/Zinc finger CCHC-type profile.	NA
CL805.Contig13_All	3668	0.01	0.9	6.49185	6.99486e-11	6.73123e-10	Up	gi|405965222|gb|EKC30619.1|/0/Centrosome and spindle pole-associated protein 1 [Crassostrea gigas]	NA	sp|Q1MSJ5|CSPP1_HUMAN/1e-85/Centrosome and spindle pole-associated protein 1 OS=Homo sapiens GN=CSPP1 PE=1 SV=4	crg:105330303/0.0/trichohyalin-like; K16771 centrosome and spindle pole-associated protein 1	DR1549/6e-09/---	PTHR21616/4.6E-103/--	NA
CL1224.Contig2_All	1558	0.01	0.89	6.47573	0.00013138	0.000657587	Up	gi|405963192|gb|EKC28789.1|/4.75979e-26/von Willebrand factor D and EGF domain-containing protein [Crassostrea gigas]	NA	NA	NA	NA	NA	NA
CL865.Contig6_All	3857	0.01	0.89	6.47573	3.51584e-11	3.45444e-10	Up	gi|405972170|gb|EKC36956.1|/0/Rho guanine nucleotide exchange factor 12 [Crassostrea gigas]	NA	sp|O15085|ARHGB_HUMAN/6e-112/Rho guanine nucleotide exchange factor 11 OS=Homo sapiens GN=ARHGEF11 PE=1 SV=1	crg:105330610/0.0/rho guanine nucleotide exchange factor 11-like; K12331 Rho guanine nucleotide exchange factor 11	SPAC1006.06/2e-16/---	SM00325/4.5E-40/Guanine nucleotide exchange factor for Rho/Rac/Cdc42-like GTPases	NA
CL560.Contig6_All	1948	0.01	0.86	6.42626	8.3855e-06	5.00458e-05	Up	gi|506969305|gb|AGM32996.1|/4.49343e-20/deoxycytidylate deaminase-like protein [Coptotermes formosanus]	NA	sp|Q5M9G0|DCTD_RAT/9e-16/Deoxycytidylate deaminase OS=Rattus norvegicus GN=Dctd PE=2 SV=1	spu:575919/4e-18/deoxycytidylate deaminase; K01493 dCMP deaminase [EC:3.5.4.12]	FN1902/4e-13/---	NA	molecular_function:GO:0003824//catalytic activity;
CL1387.Contig9_All	2769	0.01	0.84	6.39232	1.35216e-07	9.92048e-07	Up	gi|260814858|ref|XP_002602130.1|/1.08259e-15/hypothetical protein BRAFLDRAFT_128459 [Branchiostoma floridae] &gt;gi|229287437|gb|EEN58142.1| hypothetical protein BRAFLDRAFT_128459 [Branchiostoma floridae]	NA	NA	aqu:100641207/6e-08/trichohyalin-like; K16771 centrosome and spindle pole-associated protein 1	NA	NA	NA
CL1566.Contig2_All	4121	0.05	4.19	6.38888	2.72224e-50	1.04369e-48	Up	gi|405956006|gb|EKC22872.1|/9.56368e-144/hypothetical protein CGI_10001342 [Crassostrea gigas]	NA	sp|Q86SQ4|GP126_HUMAN/1e-61/G-protein coupled receptor 126 OS=Homo sapiens GN=GPR126 PE=1 SV=3	crg:105336561/2e-167/G-protein coupled receptor 126-like; K08463 G protein-coupled receptor 126	NA	PTHR12011:SF260/6.9E-128/--	NA
CL201.Contig2_All	1855	0.01	0.83	6.37504	3.31916e-05	0.000182789	Up	gi|209867655|gb|ACI90344.1|/1.06663e-13/Smc-like protein [Philodina roseola]	gi|309256118|gb|HQ197426.1|/4e-15/Argopecten purpuratus clone B123 microsatellite sequence	sp|P08799|MYS2_DICDI/2e-10/Myosin-2 heavy chain OS=Dictyostelium discoideum GN=mhcA PE=1 SV=3	crg:105345167/4e-12/centromere protein F-like; K11499 centromere protein F	PH0929/7e-12/---	NA	NA
Unigene39986_All	1646	0.06	4.98	6.37504	6.87474e-24	1.27609e-22	Up	gi|405961549|gb|EKC27337.1|/2.06377e-82/Putative G-protein coupled receptor 45 [Crassostrea gigas]	NA	sp|P79945|PSP24_XENLA/8e-68/High-affinity lysophosphatidic acid receptor OS=Xenopus laevis PE=2 SV=1	crg:105344545/4e-83/high-affinity lysophosphatidic acid receptor-like; K08409 G protein-coupled receptor 45	NA	PTHR24245:SF0/6.7E-122/--	NA
CL3703.Contig2_All	1764	0.01	0.81	6.33985	6.60358e-05	0.000346756	Up	gi|405965466|gb|EKC30839.1|/3.42638e-147/Kyphoscoliosis peptidase [Crassostrea gigas]	NA	sp|Q8NBH2|KY_HUMAN/4e-15/Kyphoscoliosis peptidase OS=Homo sapiens GN=KY PE=1 SV=2	smm:Smp_133510/2e-15/aldehyde dehydrogenase; K14786 protein KRI1	sll1681/2e-17/---	PTHR11039/1.1E-33/--	NA
CL1337.Contig3_All	1810	0.01	0.79	6.30378	6.60358e-05	0.000346997	Up	gi|89255269|dbj|BAE80716.1|/0/taurine transporter [Crassostrea gigas]	gi|284010100|dbj|AB513188.1|/2e-29/Bathymodiolus platifrons TAUT mRNA for taurine transporter, complete cds, country: Japan: Sagami Bay	sp|Q8VBW1|SC6A8_MOUSE/6e-152/Sodium- and chloride-dependent creatine transporter 1 OS=Mus musculus GN=Slc6a8 PE=2 SV=1	crg:105325240/0.0/taut; sodium- and chloride-dependent taurine transporter-like; K05039 solute carrier family 6 (neurotransmitter transporter, GABA) member 6/8/11/12/13	MA1518/2e-45/---	PR00176/3.0E-60/Sodium/chloride neurotransmitter symporter signature	NA
CL456.Contig3_All	2194	0.01	0.76	6.24793	1.66832e-05	9.56307e-05	Up	gi|405969074|gb|EKC34084.1|/0/Spermatogenesis-associated protein 18-like protein [Crassostrea gigas]	gi|524875820|ref|XM_005094576.1|/3e-16/PREDICTED: Aplysia californica mitochondria-eating protein-like (LOC101857320), mRNA	sp|Q503Q1|MIEAP_DANRE/2e-119/Mitochondria-eating protein OS=Danio rerio GN=spata18 PE=2 SV=2	pss:102463303/6e-06/COLEC12; collectin sub-family member 12; K10062 collectin sub-family member 12	NA	PTHR21771/5.5E-161/--	biological_process:GO:0035695//mitochondrion degradation by induced vacuole formation;GO:0035694//mitochondrial protein catabolic process;cellular_component:GO:0005741//mitochondrial outer membrane;
Unigene32877_All	615	0.17	12.6	6.21175	3.00612e-21	5.0178e-20	Up	NA	NA	NA	NA	NA	NA	NA
CL2714.Contig4_All	2551	0.01	0.74	6.20945	2.1185e-06	1.37276e-05	Up	gi|405956994|gb|EKC23233.1|/2.31122e-166/IQ domain-containing protein E [Crassostrea gigas]	NA	sp|Q6IPM2|IQCE_HUMAN/1e-45/IQ domain-containing protein E OS=Homo sapiens GN=IQCE PE=1 SV=2	tup:102470034/2e-15/golgin subfamily A member 4-like; K10352 myosin heavy chain	aq_1006/3e-10/---	PS50096/7.895/IQ motif profile.	NA
CL526.Contig3_All	2044	0.01	0.74	6.20945	3.31916e-05	0.000182256	Up	NA	NA	NA	NA	NA	NA	NA
Unigene36003_All	1634	0.18	13.25	6.20185	8.56892e-61	4.02472e-59	Up	NA	NA	NA	NA	NA	NA	NA
Unigene33259_All	694	0.15	10.91	6.18454	5.90308e-21	9.74816e-20	Up	gi|405975599|gb|EKC40153.1|/6.84163e-19/Pancreatic secretory granule membrane major glycoprotein GP2 [Crassostrea gigas]	NA	sp|Q29RU2|OIT3_BOVIN/4e-08/Oncoprotein-induced transcript 3 protein OS=Bos taurus GN=OIT3 PE=2 SV=1	lcm:102351451/9e-09/uromodulin-like; K18274 uromodulin	NA	PTHR22962:SF57/1.5E-24/--	NA
CL364.Contig10_All	3833	0.01	0.72	6.16993	4.3379e-09	3.64207e-08	Up	gi|405975833|gb|EKC40375.1|/5.28788e-64/Doublecortin domain-containing protein 2 [Crassostrea gigas]	NA	sp|D3ZR10|DCDC2_RAT/1e-23/Doublecortin domain-containing protein 2 OS=Rattus norvegicus GN=Dcdc2 PE=4 SV=1	lcm:102352066/1e-24/MYO3A; myosin IIIA; K08834 myosin III [EC:2.7.11.1]	NA	PS50096/10.054/IQ motif profile.	NA
CL3986.Contig3_All	2380	0.01	0.72	6.16993	8.3855e-06	5.00854e-05	Up	gi|405978351|gb|EKC42751.1|/4.29072e-58/Spermatogenesis-associated protein 1 [Crassostrea gigas]	NA	sp|Q5T200|ZC3HD_HUMAN/2e-19/Zinc finger CCCH domain-containing protein 13 OS=Homo sapiens GN=ZC3H13 PE=1 SV=1	aga:AgaP_AGAP003276/2e-19/AGAP003276-PA; K13169 splicing factor, arginine/serine-rich 17	mlr5554/5e-10/---	PTHR14421/5.3E-65/--	NA
CL4832.Contig1_All	5756	0.01	0.71	6.14975	2.84956e-13	3.18302e-12	Up	gi|405950979|gb|EKC18930.1|/3.0203e-58/Macrophage colony-stimulating factor 1 receptor 2 [Crassostrea gigas]	NA	sp|P42689|SRK3_SPOLA/4e-20/Tyrosine-protein kinase SRK3 (Fragment) OS=Spongilla lacustris GN=SRK3 PE=2 SV=1	crg:105341914/1e-18/tyrosine-protein kinase Yes-like; K05705 tyrosine-protein kinase Yes [EC:2.7.10.2]	L138452_1/2e-09/---	PS50011/26.605/Protein kinase domain profile.	NA
CL1934.Contig2_All	4758	0.01	0.7	6.12928	6.99486e-11	6.72908e-10	Up	gi|405954851|gb|EKC22176.1|/0/Intermediate filament tail domain-containing protein 1 [Crassostrea gigas]	gi|390350049|ref|XM_790982.3|/5e-07/PREDICTED: Strongylocentrotus purpuratus prelamin-A/C-like (LOC591420), mRNA	sp|Q9D4C1|ILFT1_MOUSE/2e-46/Intermediate filament tail domain-containing protein 1 OS=Mus musculus GN=Ifltd1 PE=2 SV=1	hmg:100209215/3e-33/lamin; prelamin-A/C-like; K07611 lamin B	aq_629/3e-09/---	PF00932/2.0E-13/Lamin Tail Domain	NA
CL3770.Contig1_All	4791	0.01	0.69	6.10852	1.39165e-10	1.30789e-09	Up	gi|524911177|ref|XP_005110456.1|/0/PREDICTED: cyclin-G-associated kinase-like [Aplysia californica]	gi|524911176|ref|XM_005110399.1|/6e-13/PREDICTED: Aplysia californica cyclin-G-associated kinase-like (LOC101858745), mRNA	sp|P97874|GAK_RAT/0.0/Cyclin-G-associated kinase OS=Rattus norvegicus GN=Gak PE=2 SV=1	crg:105328569/0.0/cyclin-G-associated kinase-like; K08855 cyclin G-associated kinase [EC:2.7.11.1]	YBR059c/3e-34/---	PS50076/9.692/dnaJ domain profile.	NA
CL2236.Contig2_All	4277	0.03	2.03	6.08037	1.18588e-25	2.35258e-24	Up	gi|405960594|gb|EKC26506.1|/2.56116e-99/hypothetical protein CGI_10002601 [Crassostrea gigas]	NA	sp|Q12830|BPTF_HUMAN/3e-10/Nucleosome-remodeling factor subunit BPTF OS=Homo sapiens GN=BPTF PE=1 SV=3	crg:105327069/5e-146/uncharacterized LOC105327069; K03424 TatD DNase family protein [EC:3.1.21.-]	lin0224/5e-16/---	PTHR10060:SF0/4.4E-57/--	NA
CL3258.Contig3_All	1377	0.07	4.7	6.06916	1.29653e-18	1.92446e-17	Up	NA	NA	NA	NA	NA	NA	NA
Unigene41830_All	4670	0.08	4.78	5.90087	7.68494e-63	3.72859e-61	Up	gi|405969768|gb|EKC34721.1|/5.46147e-127/Blastula protease 10 [Crassostrea gigas]	gi|119416885|emb|CT033759.32|/2e-06/Mouse DNA sequence from clone RP24-392I1 on chromosome 17, complete sequence	sp|P98060|NAS35_CAEEL/1e-39/Zinc metalloproteinase dpy-31 OS=Caenorhabditis elegans GN=dpy-31 PE=1 SV=2	crg:105328831/4e-97/uncharacterized LOC105328831; K01315 plasminogen [EC:3.4.21.7]; K05719 integrin beta 1; K06464 integrin beta 2; K06493 integrin beta 3	NA	PS50060/22.976/MAM domain profile.	NA
CL3774.Contig1_All	5950	0.46	27.42	5.89745	0	0	Up	gi|260818210|ref|XP_002604276.1|/9.8886e-121/hypothetical protein BRAFLDRAFT_88565 [Branchiostoma floridae] &gt;gi|229289602|gb|EEN60287.1| hypothetical protein BRAFLDRAFT_88565 [Branchiostoma floridae]	NA	sp|O75339|CILP1_HUMAN/5e-102/Cartilage intermediate layer protein 1 OS=Homo sapiens GN=CILP PE=1 SV=4	oaa:100092988/4e-25/THBS1; thrombospondin 1; K05719 integrin beta 1; K16857 thrombospondin 1	NA	PF00090/1.1E-8/Thrombospondin type 1 domain	NA
Unigene35758_All	1570	0.13	7.5	5.85031	5.24506e-33	1.31362e-31	Up	gi|405969957|gb|EKC34900.1|/9.15078e-40/Serine-enriched protein [Crassostrea gigas]	NA	sp|O61366|GPRS_DROME/2e-21/Serine-enriched protein OS=Drosophila melanogaster GN=gprs PE=4 SV=3	xma:102223332/4e-07/kelch-like protein 3-like; K10443 kelch-like protein 2/3	NA	PTHR24410:SF3/7.8E-32/--	NA
Unigene31805_All	2165	0.41	23.55	5.84396	2.46308e-141	2.86763e-139	Up	NA	NA	NA	NA	NA	NA	NA
CL2852.Contig2_All	2824	0.01	0.57	5.83289	1.66832e-05	9.55943e-05	Up	gi|405968524|gb|EKC33588.1|/0/hypothetical protein CGI_10017740 [Crassostrea gigas]	NA	NA	NA	NA	PTHR13826/2.9E-39/--	NA
CL1635.Contig2_All	814	0.22	12.52	5.83059	1.35316e-28	2.974e-27	Up	NA	NA	NA	NA	NA	NA	NA
Unigene44205_All	1122	0.09	4.74	5.71882	4.10654e-15	5.11794e-14	Up	gi|405970652|gb|EKC35540.1|/2.91843e-09/hypothetical protein CGI_10005164 [Crassostrea gigas]	NA	NA	NA	NA	NA	NA
Unigene31413_All	2681	0.12	6.21	5.69349	1.77197e-46	6.18069e-45	Up	gi|524881268|ref|XP_005097288.1|/1.00234e-34/PREDICTED: galectin-3-like isoform X2 [Aplysia californica]	NA	sp|P24639|ANXA7_DICDI/4e-21/Annexin A7 OS=Dictyostelium discoideum GN=nxnA PE=1 SV=1	crg:105348537/1e-47/annexin A7-like; K17095 annexin A7/11	Cgl1939/7e-08/---	NA	NA
Unigene44594_All	1918	0.12	6.2	5.69116	1.36872e-33	3.47996e-32	Up	NA	NA	NA	NA	NA	NA	NA
Unigene45250_All	1128	0.09	4.63	5.68494	8.02422e-15	9.85992e-14	Up	gi|556116503|gb|ESP05155.1|/3.86258e-12/hypothetical protein LOTGIDRAFT_151956 [Lottia gigantea]	NA	NA	NA	NA	NA	NA
CL1872.Contig3_All	352	0.32	16.3	5.67066	1.56742e-14	1.88867e-13	Up	NA	NA	NA	NA	NA	NA	NA
Unigene42435_All	668	0.16	8.09	5.66	8.02422e-15	9.85791e-14	Up	NA	NA	NA	NA	NA	NA	NA
CL2340.Contig1_All	2889	0.17	8.57	5.65569	3.89644e-68	2.06129e-66	Up	gi|405958063|gb|EKC24227.1|/0/Putative pre-mRNA-splicing factor ATP-dependent RNA helicase DHX15 [Crassostrea gigas]	gi|558228622|ref|XM_006138162.1|/3e-66/PREDICTED: Pelodiscus sinensis DEAH (Asp-Glu-Ala-His) box helicase 15 (DHX15), mRNA	sp|A2A4P0|DHX8_MOUSE/0.0/ATP-dependent RNA helicase DHX8 OS=Mus musculus GN=Dhx8 PE=2 SV=1	dre:321931/0.0/dhx15, im:2639158, wu:fb38f09, wu:fk62f05; DEAH (Asp-Glu-Ala-His) box helicase 15 (EC:3.6.1.-); K12820 pre-mRNA-splicing factor ATP-dependent RNA helicase DHX15/PRP43 [EC:3.6.4.13]	YGL120c/0.0/---	PS51194/16.858/Superfamilies 1 and 2 helicase C-terminal domain profile.	NA
Unigene32756_All	2252	0.09	4.52	5.65025	1.22341e-28	2.69471e-27	Up	gi|405974973|gb|EKC39576.1|/3.0239e-13/hypothetical protein CGI_10017215 [Crassostrea gigas]	gi|640807757|ref|XM_008062193.1|/4e-06/PREDICTED: Tarsius syrichta autism susceptibility candidate 2 (AUTS2), mRNA	NA	NA	NA	NA	NA
Unigene35081_All	753	0.14	6.97	5.63766	1.56742e-14	1.88905e-13	Up	gi|405957498|gb|EKC23703.1|/2.80573e-11/hypothetical protein CGI_10016679 [Crassostrea gigas]	NA	NA	NA	NA	NA	NA
CL68.Contig1_All	2328	0.1	4.91	5.61765	3.93068e-32	9.58946e-31	Up	NA	NA	NA	NA	NA	NA	NA
CL3894.Contig3_All	1439	12.4	602.62	5.60284	0	0	Up	NA	NA	NA	NA	NA	NA	NA
Unigene41222_All	2273	0.22	10.68	5.60126	2.1492e-66	1.10498e-64	Up	gi|405964240|gb|EKC29746.1|/1.51028e-129/hypothetical protein CGI_10009342 [Crassostrea gigas]	NA	NA	NA	NA	NA	NA
Unigene32680_All	282	0.42	20	5.57347	1.16578e-13	1.33611e-12	Up	NA	NA	NA	mmu:332131/8e-06/Krt78, 2310030B04Rik, Kb40; keratin 78; K07605 type II keratin, basic	NA	NA	NA
CL805.Contig8_All	3551	0.01	0.47	5.55459	8.3855e-06	5.0021e-05	Up	gi|405965222|gb|EKC30619.1|/0/Centrosome and spindle pole-associated protein 1 [Crassostrea gigas]	NA	sp|Q1MSJ5|CSPP1_HUMAN/1e-81/Centrosome and spindle pole-associated protein 1 OS=Homo sapiens GN=CSPP1 PE=1 SV=4	crg:105330303/0.0/trichohyalin-like; K16771 centrosome and spindle pole-associated protein 1	NMA0905/1e-09/---	PTHR21616/2.1E-97/--	NA
Unigene41896_All	2892	0.13	6.07	5.54511	2.1565e-49	8.12331e-48	Up	gi|556116798|gb|ESP05450.1|/8.99349e-13/hypothetical protein LOTGIDRAFT_181288 [Lottia gigantea]	NA	sp|Q5Q0U5|SGK1_FUNHE/2e-12/Serine/threonine-protein kinase Sgk1 OS=Fundulus heteroclitus GN=sgk1 PE=2 SV=1	crg:105331539/3e-13/serine/threonine-protein kinase Sgk1-like; K13304 serum/glucocorticoid-regulated kinase 3 [EC:2.7.11.1]	NA	PTHR24356:SF102/7.7E-14/--	biological_process:GO:0009987//cellular process;cellular_component:GO:0044424//intracellular part;molecular_function:GO:0016301//kinase activity;
Unigene31698_All	974	0.38	17.51	5.52604	6.77482e-46	2.33205e-44	Up	NA	gi|193734852|gb|EU623933.1|/2e-06/Argopecten irradians clone HWDD051 microsatellite sequence	NA	NA	NA	NA	NA
Unigene36583_All	799	0.13	5.9	5.50413	4.4335e-13	4.8943e-12	Up	gi|405952726|gb|EKC20504.1|/8.47111e-33/Cartilage matrix protein, partial [Crassostrea gigas]	NA	sp|Q99715|COCA1_HUMAN/2e-20/Collagen alpha-1(XII) chain OS=Homo sapiens GN=COL12A1 PE=1 SV=2	crg:105329078/2e-24/uncharacterized LOC105329078; K05719 integrin beta 1; K06238 collagen, type VI, alpha	NA	SM00327/2.0E-32/von Willebrand factor (vWF) type A domain	NA
CL950.Contig2_All	3150	0.01	0.44	5.45943	6.60358e-05	0.000346123	Up	gi|405964911|gb|EKC30350.1|/0/Uncharacterized protein C18orf34 [Crassostrea gigas]	NA	sp|Q5BJE1|CC178_HUMAN/2e-48/Coiled-coil domain-containing protein 178 OS=Homo sapiens GN=CCDC178 PE=2 SV=3	lcm:102349586/4e-27/MYH11; myosin, heavy chain 11, smooth muscle; K10352 myosin heavy chain	PH0929/9e-16/---	NA	NA
CL3710.Contig3_All	1389	0.34	14.92	5.45557	3.78782e-56	1.6282e-54	Up	gi|115390|sp|P14533.1|CABO_LOLPE/2.42052e-17/RecName: Full=Squidulin; AltName: Full=Optic lobe calcium-binding protein; AltName: Full=SCABP &gt;gi|102715|pir||A33353 calcium-binding protein - squid (Watasenia scintillans)	NA	sp|P14533|CABO_DORPE/4e-19/Squidulin OS=Doryteuthis pealeii PE=1 SV=1	cbr:CBG01097/2e-17/Cbr-cmd-1; C. briggsae CBR-CMD-1 protein; K02183 calmodulin	SPAC3A12.14/8e-16/---	PS50222/7.288/EF-hand calcium-binding domain profile.	NA
CL618.Contig5_All	2199	0.11	4.74	5.42931	3.20686e-29	7.18957e-28	Up	gi|578821001|ref|XP_006718462.1|/1.40947e-15/PREDICTED: mucin-5AC [Homo sapiens]	NA	sp|P98088|MUC5A_HUMAN/5e-16/Mucin-5AC (Fragments) OS=Homo sapiens GN=MUC5AC PE=1 SV=3	asn:102388355/8e-14/mucin-2-like; K10955 intestinal mucin-2	NA	NA	NA
CL4614.Contig2_All	1107	2.73	117.09	5.42257	0	0	Up	gi|291244887|ref|XP_002742334.1|/1.32381e-33/PREDICTED: histone H1-like [Saccoglossus kowalevskii]	gi|41176421|gb|AY512574.1|/0.0/Argopecten irradians microsatellite ScaE_4269 sequence	sp|P06144|H1_LYTPI/1e-34/Late histone H1 OS=Lytechinus pictus PE=3 SV=1	crg:105320407/9e-33/histone H1-delta-like; K11275 histone H1/5	CC3441/9e-12/---	NA	NA
Unigene32982_All	481	0.23	9.61	5.38483	3.27766e-12	3.42997e-11	Up	gi|556095543|gb|ESO84196.1|/1.42279e-06/hypothetical protein LOTGIDRAFT_87564, partial [Lottia gigantea]	NA	NA	NA	NA	NA	NA
CL775.Contig3_All	658	0.9	37.26	5.37156	1.26328e-62	6.10464e-61	Up	NA	NA	NA	NA	NA	NA	NA
Unigene37717_All	1162	0.09	3.71	5.36535	3.27766e-12	3.43056e-11	Up	gi|557013717|ref|XP_006007392.1|/5.86115e-11/PREDICTED: dentin sialophosphoprotein-like [Latimeria chalumnae]	NA	sp|Q9U7E0|ATRX_CAEEL/2e-10/Transcriptional regulator ATRX homolog OS=Caenorhabditis elegans GN=xnp-1 PE=1 SV=1	pxy:105395066/5e-10/serine/arginine repetitive matrix protein 1; K13171 serine/arginine repetitive matrix protein 1	NA	NA	NA
Unigene43771_All	770	0.13	5.34	5.36026	2.41286e-11	2.39807e-10	Up	gi|405961048|gb|EKC26908.1|/6.50253e-19/Tripartite motif-containing protein 3 [Crassostrea gigas]	NA	sp|Q64127|TIF1A_MOUSE/4e-14/Transcription intermediary factor 1-alpha OS=Mus musculus GN=Trim24 PE=1 SV=1	crg:105319164/2e-18/tripartite motif-containing protein 3-like; K11997 tripartite motif-containing protein 2/3	NA	PS50119/9.997/Zinc finger B-box type profile.	NA
Unigene14367_All	942	18.25	747.61	5.35632	0	0	Up	NA	NA	NA	NA	NA	NA	NA
CL801.Contig3_All	2048	0.06	2.45	5.35168	1.56742e-14	1.88942e-13	Up	gi|556096104|gb|ESO84756.1|/4.68312e-50/hypothetical protein LOTGIDRAFT_236111 [Lottia gigantea]	NA	sp|Q6DDY9|RT07_XENLA/2e-32/28S ribosomal protein S7, mitochondrial OS=Xenopus laevis GN=mrps7 PE=2 SV=1	cfo:105249098/1e-35/28S ribosomal protein S7, mitochondrial; K02992 small subunit ribosomal protein S7	RC0173/8e-17/---	PS50222/8.516/EF-hand calcium-binding domain profile.	NA
Unigene39188_All	835	0.12	4.89	5.34873	2.41286e-11	2.39846e-10	Up	gi|452755177|gb|AGG10810.1|/1.71972e-55/toll-like receptor m [Mytilus galloprovincialis]	NA	sp|Q6R5N8|TLR13_MOUSE/5e-23/Toll-like receptor 13 OS=Mus musculus GN=Tlr13 PE=1 SV=1	crg:105330702/2e-42/toll-like receptor 2; K18808 toll-like receptor 13	NA	PTHR24365/6.8E-56/--	NA
Unigene31435_All	2235	0.18	7.26	5.3339	1.07637e-43	3.54525e-42	Up	NA	gi|270063467|gb|GU207460.1|/4e-06/Crassostrea gigas clone CG_Ba96P24, complete sequence	NA	NA	NA	NA	NA
CL2470.Contig3_All	1081	0.13	5.22	5.32747	5.49396e-16	7.16234e-15	Up	gi|514699645|ref|XP_004997391.1|/2.46797e-16/hypothetical protein PTSG_11726 [Salpingoeca rosetta] &gt;gi|326435260|gb|EGD80830.1| hypothetical protein PTSG_11726 [Salpingoeca rosetta]	NA	sp|Q05049|MUC1_XENLA/7e-11/Integumentary mucin C.1 (Fragment) OS=Xenopus laevis PE=2 SV=1	crg:105332622/9e-11/chit3; probable chitinase 3; K01183 chitinase [EC:3.2.1.14]	YKR013w/9e-06/---	NA	NA
CL702.Contig1_All	1030	0.14	5.59	5.31935	2.80824e-16	3.72956e-15	Up	gi|260793202|ref|XP_002591601.1|/5.10793e-69/hypothetical protein BRAFLDRAFT_281070 [Branchiostoma floridae] &gt;gi|229276810|gb|EEN47612.1| hypothetical protein BRAFLDRAFT_281070 [Branchiostoma floridae]	gi|88900527|gb|AC171135.2|/5e-13/Helobdella robusta clone CH306-1A6, complete sequence	sp|Q9Y2Q3|GSTK1_HUMAN/6e-52/Glutathione S-transferase kappa 1 OS=Homo sapiens GN=GSTK1 PE=1 SV=3	crg:105325336/2e-69/glutathione S-transferase kappa 1-like; K13299 glutathione S-transferase kappa 1 [EC:2.5.1.18]	PA0118/5e-14/---	PTHR13887/7.1E-60/--	NA
Unigene33957_All	1060	0.1	3.99	5.31832	6.37928e-12	6.55738e-11	Up	gi|405965742|gb|EKC31096.1|/3.80361e-83/hypothetical protein CGI_10028721 [Crassostrea gigas]	NA	NA	bfo:BRAFLDRAFT_87609/1e-15/hypothetical protein; K00654 serine palmitoyltransferase [EC:2.3.1.50]	NA	PS50157/9.785/Zinc finger C2H2 type domain profile.	NA
Unigene40065_All	1666	0.18	7.17	5.3159	2.86016e-32	7.00327e-31	Up	gi|405964262|gb|EKC29765.1|/6.0273e-13/hypothetical protein CGI_10015342 [Crassostrea gigas]	NA	NA	NA	NA	PF01129/1.8E-7/NAD:arginine ADP-ribosyltransferase	NA
Unigene46875_All	1200	0.08	3.17	5.30834	9.10652e-11	8.67745e-10	Up	gi|528524052|ref|XP_005174674.1|/1.89722e-12/PREDICTED: mucin-2-like [Danio rerio]	NA	sp|P07359|GP1BA_HUMAN/6e-09/Platelet glycoprotein Ib alpha chain OS=Homo sapiens GN=GP1BA PE=1 SV=2	cjc:100393767/2e-10/GP1BA; glycoprotein Ib (platelet), alpha polypeptide; K06261 platelet glycoprotein Ib alpha chain	Rv3876/2e-07/---	NA	NA
Unigene14128_All	801	0.13	5.12	5.29956	2.41286e-11	2.39767e-10	Up	NA	NA	NA	NA	NA	NA	NA
CL1934.Contig1_All	3451	0.07	2.75	5.29593	1.31933e-26	2.72207e-25	Up	gi|405954851|gb|EKC22176.1|/0/Intermediate filament tail domain-containing protein 1 [Crassostrea gigas]	gi|390350049|ref|XM_790982.3|/4e-07/PREDICTED: Strongylocentrotus purpuratus prelamin-A/C-like (LOC591420), mRNA	sp|Q9D4C1|ILFT1_MOUSE/1e-46/Intermediate filament tail domain-containing protein 1 OS=Mus musculus GN=Ifltd1 PE=2 SV=1	tgu:100232006/3e-35/LMNB2; lamin B2; K07611 lamin B	aq_629/2e-09/---	PF00038/7.6E-24/Intermediate filament protein	NA
CL479.Contig2_All	466	0.29	11.35	5.2905	5.97444e-14	6.94768e-13	Up	NA	NA	NA	NA	NA	NA	NA
Unigene14996_All	12222	0.01	0.39	5.2854	2.30956e-15	2.91574e-14	Up	gi|405972713|gb|EKC37466.1|/0/von Willebrand factor D and EGF domain-containing protein [Crassostrea gigas]	NA	sp|Q8N2E2|VWDE_HUMAN/9e-22/von Willebrand factor D and EGF domain-containing protein OS=Homo sapiens GN=VWDE PE=2 SV=4	crg:105322503/0.0/uncharacterized LOC105322503; K12855 pre-mRNA-processing factor 6	Rv0312/9e-08/---	PTHR11339/1.0E-13/--	NA
Unigene41591_All	4875	0.16	6.17	5.26913	1.18344e-80	7.48909e-79	Up	gi|405971708|gb|EKC36531.1|/0/Xanthine dehydrogenase/oxidase [Crassostrea gigas]	gi|556736608|ref|XM_005963839.1|/1e-10/PREDICTED: Pantholops hodgsonii xanthine dehydrogenase (XDH), transcript variant X2, mRNA	sp|P47990|XDH_CHICK/0.0/Xanthine dehydrogenase/oxidase OS=Gallus gallus GN=XDH PE=1 SV=1	crg:105320852/0.0/xanthine dehydrogenase/oxidase-like; K00106 xanthine dehydrogenase/oxidase [EC:1.17.1.4 1.17.3.2]	PA1523/3e-176/---	PF00941/1.8E-56/FAD binding domain in molybdopterin dehydrogenase	biological_process:GO:0051093//negative regulation of developmental process;GO:0032270//positive regulation of cellular protein metabolic process;GO:1902531//regulation of intracellular signal transduction;GO:0009968//negative regulation of signal transduction;GO:0001932//regulation of protein phosphorylation;GO:0034418//urate biosynthetic process;GO:0010605//negative regulation of macromolecule …
Unigene39515_All	1136	0.09	3.44	5.25634	4.68884e-11	4.57416e-10	Up	gi|405959277|gb|EKC25330.1|/8.77038e-105/IgGFc-binding protein [Crassostrea gigas]	NA	sp|Q9Y493|ZAN_HUMAN/8e-47/Zonadhesin OS=Homo sapiens GN=ZAN PE=2 SV=4	ola:101172773/4e-47/alpha-tectorin-like; K18273 alpha-tectorin	NA	SM00832/9.2E-8/--	NA
CL4422.Contig1_All	716	0.29	10.82	5.2215	3.0084e-20	4.82015e-19	Up	gi|405978323|gb|EKC42724.1|/2.50774e-35/GTPase IMAP family member 7 [Crassostrea gigas]	NA	sp|Q8NHV1|GIMA7_HUMAN/9e-31/GTPase IMAP family member 7 OS=Homo sapiens GN=GIMAP7 PE=1 SV=1	NA	NA	PF04548/1.1E-47/AIG1 family	NA
CL1565.Contig2_All	611	0.17	6.34	5.22088	1.76759e-10	1.65041e-09	Up	NA	NA	NA	NA	NA	NA	NA
Unigene32347_All	3305	0.33	12.17	5.20472	1.82292e-106	1.54406e-104	Up	gi|405959406|gb|EKC25451.1|/3.69073e-42/hypothetical protein CGI_10023074 [Crassostrea gigas]	NA	NA	NA	NA	NA	NA
Unigene32123_All	727	0.57	21.01	5.20397	8.45588e-39	2.47432e-37	Up	gi|343472143|emb|CCD15626.1|/6.81943e-20/unnamed protein product [Trypanosoma congolense IL3000]	NA	sp|P05227|HRP1_PLAFA/4e-07/Histidine-rich protein PFHRP-II OS=Plasmodium falciparum PE=2 SV=1	ola:101167013/1e-14/A disintegrin and metalloproteinase with thrombospondin motifs 3-like; K08619 a disintegrin and metalloproteinase with thrombospondin motifs 3 [EC:3.4.24.-]	NA	NA	NA
Unigene47825_All	906	0.11	4.04	5.19878	3.42878e-10	3.12219e-09	Up	NA	NA	NA	NA	NA	NA	NA
Unigene44932_All	1429	0.07	2.57	5.19827	1.76759e-10	1.6499e-09	Up	gi|405950219|gb|EKC18219.1|/9.92687e-06/Tripartite motif-containing protein 2 [Crassostrea gigas]	NA	NA	NA	NA	NA	NA
CL27.Contig2_All	1901	0.14	5.02	5.16419	2.57288e-26	5.23853e-25	Up	NA	NA	NA	NA	NA	NA	NA
CL3819.Contig1_All	1897	0.71	25.28	5.15403	6.53212e-125	6.55473e-123	Up	gi|564260138|ref|XP_006268985.1|/1.57879e-20/PREDICTED: transcobalamin-2 [Alligator mississippiensis]	NA	sp|P27352|IF_HUMAN/4e-16/Gastric intrinsic factor OS=Homo sapiens GN=GIF PE=1 SV=2	crg:105331555/1e-26/gastric intrinsic factor-like; K14615 gastric intrinsic factor	NA	PF01122/2.3E-14/Eukaryotic cobalamin-binding protein	NA
CL290.Contig3_All	945	0.22	7.79	5.14605	2.19156e-19	3.37854e-18	Up	NA	NA	NA	NA	NA	NA	NA
CL5261.Contig1_All	642	0.17	6.01	5.14376	1.76759e-10	1.65015e-09	Up	NA	NA	NA	NA	NA	NA	NA
Unigene46688_All	969	0.11	3.86	5.13303	1.76759e-10	1.64964e-09	Up	gi|443710373|gb|ELU04626.1|/1.54975e-40/hypothetical protein CAPTEDRAFT_173573 [Capitella teleta]	NA	sp|B1AUH1|PTPRU_MOUSE/3e-29/Receptor-type tyrosine-protein phosphatase U OS=Mus musculus GN=Ptpru PE=1 SV=1	crg:105332378/3e-38/receptor-type tyrosine-protein phosphatase kappa-like; K06776 receptor-type tyrosine-protein phosphatase kappa [EC:3.1.3.48]	NA	PF00102/4.0E-38/Protein-tyrosine phosphatase	NA
CL4640.Contig2_All	2611	0.11	3.85	5.12928	4.27942e-27	8.99872e-26	Up	gi|405953812|gb|EKC21401.1|/3.28501e-91/Sushi, von Willebrand factor type A, EGF and pentraxin domain-containing protein 1 [Crassostrea gigas]	NA	sp|P0C6B8|SVEP1_RAT/4e-41/Sushi, von Willebrand factor type A, EGF and pentraxin domain-containing protein 1 OS=Rattus norvegicus GN=Svep1 PE=1 SV=1	crg:105335342/5e-81/uncharacterized LOC105335342; K17495 CUB and sushi domain-containing protein	NA	PS50923/8.582/Sushi/CCP/SCR domain profile.	NA
Unigene40295_All	768	0.27	9.37	5.11702	8.22142e-19	1.22971e-17	Up	NA	NA	NA	NA	NA	NA	NA
Unigene42363_All	729	0.14	4.81	5.10254	1.2876e-09	1.12769e-08	Up	gi|405975250|gb|EKC39831.1|/9.53724e-46/hypothetical protein CGI_10025387 [Crassostrea gigas]	NA	NA	NA	CAC0567/2e-12/---	PTHR10108:SF777/4.3E-24/--	NA
Unigene39114_All	418	0.26	8.91	5.09884	1.2876e-09	1.12802e-08	Up	NA	NA	NA	NA	NA	NA	NA
CL1220.Contig2_All	670	0.18	6.13	5.08982	4.68884e-11	4.57342e-10	Up	gi|123421559|ref|XP_001306009.1|/5.59447e-07/erythrocyte binding protein [Trichomonas vaginalis G3]	NA	NA	crg:105345699/1e-06/chromodomain-helicase-DNA-binding protein Mi-2 homolog; K11643 chromodomain-helicase-DNA-binding protein 4 [EC:3.6.4.12]	NA	NA	NA
CL109.Contig1_All	1725	0.08	2.72	5.08746	2.27388e-13	2.56084e-12	Up	gi|405966527|gb|EKC31802.1|/1.94646e-46/Serine/threonine-protein kinase Nek4 [Crassostrea gigas]	NA	sp|Q54QQ2|Y5634_DICDI/1e-06/Uncharacterized protein DDB_G0283697 OS=Dictyostelium discoideum GN=DDB_G0283697 PE=4 SV=1	crg:105343212/1e-41/uncharacterized LOC105343212; K09935 uncharacterized protein	PA4580/1e-30/---	PTHR11079:SF38/7.0E-41/--	NA
Unigene32465_All	603	0.18	6.09	5.08037	6.64678e-10	5.94474e-09	Up	NA	NA	NA	NA	NA	NA	NA
Unigene43943_All	524	0.2	6.7	5.06609	2.4925e-09	2.1361e-08	Up	NA	NA	NA	NA	NA	NA	NA
Unigene32586_All	494	0.22	7.37	5.06609	1.2876e-09	1.12835e-08	Up	gi|405962322|gb|EKC28012.1|/6.80312e-63/Histone H2A [Crassostrea gigas] &gt;gi|405962327|gb|EKC28017.1| Histone H2A [Crassostrea gigas] &gt;gi|405962329|gb|EKC28019.1| Histone H2A [Crassostrea gigas] &gt;gi|405962333|gb|EKC28023.1| Histone H2A [Crassostrea gigas] &gt;gi|405962338|gb|EKC28028.1| Histone H2A [Crassostrea gigas] &gt;gi|405962343|gb|EKC28033.1| Histone H2A [Crassostrea gigas] &gt;gi|…	gi|89520690|gb|DQ418455.1|/1e-149/Chlamys farreri core histone gene cluster, complete sequence	sp|P84057|H2A_TIGCA/7e-62/Histone H2A OS=Tigriopus californicus GN=His2A PE=3 SV=2	crg:105320439/3e-64/uncharacterized LOC105320439; K11254 histone H4	SPAC19G12.06c/1e-49/---	PR00620/8.79E-56/Histone H2A signature	cellular_component:GO:0005634//nucleus;GO:0000786//nucleosome;molecular_function:GO:0003677//DNA binding;GO:0046982//protein heterodimerization activity;
CL1994.Contig2_All	1935	0.1	3.35	5.06609	2.22604e-17	3.10975e-16	Up	gi|405962584|gb|EKC28247.1|/1.94955e-74/Tenascin-X [Crassostrea gigas]	NA	sp|Q5ND28|SREC_MOUSE/1e-42/Scavenger receptor class F member 1 OS=Mus musculus GN=Scarf1 PE=1 SV=1	crg:105333895/1e-62/uncharacterized LOC105333895; K18032 receptor-type tyrosine-protein phosphatase A [EC:3.1.3.48]	NA	PTHR24035:SF4/1.6E-19/--	NA
CL397.Contig10_All	2039	0.14	4.67	5.05992	2.57288e-26	5.2403e-25	Up	NA	gi|365176255|gb|JN674556.1|/4e-12/Argopecten purpuratus microsatellite Apur5 sequence	NA	NA	NA	NA	NA
Unigene40679_All	688	0.15	4.97	5.05021	2.4925e-09	2.1358e-08	Up	NA	NA	NA	NA	NA	NA	NA
Unigene31586_All	809	0.13	4.3	5.04775	1.2876e-09	1.12786e-08	Up	NA	NA	NA	NA	NA	NA	NA
CL3406.Contig2_All	1477	0.61	20.11	5.04296	3.3443e-77	2.0189e-75	Up	NA	gi|348020199|gb|JN703458.1|/2e-06/Chlamys farreri clone BAC Bam123C08, complete sequence	NA	NA	NA	NA	NA
Unigene34214_All	294	0.4	13.07	5.03012	2.4925e-09	2.1355e-08	Up	NA	NA	NA	NA	NA	NA	NA
Unigene39166_All	1127	0.09	2.94	5.02975	2.4925e-09	2.13641e-08	Up	NA	NA	NA	NA	NA	NA	NA
Unigene31974_All	3391	0.35	11.37	5.02173	4.57508e-100	3.54645e-98	Up	gi|405971268|gb|EKC36114.1|/7.73453e-11/Serine/threonine-protein kinase Sgk3 [Crassostrea gigas]	NA	NA	crg:105331539/2e-11/serine/threonine-protein kinase Sgk1-like; K13304 serum/glucocorticoid-regulated kinase 3 [EC:2.7.11.1]	NA	NA	NA
CL3731.Contig1_All	1367	0.38	12.19	5.00355	4.93444e-43	1.60684e-41	Up	gi|585669396|ref|XP_006888729.1|/4.71582e-58/PREDICTED: thiopurine S-methyltransferase [Elephantulus edwardii]	NA	sp|Q3BCR0|TPMT_PANLE/2e-59/Thiopurine S-methyltransferase OS=Panthera leo GN=TPMT PE=2 SV=1	bom:102267418/8e-58/TPMT; thiopurine S-methyltransferase; K00569 thiopurine S-methyltransferase [EC:2.1.1.67]	VC1226/2e-23/---	PF05724/3.2E-66/Thiopurine S-methyltransferase (TPMT)	molecular_function:GO:0008168//methyltransferase activity;
CL4491.Contig1_All	480	0.41	13.09	4.9967	1.43503e-16	1.93006e-15	Up	NA	NA	NA	NA	NA	NA	NA
Unigene40178_All	1028	0.2	6.38	4.99548	2.22604e-17	3.11047e-16	Up	gi|556104389|gb|ESO93041.1|/3.60074e-107/hypothetical protein LOTGIDRAFT_216279 [Lottia gigantea]	NA	sp|Q6GLT8|FAHD2_XENLA/1e-98/Fumarylacetoacetate hydrolase domain-containing protein 2 OS=Xenopus laevis GN=fahd2 PE=2 SV=1	cin:100175822/6e-35/acylpyruvase FAHD1, mitochondrial-like; K01557 acylpyruvate hydrolase [EC:3.7.1.5]	BH2000/1e-58/---	PF01557/1.2E-63/Fumarylacetoacetate (FAA) hydrolase family	NA
Unigene46883_All	910	0.11	3.46	4.9752	9.31796e-09	7.60828e-08	Up	NA	NA	NA	NA	NA	NA	NA
Unigene33258_All	852	0.24	7.54	4.97346	8.30444e-17	1.12747e-15	Up	gi|632966470|ref|XP_007899433.1|/4.14003e-12/PREDICTED: mucin-2-like [Callorhinchus milii]	gi|198473209|ref|XM_002133175.1|/4e-07/Drosophila pseudoobscura pseudoobscura GA29053 (Dpse\GA29053), mRNA	sp|Q05049|MUC1_XENLA/1e-11/Integumentary mucin C.1 (Fragment) OS=Xenopus laevis PE=2 SV=1	crg:105338456/3e-09/immunoglobulin superfamily member 10-like; K16351 netrin-G2 ligand; K16359 netrin-G2	SSO2669/4e-09/---	NA	NA
Unigene40885_All	703	0.15	4.71	4.97269	4.82122e-09	4.02712e-08	Up	gi|8131883|gb|AAF73122.1|AF148508_1/8.9971e-17/aldehyde dehydrogenase [Placopecten magellanicus] &gt;gi|9957079|gb|AAG09204.1|AF175578_1 omega-crystallin [Placopecten magellanicus]	NA	sp|Q8MI17|AL1A1_RABIT/2e-14/Retinal dehydrogenase 1 OS=Oryctolagus cuniculus GN=ALDH1A1 PE=2 SV=1	gga:416880/2e-14/ALDH2; aldehyde dehydrogenase 2 family (mitochondrial); K00128 aldehyde dehydrogenase (NAD+) [EC:1.2.1.3]	BS_dhaS/3e-11/---	NA	biological_process:GO:0055114//oxidation-reduction process;molecular_function:GO:0016620//oxidoreductase activity, acting on the aldehyde or oxo group of donors, NAD or NADP as acceptor;
CL1783.Contig2_All	1278	0.11	3.43	4.96263	3.27766e-12	3.42937e-11	Up	gi|557153737|emb|CDI79308.1|/3.80464e-14/hypothetical protein, conserved [Eimeria praecox]	NA	sp|Q54UG3|Y1095_DICDI/9e-16/UPF0746 protein DDB_G0281095 OS=Dictyostelium discoideum GN=DDB_G0281095 PE=3 SV=1	aga:AgaP_AGAP012422/1e-12/AGAP012422-PA; K08867 WNK lysine deficient protein kinase [EC:2.7.11.1]	SPy2025/2e-06/---	PF00443/1.6E-15/Ubiquitin carboxyl-terminal hydrolase	NA
Unigene41493_All	570	0.19	5.92	4.96153	4.82122e-09	4.02768e-08	Up	NA	NA	NA	NA	NA	NA	NA
Unigene39272_All	321	0.36	11.05	4.93991	9.31796e-09	7.61034e-08	Up	NA	NA	NA	NA	NA	NA	NA
Unigene17220_All	705	0.15	4.55	4.92283	9.31796e-09	7.60931e-08	Up	NA	NA	NA	NA	NA	NA	NA
Unigene5086_All	2101	0.8	24	4.90689	9.55438e-128	9.91748e-126	Up	gi|556103341|gb|ESO91993.1|/1.49416e-75/hypothetical protein LOTGIDRAFT_233281 [Lottia gigantea]	NA	sp|O75936|BODG_HUMAN/1e-42/Gamma-butyrobetaine dioxygenase OS=Homo sapiens GN=BBOX1 PE=1 SV=1	aqu:100633264/9e-54/gamma-butyrobetaine dioxygenase-like; K00471 gamma-butyrobetaine dioxygenase [EC:1.14.11.1]	mll1440/4e-35/---	PF02668/3.4E-35/Taurine catabolism dioxygenase TauD, TfdA family	NA
CL1224.Contig1_All	2222	0.14	4.18	4.9	1.60587e-24	3.05704e-23	Up	gi|405963192|gb|EKC28789.1|/1.08196e-47/von Willebrand factor D and EGF domain-containing protein [Crassostrea gigas]	NA	sp|Q8N2E2|VWDE_HUMAN/1e-18/von Willebrand factor D and EGF domain-containing protein OS=Homo sapiens GN=VWDE PE=2 SV=4	crg:105322503/3e-10/uncharacterized LOC105322503; K12855 pre-mRNA-processing factor 6	NA	PS51233/15.945/VWFD domain profile.	NA
Unigene42816_All	837	0.25	7.44	4.8953	3.09244e-16	4.09708e-15	Up	gi|405970468|gb|EKC35367.1|/5.1452e-07/Carcinoembryonic antigen-related cell adhesion molecule 1 [Crassostrea gigas]	gi|457875982|ref|XM_004224445.1|/9e-11/Plasmodium cynomolgi strain B ubiquitin carboxyl-terminal hydrolase (PCYB_134200) mRNA, complete cds	NA	NA	NA	NA	NA
Unigene33434_All	661	0.16	4.72	4.88264	1.79933e-08	1.43442e-07	Up	NA	NA	NA	NA	NA	NA	NA
CL485.Contig5_All	1611	0.08	2.35	4.87652	9.10652e-11	8.67882e-10	Up	gi|405978740|gb|EKC43104.1|/6.11558e-39/hypothetical protein CGI_10022307 [Crassostrea gigas]	NA	NA	NA	NA	NA	NA
Unigene47739_All	1569	0.13	3.79	4.86561	5.96332e-16	7.76248e-15	Up	gi|81367609|gb|ABB71676.1|/0/C-type lectin D2 [Azumapecten farreri]	gi|81367608|gb|DQ209293.1|/5e-60/Chlamys farreri C-type lectin D2 mRNA, partial cds	sp|Q61830|MRC1_MOUSE/2e-24/Macrophage mannose receptor 1 OS=Mus musculus GN=Mrc1 PE=1 SV=2	crg:105338086/2e-134/macrophage mannose receptor 1-like; K06560 mannose receptor, C type	NA	PTHR22803/5.0E-50/--	NA
CL2155.Contig1_All	1897	0.68	19.54	4.84475	3.51686e-93	2.54006e-91	Up	gi|156402511|ref|XP_001639634.1|/2.30511e-96/predicted protein [Nematostella vectensis] &gt;gi|156226763|gb|EDO47571.1| predicted protein [Nematostella vectensis]	gi|602633573|ref|XM_007423603.1|/2e-29/PREDICTED: Python bivittatus hippocalcin-like 1 (HPCAL1), transcript variant X4, mRNA	sp|P42325|NCAH_DROME/2e-95/Neurocalcin homolog OS=Drosophila melanogaster GN=Nca PE=1 SV=2	lcm:102359888/3e-90/neurocalcin-delta A-like; K19695 neurocalcin delta	SPAC18B11.04/4e-66/---	PS50222/13.704/EF-hand calcium-binding domain profile.	biological_process:GO:0055114//oxidation-reduction process;molecular_function:GO:0016174//NAD(P)H oxidase activity;GO:0005509//calcium ion binding;
CL4810.Contig2_All	219	0.58	16.59	4.83812	3.47136e-08	2.69573e-07	Up	gi|508083713|gb|AGN03941.1|/3.90483e-06/silk sericin MG-2 [Galleria mellonella]	NA	NA	bacu:103020181/9e-07/MUC5B; mucin 5B, oligomeric mucus/gel-forming; K13908 mucin-5B	NA	NA	NA
Unigene4355_All	926	0.11	3.12	4.82597	4.3379e-09	3.63903e-08	Up	gi|405962584|gb|EKC28247.1|/1.32837e-70/Tenascin-X [Crassostrea gigas]	NA	sp|Q14162|SREC_HUMAN/9e-33/Scavenger receptor class F member 1 OS=Homo sapiens GN=SCARF1 PE=1 SV=3	crg:105333895/6e-58/uncharacterized LOC105333895; K18032 receptor-type tyrosine-protein phosphatase A [EC:3.1.3.48]	NA	SM00181/110.0/Epidermal growth factor-like domain.	NA
CL736.Contig2_All	864	0.28	7.91	4.82018	5.95686e-18	8.58209e-17	Up	gi|405967455|gb|EKC32610.1|/4.47044e-70/Titin [Crassostrea gigas]	gi|121047249|gb|EF148920.1|/1e-37/Chlamys farreri clone CFDD047 microsatellite sequence	sp|A4IGL7|PXDN_XENTR/2e-22/Peroxidasin OS=Xenopus tropicalis GN=pxdn PE=2 SV=1	crg:105321978/6e-64/hemicentin-1-like; K17341 hemicentin	all3346/1e-08/---	PS50835/6.742/Ig-like domain profile.	NA
CL3597.Contig1_All	648	1.87	52.79	4.81915	7.3229e-82	4.67828e-80	Up	NA	NA	NA	NA	NA	NA	NA
CL1939.Contig3_All	988	0.93	26.15	4.81344	1.97931e-63	9.68114e-62	Up	gi|405960948|gb|EKC26815.1|/5.16203e-47/Sushi, nidogen and EGF-like domain-containing protein 1 [Crassostrea gigas]	NA	sp|Q9YH85|TECTA_CHICK/2e-36/Alpha-tectorin OS=Gallus gallus GN=TECTA PE=1 SV=1	crg:105347527/3e-46/sodium- and chloride-dependent glycine transporter 1-like; K05038 solute carrier family 6 (neurotransmitter transporter, amino acid) member 5/7/9/14	NA	PF06119/4.5E-17/Nidogen-like	NA
CL340.Contig2_All	1789	0.53	14.83	4.80638	2.07706e-67	1.08641e-65	Up	gi|405962584|gb|EKC28247.1|/3.01515e-74/Tenascin-X [Crassostrea gigas]	NA	sp|Q9XWD6|CED1_CAEEL/3e-40/Cell death abnormality protein 1 OS=Caenorhabditis elegans GN=ced-1 PE=1 SV=1	crg:105333895/3e-56/uncharacterized LOC105333895; K18032 receptor-type tyrosine-protein phosphatase A [EC:3.1.3.48]	NA	SM00607/4.1E-5/eel-Fucolectin Tachylectin-4 Pentaxrin-1 Domain	NA
Unigene32665_All	3267	0.21	5.74	4.77259	4.0766e-48	1.48461e-46	Up	gi|405963064|gb|EKC28670.1|/6.56475e-84/Sushi, von Willebrand factor type A, EGF and pentraxin domain-containing protein 1 [Crassostrea gigas]	gi|380003210|gb|JF681187.1|/6e-06/Holotrichia oblita mucin-like protein (IIM) mRNA, partial cds	sp|Q05049|MUC1_XENLA/3e-23/Integumentary mucin C.1 (Fragment) OS=Xenopus laevis PE=2 SV=1	crg:105335345/2e-89/sushi, von Willebrand factor type A, EGF and pentraxin domain-containing protein 1-like; K17495 CUB and sushi domain-containing protein	YKR013w/6e-15/---	PTHR24050/2.5E-44/--	NA
CL2839.Contig2_All	2905	0.62	16.73	4.75403	2.53566e-122	2.47444e-120	Up	NA	NA	NA	NA	NA	NA	NA
Unigene32605_All	2041	0.49	13.13	4.74394	2.13954e-67	1.11812e-65	Up	gi|405971091|gb|EKC35946.1|/1.65086e-180/Serine--pyruvate aminotransferase, mitochondrial [Crassostrea gigas]	NA	sp|P31029|SPYA_CALJA/3e-125/Serine--pyruvate aminotransferase, mitochondrial OS=Callithrix jacchus GN=AGXT PE=2 SV=1	crg:105331916/0.0/serine--pyruvate aminotransferase-like; K00830 alanine-glyoxylate transaminase / serine-glyoxylate transaminase / serine-pyruvate transaminase [EC:2.6.1.44 2.6.1.45 2.6.1.51]	alr1004/9e-96/---	PTHR21152/2.7E-159/--	biological_process:GO:0019265//glycine biosynthetic process, by transamination of glyoxylate;cellular_component:GO:0005777//peroxisome;molecular_function:GO:0004760//serine-pyruvate transaminase activity;GO:0008453//alanine-glyoxylate transaminase activity;
CL1433.Contig16_All	387	0.29	7.71	4.73261	2.4775e-07	1.77429e-06	Up	NA	NA	NA	NA	NA	NA	NA
Unigene36577_All	497	0.22	5.82	4.72544	1.28819e-07	9.47073e-07	Up	NA	NA	NA	NA	NA	NA	NA
Unigene42005_All	664	0.16	4.23	4.72451	1.28819e-07	9.46958e-07	Up	gi|443695988|gb|ELT96769.1|/2.36787e-18/hypothetical protein CAPTEDRAFT_225117 [Capitella teleta]	NA	sp|Q6PAW2|UBP16_XENLA/8e-15/Ubiquitin carboxyl-terminal hydrolase 16 OS=Xenopus laevis GN=usp16 PE=2 SV=1	tca:655219/1e-16/ubiquitin carboxyl-terminal hydrolase 45; K11844 ubiquitin carboxyl-terminal hydrolase 16/45 [EC:3.4.19.12]	YER144c/2e-09/---	PS00973/-/Ubiquitin specific protease (USP) domain signature 2.	NA
CL1910.Contig2_All	518	0.21	5.55	4.72403	1.28819e-07	9.47304e-07	Up	NA	NA	NA	NA	NA	NA	NA
CL2897.Contig1_All	5674	0.27	7.12	4.72085	1.15497e-101	9.22572e-100	Up	gi|405963063|gb|EKC28669.1|/0/Sushi repeat-containing protein SRPX2 [Crassostrea gigas]	NA	sp|P0C6B8|SVEP1_RAT/4e-53/Sushi, von Willebrand factor type A, EGF and pentraxin domain-containing protein 1 OS=Rattus norvegicus GN=Svep1 PE=1 SV=1	crg:105335342/0.0/uncharacterized LOC105335342; K17495 CUB and sushi domain-containing protein	NA	PS00010/-/Aspartic acid and asparagine hydroxylation site.	NA
Unigene39391_All	1845	0.22	5.76	4.71049	2.233e-27	4.74015e-26	Up	gi|405961810|gb|EKC27555.1|/1.923e-23/Inter-alpha-trypsin inhibitor heavy chain H3 [Crassostrea gigas]	NA	sp|P56652|ITIH3_BOVIN/2e-12/Inter-alpha-trypsin inhibitor heavy chain H3 OS=Bos taurus GN=ITIH3 PE=1 SV=2	apla:101799864/7e-10/ITIH2; inter-alpha-trypsin inhibitor heavy chain 2; K19015 inter-alpha-trypsin inhibitor heavy chain H2	NA	PF06668/9.0E-11/Inter-alpha-trypsin inhibitor heavy chain C-terminus	NA
Unigene12030_All	1704	0.76	19.75	4.69971	2.91316e-83	1.88102e-81	Up	gi|405969999|gb|EKC34939.1|/5.23887e-20/hypothetical protein CGI_10016223 [Crassostrea gigas]	NA	NA	NA	NA	NA	NA
CL4782.Contig1_All	1448	0.73	18.54	4.6666	1.51315e-66	7.81291e-65	Up	gi|405972892|gb|EKC37639.1|/1.45591e-137/Protein SPATIAL [Crassostrea gigas]	NA	sp|Q32KL8|TBATA_BOVIN/1e-22/Protein TBATA OS=Bos taurus GN=TBATA PE=2 SV=1	NA	NA	PF15256/3.5E-44/SPATIAL	NA
Unigene40898_All	549	0.19	4.82	4.66496	4.75914e-07	3.30967e-06	Up	NA	NA	NA	NA	NA	NA	NA
Unigene40574_All	727	0.14	3.55	4.66432	4.75914e-07	3.31119e-06	Up	gi|405966381|gb|EKC31674.1|/3.9151e-124/Dynein heavy chain 6, axonemal [Crassostrea gigas]	gi|573883868|ref|XM_006630023.1|/5e-06/PREDICTED: Lepisosteus oculatus dynein heavy chain 6, axonemal-like (LOC102693084), mRNA	sp|Q9C0G6|DYH6_HUMAN/2e-107/Dynein heavy chain 6, axonemal OS=Homo sapiens GN=DNAH6 PE=1 SV=3	crg:105319445/8e-125/dynein heavy chain 6, axonemal-like; K10408 dynein heavy chain, axonemal	YKR054c/3e-19/---	PF12775/1.5E-38/P-loop containing dynein motor region D3	NA
CL485.Contig2_All	1590	0.16	4.02	4.65105	4.30048e-17	5.91051e-16	Up	gi|405978740|gb|EKC43104.1|/2.29533e-38/hypothetical protein CGI_10022307 [Crassostrea gigas]	NA	NA	NA	NA	NA	NA
Unigene41387_All	962	0.21	5.26	4.6466	4.1139e-13	4.55064e-12	Up	NA	NA	NA	NA	NA	NA	NA
CL1025.Contig3_All	789	0.13	3.25	4.64386	4.75914e-07	3.3089e-06	Up	NA	NA	NA	NA	NA	NA	NA
Unigene39207_All	652	0.16	3.99	4.64024	4.75914e-07	3.31158e-06	Up	NA	NA	NA	NA	NA	NA	NA
Unigene46649_All	766	0.14	3.49	4.63973	2.4775e-07	1.7745e-06	Up	gi|405973669|gb|EKC38367.1|/1.29646e-27/hypothetical protein CGI_10002322 [Crassostrea gigas]	NA	sp|Q9XWD6|CED1_CAEEL/4e-06/Cell death abnormality protein 1 OS=Caenorhabditis elegans GN=ced-1 PE=1 SV=1	crg:105343558/9e-30/receptor-type tyrosine-protein phosphatase S-like; K06776 receptor-type tyrosine-protein phosphatase kappa [EC:3.1.3.48]	NA	PF00754/3.4E-9/F5/8 type C domain	NA
Unigene45607_All	1385	0.15	3.73	4.63614	1.11842e-13	1.28256e-12	Up	NA	NA	NA	NA	NA	NA	NA
CL3273.Contig1_All	2981	0.27	6.71	4.63528	2.13524e-50	8.2125e-49	Up	gi|405961269|gb|EKC27101.1|/3.9176e-11/hypothetical protein CGI_10014923 [Crassostrea gigas]	NA	NA	NA	NA	NA	NA
Unigene31633_All	803	0.13	3.19	4.61697	4.75914e-07	3.31043e-06	Up	gi|405966381|gb|EKC31674.1|/2.21009e-89/Dynein heavy chain 6, axonemal [Crassostrea gigas]	NA	sp|Q9C0G6|DYH6_HUMAN/2e-55/Dynein heavy chain 6, axonemal OS=Homo sapiens GN=DNAH6 PE=1 SV=3	crg:105319445/3e-115/dynein heavy chain 6, axonemal-like; K10408 dynein heavy chain, axonemal	NA	PTHR10676:SF136/8.2E-28/--	NA
Unigene46478_All	1699	0.23	5.64	4.61599	2.86082e-24	5.38652e-23	Up	gi|405962147|gb|EKC27849.1|/1.42325e-09/hypothetical protein CGI_10022631 [Crassostrea gigas]	NA	NA	NA	NA	PS50923/9.825/Sushi/CCP/SCR domain profile.	NA
Unigene42663_All	752	0.14	3.42	4.6105	4.75914e-07	3.31005e-06	Up	gi|405953305|gb|EKC20993.1|/8.88653e-34/hypothetical protein CGI_10004888 [Crassostrea gigas]	NA	NA	NA	NA	NA	NA
CL2464.Contig2_All	1467	0.44	10.72	4.60666	2.536e-39	7.52293e-38	Up	gi|405969151|gb|EKC34146.1|/8.10524e-11/hypothetical protein CGI_10004148 [Crassostrea gigas]	NA	NA	NA	NA	NA	NA
CL509.Contig2_All	1645	0.43	10.47	4.60578	9.58464e-43	3.08942e-41	Up	gi|167538689|ref|XP_001751006.1|/2.25146e-12/hypothetical protein [Monosiga brevicollis MX1] &gt;gi|163770485|gb|EDQ84176.1| predicted protein [Monosiga brevicollis MX1]	gi|470264126|ref|XM_004361056.1|/1e-11/Dictyostelium fasciculatum D111/G-patch domain-containing protein (DFA_05394) mRNA, complete cds	sp|Q05049|MUC1_XENLA/8e-09/Integumentary mucin C.1 (Fragment) OS=Xenopus laevis PE=2 SV=1	xtr:100498375/2e-08/mucin-2-like; K10955 intestinal mucin-2	YPO0507/2e-08/---	NA	NA
CL5409.Contig2_All	643	0.16	3.89	4.60363	9.13042e-07	6.15169e-06	Up	NA	NA	NA	NA	NA	NA	NA
CL1848.Contig1_All	1058	0.77	18.71	4.60281	7.36472e-48	2.66598e-46	Up	NA	NA	NA	NA	NA	NA	NA
Unigene33048_All	447	0.24	5.83	4.60239	9.13042e-07	6.151e-06	Up	gi|556108328|gb|ESO96980.1|/4.12419e-27/hypothetical protein LOTGIDRAFT_115312, partial [Lottia gigantea]	NA	sp|O00370|LORF2_HUMAN/8e-10/LINE-1 retrotransposable element ORF2 protein OS=Homo sapiens PE=1 SV=1	NA	NA	PTHR19446:SF321/6.3E-19/--	NA
Unigene32098_All	547	0.2	4.84	4.59694	4.75914e-07	3.30928e-06	Up	NA	NA	NA	NA	NA	NA	NA
Unigene1159_All	2805	0.28	6.71	4.58281	5.14712e-47	1.82167e-45	Up	gi|556112037|gb|ESP00689.1|/2.60312e-150/hypothetical protein LOTGIDRAFT_157979 [Lottia gigantea]	NA	NA	NA	XF0221/1e-68/---	PF05960/3.9E-129/Bacterial protein of unknown function (DUF885)	NA
Unigene6806_All	2253	0.57	13.61	4.57756	2.28386e-75	1.34114e-73	Up	gi|564248157|ref|XP_006263171.1|/8.65073e-77/PREDICTED: aldose reductase-like [Alligator mississippiensis]	NA	sp|P45376|ALDR_MOUSE/2e-73/Aldose reductase OS=Mus musculus GN=Akr1b1 PE=1 SV=3	amj:102567910/2e-77/aldose reductase-like; K00011 aldehyde reductase [EC:1.1.1.21]	slr0942/6e-51/---	PS00062/-/Aldo/keto reductase family signature 2.	NA
Unigene32195_All	858	0.24	5.7	4.56986	1.509e-12	1.61528e-11	Up	NA	NA	NA	NA	NA	NA	NA
CL3144.Contig2_All	1540	0.23	5.43	4.56125	1.12994e-21	1.92118e-20	Up	NA	NA	NA	NA	NA	NA	NA
Unigene36078_All	495	0.22	5.19	4.56016	9.13042e-07	6.15306e-06	Up	NA	NA	NA	NA	NA	NA	NA
Unigene37425_All	708	0.15	3.51	4.54844	9.13042e-07	6.15031e-06	Up	gi|405978320|gb|EKC42721.1|/2.37602e-06/Tripartite motif-containing protein 2 [Crassostrea gigas]	gi|21211769|emb|AL590616.23|/1e-06/Mouse DNA sequence from clone RP23-231P12 on chromosome 13, complete sequence	NA	crg:105347509/9e-07/tripartite motif-containing protein 45-like; K11997 tripartite motif-containing protein 2/3	NA	NA	NA
Unigene41283_All	550	0.19	4.43	4.54324	1.74927e-06	1.14135e-05	Up	gi|405974076|gb|EKC38746.1|/3.48691e-33/AP-4 complex subunit beta-1 [Crassostrea gigas]	NA	sp|Q9WV76|AP4B1_MOUSE/2e-24/AP-4 complex subunit beta-1 OS=Mus musculus GN=Ap4b1 PE=2 SV=2	crg:105341710/8e-34/AP-4 complex subunit beta-1-like; K12401 AP-4 complex subunit beta-1	SPBC947.02/2e-10/---	PF01602/2.0E-13/Adaptin N terminal region	biological_process:GO:0006810//transport;cellular_component:GO:0016020//membrane;
CL2530.Contig1_All	3253	0.27	6.29	4.54203	1.00893e-50	3.93065e-49	Up	gi|405959786|gb|EKC25779.1|/0/WD repeat-containing protein 78 [Crassostrea gigas]	gi|589949213|ref|XM_006987203.1|/6e-09/PREDICTED: Peromyscus maniculatus bairdii WD repeat domain 78 (Wdr78), mRNA	sp|Q5VTH9|WDR78_HUMAN/3e-180/WD repeat-containing protein 78 OS=Homo sapiens GN=WDR78 PE=2 SV=1	hsa:27019/2e-69/DNAI1, CILD1, DIC1, ICS1, PCD; dynein, axonemal, intermediate chain 1; K10409 dynein intermediate chain 1, axonemal	YBR103w/3e-07/---	SM00320/2.4/WD40 repeats	NA
Unigene38118_All	609	0.17	3.96	4.54189	1.74927e-06	1.14086e-05	Up	gi|260793753|ref|XP_002591875.1|/5.8753e-28/hypothetical protein BRAFLDRAFT_89390 [Branchiostoma floridae] &gt;gi|229277087|gb|EEN47886.1| hypothetical protein BRAFLDRAFT_89390 [Branchiostoma floridae]	NA	sp|P23093|CSP_PLABA/3e-20/Circumsporozoite protein OS=Plasmodium berghei (strain Anka) PE=3 SV=1	fab:101816860/2e-28/WASF2; WAS protein family, member 2; K05748 WAS protein family, member 2	XF0818/5e-21/---	NA	NA
Unigene32203_All	723	0.29	6.71	4.53219	2.88684e-12	3.03574e-11	Up	NA	gi|58331731|emb|CR361569.11|/1e-09/Zebrafish DNA sequence from clone CH211-99I20 in linkage group 8, complete sequence	NA	NA	NA	NA	NA
CL2881.Contig3_All	1610	1.64	37.69	4.52241	1.35705e-145	1.61104e-143	Up	gi|405970811|gb|EKC35682.1|/6.71903e-70/Sushi repeat-containing protein SRPX2 [Crassostrea gigas]	NA	sp|Q70E20|SNED1_MOUSE/3e-16/Sushi, nidogen and EGF-like domain-containing protein 1 OS=Mus musculus GN=Sned1 PE=2 SV=2	spu:100890001/1e-24/sushi, von Willebrand factor type A, EGF and pentraxin domain-containing protein 1; K17495 CUB and sushi domain-containing protein	NA	PF00008/1.5E-8/EGF-like domain	NA
Unigene33092_All	968	0.11	2.51	4.51211	9.13042e-07	6.15237e-06	Up	gi|405962102|gb|EKC27806.1|/8.57836e-124/Synaptotagmin-C [Crassostrea gigas]	NA	sp|Q9R0N4|SYT10_MOUSE/2e-36/Synaptotagmin-10 OS=Mus musculus GN=Syt10 PE=1 SV=1	ola:101162836/1e-34/synaptotagmin-A-like; K15290 synaptotagmin-1	NA	PTHR10024/5.4E-60/--	NA
Unigene34934_All	1181	0.09	2.04	4.5025	9.13042e-07	6.15375e-06	Up	gi|528468077|ref|XP_005171012.1|/2.39792e-68/PREDICTED: uncharacterized protein LOC101883163 [Danio rerio]	NA	NA	NA	NA	PTHR19277/2.5E-73/--	NA
CL736.Contig1_All	1504	0.18	4.08	4.5025	3.09244e-16	4.09618e-15	Up	gi|405967455|gb|EKC32610.1|/3.52486e-110/Titin [Crassostrea gigas]	gi|121047249|gb|EF148920.1|/5e-54/Chlamys farreri clone CFDD047 microsatellite sequence	sp|A2ASS6|TITIN_MOUSE/1e-26/Titin OS=Mus musculus GN=Ttn PE=1 SV=1	crg:105321978/1e-101/hemicentin-1-like; K17341 hemicentin	all7128_2/4e-10/---	PR01832/9.1E-5/Vascular endothelial growth factor receptor signature	NA
CL2824.Contig4_All	2579	0.15	3.4	4.5025	4.27824e-23	7.69267e-22	Up	gi|405975752|gb|EKC40300.1|/2.87374e-39/hypothetical protein CGI_10023735 [Crassostrea gigas]	NA	sp|Q8SX83|SPEN_DROME/9e-08/Protein split ends OS=Drosophila melanogaster GN=spen PE=1 SV=2	crg:105337759/5e-09/apoptotic chromatin condensation inducer in the nucleus-like; K12875 apoptotic chromatin condensation inducer in the nucleus	SSO2249/8e-10/---	NA	NA
CL4810.Contig1_All	347	0.33	7.48	4.5025	1.74927e-06	1.14123e-05	Up	gi|156371598|ref|XP_001628850.1|/1.95508e-13/predicted protein [Nematostella vectensis] &gt;gi|156215836|gb|EDO36787.1| predicted protein [Nematostella vectensis]	NA	NA	NA	NA	NA	NA
Unigene36076_All	701	0.15	3.4	4.5025	1.74927e-06	1.14073e-05	Up	NA	NA	NA	NA	NA	NA	NA
Unigene33471_All	747	0.14	3.17	4.50098	1.74927e-06	1.14147e-05	Up	NA	NA	NA	NA	NA	SM00032/2.1E-4/Domain abundant in complement control proteins; SUSHI repeat; short complement-like repeat (SCR)	NA
Unigene39287_All	302	0.39	8.82	4.49923	1.74927e-06	1.1411e-05	Up	NA	NA	NA	NA	NA	NA	NA
Unigene37579_All	496	0.22	4.97	4.49767	1.74927e-06	1.1416e-05	Up	gi|524875823|ref|XP_005094634.1|/1.09229e-15/PREDICTED: beta-1,3-galactosyltransferase 1-like [Aplysia californica]	NA	sp|Q6ZMB0|B3GN6_HUMAN/6e-12/UDP-GlcNAc:betaGal beta-1,3-N-acetylglucosaminyltransferase 6 OS=Homo sapiens GN=B3GNT6 PE=1 SV=2	crg:105345302/3e-13/beta-1,3-galactosyltransferase 1-like; K07819 beta-1,3-galactosyltransferase 1 [EC:2.4.1.-]	NA	PF01762/2.9E-14/Galactosyltransferase	NA
CL2669.Contig2_All	1345	1.72	38.57	4.487	5.21182e-123	5.12748e-121	Up	NA	NA	NA	NA	NA	NA	NA
CL801.Contig6_All	2119	0.18	4.02	4.48113	3.05364e-22	5.30259e-21	Up	gi|556096104|gb|ESO84756.1|/7.54792e-51/hypothetical protein LOTGIDRAFT_236111 [Lottia gigantea]	NA	sp|Q6DDY9|RT07_XENLA/3e-32/28S ribosomal protein S7, mitochondrial OS=Xenopus laevis GN=mrps7 PE=2 SV=1	cfo:105249098/1e-35/28S ribosomal protein S7, mitochondrial; K02992 small subunit ribosomal protein S7	RC0173/9e-17/---	PS50017/8.762/Death domain profile.	NA
Unigene34233_All	920	0.45	10.04	4.47969	1.39062e-22	2.45507e-21	Up	NA	NA	NA	NA	NA	NA	NA
Unigene32255_All	973	0.21	4.68	4.47805	1.05404e-11	1.07069e-10	Up	gi|440899351|gb|ELR50663.1|/1.33849e-07/hypothetical protein M91_01402, partial [Bos mutus]	NA	NA	NA	NA	NA	NA
CL2112.Contig1_All	2162	0.14	3.12	4.47805	3.73064e-17	5.14845e-16	Up	gi|556099957|gb|ESO88609.1|/3.44858e-75/hypothetical protein LOTGIDRAFT_165393 [Lottia gigantea]	NA	NA	crg:105347506/4e-16/uncharacterized LOC105347506; K05094 fibroblast growth factor receptor 3 [EC:2.7.10.1]	NA	PS00022/-/EGF-like domain signature 1.	NA
Unigene34883_All	2502	0.2	4.45	4.47573	5.33824e-28	1.15473e-26	Up	gi|405951908|gb|EKC19777.1|/0/Atrial natriuretic peptide-converting enzyme [Crassostrea gigas]	NA	sp|Q80YN4|CORIN_RAT/1e-84/Atrial natriuretic peptide-converting enzyme OS=Rattus norvegicus GN=Corin PE=1 SV=2	crg:105319684/0.0/atrial natriuretic peptide-converting enzyme-like; K09614 corin [EC:3.4.21.-]	VC1649/6e-28/---	PS50038/17.071/Frizzled (fz) domain profile.	NA
Unigene45263_All	610	0.17	3.78	4.47478	3.34642e-06	2.11525e-05	Up	NA	gi|513184665|ref|XM_420756.4|/1e-06/PREDICTED: Gallus gallus zinc finger, CCHC domain containing 4 (ZCCHC4), mRNA	NA	NA	NA	NA	NA
CL4084.Contig1_All	417	0.26	5.78	4.47449	3.34642e-06	2.1168e-05	Up	NA	NA	NA	NA	NA	NA	NA
Unigene34898_All	824	0.38	8.44	4.47317	3.73064e-17	5.14963e-16	Up	NA	NA	NA	NA	NA	NA	NA
Unigene47395_All	1725	0.58	12.87	4.47182	7.16796e-54	2.96695e-52	Up	gi|405974833|gb|EKC39446.1|/1.42357e-81/Fibropellin-1 [Crassostrea gigas]	NA	sp|A8TX70|CO6A5_HUMAN/3e-23/Collagen alpha-5(VI) chain OS=Homo sapiens GN=COL6A5 PE=1 SV=1	crg:105319391/1e-66/fibropellin-1-like; K02599 Notch	NA	PF00092/2.3E-28/von Willebrand factor type A domain	NA
Unigene31393_All	532	0.2	4.39	4.45615	3.34642e-06	2.11481e-05	Up	NA	NA	NA	NA	NA	NA	NA
Unigene31648_All	656	0.16	3.49	4.44708	3.34642e-06	2.11725e-05	Up	NA	NA	NA	NA	NA	NA	NA
Unigene42191_All	1638	0.18	3.92	4.44478	2.586e-16	3.43744e-15	Up	gi|405963064|gb|EKC28670.1|/4.60684e-58/Sushi, von Willebrand factor type A, EGF and pentraxin domain-containing protein 1 [Crassostrea gigas]	NA	sp|Q05049|MUC1_XENLA/4e-15/Integumentary mucin C.1 (Fragment) OS=Xenopus laevis PE=2 SV=1	crg:105335345/9e-59/sushi, von Willebrand factor type A, EGF and pentraxin domain-containing protein 1-like; K17495 CUB and sushi domain-containing protein	YKR013w/3e-09/---	PF07699/7.0E-7/GCC2 and GCC3	NA
Unigene40715_All	492	0.22	4.79	4.44445	3.34642e-06	2.11591e-05	Up	NA	NA	NA	NA	NA	NA	NA
CL456.Contig6_All	2651	0.67	14.53	4.43873	8.21054e-94	6.00924e-92	Up	gi|405969074|gb|EKC34084.1|/0/Spermatogenesis-associated protein 18-like protein [Crassostrea gigas]	gi|524875820|ref|XM_005094576.1|/3e-16/PREDICTED: Aplysia californica mitochondria-eating protein-like (LOC101857320), mRNA	sp|Q503Q1|MIEAP_DANRE/4e-106/Mitochondria-eating protein OS=Danio rerio GN=spata18 PE=2 SV=2	cmk:103189866/8e-08/cit; citron rho-interacting serine/threonine kinase; K16308 citron Rho-interacting kinase [EC:2.7.11.1]	NA	PTHR21771:SF0/1.3E-164/--	NA
Unigene41297_All	592	0.18	3.9	4.43741	3.34642e-06	2.11458e-05	Up	gi|556112037|gb|ESP00689.1|/1.50369e-49/hypothetical protein LOTGIDRAFT_157979 [Lottia gigantea]	NA	NA	NA	CC1056/7e-20/---	PF05960/1.1E-39/Bacterial protein of unknown function (DUF885)	NA
Unigene45787_All	565	0.19	4.11	4.43507	3.34642e-06	2.11503e-05	Up	NA	NA	NA	NA	NA	NA	NA
Unigene45210_All	2124	0.37	7.99	4.4326	2.08766e-41	6.54039e-40	Up	gi|443710450|gb|ELU04703.1|/1.50518e-99/hypothetical protein CAPTEDRAFT_222965 [Capitella teleta]	NA	sp|Q0VAA2|LRC74_HUMAN/2e-59/Leucine-rich repeat-containing protein 74 OS=Homo sapiens GN=LRRC74 PE=2 SV=2	hgl:101701752/9e-39/Lrrc74b; leucine rich repeat containing 74B; K07374 tubulin alpha	NA	PTHR24114/4.0E-127/--	NA
Unigene32343_All	444	0.25	5.38	4.42761	3.34642e-06	2.11569e-05	Up	NA	NA	NA	NA	NA	NA	NA
CL2817.Contig3_All	2682	0.41	8.81	4.42545	1.39649e-57	6.179e-56	Up	gi|405975713|gb|EKC40262.1|/2.56534e-131/Ankyrin repeat domain-containing protein 50 [Crassostrea gigas]	NA	sp|C9JTQ0|ANR63_HUMAN/9e-17/Ankyrin repeat domain-containing protein 63 OS=Homo sapiens GN=ANKRD63 PE=4 SV=1	aqu:100639165/1e-15/transient receptor potential cation channel subfamily A member 1 homolog; K04984 transient receptor potential cation channel subfamily A member 1	FN0178/2e-12/---	PS50088/9.965/Ankyrin repeat profile.	NA
Unigene32318_All	569	0.19	4.08	4.4245	3.34642e-06	2.11636e-05	Up	NA	NA	NA	NA	NA	NA	NA
Unigene37684_All	808	0.13	2.79	4.42368	3.34642e-06	2.11547e-05	Up	gi|403373188|gb|EJY86511.1|/3.54255e-10/hypothetical protein OXYTRI_13588 [Oxytricha trifallax]	NA	sp|O76329|ACTNB_DICDI/6e-08/Interaptin OS=Dictyostelium discoideum GN=abpD PE=1 SV=1	ola:101171418/1e-08/clip1; CAP-GLY domain containing linker protein 1; K10421 CAP-Gly domain-containing linker protein 1	PAB2181/1e-07/---	NA	NA
CL56.Contig3_All	896	0.2	4.29	4.42291	1.76759e-10	1.65066e-09	Up	gi|405950735|gb|EKC18702.1|/1.07094e-61/Phospholipid scramblase 2 [Crassostrea gigas]	NA	sp|P58195|PLS1_RAT/6e-26/Phospholipid scramblase 1 OS=Rattus norvegicus GN=Plscr1 PE=1 SV=1	NA	NA	PTHR23248/4.2E-51/--	NA
Unigene11298_All	522	0.21	4.49	4.41825	3.34642e-06	2.11702e-05	Up	gi|405950372|gb|EKC18365.1|/1.10675e-59/Histone-lysine N-methyltransferase PRDM9 [Crassostrea gigas]	gi|556959237|ref|XM_005990305.1|/1e-08/PREDICTED: Latimeria chalumnae B-cell CLL/lymphoma 11B (zinc finger protein) (BCL11B), transcript variant X2, mRNA	sp|Q96IR2|ZN845_HUMAN/1e-57/Zinc finger protein 845 OS=Homo sapiens GN=ZNF845 PE=2 SV=3	mdo:100618612/7e-59/ZNF208; zinc finger protein 208; K09228 KRAB domain-containing zinc finger protein	SPAC144.09c/8e-17/---	PS00028/-/Zinc finger C2H2 type domain signature.	NA
Unigene39101_All	2149	0.32	6.84	4.41785	5.2084e-36	1.41874e-34	Up	gi|405969530|gb|EKC34496.1|/0/Heat shock 70 kDa protein 12A [Crassostrea gigas]	NA	sp|Q9CZJ2|HS12B_MOUSE/4e-94/Heat shock 70 kDa protein 12B OS=Mus musculus GN=Hspa12b PE=1 SV=1	aqu:100633272/3e-27/uncharacterized LOC100633272; K10380 ankyrin	lin1510/6e-10/---	PF00012/2.8E-9/Hsp70 protein	NA
Unigene32726_All	548	0.19	4.06	4.41741	6.3916e-06	3.88495e-05	Up	gi|405967400|gb|EKC32564.1|/3.0476e-37/Poly [ADP-ribose] polymerase 14 [Crassostrea gigas]	NA	sp|Q460N5|PAR14_HUMAN/2e-10/Poly [ADP-ribose] polymerase 14 OS=Homo sapiens GN=PARP14 PE=1 SV=3	crg:105347211/4e-41/poly [ADP-ribose] polymerase 15-like; K15261 poly [ADP-ribose] polymerase 10/14/15 [EC:2.4.2.30]	lin2902/8e-07/---	PTHR14453:SF53/2.3E-23/--	NA
Unigene37751_All	838	0.12	2.56	4.41504	6.3916e-06	3.88573e-05	Up	NA	NA	NA	NA	NA	NA	NA
Unigene46599_All	1081	0.28	5.96	4.41181	4.92466e-16	6.43685e-15	Up	NA	NA	NA	NA	NA	NA	NA
Unigene35883_All	737	0.14	2.94	4.39232	6.3916e-06	3.88377e-05	Up	gi|405952219|gb|EKC20057.1|/1.85525e-105/Uncharacterized protein CXorf22 [Crassostrea gigas]	gi|524885634|ref|XM_005099366.1|/1e-09/PREDICTED: Aplysia californica putative uncharacterized protein CXorf30-like (LOC101855792), mRNA	sp|Q80W93|HYDIN_MOUSE/4e-11/Hydrocephalus-inducing protein OS=Mus musculus GN=Hydin PE=2 SV=2	ocu:100347308/1e-12/HYDIN; HYDIN, axonemal central pair apparatus protein; K17570 hydrocephalus-inducing protein	NA	PTHR23053/1.6E-45/--	NA
Unigene43234_All	690	0.15	3.15	4.39232	6.3916e-06	3.88221e-05	Up	NA	NA	NA	NA	NA	NA	NA
Unigene45453_All	454	0.24	5.01	4.3837	6.3916e-06	3.88182e-05	Up	NA	gi|193734852|gb|EU623933.1|/1e-08/Argopecten irradians clone HWDD051 microsatellite sequence	NA	NA	NA	NA	NA
Unigene37768_All	1064	0.1	2.08	4.37851	3.34642e-06	2.11658e-05	Up	gi|524900342|ref|XP_005106592.1|/1.18718e-34/PREDICTED: uncharacterized protein LOC101850747 [Aplysia californica]	NA	sp|P78539|SRPX_HUMAN/3e-17/Sushi repeat-containing protein SRPX OS=Homo sapiens GN=SRPX PE=2 SV=1	crg:105349172/5e-39/sushi, von Willebrand factor type A, EGF and pentraxin domain-containing protein 1-like; K17495 CUB and sushi domain-containing protein	NA	PF02494/4.4E-11/HYR domain	NA
CL1093.Contig3_All	1615	0.26	5.4	4.37638	9.63936e-22	1.6431e-20	Up	gi|524910869|ref|XP_005110308.1|/1.42585e-120/PREDICTED: calumenin-like isoform X3 [Aplysia californica]	gi|58866046|ref|NM_213675.2|/2e-07/Xenopus (Silurana) tropicalis calumenin (calu), mRNA	sp|Q6XLQ7|CALU_RABIT/2e-100/Calumenin OS=Oryctolagus cuniculus GN=CALU PE=1 SV=2	crg:105338364/1e-07/neo-calmodulin-like; K02183 calmodulin	NA	PF13499/5.9E-11/EF-hand domain pair	NA
Unigene32515_All	493	0.22	4.56	4.37346	6.3916e-06	3.88417e-05	Up	NA	gi|110321655|emb|CR384092.19|/8e-07/Zebrafish DNA sequence from clone DKEY-43A9 in linkage group 24, complete sequence	NA	NA	NA	NA	NA
Unigene32085_All	458	0.24	4.96	4.36923	6.3916e-06	3.88652e-05	Up	NA	NA	NA	NA	NA	NA	NA
Unigene32776_All	461	0.24	4.92	4.35755	6.3916e-06	3.88534e-05	Up	NA	NA	NA	NA	NA	NA	NA
Unigene17319_All	2517	2.78	56.9	4.35527	0	0	Up	gi|524892586|ref|XP_005102820.1|/4.88367e-84/PREDICTED: uncharacterized protein LOC101848762 [Aplysia californica]	NA	sp|A6NMZ7|CO6A6_HUMAN/8e-60/Collagen alpha-6(VI) chain OS=Homo sapiens GN=COL6A6 PE=1 SV=2	crg:105329078/3e-82/uncharacterized LOC105329078; K05719 integrin beta 1; K06238 collagen, type VI, alpha	NA	PF00092/7.0E-41/von Willebrand factor type A domain	NA
Unigene32969_All	772	0.13	2.66	4.35484	1.21867e-05	7.10855e-05	Up	NA	NA	NA	NA	NA	NA	NA
Unigene33849_All	871	0.24	4.91	4.35462	7.30638e-11	7.01757e-10	Up	gi|405961381|gb|EKC27192.1|/1.69765e-24/hypothetical protein CGI_10015422 [Crassostrea gigas]	NA	NA	NA	NA	NA	NA
CL454.Contig2_All	857	0.46	9.4	4.35295	2.95554e-20	4.73798e-19	Up	gi|556099120|gb|ESO87772.1|/9.85001e-62/hypothetical protein LOTGIDRAFT_204466 [Lottia gigantea]	NA	sp|A1A4Q2|PRXD1_BOVIN/7e-37/Prolyl-tRNA synthetase associated domain-containing protein 1 OS=Bos taurus GN=PRORSD1 PE=2 SV=1	NA	CC0111/1e-24/---	PTHR31423/9.2E-70/--	NA
CL2881.Contig1_All	1609	1.42	28.95	4.3496	8.37396e-110	7.35104e-108	Up	gi|405970811|gb|EKC35682.1|/1.95494e-69/Sushi repeat-containing protein SRPX2 [Crassostrea gigas]	NA	sp|Q70E20|SNED1_MOUSE/2e-16/Sushi, nidogen and EGF-like domain-containing protein 1 OS=Mus musculus GN=Sned1 PE=2 SV=2	spu:100890001/2e-23/sushi, von Willebrand factor type A, EGF and pentraxin domain-containing protein 1; K17495 CUB and sushi domain-containing protein	NA	PTHR24050:SF21/1.4E-23/--	NA
CL4107.Contig1_All	1816	0.39	7.94	4.34759	6.80414e-35	1.79739e-33	Up	gi|405978649|gb|EKC43020.1|/6.05116e-139/Laminin-like protein epi-1 [Crassostrea gigas]	NA	sp|Q14789|GOGB1_HUMAN/4e-16/Golgin subfamily B member 1 OS=Homo sapiens GN=GOLGB1 PE=1 SV=2	dre:797680/4e-21/clip1a, si:dkey-273o13.1; CAP-GLY domain containing linker protein 1a; K10421 CAP-Gly domain-containing linker protein 1	Ta0787/8e-11/---	PTHR18937/5.2E-57/--	NA
Unigene35316_All	758	0.14	2.85	4.34746	6.3916e-06	3.88456e-05	Up	gi|405976268|gb|EKC40781.1|/5.57095e-92/hypothetical protein CGI_10021272 [Crassostrea gigas]	NA	sp|Q3UES3|TNKS2_MOUSE/2e-13/Tankyrase-2 OS=Mus musculus GN=Tnks2 PE=2 SV=2	mmu:74493/2e-12/Tnks2, 5430432P15Rik, AA517131, AI662480, ARTD6, TNKS-2, Tank2; tankyrase, TRF1-interacting ankyrin-related ADP-ribose polymerase 2 (EC:2.4.2.30); K10799 tankyrase [EC:2.4.2.30]	FN0178/4e-08/---	PF12796/5.5E-16/Ankyrin repeats (3 copies)	NA
Unigene32507_All	573	0.19	3.86	4.34453	6.3916e-06	3.88299e-05	Up	NA	NA	NA	NA	NA	NA	NA
Unigene37703_All	682	0.15	3.04	4.34104	1.21867e-05	7.10786e-05	Up	NA	NA	NA	NA	NA	NA	NA
CL2470.Contig5_All	1364	1.01	20.39	4.33543	7.69572e-66	3.91988e-64	Up	gi|308482738|ref|XP_003103572.1|/5.79989e-24/CRE-CLEC-202 protein [Caenorhabditis remanei] &gt;gi|308259993|gb|EFP03946.1| CRE-CLEC-202 protein [Caenorhabditis remanei]	gi|193734852|gb|EU623933.1|/4e-14/Argopecten irradians clone HWDD051 microsatellite sequence	sp|Q05049|MUC1_XENLA/2e-18/Integumentary mucin C.1 (Fragment) OS=Xenopus laevis PE=2 SV=1	xtr:100493286/1e-18/muc2; mucin 2, oligomeric mucus/gel-forming; K10955 intestinal mucin-2	YKR013w/5e-09/---	NA	NA
CL928.Contig1_All	611	0.42	8.47	4.3339	7.88186e-13	8.5693e-12	Up	NA	NA	NA	NA	NA	NA	NA
Unigene37034_All	819	0.13	2.62	4.33298	6.3916e-06	3.88612e-05	Up	gi|405965100|gb|EKC30522.1|/2.75393e-34/Multiple epidermal growth factor-like domains 10 [Crassostrea gigas]	NA	sp|A8XMW6|CED1_CAEBR/6e-17/Cell death abnormality protein 1 OS=Caenorhabditis briggsae GN=ced-1 PE=3 SV=2	crg:105343558/4e-33/receptor-type tyrosine-protein phosphatase S-like; K06776 receptor-type tyrosine-protein phosphatase kappa [EC:3.1.3.48]	NA	PF00754/2.5E-5/F5/8 type C domain	NA
CL1588.Contig1_All	699	0.4	8.06	4.33271	3.03272e-14	3.58341e-13	Up	NA	NA	NA	NA	NA	NA	NA
Unigene32645_All	557	0.19	3.8	4.32193	1.21867e-05	7.11199e-05	Up	gi|405968286|gb|EKC33368.1|/1.03828e-27/Carbohydrate sulfotransferase 15 [Crassostrea gigas]	NA	sp|Q7LFX5|CHSTF_HUMAN/6e-07/Carbohydrate sulfotransferase 15 OS=Homo sapiens GN=CHST15 PE=1 SV=1	crg:105320595/2e-28/carbohydrate sulfotransferase 15-like; K08106 N-acetylgalactosamine 4-sulfate 6-O-sulfotransferase [EC:2.8.2.33]	NA	PTHR15723/5.9E-13/--	NA
Unigene34996_All	587	0.18	3.58	4.31389	1.21867e-05	7.10993e-05	Up	NA	NA	NA	NA	NA	NA	NA
CL2402.Contig2_All	2784	4.45	88.46	4.31315	0	0	Up	gi|56269442|gb|AAH86844.1|/2.27481e-13/Selenoprotein P, plasma, 1b [Danio rerio]	NA	sp|Q98SV0|SELPB_DANRE/4e-15/Selenoprotein Pb OS=Danio rerio GN=sepp1b PE=2 SV=3	NA	NA	PF04592/2.4E-12/Selenoprotein P, N terminal region	NA
Unigene46711_All	374	0.3	5.96	4.31228	1.21867e-05	7.1113e-05	Up	NA	NA	NA	NA	NA	NA	NA
Unigene32084_All	1398	0.57	11.31	4.31049	1.66011e-37	4.69817e-36	Up	NA	NA	NA	NA	NA	NA	NA
Unigene45225_All	589	0.18	3.57	4.30986	1.21867e-05	7.11061e-05	Up	gi|405969693|gb|EKC34647.1|/4.05257e-31/hypothetical protein CGI_10023187 [Crassostrea gigas]	NA	NA	NA	NA	NA	NA
Unigene36299_All	999	0.41	8.09	4.30244	1.64827e-19	2.55998e-18	Up	gi|405971735|gb|EKC36552.1|/1.80556e-27/Sodium-dependent glucose transporter 1 [Crassostrea gigas]	NA	sp|Q8VCV9|NAGTA_MOUSE/2e-13/Sodium-dependent glucose transporter 1A OS=Mus musculus GN=Naglt1a PE=2 SV=2	crg:105334087/4e-28/sodium-dependent glucose transporter 1A-like; K08175 MFS transporter, FHS family, Na+ dependent glucose transporter 1	NA	NA	NA
Unigene35797_All	539	0.2	3.94	4.30012	1.21867e-05	7.10924e-05	Up	gi|47209649|emb|CAF91513.1|/4.53725e-38/unnamed protein product [Tetraodon nigroviridis]	gi|620963276|ref|XM_007668412.1|/2e-10/PREDICTED: Ornithorhynchus anatinus malate synthase, glyoxysomal-like (LOC100081596), transcript variant X2, mRNA	sp|Q8T2K9|MASY_DICDI/6e-17/Malate synthase OS=Dictyostelium discoideum GN=masA PE=2 SV=2	nve:NEMVE_v1g160432/5e-10/hypothetical protein ; K01638 malate synthase [EC:2.3.3.9]	YNL117w/1e-16/---	PTHR21631:SF1/5.2E-52/--	NA
Unigene42553_All	668	0.16	3.11	4.28077	1.21867e-05	7.11268e-05	Up	gi|405950372|gb|EKC18365.1|/7.14299e-47/Histone-lysine N-methyltransferase PRDM9 [Crassostrea gigas]	NA	sp|Q0VAW7|ZN112_MOUSE/2e-44/Zinc finger protein 112 OS=Mus musculus GN=Znf112 PE=2 SV=2	tup:102500965/2e-43/zinc finger protein 596-like; K09228 KRAB domain-containing zinc finger protein	SPAC144.09c/1e-18/---	PS00028/-/Zinc finger C2H2 type domain signature.	NA
CL874.Contig5_All	1550	0.33	6.37	4.27076	8.24634e-24	1.52787e-22	Up	NA	NA	NA	NA	NA	PS50017/8.923/Death domain profile.	NA
CL2204.Contig2_All	630	0.63	12.15	4.26946	1.46366e-18	2.16934e-17	Up	gi|405968575|gb|EKC33635.1|/3.32266e-16/hypothetical protein CGI_10020077 [Crassostrea gigas]	NA	NA	NA	NA	NA	NA
Unigene46405_All	1522	0.26	5.01	4.26823	1.12341e-18	1.67326e-17	Up	gi|443686980|gb|ELT90097.1|/2.6273e-52/hypothetical protein CAPTEDRAFT_218731 [Capitella teleta]	NA	sp|P42519|STAR_DROME/5e-14/Protein Star OS=Drosophila melanogaster GN=S PE=2 SV=1	dmo:Dmoj_GI21985/4e-13/GI21985 gene product from transcript GI21985-RA; K16310 serine/threonine-protein kinase NIM1 [EC:2.7.11.1]	NA	PF05050/1.2E-11/Methyltransferase FkbM domain	NA
CL2665.Contig1_All	2791	0.46	8.86	4.2676	1.31726e-58	5.94174e-57	Up	gi|407907627|gb|AFU48616.1|/1.78622e-50/toll-like receptor d [Mytilus galloprovincialis]	NA	sp|Q8SPE9|TLR4_PONPY/8e-29/Toll-like receptor 4 OS=Pongo pygmaeus GN=TLR4 PE=3 SV=1	crg:105324722/3e-60/toll-like receptor 4; K10159 toll-like receptor 2	NA	PF01582/9.9E-14/TIR domain	NA
CL2590.Contig1_All	636	11.51	221.47	4.26615	4e-306	1.23709e-303	Up	NA	NA	NA	NA	NA	NA	NA
Unigene31524_All	765	0.14	2.69	4.26411	1.21867e-05	7.10649e-05	Up	gi|405967139|gb|EKC32339.1|/4.17058e-26/E3 ubiquitin-protein ligase TRIM33 [Crassostrea gigas]	NA	sp|O75382|TRIM3_HUMAN/5e-12/Tripartite motif-containing protein 3 OS=Homo sapiens GN=TRIM3 PE=1 SV=2	crg:105319940/4e-25/uncharacterized LOC105319940; K11997 tripartite motif-containing protein 2/3	NA	PS00518/-/Zinc finger RING-type signature.	NA
Unigene47619_All	551	0.19	3.65	4.26383	2.3192e-05	0.000130533	Up	NA	NA	NA	NA	NA	NA	NA
Unigene35278_All	718	0.15	2.88	4.26303	1.21867e-05	7.10718e-05	Up	gi|405963784|gb|EKC29331.1|/9.70453e-120/Calcium-activated potassium channel subunit alpha-1 [Crassostrea gigas]	gi|512926841|ref|XM_004931129.1|/2e-11/PREDICTED: Bombyx mori calcium-activated potassium channel slowpoke-like (LOC101738409), mRNA	sp|Q03720|SLO_DROME/2e-103/Calcium-activated potassium channel slowpoke OS=Drosophila melanogaster GN=slo PE=1 SV=3	crg:105338529/2e-120/calcium-activated potassium channel slowpoke-like; K04936 potassium large conductance calcium-activated channel subfamily M alpha member 1	kch/7e-10/---	PR01449/1.0E-20/Calcium-activated BK potassium channel alpha subunit signature	NA
Unigene32457_All	466	0.23	4.4	4.2578	2.3192e-05	0.000130509	Up	gi|260807884|ref|XP_002598738.1|/1.87463e-32/hypothetical protein BRAFLDRAFT_95854 [Branchiostoma floridae] &gt;gi|229284012|gb|EEN54750.1| hypothetical protein BRAFLDRAFT_95854 [Branchiostoma floridae]	NA	sp|P86179|CSL3_ONCKE/6e-29/L-rhamnose-binding lectin CSL3 OS=Oncorhynchus keta PE=1 SV=1	pxy:105381165/3e-13/latrophilin Cirl; K04593 latrophilin 2	NA	PTHR12011/9.7E-43/--	NA
CL4942.Contig1_All	779	0.13	2.48	4.25376	4.40448e-05	0.000237994	Up	gi|405977926|gb|EKC42350.1|/3.31421e-10/hypothetical protein CGI_10018260 [Crassostrea gigas]	NA	NA	NA	NA	NA	NA
Unigene32593_All	780	0.4	7.63	4.25361	2.3155e-14	2.75757e-13	Up	NA	NA	NA	NA	NA	NA	NA
CL456.Contig2_All	3555	1.29	24.52	4.24852	2.759e-204	4.90825e-202	Up	gi|405969074|gb|EKC34084.1|/0/Spermatogenesis-associated protein 18-like protein [Crassostrea gigas]	gi|524875820|ref|XM_005094576.1|/4e-16/PREDICTED: Aplysia californica mitochondria-eating protein-like (LOC101857320), mRNA	sp|Q503Q1|MIEAP_DANRE/2e-117/Mitochondria-eating protein OS=Danio rerio GN=spata18 PE=2 SV=2	NA	NA	PTHR21771/2.4E-156/--	biological_process:GO:0033554//cellular response to stress;GO:0007005//mitochondrion organization;cellular_component:GO:0016020//membrane;GO:0005739//mitochondrion;
CL566.Contig3_All	1274	0.24	4.55	4.24476	2.3155e-14	2.75702e-13	Up	gi|405968914|gb|EKC33940.1|/1.51095e-79/hypothetical protein CGI_10017873 [Crassostrea gigas]	NA	NA	NA	NA	PS50853/9.279/Fibronectin type-III domain profile.	NA
CL433.Contig3_All	3049	0.32	6.06	4.24317	7.5859e-44	2.51092e-42	Up	gi|405959936|gb|EKC25909.1|/5.99949e-15/hypothetical protein CGI_10007200 [Crassostrea gigas]	NA	NA	crg:105321978/6e-13/hemicentin-1-like; K17341 hemicentin	NA	SM00406/0.0063/Immunoglobulin V-Type	NA
Unigene45804_All	437	0.25	4.73	4.24184	2.3192e-05	0.000130387	Up	NA	NA	NA	NA	NA	NA	NA
Unigene42688_All	1207	0.12	2.27	4.24159	1.28819e-07	9.47189e-07	Up	gi|405967455|gb|EKC32610.1|/9.92821e-86/Titin [Crassostrea gigas]	NA	sp|Q92626|PXDN_HUMAN/1e-25/Peroxidasin homolog OS=Homo sapiens GN=PXDN PE=1 SV=2	crg:105321978/1e-75/hemicentin-1-like; K17341 hemicentin	all3346/5e-08/---	PS50835/14.292/Ig-like domain profile.	NA
Unigene46837_All	396	1.12	21.18	4.24113	2.12746e-18	3.13316e-17	Up	gi|524913028|ref|XP_005111348.1|/2.99833e-14/PREDICTED: cytochrome P450 2U1-like [Aplysia californica]	NA	sp|O57525|CP17A_RANDY/2e-09/Steroid 17-alpha-hydroxylase/17,20 lyase OS=Rana dybowskii GN=CYP17A1 PE=2 SV=1	acs:100557193/6e-11/cytochrome P450 2U1; K07422 cytochrome P450, family 2, subfamily U, polypeptide 1	NA	NA	NA
Unigene45510_All	511	0.21	3.97	4.24068	2.3192e-05	0.000130484	Up	NA	NA	NA	NA	NA	NA	NA
Unigene8980_All	1173	1.03	19.47	4.24054	1.1319e-52	4.58448e-51	Up	gi|556103597|gb|ESO92249.1|/3.61319e-08/hypothetical protein LOTGIDRAFT_87855, partial [Lottia gigantea]	NA	NA	NA	NA	NA	NA
Unigene39724_All	559	0.19	3.59	4.23991	2.3192e-05	0.000130521	Up	gi|405958413|gb|EKC24543.1|/2.06794e-68/Regulator of G-protein signaling 22 [Crassostrea gigas]	gi|260829446|ref|XM_002609627.1|/9e-07/Branchiostoma floridae hypothetical protein, mRNA	sp|Q8NE09|RGS22_HUMAN/2e-29/Regulator of G-protein signaling 22 OS=Homo sapiens GN=RGS22 PE=1 SV=3	ecb:100061011/7e-30/RGS22; regulator of G-protein signaling 22; K16449 regulator of G-protein signaling	NA	PTHR10845:SF132/7.5E-44/--	cellular_component:GO:0005886//plasma membrane;GO:0005737//cytoplasm;molecular_function:GO:0005096//GTPase activator activity;
Unigene37098_All	423	0.26	4.91	4.23914	2.3192e-05	0.000130448	Up	NA	NA	NA	NA	NA	NA	NA
Unigene40929_All	294	0.4	7.53	4.23458	2.3192e-05	0.000130497	Up	NA	NA	NA	NA	NA	NA	NA
CL4741.Contig1_All	1530	0.32	6.02	4.23362	7.28686e-23	1.29863e-21	Up	gi|405961048|gb|EKC26908.1|/5.76898e-15/Tripartite motif-containing protein 3 [Crassostrea gigas]	NA	sp|Q13263|TIF1B_HUMAN/4e-10/Transcription intermediary factor 1-beta OS=Homo sapiens GN=TRIM28 PE=1 SV=5	crg:105325403/1e-15/uncharacterized LOC105325403; K11997 tripartite motif-containing protein 2/3	NA	PS50119/10.111/Zinc finger B-box type profile.	NA
CL3513.Contig1_All	289	0.41	7.68	4.22741	2.3192e-05	0.000130558	Up	NA	NA	NA	NA	NA	PF02195/8.5E-5/ParB-like nuclease domain	NA
Unigene37720_All	882	0.58	10.85	4.2255	2.00956e-22	3.51895e-21	Up	gi|405971735|gb|EKC36552.1|/4.88575e-35/Sodium-dependent glucose transporter 1 [Crassostrea gigas]	NA	sp|A4QN56|NAGT1_DANRE/2e-06/Sodium-dependent glucose transporter 1 OS=Danio rerio GN=naglt1 PE=2 SV=1	crg:105334087/1e-35/sodium-dependent glucose transporter 1A-like; K08175 MFS transporter, FHS family, Na+ dependent glucose transporter 1	NA	NA	NA
Unigene33185_All	991	1.84	34.31	4.22085	1.26141e-77	7.69195e-76	Up	NA	NA	NA	NA	NA	NA	NA
CL1786.Contig4_All	3312	0.38	7.07	4.21764	2.81102e-56	1.21004e-54	Up	gi|405962841|gb|EKC28484.1|/0/Putative methyltransferase NSUN7 [Crassostrea gigas]	NA	sp|Q14AW5|NSUN7_MOUSE/1e-89/Putative methyltransferase NSUN7 OS=Mus musculus GN=Nsun7 PE=2 SV=2	bfo:BRAFLDRAFT_211078/1e-27/hypothetical protein; K15264 putative methyltransferase [EC:2.1.1.-]	SPAC2C4.06c/3e-22/---	PTHR14663/8.2E-161/--	NA
Unigene35221_All	390	0.29	5.39	4.21616	2.3192e-05	0.000130472	Up	NA	NA	NA	NA	NA	NA	NA
CL1083.Contig2_All	3956	0.24	4.46	4.21594	1.27958e-42	4.11788e-41	Up	gi|405969440|gb|EKC34411.1|/0/Transmembrane channel-like protein 7 [Crassostrea gigas]	gi|309256117|gb|HQ197425.1|/8e-24/Argopecten purpuratus clone B118 microsatellite sequence	sp|Q4R7U0|TMC7_MACFA/3e-97/Transmembrane channel-like protein 7 OS=Macaca fascicularis GN=TMC7 PE=2 SV=1	tsp:Tsp_10860/2e-08/7 transmembrane receptor; K10877 DNA repair and recombination protein RAD54B [EC:3.6.4.-]	NA	PF07810/1.9E-33/TMC domain	NA
Unigene43211_All	598	0.18	3.33	4.20945	2.3192e-05	0.00013046	Up	NA	NA	NA	NA	NA	NA	NA
Unigene47053_All	499	0.22	4.07	4.20945	2.3192e-05	0.000130399	Up	NA	NA	NA	NA	NA	NA	NA
CL5289.Contig2_All	2602	0.22	4.07	4.20945	2.55634e-26	5.21013e-25	Up	gi|405950280|gb|EKC18277.1|/7.15779e-38/hypothetical protein CGI_10013876 [Crassostrea gigas]	gi|55294906|emb|BX950852.8|/7e-08/Zebrafish DNA sequence from clone DKEY-154B17 in linkage group 19, complete sequence	sp|Q80VI1|TRI56_MOUSE/5e-16/E3 ubiquitin-protein ligase TRIM56 OS=Mus musculus GN=Trim56 PE=1 SV=1	crg:105319940/6e-26/uncharacterized LOC105319940; K11997 tripartite motif-containing protein 2/3	NA	PF00097/2.2E-8/Zinc finger, C3HC4 type (RING finger)	NA
CL1503.Contig1_All	682	1.31	24.16	4.20498	3.14658e-37	8.84268e-36	Up	NA	NA	NA	NA	NA	NA	NA
Unigene13504_All	832	0.5	9.21	4.2032	4.02638e-18	5.84975e-17	Up	NA	NA	NA	NA	NA	PF00531/1.1E-5/Death domain	NA
Unigene40713_All	812	0.13	2.39	4.20043	2.3192e-05	0.000130424	Up	NA	NA	NA	NA	NA	NA	NA
Unigene42547_All	639	0.16	2.94	4.19967	4.40448e-05	0.00023808	Up	gi|405945743|gb|EKC17457.1|/1.24237e-13/hypothetical protein CGI_10000793 [Crassostrea gigas]	NA	NA	NA	NA	NA	NA
Unigene37997_All	818	0.13	2.38	4.19438	2.3192e-05	0.000130411	Up	gi|405959191|gb|EKC25252.1|/9.81762e-24/hypothetical protein CGI_10014284 [Crassostrea gigas]	NA	sp|Q8MJA0|FOXP2_PANTR/4e-20/Forkhead box protein P2 OS=Pan troglodytes GN=FOXP2 PE=2 SV=1	crg:105322369/2e-63/forkhead box protein P1-like; K09409 forkhead box protein P	YBR112c/7e-07/---	NA	NA
Unigene31516_All	2608	0.98	17.94	4.19425	2.86762e-108	2.48478e-106	Up	gi|405977658|gb|EKC42097.1|/1.90279e-123/Cathepsin F [Crassostrea gigas]	gi|38683930|gb|AY390282.1|/2e-08/Periserrula leucophryna cysteine protease mRNA, complete cds	sp|Q9R013|CATF_MOUSE/6e-90/Cathepsin F OS=Mus musculus GN=Ctsf PE=2 SV=1	crg:105333177/4e-124/uncharacterized LOC105333177; K01373 cathepsin F [EC:3.4.22.41]	AF1946_2/5e-16/---	PS00287/-/Cysteine proteases inhibitors signature.	NA
Unigene33760_All	549	0.19	3.47	4.19086	4.40448e-05	0.000237888	Up	NA	NA	NA	NA	NA	NA	NA
CL4093.Contig2_All	475	0.46	8.38	4.18724	1.80494e-09	1.56554e-08	Up	NA	NA	NA	NA	NA	NA	NA
CL4743.Contig2_All	767	0.14	2.55	4.187	2.3192e-05	0.000130436	Up	NA	NA	NA	NA	NA	NA	NA
CL3674.Contig2_All	526	0.2	3.64	4.18587	4.40448e-05	0.000237845	Up	NA	NA	NA	NA	NA	NA	NA
Unigene36555_All	432	0.25	4.54	4.18269	4.40448e-05	0.000238101	Up	NA	NA	NA	NA	NA	NA	NA
Unigene36369_All	432	0.25	4.54	4.18269	4.40448e-05	0.000237909	Up	gi|123437955|ref|XP_001309767.1|/2.9042e-17/ankyrin repeat protein [Trichomonas vaginalis G3]	NA	sp|Q54KA7|SECG_DICDI/7e-13/Ankyrin repeat, PH and SEC7 domain containing protein secG OS=Dictyostelium discoideum GN=secG PE=2 SV=1	dmo:Dmoj_GI10353/1e-12/GI10353 gene product from transcript GI10353-RA; K10799 tankyrase [EC:2.4.2.30]	FN0178/2e-10/---	SM00248/3.7/ankyrin repeats	NA
CL667.Contig2_All	644	0.33	5.99	4.18202	1.80494e-09	1.566e-08	Up	gi|405950280|gb|EKC18277.1|/2.33629e-12/hypothetical protein CGI_10013876 [Crassostrea gigas]	NA	NA	crg:105327122/2e-06/E3 ubiquitin-protein ligase TRIM71-like; K12026 tripartite motif-containing protein 56 [EC:2.3.2.27]	NA	NA	NA
CL433.Contig2_All	731	0.28	5.08	4.18133	3.41608e-09	2.8939e-08	Up	gi|195377194|ref|XP_002047377.1|/1.1393e-07/GJ13404 [Drosophila virilis] &gt;gi|194154535|gb|EDW69719.1| GJ13404 [Drosophila virilis]	NA	NA	tca:662504/3e-06/Pmp5-a; peritrophic matrix protein 5-A; K01873 valyl-tRNA synthetase [EC:6.1.1.9]	NA	NA	NA
Unigene46395_All	468	0.23	4.15	4.17341	4.40448e-05	0.000238037	Up	NA	NA	NA	NA	NA	NA	NA
Unigene32500_All	327	0.35	6.28	4.16534	4.40448e-05	0.000237824	Up	NA	NA	NA	NA	NA	NA	NA
CL1624.Contig3_All	1341	0.39	6.99	4.16375	2.00956e-22	3.51997e-21	Up	NA	NA	NA	NA	NA	NA	NA
Unigene18414_All	344	0.33	5.91	4.16262	4.40448e-05	0.000238058	Up	NA	NA	NA	NA	NA	NA	NA
Unigene37240_All	490	0.22	3.94	4.16262	4.40448e-05	0.00023793	Up	gi|405976546|gb|EKC41048.1|/3.06277e-76/Dynein heavy chain 10, axonemal [Crassostrea gigas]	gi|585666790|ref|XM_006817118.1|/9e-13/PREDICTED: Saccoglossus kowalevskii dynein heavy chain 10, axonemal-like (LOC100374422), mRNA	sp|Q8IVF4|DYH10_HUMAN/2e-60/Dynein heavy chain 10, axonemal OS=Homo sapiens GN=DNAH10 PE=1 SV=4	crg:105343293/8e-77/dynein heavy chain 10, axonemal-like; K10408 dynein heavy chain, axonemal	YKR054c/5e-06/---	PTHR10676:SF135/1.1E-85/--	biological_process:GO:0007018//microtubule-based movement;cellular_component:GO:0030286//dynein complex;molecular_function:GO:0005524//ATP binding;GO:0003777//microtubule motor activity;GO:0016887//ATPase activity;
Unigene199_All	264	0.91	16.27	4.1602	3.41608e-09	2.89472e-08	Up	NA	gi|77539190|emb|CT009550.5|/3e-08/Mouse DNA sequence from clone RP23-38F20 on chromosome 14, complete sequence	NA	NA	NA	NA	NA
CL3572.Contig2_All	3036	1.04	18.59	4.15987	5.52364e-130	5.8442e-128	Up	gi|405974545|gb|EKC39180.1|/1.02639e-99/Collagen alpha-1(IX) chain [Crassostrea gigas]	gi|452108623|gb|KC477414.1|/3e-07/Trioxys pallidus microsatellite TpMSAT02 sequence	sp|P20849|CO9A1_HUMAN/3e-68/Collagen alpha-1(IX) chain OS=Homo sapiens GN=COL9A1 PE=1 SV=3	crg:105326709/2e-100/collagen alpha-2(IX) chain-like; K08131 collagen, type IX, alpha	ML2591/5e-08/---	PTHR24023/6.7E-50/--	NA
CL2234.Contig2_All	3115	3.12	55.68	4.15754	0	0	Up	gi|585682081|ref|XP_006812173.1|/2.01775e-21/PREDICTED: RNA-directed DNA polymerase from mobile element jockey-like, partial [Saccoglossus kowalevskii]	NA	NA	pxy:105395227/3e-10/116 kDa U5 small nuclear ribonucleoprotein component-like; K12852 116 kDa U5 small nuclear ribonucleoprotein component	NA	NA	NA
CL874.Contig3_All	1512	0.29	5.17	4.15604	5.92862e-19	8.95425e-18	Up	NA	NA	NA	NA	NA	PF00531/1.2E-5/Death domain	NA
Unigene31733_All	1580	0.38	6.76	4.15295	2.46036e-25	4.83478e-24	Up	gi|405970344|gb|EKC35258.1|/7.66407e-103/Putative proline dehydrogenase 2 [Crassostrea gigas]	NA	sp|Q6PAY6|PROD2_XENLA/2e-87/Probable proline dehydrogenase 2 OS=Xenopus laevis GN=prodh2 PE=2 SV=1	crg:105335583/7e-104/probable proline dehydrogenase 2; K11394 hydroxyproline oxidase [EC:1.5.-.-]	SPCC70.03c/2e-24/---	PF01619/4.2E-56/Proline dehydrogenase	biological_process:GO:0044710//single-organism metabolic process;
CL1773.Contig2_All	844	0.49	8.71	4.15182	2.71898e-17	3.78174e-16	Up	NA	NA	NA	NA	NA	NA	NA
Unigene32522_All	365	0.31	5.51	4.15171	4.40448e-05	0.000237973	Up	NA	NA	NA	NA	NA	NA	NA
CL865.Contig4_All	4921	0.14	2.48	4.14684	2.4937e-30	5.75105e-29	Up	gi|405972170|gb|EKC36956.1|/0/Rho guanine nucleotide exchange factor 12 [Crassostrea gigas]	NA	sp|O15085|ARHGB_HUMAN/9e-106/Rho guanine nucleotide exchange factor 11 OS=Homo sapiens GN=ARHGEF11 PE=1 SV=1	crg:105330610/0.0/rho guanine nucleotide exchange factor 11-like; K12331 Rho guanine nucleotide exchange factor 11	SPAC1006.06/3e-16/---	PF09128/5.4E-38/Regulator of G protein signalling-like domain	NA
Unigene32627_All	357	0.32	5.66	4.14466	4.40448e-05	0.000238144	Up	NA	NA	NA	NA	NA	NA	NA
Unigene45761_All	662	0.16	2.83	4.14466	4.40448e-05	0.000237952	Up	NA	NA	NA	NA	NA	NA	NA
Unigene42216_All	594	0.18	3.18	4.14296	4.40448e-05	0.000237866	Up	NA	NA	NA	NA	NA	NA	NA
Unigene46873_All	428	0.26	4.59	4.14191	4.40448e-05	0.000238186	Up	NA	NA	NA	NA	NA	NA	NA
Unigene43348_All	443	0.25	4.41	4.14078	4.40448e-05	0.000237802	Up	NA	NA	NA	NA	NA	NA	NA
Unigene31731_All	684	0.3	5.29	4.14023	1.2876e-09	1.12818e-08	Up	NA	NA	NA	NA	NA	NA	NA
CL1769.Contig5_All	1953	0.28	4.93	4.13809	2.96228e-23	5.36645e-22	Up	NA	NA	NA	NA	NA	NA	NA
Unigene6960_All	922	1.22	21.36	4.12996	2.92988e-44	9.77296e-43	Up	gi|405951627|gb|EKC19524.1|/2.27361e-38/Williams-Beuren syndrome chromosomal region 27 protein [Crassostrea gigas]	NA	sp|Q8N6F8|WBS27_HUMAN/1e-18/Williams-Beuren syndrome chromosomal region 27 protein OS=Homo sapiens GN=WBSCR27 PE=2 SV=2	NA	NA	PTHR10108:SF726/2.6E-27/--	NA
Unigene1254_All	545	0.2	3.5	4.12928	4.40448e-05	0.000238016	Up	NA	NA	NA	NA	NA	NA	NA
Unigene31596_All	571	0.19	3.32	4.12711	4.40448e-05	0.000238165	Up	NA	NA	NA	NA	NA	NA	NA
Unigene38500_All	574	0.19	3.3	4.11839	4.40448e-05	0.000238122	Up	gi|524893821|ref|XP_005103419.1|/1.78482e-65/PREDICTED: EF-hand calcium-binding domain-containing protein 5-like [Aplysia californica]	NA	sp|A4FU69|EFCB5_HUMAN/1e-24/EF-hand calcium-binding domain-containing protein 5 OS=Homo sapiens GN=EFCAB5 PE=1 SV=3	NA	NA	PTHR31938/3.8E-58/--	NA
CL2372.Contig1_All	699	0.22	3.82	4.118	4.75914e-07	3.31081e-06	Up	gi|405958085|gb|EKC24248.1|/9.62178e-29/Calmodulin [Crassostrea gigas]	NA	sp|Q95NR9|CALM_METSE/4e-27/Calmodulin OS=Metridium senile PE=1 SV=3	crg:105328007/7e-33/calmodulin-like; K02183 calmodulin	SPAC3A12.14/4e-20/---	PF13405/2.3E-4/EF-hand domain	NA
Unigene46833_All	725	0.14	2.42	4.11151	8.34578e-05	0.000430554	Up	NA	NA	NA	NA	NA	NA	NA
CL1180.Contig3_All	3955	0.29	5.01	4.11069	5.12984e-47	1.81662e-45	Up	gi|2541914|dbj|BAA22852.1|/4.78571e-68/troponin I [Mizuhopecten yessoensis]	gi|2541913|dbj|AB008005.1|/1e-139/Patinopecten yessoensis mRNA for troponin I, complete cds	sp|Q7M3Y3|TNNI_CHLNI/6e-67/Troponin I OS=Chlamys nipponensis akazara PE=1 SV=2	mcc:717358/3e-21/uncharacterized LOC717358; K18626 trichohyalin	NMB0700/2e-09/---	PF00992/1.9E-28/Troponin	NA
CL719.Contig1_All	1890	0.11	1.9	4.11042	3.41608e-09	2.89512e-08	Up	gi|405977750|gb|EKC42184.1|/1.80266e-16/Major facilitator superfamily domain-containing protein 1 [Crassostrea gigas]	NA	sp|Q04832|HEXP_LEIMA/5e-10/DNA-binding protein HEXBP OS=Leishmania major GN=HEXBP PE=4 SV=1	hgl:101725388/1e-08/Zcchc13; zinc finger, CCHC domain containing 13; K09250 cellular nucleic acid-binding protein	YNL255c/8e-09/---	PF00098/3.8E-4/Zinc knuckle	NA
CL493.Contig1_All	1002	19.02	327.32	4.10511	0	0	Up	gi|167525968|ref|XP_001747318.1|/1.25872e-08/hypothetical protein [Monosiga brevicollis MX1] &gt;gi|163774153|gb|EDQ87785.1| predicted protein [Monosiga brevicollis MX1]	gi|374428414|emb|FQ310506.3|/6e-28/Dicentrarchus labrax chromosome sequence corresponding to linkage group 1, top part, complete sequence	sp|Q02722|Q300_MOUSE/8e-06/Protein Q300 OS=Mus musculus GN=Hpvc2 PE=4 SV=1	dre:100331906/6e-08/si:ch73-40a17.1; K16340 PH domain and leucine-rich repeat-containing protein phosphatase [EC:3.1.3.16]	NA	NA	biological_process:GO:0008152//metabolic process;cellular_component:GO:0016020//membrane;
Unigene31518_All	686	2.34	40.24	4.10405	3.03952e-60	1.40897e-58	Up	gi|405975599|gb|EKC40153.1|/1.13128e-18/Pancreatic secretory granule membrane major glycoprotein GP2 [Crassostrea gigas]	NA	sp|Q8R4V5|OIT3_MOUSE/2e-16/Oncoprotein-induced transcript 3 protein OS=Mus musculus GN=Oit3 PE=2 SV=2	ssc:100511125/8e-15/uromodulin-like; K18274 uromodulin	NA	PTHR22962:SF57/1.5E-26/--	NA
Unigene39642_All	1415	0.35	5.97	4.0923	6.09624e-20	9.62944e-19	Up	gi|405956058|gb|EKC22892.1|/1.78744e-07/hypothetical protein CGI_10001268 [Crassostrea gigas]	NA	NA	NA	NA	NA	NA
CL2812.Contig1_All	762	0.27	4.59	4.08746	1.21888e-08	9.87352e-08	Up	NA	gi|348020199|gb|JN703458.1|/1e-06/Chlamys farreri clone BAC Bam123C08, complete sequence	NA	NA	NA	NA	NA
CL1633.Contig2_All	1911	0.78	13.23	4.0842	9.02884e-58	4.01853e-56	Up	gi|405950728|gb|EKC18696.1|/1.9492e-26/hypothetical protein CGI_10011514 [Crassostrea gigas]	NA	sp|P08799|MYS2_DICDI/3e-11/Myosin-2 heavy chain OS=Dictyostelium discoideum GN=mhcA PE=1 SV=3	hst:105188449/4e-08/CAP-Gly domain-containing linker protein 1; K10421 CAP-Gly domain-containing linker protein 1	NA	NA	NA
CL3053.Contig4_All	3689	1.76	29.83	4.08312	8.92378e-250	1.98589e-247	Up	gi|405954119|gb|EKC21644.1|/1.92276e-180/hypothetical protein CGI_10003535 [Crassostrea gigas]	gi|325197137|ref|NM_001204491.1|/1e-119/Aplysia californica catalytic subunit of protein kinase A (CAPLA), mRNA >gi|5576|emb|X63420.1| A.californica CAPL-A mRNA ( alternative exon cassette A1)	sp|P12370|KAPC_DROME/7e-174/cAMP-dependent protein kinase catalytic subunit OS=Drosophila melanogaster GN=Pka-C1 PE=1 SV=3	crg:105336635/0.0/cAMP-dependent protein kinase catalytic subunit-like; K04345 protein kinase A [EC:2.7.11.11]	SPAC17G8.14c_2/3e-59/---	PS51285/12.814/AGC-kinase C-terminal domain profile.	biological_process:GO:0006468//protein phosphorylation;molecular_function:GO:0004674//protein serine/threonine kinase activity;GO:0005524//ATP binding;
Unigene31649_All	586	0.18	3.05	4.08274	8.34578e-05	0.000430222	Up	gi|405950460|gb|EKC18447.1|/1.02936e-47/Deleted in lung and esophageal cancer protein 1 [Crassostrea gigas]	NA	sp|Q9Y238|DLEC1_HUMAN/3e-17/Deleted in lung and esophageal cancer protein 1 OS=Homo sapiens GN=DLEC1 PE=2 SV=2	NA	NA	PTHR23053:SF1/3.4E-24/--	NA
Unigene35814_All	437	0.25	4.23	4.08066	8.34578e-05	0.000430186	Up	NA	NA	NA	NA	NA	NA	NA
Unigene1069_All	471	0.23	3.89	4.08006	8.34578e-05	0.000430296	Up	NA	NA	NA	NA	NA	NA	NA
Unigene32254_All	620	0.17	2.87	4.07744	8.34578e-05	0.000430517	Up	NA	gi|348020200|gb|JN703459.1|/3e-10/Chlamys farreri clone BAC Bam040H03, complete sequence	NA	NA	NA	NA	NA
Unigene42170_All	5626	0.31	5.23	4.07647	4.21444e-68	2.22561e-66	Up	gi|405967455|gb|EKC32610.1|/0/Titin [Crassostrea gigas]	NA	sp|Q96RW7|HMCN1_HUMAN/7e-88/Hemicentin-1 OS=Homo sapiens GN=HMCN1 PE=1 SV=2	crg:105321978/0.0/hemicentin-1-like; K17341 hemicentin	RSc1775/1e-14/---	PS50835/11.37/Ig-like domain profile.	NA
CL2062.Contig3_All	2321	0.36	6.07	4.07563	4.43656e-33	1.11437e-31	Up	gi|405969447|gb|EKC34418.1|/2.09465e-126/Carbohydrate sulfotransferase 15 [Crassostrea gigas]	NA	sp|Q7LFX5|CHSTF_HUMAN/5e-77/Carbohydrate sulfotransferase 15 OS=Homo sapiens GN=CHST15 PE=1 SV=1	crg:105322577/4e-127/carbohydrate sulfotransferase 15-like; K08106 N-acetylgalactosamine 4-sulfate 6-O-sulfotransferase [EC:2.8.2.33]	NA	PTHR15723:SF0/1.2E-132/--	NA
Unigene45765_All	7493	0.35	5.89	4.07284	1.564e-101	1.24271e-99	Up	gi|405978586|gb|EKC42964.1|/0/hypothetical protein CGI_10023564 [Crassostrea gigas]	NA	NA	NA	NA	PTHR16897:SF2/3.2E-193/--	NA
CL3026.Contig1_All	1087	0.28	4.71	4.07223	3.75726e-12	3.91826e-11	Up	gi|405951331|gb|EKC19253.1|/2.43118e-32/hypothetical protein CGI_10009106 [Crassostrea gigas]	NA	NA	NA	NA	NA	NA
Unigene37798_All	514	0.21	3.53	4.07121	8.34578e-05	0.000430443	Up	NA	NA	NA	NA	NA	NA	NA
CL4273.Contig1_All	442	0.25	4.2	4.07039	8.34578e-05	0.00043037	Up	gi|512890090|ref|XP_004920935.1|/4.57233e-26/PREDICTED: uncharacterized PPE family protein PPE21-like [Xenopus (Silurana) tropicalis]	NA	sp|Q9BYR4|KRA43_HUMAN/7e-19/Keratin-associated protein 4-3 OS=Homo sapiens GN=KRTAP4-3 PE=2 SV=2	mdo:100022127/7e-10/PER2; period circadian clock 2; K02633 period circadian protein	NA	NA	NA
Unigene47602_All	698	0.15	2.52	4.07039	8.34578e-05	0.000430333	Up	gi|390362249|ref|XP_001190749.2|/1.7063e-09/PREDICTED: serine/threonine-protein phosphatase 6 regulatory ankyrin repeat subunit C-like, partial [Strongylocentrotus purpuratus]	NA	sp|Q8C8R3|ANK2_MOUSE/1e-07/Ankyrin-2 OS=Mus musculus GN=Ank2 PE=1 SV=2	clv:102091167/6e-08/ANK2; ankyrin 2, neuronal; K10380 ankyrin	NA	PS50297/15.433/Ankyrin repeat region circular profile.	NA
Unigene39815_All	591	0.18	3.02	4.06848	8.34578e-05	0.000430591	Up	gi|405978281|gb|EKC42686.1|/3.33437e-65/Tyrosine-protein kinase-like 7 [Crassostrea gigas]	NA	sp|Q8BKG3|PTK7_MOUSE/6e-27/Inactive tyrosine-protein kinase 7 OS=Mus musculus GN=Ptk7 PE=1 SV=1	crg:105317811/8e-66/inactive tyrosine-protein kinase 7-like; K05127 PTK7 protein tyrosine kinase 7 [EC:2.7.10.1]	NA	PS50835/8.629/Ig-like domain profile.	NA
Unigene43773_All	330	0.35	5.86	4.06547	8.34578e-05	0.000430664	Up	NA	NA	NA	NA	NA	NA	NA
Unigene34349_All	377	0.3	5.02	4.06465	8.34578e-05	0.00043048	Up	NA	NA	NA	NA	NA	NA	NA
Unigene18951_All	629	1.34	22.42	4.06448	7.01572e-31	1.65082e-29	Up	gi|260835162|ref|XP_002612578.1|/1.30055e-28/hypothetical protein BRAFLDRAFT_78802 [Branchiostoma floridae] &gt;gi|229297956|gb|EEN68587.1| hypothetical protein BRAFLDRAFT_78802 [Branchiostoma floridae]	NA	sp|Q94490|UBCB_DICDI/3e-22/Ubiquitin conjugating enzyme E2 B OS=Dictyostelium discoideum GN=ubcB PE=1 SV=1	mcc:707831/1e-20/ubiquitin-conjugating enzyme E2 D4-like; K06689 ubiquitin-conjugating enzyme E2 D/E [EC:2.3.2.23]	SPBC119.02/1e-21/---	PF00179/2.6E-36/Ubiquitin-conjugating enzyme	molecular_function:GO:0003824//catalytic activity;GO:0005488//binding;
Unigene42205_All	625	0.17	2.84	4.06228	8.34578e-05	0.000430406	Up	NA	NA	NA	NA	NA	NA	NA
Unigene39347_All	3276	0.54	9.02	4.0621	7.92054e-68	4.17181e-66	Up	gi|405966454|gb|EKC31738.1|/5.47562e-30/hypothetical protein CGI_10008997 [Crassostrea gigas]	NA	sp|Q8N8A2|ANR44_HUMAN/1e-12/Serine/threonine-protein phosphatase 6 regulatory ankyrin repeat subunit B OS=Homo sapiens GN=ANKRD44 PE=1 SV=3	pale:102890109/5e-12/ANKRD44; ankyrin repeat domain 44; K15503 serine/threonine-protein phosphatase 6 regulatory ankyrin repeat subunit B	all2748/6e-12/---	PS50297/29.68/Ankyrin repeat region circular profile.	NA
CL3186.Contig2_All	1302	0.17	2.82	4.05209	3.41608e-09	2.89431e-08	Up	NA	NA	NA	NA	NA	NA	NA
Unigene34286_All	984	0.31	5.14	4.05143	3.75726e-12	3.91894e-11	Up	NA	NA	NA	NA	NA	NA	NA
CL1859.Contig3_All	1211	0.37	6.12	4.04793	7.61544e-18	1.09143e-16	Up	NA	NA	NA	NA	NA	NA	NA
Unigene46035_All	708	0.15	2.48	4.04731	8.34578e-05	0.000430627	Up	gi|405955658|gb|EKC22689.1|/2.16506e-15/hypothetical protein CGI_10001712 [Crassostrea gigas]	NA	NA	NA	NA	NA	NA
Unigene32067_All	1210	0.17	2.81	4.04696	1.21888e-08	9.87484e-08	Up	NA	NA	NA	NA	NA	NA	NA
CL514.Contig2_All	1605	0.25	4.11	4.03914	1.21667e-15	1.55851e-14	Up	gi|443692819|gb|ELT94325.1|/6.5671e-25/hypothetical protein CAPTEDRAFT_217428 [Capitella teleta]	NA	NA	api:100168442/5e-06/uncharacterized LOC100168442; K10314 F-box protein 39	NA	NA	NA
Unigene32671_All	891	1.5	24.66	4.03914	2.06108e-48	7.54245e-47	Up	gi|405978802|gb|EKC43164.1|/7.94834e-33/Multiple epidermal growth factor-like domains 6, partial [Crassostrea gigas]	NA	sp|Q5ND28|SREC_MOUSE/1e-12/Scavenger receptor class F member 1 OS=Mus musculus GN=Scarf1 PE=1 SV=1	crg:105343558/2e-33/receptor-type tyrosine-protein phosphatase S-like; K06776 receptor-type tyrosine-protein phosphatase kappa [EC:3.1.3.48]	NA	PTHR19277:SF91/2.4E-13/--	NA
Unigene33191_All	637	0.17	2.79	4.03666	8.34578e-05	0.000430259	Up	gi|405964468|gb|EKC29950.1|/5.29865e-33/Arylsulfatase B [Crassostrea gigas]	NA	sp|Q5FYB0|ARSJ_HUMAN/4e-21/Arylsulfatase J OS=Homo sapiens GN=ARSJ PE=2 SV=1	xtr:100494972/5e-23/arsj; arylsulfatase family, member J; K12375 arylsulfatase I/J [EC:3.1.6.-]	SMa0943/3e-11/---	PTHR10342:SF206/6.0E-41/--	biological_process:GO:0008152//metabolic process;molecular_function:GO:0008484//sulfuric ester hydrolase activity;
Unigene31931_All	678	0.15	2.45	4.02975	0.000157744	0.000777415	Up	gi|443683522|gb|ELT87749.1|/7.13261e-50/hypothetical protein CAPTEDRAFT_162472 [Capitella teleta]	gi|148234121|ref|NM_001091767.1|/3e-10/Xenopus laevis leukotriene A4 hydrolase (lta4h), mRNA	sp|Q3SZH7|LKHA4_BOVIN/1e-40/Leukotriene A-4 hydrolase OS=Bos taurus GN=LTA4H PE=2 SV=3	crg:105339965/7e-53/leukotriene A-4 hydrolase-like; K01254 leukotriene-A4 hydrolase [EC:3.3.2.6]	XF1488/8e-29/---	PTHR11533/5.9E-59/--	molecular_function:GO:0016787//hydrolase activity;
CL804.Contig2_All	1860	0.58	9.47	4.02924	8.24446e-41	2.53936e-39	Up	gi|333830591|gb|AEG20938.1|/2.15873e-06/rank [Danio rerio]	NA	NA	phi:102100883/5e-06/NGFR; nerve growth factor receptor; K02583 nerve growth factor receptor (TNFR superfamily member 16)	NA	PS50050/9.488/TNFR/NGFR family cysteine-rich region domain profile.	NA
CL850.Contig2_All	918	0.23	3.75	4.02718	2.29758e-08	1.81936e-07	Up	NA	NA	NA	NA	NA	NA	NA
Unigene45790_All	548	0.19	3.09	4.02354	0.000157744	0.000776083	Up	NA	NA	NA	NA	NA	NA	NA
Unigene32348_All	2035	0.19	3.09	4.02354	4.29278e-15	5.34563e-14	Up	gi|405974158|gb|EKC38826.1|/2.9386e-20/hypothetical protein CGI_10026631 [Crassostrea gigas]	NA	NA	NA	NA	NA	NA
Unigene33769_All	610	0.17	2.75	4.01582	0.000157744	0.000776843	Up	NA	NA	NA	NA	NA	NA	NA
Unigene35392_All	552	0.19	3.07	4.01417	0.000157744	0.000776273	Up	gi|405955290|gb|EKC22460.1|/2.64698e-12/Follistatin-related protein 5 [Crassostrea gigas]	gi|333398980|gb|JF750938.1|/3e-16/Acipenser schrenckii clone HLJSX226 microsatellite sequence	sp|Q75JC9|Y8484_DICDI/5e-09/Uncharacterized protein DDB_G0271670 OS=Dictyostelium discoideum GN=DDB_G0271670 PE=4 SV=1	lcm:102363180/4e-08/HMGB2; high mobility group box 2; K11295 high mobility group protein B2	XF1267/4e-08/---	NA	NA
Unigene20497_All	404	0.27	4.36	4.0133	0.000157744	0.0007764	Up	gi|405957448|gb|EKC23656.1|/1.66989e-52/Serine/threonine-protein kinase ULK4 [Crassostrea gigas]	NA	sp|Q3V129|ULK4_MOUSE/4e-37/Serine/threonine-protein kinase ULK4 OS=Mus musculus GN=Ulk4 PE=2 SV=2	crg:105343229/3e-53/serine/threonine-protein kinase ULK4-like; K17545 serine/threonine-protein kinase ULK4 [EC:2.7.11.1]	NA	PTHR22983/3.0E-44/--	NA
CL670.Contig1_All	1149	0.53	8.55	4.01186	1.37515e-22	2.42919e-21	Up	gi|405974713|gb|EKC39338.1|/1.06755e-73/Heat shock 70 kDa protein 12A [Crassostrea gigas]	NA	sp|O43301|HS12A_HUMAN/1e-36/Heat shock 70 kDa protein 12A OS=Homo sapiens GN=HSPA12A PE=1 SV=2	aqu:100633272/8e-16/uncharacterized LOC100633272; K10380 ankyrin	NA	PTHR14187:SF5/6.3E-40/--	NA
Unigene37363_All	466	0.23	3.71	4.01171	0.000157744	0.00077564	Up	NA	NA	NA	NA	NA	NA	NA
Unigene35256_All	612	0.17	2.74	4.01057	0.000157744	0.000777034	Up	gi|556101489|gb|ESO90141.1|/1.1235e-74/hypothetical protein LOTGIDRAFT_123879, partial [Lottia gigantea]	NA	sp|Q7ZZC8|NEK9_XENLA/3e-56/Serine/threonine-protein kinase Nek9 OS=Xenopus laevis GN=nek9 PE=2 SV=1	crg:105325375/3e-67/serine/threonine-protein kinase Nek9-like; K08857 NIMA (never in mitosis gene a)-related kinase [EC:2.7.11.1]	ECU04g1500/2e-14/---	PS50012/8.695/Regulator of chromosome condensation (RCC1) repeat profile.	NA
Unigene39525_All	612	0.17	2.74	4.01057	0.000157744	0.00077678	Up	gi|405949951|gb|EKC17961.1|/1.30953e-06/Forkhead box protein L1 [Crassostrea gigas]	NA	NA	crg:105321094/3e-07/forkhead box protein C1-like; K09405 forkhead box protein L	NA	NA	NA
Unigene36817_All	463	0.71	11.43	4.00886	7.06812e-12	7.25062e-11	Up	gi|449275689|gb|EMC84458.1|/5.16545e-08/hypothetical protein A306_07262, partial [Columba livia]	NA	NA	NA	NA	NA	NA
Unigene35019_All	958	0.21	3.38	4.00856	4.32448e-08	3.32994e-07	Up	gi|260804213|ref|XP_002596983.1|/2.35762e-33/hypothetical protein BRAFLDRAFT_76482 [Branchiostoma floridae] &gt;gi|229282244|gb|EEN52995.1| hypothetical protein BRAFLDRAFT_76482 [Branchiostoma floridae]	NA	NA	bfo:BRAFLDRAFT_81965/8e-11/hypothetical protein; K00699 glucuronosyltransferase [EC:2.4.1.17]	Rv3701c/8e-21/---	PF10017/1.2E-26/Histidine-specific methyltransferase, SAM-dependent	NA
Unigene36850_All	419	0.26	4.18	4.00692	0.000157744	0.000776336	Up	NA	NA	NA	NA	NA	NA	NA
CL665.Contig2_All	997	0.27	4.34	4.00666	7.30638e-11	7.01869e-10	Up	NA	gi|315076103|gb|HQ593147.1|/7e-15/Argopecten irradians clone AICL115 microsatellite sequence	NA	NA	NA	NA	NA
CL1848.Contig2_All	991	2.09	33.58	4.00603	8.498e-73	4.82124e-71	Up	NA	NA	NA	NA	NA	NA	NA
Unigene41592_All	613	0.17	2.73	4.00529	0.000157744	0.000776526	Up	gi|405950032|gb|EKC18040.1|/1.01394e-35/BTB/POZ domain-containing protein 2 [Crassostrea gigas]	NA	sp|Q2LE78|BTBD6_XENLA/2e-22/BTB/POZ domain-containing protein 6 OS=Xenopus laevis GN=btbd6 PE=1 SV=1	crg:105318636/1e-30/BTB/POZ domain-containing protein 6-like; K10478 BTB/POZ domain-containing protein 3/6	NA	PTHR24413/2.5E-46/--	NA
CL1282.Contig1_All	1143	0.35	5.62	4.00514	4.29278e-15	5.34784e-14	Up	gi|407907629|gb|AFU48617.1|/2.47636e-06/toll-like receptor i [Mytilus galloprovincialis]	NA	sp|Q9NR97|TLR8_HUMAN/7e-06/Toll-like receptor 8 OS=Homo sapiens GN=TLR8 PE=1 SV=1	crg:105317763/7e-20/protein toll-like; K18809 protein toll	NA	PF01582/1.6E-10/TIR domain	NA
Unigene38652_All	1620	0.37	5.92	4	2.5812e-22	4.50425e-21	Up	gi|405951567|gb|EKC19468.1|/8.00914e-47/Phosphatidylglycerol/phosphatidylinositol transfer protein [Crassostrea gigas]	NA	NA	NA	NA	PF02221/2.2E-7/ML domain	NA
Unigene45913_All	211	0.6	9.6	4	0.000157744	0.000776653	Up	NA	NA	NA	NA	NA	NA	NA
CL1547.Contig3_All	1075	0.38	6.08	4	2.2863e-15	2.88698e-14	Up	NA	NA	NA	NA	NA	NA	NA
CL1140.Contig2_All	1645	0.59	9.43	3.99847	5.53936e-36	1.50821e-34	Up	gi|405958978|gb|EKC25056.1|/4.10978e-115/RING finger protein 32 [Crassostrea gigas]	gi|524874567|ref|XM_005093962.1|/2e-07/PREDICTED: Aplysia californica RING finger protein 32-like (LOC101858092), mRNA	sp|Q9JIT1|RNF32_MOUSE/3e-88/RING finger protein 32 OS=Mus musculus GN=Rnf32 PE=2 SV=1	rno:303963/1e-06/Dzip3, RGD1563278; DAZ interacting zinc finger protein 3; K10642 E3 ubiquitin-protein ligase DZIP3 [EC:2.3.2.27]	NA	PS50089/12.711/Zinc finger RING-type profile.	NA
CL2501.Contig1_All	452	0.24	3.83	3.99624	0.000157744	0.000777224	Up	NA	NA	NA	NA	NA	NA	NA
Unigene42906_All	740	0.14	2.23	3.99354	0.000157744	0.000777351	Up	gi|405964045|gb|EKC29567.1|/5.22672e-132/Dual specificity tyrosine-phosphorylation-regulated kinase 4 [Crassostrea gigas]	gi|390370621|ref|XM_789564.3|/1e-09/PREDICTED: Strongylocentrotus purpuratus dual specificity tyrosine-phosphorylation-regulated kinase 4-like (LOC589936), partial mRNA	sp|Q8BI55|DYRK4_MOUSE/1e-91/Dual specificity tyrosine-phosphorylation-regulated kinase 4 OS=Mus musculus GN=Dyrk4 PE=2 SV=1	crg:105323221/1e-132/dual specificity tyrosine-phosphorylation-regulated kinase 4-like; K18669 dual specificity tyrosine-phosphorylation-regulated kinase 2/3/4 [EC:2.7.12.1]	YBL016w/9e-11/---	PS00108/-/Serine/Threonine protein kinases active-site signature.	NA
Unigene47578_All	738	0.14	2.23	3.99354	0.000157744	0.000776146	Up	NA	NA	NA	NA	NA	NA	NA
Unigene39229_All	409	0.27	4.3	3.99331	0.000157744	0.00077621	Up	gi|260804463|ref|XP_002597107.1|/2.67041e-26/hypothetical protein BRAFLDRAFT_76362 [Branchiostoma floridae] &gt;gi|229282370|gb|EEN53119.1| hypothetical protein BRAFLDRAFT_76362 [Branchiostoma floridae]	NA	NA	NA	NA	NA	NA
CL2669.Contig1_All	829	1	15.9	3.99095	3.07698e-29	6.90095e-28	Up	NA	NA	NA	NA	NA	NA	NA
CL330.Contig3_All	796	2.04	32.39	3.98891	3.982e-56	1.70923e-54	Up	gi|405950453|gb|EKC18441.1|/1.47701e-45/hypothetical protein CGI_10012416 [Crassostrea gigas]	NA	NA	NA	NA	NA	NA
Unigene46832_All	796	0.26	4.12	3.98606	4.32448e-08	3.33036e-07	Up	NA	NA	NA	NA	NA	NA	NA
Unigene19376_All	2737	1.26	19.95	3.98489	6.18538e-122	5.99723e-120	Up	gi|405950821|gb|EKC18783.1|/2.99758e-26/hypothetical protein CGI_10011047 [Crassostrea gigas]	NA	sp|Q9EQ32|BCAP_MOUSE/2e-07/Phosphoinositide 3-kinase adapter protein 1 OS=Mus musculus GN=Pik3ap1 PE=1 SV=1	cmk:103185842/6e-09/pik3ap1; phosphoinositide-3-kinase adaptor protein 1; K12230 phosphoinositide 3-kinase adapter protein 1	NA	PS51376/9.035/DBB domain profile.	NA
CL389.Contig2_All	368	0.25	3.95	3.98185	0.00013138	0.00065726	Up	NA	NA	NA	NA	NA	NA	NA
CL3248.Contig3_All	768	0.67	10.58	3.98103	3.12692e-19	4.78625e-18	Up	NA	gi|345105464|gb|HQ225744.1|/5e-06/Argopecten irradians programmed cell death 4 (PDCD4) mRNA, complete cds	NA	NA	NA	NA	NA
Unigene47247_All	475	0.23	3.63	3.98026	0.000157744	0.000776907	Up	NA	NA	NA	NA	NA	NA	NA
Unigene47476_All	475	0.23	3.63	3.98026	0.000157744	0.000775577	Up	gi|240981045|ref|XP_002403605.1|/3.50575e-31/SET and MYND domain-containing protein (SMYD), putative [Ixodes scapularis] &gt;gi|215491387|gb|EEC01028.1| SET and MYND domain-containing protein (SMYD), putative [Ixodes scapularis]	NA	sp|Q8BTK5|SMYD4_MOUSE/2e-20/SET and MYND domain-containing protein 4 OS=Mus musculus GN=Smyd4 PE=2 SV=2	mdo:100619798/1e-11/SMYD3; SET and MYND domain containing 3; K11426 SET and MYND domain-containing protein	NA	PTHR12197:SF145/3.9E-35/--	NA
Unigene6153_All	2664	1.41	22.23	3.97874	5.64008e-132	6.0416e-130	Up	NA	NA	NA	NA	NA	NA	NA
Unigene43593_All	625	0.17	2.68	3.97863	0.000157744	0.000775514	Up	gi|405964550|gb|EKC30021.1|/1.13555e-61/Multiple PDZ domain protein [Crassostrea gigas]	gi|195061167|ref|XM_001995903.1|/3e-19/Drosophila grimshawi GH14093 (Dgri\GH14093), mRNA	sp|O55164|MPDZ_RAT/3e-36/Multiple PDZ domain protein OS=Rattus norvegicus GN=Mpdz PE=1 SV=1	crg:105348307/3e-62/multiple PDZ domain protein-like; K06095 multiple PDZ domain protein	YDR145w/1e-06/---	PS50106/18.878/PDZ domain profile.	NA
Unigene39930_All	516	0.21	3.31	3.97837	0.000157744	0.00077697	Up	gi|504132662|ref|XP_004578942.1|/1.45158e-16/PREDICTED: cubilin [Ochotona princeps]	NA	sp|Q9TU53|CUBN_CANFA/1e-17/Cubilin OS=Canis familiaris GN=CUBN PE=1 SV=1	ngi:103734829/6e-17/Cubn; cubilin (intrinsic factor-cobalamin receptor); K14616 cubilin	NA	PS01180/15.299/CUB domain profile.	cellular_component:GO:0012505//endomembrane system;GO:0043231//intracellular membrane-bounded organelle;GO:0044425//membrane part;GO:0045177//apical part of cell;GO:0044444//cytoplasmic part;
Unigene35709_All	515	0.21	3.31	3.97837	0.000157744	0.00077659	Up	gi|405977593|gb|EKC42036.1|/2.83294e-12/Phosphoinositide 3-kinase adapter protein 1 [Crassostrea gigas]	NA	NA	crg:105348516/9e-13/phosphoinositide 3-kinase adapter protein 1-like; K12230 phosphoinositide 3-kinase adapter protein 1	NA	NA	NA
Unigene33051_All	441	0.25	3.94	3.9782	0.000157744	0.00077583	Up	NA	NA	NA	NA	NA	NA	NA
Unigene34246_All	539	0.2	3.15	3.97728	0.000157744	0.000775703	Up	gi|115676915|ref|XP_781742.2|/5.38461e-23/PREDICTED: ribonuclease P protein subunit p38-like [Strongylocentrotus purpuratus]	NA	sp|P78345|RPP38_HUMAN/7e-18/Ribonuclease P protein subunit p38 OS=Homo sapiens GN=RPP38 PE=1 SV=2	spu:576331/1e-23/ribonuclease P protein subunit p38; K14523 ribonucleases P/MRP protein subunit RPP38 [EC:3.1.26.5]	NA	PTHR21596:SF10/1.1E-24/--	NA
CL4832.Contig3_All	6198	0.23	3.62	3.97628	7.36316e-52	2.93883e-50	Up	gi|405950979|gb|EKC18930.1|/3.26013e-58/Macrophage colony-stimulating factor 1 receptor 2 [Crassostrea gigas]	NA	sp|P42689|SRK3_SPOLA/4e-20/Tyrosine-protein kinase SRK3 (Fragment) OS=Spongilla lacustris GN=SRK3 PE=2 SV=1	crg:105341914/1e-18/tyrosine-protein kinase Yes-like; K05705 tyrosine-protein kinase Yes [EC:2.7.10.2]	L138452_1/2e-09/---	PTHR24418/4.4E-28/--	NA
Unigene40726_All	593	0.18	2.83	3.97473	0.000157744	0.000775893	Up	gi|556095190|gb|ESO83843.1|/1.20255e-14/hypothetical protein LOTGIDRAFT_236369 [Lottia gigantea]	NA	NA	NA	NA	NA	NA
Unigene44774_All	367	0.31	4.87	3.97358	0.000157744	0.000777161	Up	NA	NA	NA	NA	NA	NA	NA
CL1548.Contig1_All	2294	0.67	10.49	3.96871	1.74233e-54	7.30206e-53	Up	gi|405950586|gb|EKC18564.1|/1.91559e-39/hypothetical protein CGI_10011811 [Crassostrea gigas]	NA	NA	NA	NA	NA	NA
Unigene46036_All	430	0.26	4.06	3.9649	0.000157744	0.000777288	Up	NA	NA	NA	NA	NA	NA	NA
Unigene47329_All	445	0.25	3.9	3.96347	0.000157744	0.000776717	Up	NA	NA	NA	NA	NA	NA	NA
Unigene33766_All	1362	0.3	4.68	3.96347	4.29278e-15	5.34674e-14	Up	gi|260793834|ref|XP_002591915.1|/4.47583e-101/hypothetical protein BRAFLDRAFT_269073 [Branchiostoma floridae] &gt;gi|229277128|gb|EEN47926.1| hypothetical protein BRAFLDRAFT_269073 [Branchiostoma floridae]	gi|514450153|ref|XM_003464101.2|/2e-09/PREDICTED: Cavia porcellus endo/exonuclease (5'-3'), endonuclease G-like (Exog), mRNA	sp|Q0IH72|EXOG_XENLA/2e-92/Nuclease EXOG, mitochondrial OS=Xenopus laevis GN=exog PE=2 SV=1	xla:779295/2e-91/exog, endogl1; endo/exonuclease (5'-3'), endonuclease G-like (EC:3.1.30.-); K15050 nuclease EXOG, mitochondrial	YJL208c/2e-46/---	SM00477/4.9E-81/DNA/RNA non-specific endonuclease	cellular_component:GO:0016020//membrane;molecular_function:GO:0016787//hydrolase activity;GO:0005488//binding;
Unigene8912_All	2839	0.94	14.66	3.96308	4.596e-93	3.31154e-91	Up	gi|405964173|gb|EKC29690.1|/2.79905e-67/Neuronal acetylcholine receptor subunit beta-3 [Crassostrea gigas]	NA	sp|Q27218|ACH7_CAEEL/1e-39/Acetylcholine receptor subunit beta-type lev-1 OS=Caenorhabditis elegans GN=lev-1 PE=1 SV=1	crg:105330350/3e-73/neuronal acetylcholine receptor subunit alpha-6-like; K04808 nicotinic acetylcholine receptor alpha-6	NA	PR00252/1.36E-9/Neurotransmitter-gated ion channel family signature	NA
Unigene39708_All	431	0.26	4.05	3.96134	0.000157744	0.000775956	Up	NA	NA	NA	NA	NA	NA	NA
Unigene11635_All	1327	1.36	21.17	3.96034	8.0593e-62	3.86667e-60	Up	gi|556107453|gb|ESO96105.1|/1.3214e-41/hypothetical protein LOTGIDRAFT_150043 [Lottia gigantea]	NA	sp|P29241|NADA_APLCA/2e-41/ADP-ribosyl cyclase/cyclic ADP-ribose hydrolase OS=Aplysia californica PE=1 SV=1	crg:105319809/6e-48/ADP-ribosyl cyclase/cyclic ADP-ribose hydrolase-like; K18152 ADP-ribosyl cyclase 2 [EC:3.2.2.6 2.4.99.20]	NA	PF02267/1.6E-62/ADP-ribosyl cyclase	NA
Unigene33064_All	599	0.18	2.8	3.95936	0.000157744	0.00077602	Up	gi|557157395|emb|CDJ56347.1|/3.25907e-15/hypothetical protein EMWEY_00052780 [Eimeria maxima]	NA	sp|A2VD23|STM_DANRE/5e-12/Protein starmaker OS=Danio rerio GN=stm PE=2 SV=1	mze:101486822/4e-13/X-linked retinitis pigmentosa GTPase regulator-like; K19607 X-linked retinitis pigmentosa GTPase regulator	SPAC140.02/1e-08/---	NA	NA
Unigene35127_All	1091	0.19	2.95	3.95664	4.32448e-08	3.33079e-07	Up	gi|405961671|gb|EKC27436.1|/5.06849e-46/hypothetical protein CGI_10025427 [Crassostrea gigas]	NA	sp|Q5JXM2|MET24_HUMAN/4e-15/Methyltransferase-like protein 24 OS=Homo sapiens GN=METTL24 PE=2 SV=1	bfo:BRAFLDRAFT_125902/6e-10/hypothetical protein; K12816 pre-mRNA-processing factor 17	NA	PTHR32026/5.1E-38/--	NA
Unigene31713_All	634	0.33	5.1	3.94996	8.1266e-08	6.0897e-07	Up	NA	NA	NA	NA	NA	NA	NA
CL562.Contig1_All	930	0.42	6.48	3.94753	1.22101e-14	1.48162e-13	Up	NA	NA	NA	NA	NA	NA	NA
CL4918.Contig1_All	780	0.33	5.09	3.94713	9.52514e-10	8.42661e-09	Up	gi|308507521|ref|XP_003115944.1|/2.01585e-23/hypothetical protein CRE_08673 [Caenorhabditis remanei] &gt;gi|308250888|gb|EFO94840.1| hypothetical protein CRE_08673 [Caenorhabditis remanei]	NA	sp|Q9NBX4|RTXE_DROME/5e-12/Probable RNA-directed DNA polymerase from transposon X-element OS=Drosophila melanogaster GN=X-element\ORF2 PE=3 SV=1	aqu:100633263/6e-23/uncharacterized LOC100633263; K00306 sarcosine oxidase / L-pipecolate oxidase [EC:1.5.3.1 1.5.3.7]	NA	PS50878/10.27/Reverse transcriptase (RT) catalytic domain profile.	NA
CL4228.Contig2_All	1360	0.22	3.39	3.94571	5.51844e-12	5.69094e-11	Up	NA	gi|83999705|emb|CT010444.10|/4e-08/Mouse DNA sequence from clone RP23-151L20 on chromosome 12, complete sequence	NA	NA	NA	NA	NA
Unigene24404_All	215	1.18	18.16	3.94391	8.1266e-08	6.09046e-07	Up	NA	NA	NA	NA	NA	NA	NA
CL4017.Contig1_All	3385	1.27	19.53	3.94279	2.9715e-147	3.55566e-145	Up	gi|405974734|gb|EKC39358.1|/0/Plectin-1 [Crassostrea gigas]	NA	sp|E9Q557|DESP_MOUSE/4e-17/Desmoplakin OS=Mus musculus GN=Dsp PE=1 SV=1	crg:105327339/2e-68/microtubule-actin cross-linking factor 1, isoforms 1/2/3/5-like; K10382 dystonin	NA	PTHR23169/6.5E-13/--	NA
Unigene32798_All	401	1.11	17.03	3.93945	1.50949e-14	1.82141e-13	Up	gi|557175858|emb|CDJ29532.1|/1.09775e-08/hypothetical protein EMH_0050470 [Eimeria mitis]	NA	NA	clv:102094752/8e-06/uncharacterized LOC102094752; K09567 peptidyl-prolyl isomerase H (cyclophilin H) [EC:5.2.1.8]	NA	NA	NA
Unigene4346_All	3661	2.01	30.74	3.93485	1.75335e-248	3.88753e-246	Up	gi|405962491|gb|EKC28161.1|/0/L-ascorbate oxidase [Crassostrea gigas]	gi|323510943|gb|HQ225752.1|/3e-20/Argopecten irradians clone AiDD105 microsatellite sequence	NA	aqu:100635277/4e-24/uncharacterized LOC100635277; K11989 indian hedgehog	YMR058w/6e-37/---	PTHR11709:SF33/2.6E-155/--	NA
CL604.Contig3_All	2786	0.51	7.75	3.92563	7.41212e-49	2.75762e-47	Up	gi|405969780|gb|EKC34731.1|/0/Far upstream element-binding protein 3 [Crassostrea gigas]	gi|532003929|ref|XM_005346100.1|/8e-11/PREDICTED: Microtus ochrogaster far upstream element (FUSE) binding protein 3 (Fubp3), transcript variant X2, mRNA	sp|Q96AE4|FUBP1_HUMAN/4e-128/Far upstream element-binding protein 1 OS=Homo sapiens GN=FUBP1 PE=1 SV=3	crg:105324686/0.0/far upstream element-binding protein 1-like; K13210 far upstream element-binding protein	XF0818/3e-12/---	PTHR10288:SF145/5.9E-164/--	NA
Unigene32396_All	1130	0.27	4.09	3.92107	4.67468e-11	4.56256e-10	Up	gi|405976657|gb|EKC41156.1|/5.79632e-08/Hemicentin-1 [Crassostrea gigas]	NA	NA	ola:101168333/2e-06/titin-like; K12567 titin [EC:2.7.11.1]	NA	SM00060/2.6E-6/Fibronectin type 3 domain	NA
Unigene15530_All	1353	2.38	36.05	3.92097	1.22856e-105	1.03336e-103	Up	NA	gi|222355231|gb|FJ014707.1|/1e-07/Argopecten irradians cytoplasmic copper/zinc superoxide dismutase gene, complete cds	NA	NA	NA	NA	NA
Unigene35272_All	1375	0.22	3.33	3.91995	4.67468e-11	4.56108e-10	Up	gi|405973428|gb|EKC38145.1|/5.90132e-08/hypothetical protein CGI_10019310 [Crassostrea gigas]	NA	NA	NA	NA	PS50158/9.504/Zinc finger CCHC-type profile.	NA
CL275.Contig4_All	483	0.78	11.8	3.91917	5.61012e-13	6.16163e-12	Up	gi|295293387|gb|ADF87943.1|/1.12473e-11/C-type lectin 5 [Azumapecten farreri]	NA	sp|Q7T045|SLLC1_MACLB/3e-07/Snaclec coagulation factor X-activating enzyme light chain 1 OS=Macrovipera lebetina GN=LC1 PE=1 SV=1	crg:105346041/9e-08/galactose-specific lectin nattectin-like; K06561 CD207 antigen	NA	PTHR22801/1.2E-14/--	biological_process:GO:0048731//system development;
CL243.Contig2_All	815	0.22	3.3	3.90689	2.4775e-07	1.77471e-06	Up	NA	NA	NA	NA	NA	NA	NA
CL1395.Contig1_All	1594	0.32	4.79	3.90388	9.3999e-18	1.34143e-16	Up	NA	gi|348020200|gb|JN703459.1|/7e-07/Chlamys farreri clone BAC Bam040H03, complete sequence	NA	NA	NA	NA	NA
CL2286.Contig2_All	539	0.28	4.18	3.9	6.3916e-06	3.88338e-05	Up	NA	NA	NA	NA	NA	NA	NA
CL468.Contig1_All	2377	0.26	3.88	3.89947	1.70112e-21	2.86408e-20	Up	gi|405972490|gb|EKC37256.1|/1.08356e-85/Mediator of RNA polymerase II transcription subunit 25 [Crassostrea gigas]	gi|66828622|ref|XM_642573.1|/2e-20/Dictyostelium discoideum AX4 adenylyl cyclase (acrA) mRNA, complete cds	sp|Q6GP15|MED25_XENLA/3e-56/Mediator of RNA polymerase II transcription subunit 25 OS=Xenopus laevis GN=med25 PE=2 SV=1	crg:105342475/2e-93/mediator of RNA polymerase II transcription subunit 25-like; K15168 mediator of RNA polymerase II transcription subunit 25	YBR112c/5e-15/---	PTHR12433:SF11/8.5E-61/--	NA
CL1978.Contig3_All	808	0.25	3.73	3.89918	3.47136e-08	2.69608e-07	Up	NA	NA	NA	NA	NA	NA	NA
Unigene16130_All	3054	0.84	12.46	3.89077	3.42624e-84	2.23383e-82	Up	gi|395740045|ref|XP_003777356.1|/3.77091e-09/PREDICTED: uncharacterized protein LOC100938603 [Pongo abelii]	NA	NA	NA	NA	NA	NA
Unigene31500_All	699	0.3	4.44	3.88753	1.52461e-07	1.11288e-06	Up	gi|405974608|gb|EKC39239.1|/1.21434e-31/Ankyrin-1 [Crassostrea gigas]	NA	sp|O75179|ANR17_HUMAN/2e-23/Ankyrin repeat domain-containing protein 17 OS=Homo sapiens GN=ANKRD17 PE=1 SV=3	aqu:105316376/2e-28/transient receptor potential cation channel subfamily A member 1 homolog; K04984 transient receptor potential cation channel subfamily A member 1	all2748/2e-21/---	NA	NA
Unigene46404_All	1182	0.51	7.54	3.886	3.89284e-20	6.19118e-19	Up	gi|405967062|gb|EKC32275.1|/1.61852e-56/Sulfotransferase family cytosolic 1B member 1 [Crassostrea gigas]	NA	sp|Q95JD5|ST1B1_CANFA/9e-39/Sulfotransferase family cytosolic 1B member 1 OS=Canis familiaris GN=SULT1B1 PE=1 SV=1	crg:105343439/3e-57/sulfotransferase family cytosolic 1B member 1-like; K01025	NA	PF00685/2.2E-44/Sulfotransferase domain	NA
Unigene33015_All	994	0.31	4.57	3.88185	8.75434e-11	8.3511e-10	Up	gi|290986729|ref|XP_002676076.1|/7.30361e-09/predicted protein [Naegleria gruberi] &gt;gi|284089676|gb|EFC43332.1| predicted protein [Naegleria gruberi]	NA	sp|Q9U7E0|ATRX_CAEEL/1e-08/Transcriptional regulator ATRX homolog OS=Caenorhabditis elegans GN=xnp-1 PE=1 SV=1	tca:100142567/5e-08/serine/arginine repetitive matrix protein 1; K13171 serine/arginine repetitive matrix protein 1	NA	NA	NA
Unigene40866_All	594	0.36	5.3	3.87992	1.52461e-07	1.11301e-06	Up	NA	NA	NA	NA	NA	NA	NA
CL4674.Contig2_All	691	5.9	86.5	3.87391	1.18498e-122	1.16391e-120	Up	gi|555704324|gb|ESO07557.1|/1.18576e-07/hypothetical protein HELRODRAFT_170101 [Helobdella robusta]	NA	NA	dse:Dsec_GM15849/1e-06/GM15849 gene product from transcript GM15849-RA; K03959 NADH dehydrogenase (ubiquinone) 1 beta subcomplex subunit 3	NA	PF08122/2.2E-6/NADH-ubiquinone oxidoreductase B12 subunit family	NA
CL234.Contig1_All	1458	0.27	3.95	3.87082	1.84592e-13	2.08784e-12	Up	gi|405968105|gb|EKC33205.1|/1.19305e-38/Receptor-type tyrosine-protein phosphatase T [Crassostrea gigas]	NA	sp|Q14162|SREC_HUMAN/2e-23/Scavenger receptor class F member 1 OS=Homo sapiens GN=SCARF1 PE=1 SV=3	crg:105345728/9e-42/receptor-type tyrosine-protein phosphatase epsilon-like; K18032 receptor-type tyrosine-protein phosphatase A [EC:3.1.3.48]	NA	PF00754/1.5E-6/F5/8 type C domain	NA
CL1625.Contig1_All	510	0.63	9.21	3.86978	1.6374e-10	1.53336e-09	Up	NA	NA	NA	NA	NA	NA	NA
CL849.Contig2_All	524	0.82	11.98	3.86886	9.88548e-14	1.13665e-12	Up	NA	NA	NA	NA	NA	NA	NA
CL2654.Contig2_All	1471	0.17	2.47	3.8609	3.41608e-09	2.8935e-08	Up	gi|123469906|ref|XP_001318162.1|/4.91141e-32/viral A-type inclusion protein [Trichomonas vaginalis G3]	NA	sp|Q9PTD7|CING_XENLA/2e-23/Cingulin OS=Xenopus laevis GN=cgn PE=1 SV=2	lcm:102361133/3e-25/CLIP1; CAP-GLY domain containing linker protein 1; K10421 CAP-Gly domain-containing linker protein 1	MK0690/1e-17/---	NA	NA
CL174.Contig2_All	10372	0.25	3.63	3.85997	3.42624e-84	2.23142e-82	Up	gi|442624002|ref|NP_001261043.1|/4.97883e-65/muscleblind, isoform O [Drosophila melanogaster] &gt;gi|440214470|gb|AGB93575.1| mbl, isoform O [Drosophila melanogaster]	NA	sp|O16011|MBL_DROME/7e-42/Protein muscleblind OS=Drosophila melanogaster GN=mbl PE=2 SV=2	crg:105330717/4e-61/muscleblind-like protein 2a; K14943 muscleblind	NA	PTHR12675/2.2E-59/--	biological_process:GO:0000381//regulation of alternative mRNA splicing, via spliceosome;GO:0007517//muscle organ development;GO:0006915//apoptotic process;GO:0046716//muscle cell cellular homeostasis;GO:0007476//imaginal disc-derived wing morphogenesis;GO:0045924//regulation of female receptivity;GO:0042052//rhabdomere development;cellular_component:GO:0005634//nucleus;GO:0031673//H zone;GO:00484…
Unigene37227_All	1595	0.5	7.26	3.85997	5.63854e-26	1.13161e-24	Up	gi|261289819|ref|XP_002611771.1|/5.13854e-30/hypothetical protein BRAFLDRAFT_128896 [Branchiostoma floridae] &gt;gi|229297143|gb|EEN67781.1| hypothetical protein BRAFLDRAFT_128896 [Branchiostoma floridae]	NA	NA	NA	NA	PF03492/5.6E-25/SAM dependent carboxyl methyltransferase	NA
Unigene44393_All	559	0.38	5.48	3.8501	2.8552e-07	2.02841e-06	Up	NA	NA	NA	NA	NA	NA	NA
CL668.Contig4_All	3257	0.1	1.44	3.848	1.32823e-11	1.33951e-10	Up	gi|405970214|gb|EKC35142.1|/3.52093e-146/Ataxin-2 [Crassostrea gigas]	NA	sp|Q8WWM7|ATX2L_HUMAN/8e-60/Ataxin-2-like protein OS=Homo sapiens GN=ATXN2L PE=1 SV=2	api:100165557/2e-20/trithorax group protein osa-like; K11653 AT-rich interactive domain-containing protein 1	SPBC21B10.03c/2e-16/---	PTHR12854/3.3E-64/--	NA
Unigene40678_All	552	0.39	5.56	3.83354	2.8552e-07	2.02888e-06	Up	NA	NA	NA	NA	NA	NA	NA
CL674.Contig4_All	1704	0.88	12.51	3.82943	1.31404e-46	4.59671e-45	Up	gi|556098932|gb|ESO87584.1|/3.22869e-86/hypothetical protein LOTGIDRAFT_166465 [Lottia gigantea]	NA	sp|Q9XWD6|CED1_CAEEL/3e-54/Cell death abnormality protein 1 OS=Caenorhabditis elegans GN=ced-1 PE=1 SV=1	crg:105333895/8e-66/uncharacterized LOC105333895; K18032 receptor-type tyrosine-protein phosphatase A [EC:3.1.3.48]	NA	PTHR24035/1.4E-20/--	NA
CL335.Contig6_All	2181	1.16	16.48	3.82852	2.5674e-78	1.57995e-76	Up	gi|294942182|ref|XP_002783417.1|/6.27681e-08/glycoprotein X precursor, putative [Perkinsus marinus ATCC 50983] &gt;gi|239895872|gb|EER15213.1| glycoprotein X precursor, putative [Perkinsus marinus ATCC 50983]	NA	sp|Q05049|MUC1_XENLA/6e-06/Integumentary mucin C.1 (Fragment) OS=Xenopus laevis PE=2 SV=1	asn:102388355/1e-06/mucin-2-like; K10955 intestinal mucin-2	NA	NA	NA
CL873.Contig2_All	1620	0.2	2.84	3.82782	4.67468e-11	4.56182e-10	Up	gi|405975752|gb|EKC40300.1|/9.86087e-29/hypothetical protein CGI_10023735 [Crassostrea gigas]	gi|348020200|gb|JN703459.1|/3e-06/Chlamys farreri clone BAC Bam040H03, complete sequence	NA	NA	NA	NA	NA
Unigene45458_All	290	1.22	17.32	3.82749	3.0586e-10	2.79609e-09	Up	gi|556096331|gb|ESO84983.1|/2.33973e-06/hypothetical protein LOTGIDRAFT_89004, partial [Lottia gigantea]	NA	NA	NA	NA	NA	NA
CL4461.Contig1_All	1489	0.47	6.66	3.82479	3.02152e-22	5.24984e-21	Up	gi|405950280|gb|EKC18277.1|/3.12776e-26/hypothetical protein CGI_10013876 [Crassostrea gigas]	NA	NA	crg:105342254/2e-08/uncharacterized LOC105342254; K11997 tripartite motif-containing protein 2/3	NA	NA	NA
Unigene45273_All	869	0.24	3.4	3.82443	2.8552e-07	2.02865e-06	Up	gi|71895931|ref|NP_001026718.1|/4.52965e-70/methylthioribulose-1-phosphate dehydratase [Gallus gallus] &gt;gi|82082630|sp|Q5ZLP2.1|MTNB_CHICK RecName: Full=Methylthioribulose-1-phosphate dehydratase; Short=MTRu-1-P dehydratase; AltName: Full=APAF1-interacting protein homolog	NA	sp|Q5ZLP2|MTNB_CHICK/9e-72/Methylthioribulose-1-phosphate dehydratase OS=Gallus gallus GN=APIP PE=2 SV=1	gga:428860/9e-71/APIP; APAF1 interacting protein (EC:4.2.1.109); K08964 methylthioribulose-1-phosphate dehydratase [EC:4.2.1.109]	YJR024c/2e-40/---	SM01007/9.1E-33/Class II Aldolase and Adducin N-terminal domain	biological_process:GO:0050794//regulation of cellular process;GO:0019509//L-methionine salvage from methylthioadenosine;GO:0006915//apoptotic process;molecular_function:GO:0046872//metal ion binding;GO:0016829//lyase activity;
Unigene33550_All	1140	0.18	2.55	3.82443	2.8552e-07	2.02817e-06	Up	gi|405950758|gb|EKC18724.1|/1.49806e-128/cAMP-dependent protein kinase type II regulatory subunit [Crassostrea gigas]	gi|597786684|ref|XM_007256738.1|/8e-06/PREDICTED: Astyanax mexicanus cAMP-dependent protein kinase type II-alpha regulatory subunit-like (LOC103030071), mRNA	sp|Q26619|KAPR_STRPU/6e-85/cAMP-dependent protein kinase type II regulatory subunit OS=Strongylocentrotus purpuratus PE=2 SV=1	spu:373288/7e-84/cyclic AMP-dependent protein kinase type II regulatory subunit; K04739 cAMP-dependent protein kinase regulator	YIL033c/4e-39/---	SM00394/1.0E-8/RIIalpha, Regulatory subunit portion of type II PKA R-subunit	NA
CL485.Contig4_All	1546	0.18	2.55	3.82443	5.02084e-10	4.52138e-09	Up	gi|405978740|gb|EKC43104.1|/2.20659e-38/hypothetical protein CGI_10022307 [Crassostrea gigas]	NA	NA	NA	NA	NA	NA
CL2255.Contig3_All	2261	0.26	3.67	3.8192	1.14702e-19	1.78977e-18	Up	gi|270016376|gb|EFA12822.1|/1.88586e-31/domeless [Tribolium castaneum]	NA	sp|Q9JM58|CRLF1_MOUSE/2e-06/Cytokine receptor-like factor 1 OS=Mus musculus GN=Crlf1 PE=1 SV=1	tca:100142217/4e-32/Dome; domeless; K19599 cytokine receptor domeless	NA	PTHR23036/1.1E-14/--	NA
Unigene40267_All	857	0.6	8.45	3.81592	3.98858e-16	5.25318e-15	Up	gi|405960491|gb|EKC26412.1|/1.82025e-15/hypothetical protein CGI_10016853 [Crassostrea gigas]	NA	NA	NA	NA	NA	NA
CL1237.Contig1_All	2551	0.14	1.97	3.8147	1.99525e-12	2.11997e-11	Up	gi|405961096|gb|EKC26950.1|/1.07074e-62/Putative inhibitor of apoptosis [Crassostrea gigas]	NA	sp|Q8JHV9|BIR7A_XENLA/1e-42/Baculoviral IAP repeat-containing protein 7-A OS=Xenopus laevis GN=birc7-a PE=1 SV=1	crg:105331304/6e-63/baculoviral IAP repeat-containing protein 7-like; K16060 baculoviral IAP repeat-containing protein 2/3	NA	PS50143/18.749/BIR repeat profile.	NA
Unigene32137_All	952	0.32	4.47	3.80413	5.70566e-10	5.11897e-09	Up	NA	gi|431971081|gb|JX233811.1|/6e-06/Chlamys farreri goose-type lysozyme gene, complete cds	NA	NA	NA	NA	NA
Unigene31692_All	319	0.72	10.05	3.80305	5.337e-07	3.68476e-06	Up	NA	gi|255098792|gb|FJ590509.1|/5e-13/Argopecten irradians manganese superoxide dismutase (MnSOD) gene, complete cds	NA	NA	NA	NA	NA
Unigene5033_All	808	0.51	7.1	3.79925	6.41654e-13	7.0192e-12	Up	gi|405958412|gb|EKC24542.1|/4.45026e-29/Regulator of G-protein signaling 22 [Crassostrea gigas]	NA	NA	dsi:Dsim_GD20361/1e-06/GD20361 gene product from transcript GD20361-RA; K14826 FK506-binding nuclear protein [EC:5.2.1.8]	NA	NA	NA
CL473.Contig5_All	1371	0.37	5.15	3.79898	7.42754e-16	9.60009e-15	Up	gi|556095634|gb|ESO84287.1|/3.92763e-20/hypothetical protein LOTGIDRAFT_176188, partial [Lottia gigantea]	NA	sp|Q5ND28|SREC_MOUSE/1e-11/Scavenger receptor class F member 1 OS=Mus musculus GN=Scarf1 PE=1 SV=1	crg:105333895/1e-16/uncharacterized LOC105333895; K18032 receptor-type tyrosine-protein phosphatase A [EC:3.1.3.48]	NA	NA	NA
Unigene14220_All	1039	1.37	19.01	3.79451	4.37406e-42	1.39204e-40	Up	NA	NA	NA	NA	NA	NA	NA
Unigene14028_All	473	0.46	6.38	3.79385	5.337e-07	3.68645e-06	Up	gi|443726904|gb|ELU13900.1|/5.95518e-55/hypothetical protein CAPTEDRAFT_175940 [Capitella teleta]	gi|524911055|ref|XM_005110342.1|/1e-20/PREDICTED: Aplysia californica translocating chain-associated membrane protein 1-like 1-like (LOC101864568), transcript variant X3, mRNA	sp|Q91V04|TRAM1_MOUSE/9e-47/Translocating chain-associated membrane protein 1 OS=Mus musculus GN=Tram1 PE=1 SV=3	crg:105325513/1e-58/translocating chain-associated membrane protein 1-like 1; K14010 translocating chain-associated membrane protein 1	NA	PF08390/1.9E-21/TRAM1-like protein	NA
Unigene32549_All	932	0.22	3.05	3.79323	5.337e-07	3.6856e-06	Up	gi|224967052|ref|NP_001139300.1|/8.87411e-06/toll-like receptor 5 [Rattus norvegicus] &gt;gi|149040926|gb|EDL94883.1| rCG20122 [Rattus norvegicus]	NA	NA	rno:289337/2e-06/Tlr5; toll-like receptor 5; K10168 toll-like receptor 5	NA	NA	NA
Unigene38145_All	652	0.26	3.59	3.7874	3.34642e-06	2.11614e-05	Up	gi|33331169|gb|AAQ10794.1|/3.35586e-38/NADPH-dependent FMN and FAD containing oxidoreductase-like protein [Branchiostoma floridae]	gi|525015648|ref|XM_005055345.1|/1e-09/PREDICTED: Ficedula albicollis NADPH dependent diflavin oxidoreductase 1 (NDOR1), transcript variant X4, mRNA	sp|Q6NRG5|NDOR1_XENLA/3e-36/NADPH-dependent diflavin oxidoreductase 1 OS=Xenopus laevis GN=ndor1 PE=2 SV=1	dmo:Dmoj_GI11531/6e-25/GI11531 gene product from transcript GI11531-RA; K00327 NADPH-ferrihemoprotein reductase [EC:1.6.2.4]	SPAC1296.06/2e-27/---	PTHR19384:SF10/5.3E-59/--	biological_process:GO:0008152//metabolic process;molecular_function:GO:0016651//oxidoreductase activity, acting on NAD(P)H;GO:0000166//nucleotide binding;GO:0050662//coenzyme binding;
Unigene19499_All	2261	1.4	19.32	3.7866	9.47486e-94	6.92618e-92	Up	gi|405977691|gb|EKC42127.1|/2.63618e-142/Solute carrier family 22 member 6-A [Crassostrea gigas]	NA	sp|Q9Y226|S22AD_HUMAN/1e-71/Solute carrier family 22 member 13 OS=Homo sapiens GN=SLC22A13 PE=2 SV=2	crg:105321823/4e-142/organic cation transporter protein-like; K08202 MFS transporter, OCT family, solute carrier family 22 (organic cation transporter), member 4/5	SMa1447/3e-32/---	PTHR24064/1.4E-173/--	NA
CL414.Contig2_All	3416	0.09	1.24	3.78427	3.0586e-10	2.79567e-09	Up	gi|405969360|gb|EKC34336.1|/1.49729e-62/hypothetical protein CGI_10023442 [Crassostrea gigas]	NA	sp|Q07283|TRHY_HUMAN/3e-16/Trichohyalin OS=Homo sapiens GN=TCHH PE=1 SV=2	crg:105330303/6e-25/trichohyalin-like; K16771 centrosome and spindle pole-associated protein 1	NA	NA	NA
Unigene3603_All	977	1.25	17.19	3.78157	9.82752e-36	2.64943e-34	Up	gi|260833794|ref|XP_002611897.1|/4.62492e-08/hypothetical protein BRAFLDRAFT_106805 [Branchiostoma floridae] &gt;gi|229297269|gb|EEN67906.1| hypothetical protein BRAFLDRAFT_106805 [Branchiostoma floridae]	NA	sp|O01761|UNC89_CAEEL/6e-08/Muscle M-line assembly protein unc-89 OS=Caenorhabditis elegans GN=unc-89 PE=1 SV=3	oaa:100079833/3e-08/THOC2; THO complex 2; K12879 THO complex subunit 2	NA	NA	NA
CL419.Contig4_All	3493	0.74	10.17	3.78065	3.59736e-77	2.16733e-75	Up	gi|524868005|ref|XP_005090809.1|/1.70914e-37/PREDICTED: RNA-binding protein lark-like isoform X2 [Aplysia californica]	NA	sp|Q94901|LARK_DROME/1e-21/RNA-binding protein lark OS=Drosophila melanogaster GN=lark PE=1 SV=1	spu:587717/3e-32/RNA-binding protein 4.1; K13187 RNA-binding protein 4	SPAC140.02/5e-10/---	NA	NA
CL5198.Contig1_All	1947	0.25	3.43	3.77821	2.56882e-15	3.23222e-14	Up	gi|405961705|gb|EKC27466.1|/5.05119e-163/hypothetical protein CGI_10005453 [Crassostrea gigas]	NA	sp|Q63HN8|RN213_HUMAN/2e-61/E3 ubiquitin-protein ligase RNF213 OS=Homo sapiens GN=RNF213 PE=1 SV=3	NA	NA	PTHR22605:SF7/1.8E-68/--	NA
Unigene38132_All	833	0.25	3.43	3.77821	5.337e-07	3.68687e-06	Up	gi|405971821|gb|EKC36631.1|/6.31494e-58/Heat shock 70 kDa protein 12A [Crassostrea gigas]	NA	sp|Q8K0U4|HS12A_MOUSE/5e-38/Heat shock 70 kDa protein 12A OS=Mus musculus GN=Hspa12a PE=1 SV=1	aqu:100633272/2e-20/uncharacterized LOC100633272; K10380 ankyrin	MTH1290/2e-07/---	PTHR14187/3.5E-54/--	NA
CL2649.Contig5_All	2417	2.72	37.29	3.77711	6.61348e-192	1.08677e-189	Up	gi|405953213|gb|EKC20918.1|/2.90212e-94/Gamma-aminobutyric acid receptor subunit gamma-2 [Crassostrea gigas]	NA	sp|Q5JXX5|GLRA4_HUMAN/3e-12/Glycine receptor subunit alpha-4 OS=Homo sapiens GN=GLRA4 PE=2 SV=3	asn:102376195/4e-12/GABRB1; gamma-aminobutyric acid (GABA) A receptor, beta 1; K05181 gamma-aminobutyric acid receptor subunit beta	NA	PF02931/1.2E-13/Neurotransmitter-gated ion-channel ligand binding domain	NA
Unigene40341_All	752	0.41	5.61	3.7743	1.06286e-09	9.36844e-09	Up	gi|405975247|gb|EKC39828.1|/8.64732e-13/von Willebrand factor D and EGF domain-containing protein [Crassostrea gigas]	NA	sp|Q862Z3|UROM_CANFA/7e-08/Uromodulin OS=Canis familiaris GN=UMOD PE=2 SV=1	cfa:403510/7e-07/UMOD; uromodulin; K18274 uromodulin	NA	PTHR22962:SF57/7.6E-14/--	NA
Unigene33996_All	987	0.21	2.87	3.77259	5.337e-07	3.68603e-06	Up	NA	NA	NA	NA	NA	NA	NA
Unigene45683_All	808	0.26	3.55	3.77124	5.337e-07	3.68518e-06	Up	NA	NA	NA	NA	NA	NA	NA
CL489.Contig1_All	1065	1.05	14.19	3.75641	2.74618e-32	6.72965e-31	Up	gi|405977776|gb|EKC42210.1|/2.43839e-37/Glioma pathogenesis-related protein 1 [Crassostrea gigas]	NA	sp|Q9ET66|PI16_MOUSE/2e-29/Peptidase inhibitor 16 OS=Mus musculus GN=Pi16 PE=2 SV=1	spu:574641/1e-17/probable G-protein coupled receptor 128; K10401 kinesin family member 18/19	YJL078c_1/1e-17/---	PF00188/2.1E-24/Cysteine-rich secretory protein family	NA
CL398.Contig2_All	1411	0.14	1.89	3.75489	1.85331e-06	1.20571e-05	Up	gi|405978075|gb|EKC42490.1|/2.47509e-25/hypothetical protein CGI_10023152 [Crassostrea gigas]	NA	sp|Q01956|KCNC3_RAT/7e-07/Potassium voltage-gated channel subfamily C member 3 OS=Rattus norvegicus GN=Kcnc3 PE=2 SV=1	dre:799410/8e-06/kcnc4, si:ch211-199o1.1; potassium voltage-gated channel, Shaw-related subfamily, member 4; K04890 potassium voltage-gated channel Shaw-related subfamily C member 4	NA	PTHR11537:SF48/1.7E-12/--	NA
CL1053.Contig4_All	2723	2.61	35.16	3.75181	7.98646e-203	1.41661e-200	Up	gi|556097134|gb|ESO85786.1|/1.44951e-75/hypothetical protein LOTGIDRAFT_235746 [Lottia gigantea]	NA	sp|P0CAT2|S238B_DANRE/2e-67/Solute carrier family 25 member 38-B OS=Danio rerio GN=slc25a38b PE=3 SV=2	crg:105325582/1e-81/solute carrier family 25 member 38-like; K15118 solute carrier family 25, member 38	NA	PTHR24089/2.2E-47/--	NA
Unigene41403_All	500	0.43	5.78	3.74866	9.95604e-07	6.6744e-06	Up	NA	gi|255098792|gb|FJ590509.1|/2e-13/Argopecten irradians manganese superoxide dismutase (MnSOD) gene, complete cds	NA	NA	NA	NA	NA
Unigene37678_All	938	0.33	4.43	3.74677	1.06286e-09	9.36707e-09	Up	gi|405955504|gb|EKC22595.1|/1.68119e-28/Carbohydrate sulfotransferase 11 [Crassostrea gigas]	NA	sp|Q7T3S3|CHSTB_DANRE/3e-15/Carbohydrate sulfotransferase 11 OS=Danio rerio GN=chst11 PE=2 SV=1	crg:105322816/3e-29/carbohydrate sulfotransferase 13-like; K01017 chondroitin 4-sulfotransferase 11 [EC:2.8.2.5]	NA	NA	NA
CL5233.Contig2_All	755	0.55	7.37	3.74416	2.22074e-12	2.35168e-11	Up	NA	NA	NA	NA	NA	NA	NA
Unigene32063_All	827	0.25	3.34	3.73985	9.95604e-07	6.66847e-06	Up	gi|29244162|ref|NP_808373.1|/7.6817e-24/Myb-like DNA-binding domain containing protein [Mus musculus] &gt;gi|109734507|gb|AAI17866.1| RIKEN cDNA 4932411N23 gene [Mus musculus] &gt;gi|109734898|gb|AAI17865.1| RIKEN cDNA 4932411N23 gene [Mus musculus] &gt;gi|148688498|gb|EDL20445.1| RIKEN cDNA 4932411N23 [Mus musculus]	NA	sp|Q66HG1|DMTF1_RAT/2e-24/Cyclin-D-binding Myb-like transcription factor 1 OS=Rattus norvegicus GN=Dmtf1 PE=2 SV=2	tgu:101234254/3e-18/TTF1; transcription termination factor, RNA polymerase I; K15225 transcription termination factor 1	SPBC1198.11c/2e-10/---	PTHR10641/8.1E-22/--	NA
CL3122.Contig4_All	2805	0.37	4.94	3.73891	5.42734e-31	1.28307e-29	Up	gi|405963345|gb|EKC28928.1|/1.01474e-61/Myosin-VIIa [Crassostrea gigas]	gi|542201963|ref|XM_005474945.1|/7e-33/PREDICTED: Oreochromis niloticus unconventional myosin-VIIa-like (LOC100692718), mRNA	sp|Q17LW0|MYO7A_AEDAE/1e-60/Myosin-VIIa OS=Aedes aegypti GN=ck PE=3 SV=1	crg:105326335/2e-62/myosin-VIIa-like; K10359 myosin VII	NA	PS50057/22.162/FERM domain profile.	NA
CL5174.Contig2_All	764	0.6	8.01	3.73877	9.88548e-14	1.13643e-12	Up	NA	NA	NA	NA	NA	NA	NA
Unigene7565_All	418	0.53	7.07	3.73765	9.95604e-07	6.67366e-06	Up	NA	NA	NA	NA	NA	NA	NA
Unigene33956_All	484	0.45	5.99	3.73456	9.95604e-07	6.67514e-06	Up	NA	NA	NA	NA	NA	NA	NA
Unigene47778_All	772	0.27	3.59	3.73295	9.95604e-07	6.66773e-06	Up	gi|556116860|gb|ESP05512.1|/1.18779e-12/hypothetical protein LOTGIDRAFT_152367 [Lottia gigantea]	NA	NA	NA	NA	NA	NA
CL2273.Contig2_All	739	0.42	5.58	3.7318	1.97699e-09	1.70814e-08	Up	gi|123417854|ref|XP_001305198.1|/2.86291e-21/ankyrin repeat protein [Trichomonas vaginalis G3]	NA	sp|Q9TZM3|LRK1_CAEEL/3e-14/Leucine-rich repeat serine/threonine-protein kinase 1 OS=Caenorhabditis elegans GN=lrk-1 PE=1 SV=6	tca:103315105/2e-17/uncharacterized LOC103315105; K10380 ankyrin	NA	PS50297/25.965/Ankyrin repeat region circular profile.	NA
Unigene2489_All	3060	0.39	5.18	3.73141	6.28582e-35	1.66193e-33	Up	gi|405975752|gb|EKC40300.1|/3.63544e-28/hypothetical protein CGI_10023735 [Crassostrea gigas]	NA	sp|Q02224|CENPE_HUMAN/6e-07/Centromere-associated protein E OS=Homo sapiens GN=CENPE PE=1 SV=2	ola:101166347/4e-10/trichohyalin-like; K16464 centrosomal protein CEP250	MK0690/9e-07/---	NA	NA
Unigene32894_All	900	0.23	3.05	3.7291	9.95604e-07	6.67291e-06	Up	gi|405958342|gb|EKC24478.1|/1.97289e-47/hypothetical protein CGI_10019581 [Crassostrea gigas]	NA	NA	NA	NA	PTHR22924/1.8E-20/--	NA
Unigene39022_All	1383	0.44	5.83	3.72792	5.62372e-18	8.10988e-17	Up	NA	NA	NA	NA	NA	NA	NA
CL3513.Contig2_All	1033	0.59	7.81	3.72654	1.04354e-17	1.48324e-16	Up	gi|405951331|gb|EKC19253.1|/2.95545e-16/hypothetical protein CGI_10009106 [Crassostrea gigas]	NA	NA	NA	NA	NA	NA
Unigene20653_All	704	0.3	3.97	3.7261	9.95604e-07	6.67143e-06	Up	gi|405965270|gb|EKC30656.1|/2.65466e-50/Tubulin monoglycylase TTLL3 [Crassostrea gigas]	NA	sp|Q9Y4R7|TTLL3_HUMAN/2e-31/Tubulin monoglycylase TTLL3 OS=Homo sapiens GN=TTLL3 PE=1 SV=2	crg:105327425/6e-51/protein monoglycylase TTLL8-like; K16608 tubulin monoglycylase TTLL3/8 [EC:6.3.2.-]	NA	PF03133/6.2E-18/Tubulin-tyrosine ligase family	NA
CL801.Contig4_All	2090	0.33	4.35	3.72048	5.96176e-21	9.83968e-20	Up	gi|556096104|gb|ESO84756.1|/7.41338e-51/hypothetical protein LOTGIDRAFT_236111 [Lottia gigantea]	NA	sp|Q6DDY9|RT07_XENLA/2e-32/28S ribosomal protein S7, mitochondrial OS=Xenopus laevis GN=mrps7 PE=2 SV=1	cfo:105249098/1e-35/28S ribosomal protein S7, mitochondrial; K02992 small subunit ribosomal protein S7	RC0173/9e-17/---	PS50222/8.516/EF-hand calcium-binding domain profile.	NA
Unigene32873_All	918	0.33	4.31	3.70715	3.67168e-09	3.10215e-08	Up	NA	NA	NA	NA	NA	NA	NA
Unigene8767_All	4200	0.84	10.95	3.7044	4.23436e-98	3.22432e-96	Up	gi|556108271|gb|ESO96923.1|/3.548e-170/hypothetical protein LOTGIDRAFT_231723 [Lottia gigantea]	gi|459182046|ref|XM_002119851.2|/5e-07/PREDICTED: Ciona intestinalis transglutaminase-like protein-like (LOC100183770), mRNA	sp|Q05187|TGMH_TACTR/4e-150/Hemocyte protein-glutamine gamma-glutamyltransferase OS=Tachypleus tridentatus PE=1 SV=1	amj:102560672/6e-143/TGM1; transglutaminase 1; K05619 transglutaminase 1 [EC:2.3.2.13]	NA	SM00460/6.9E-39/Transglutaminase/protease-like homologues	NA
Unigene9198_All	2231	2.79	36.36	3.70402	1.46026e-169	2.08686e-167	Up	gi|405951350|gb|EKC19270.1|/3.25896e-60/Putative tyrosinase-like protein tyr-1 [Crassostrea gigas]	NA	sp|P86952|TYRO_PINMA/1e-31/Tyrosinase-like protein OS=Pinctada maxima PE=1 SV=1	crg:105323046/8e-40/uncharacterized LOC105323046; K00505 tyrosinase [EC:1.14.18.1]	NA	PF00264/3.2E-14/Common central domain of tyrosinase	NA
CL3315.Contig1_All	498	0.43	5.59	3.70044	1.85331e-06	1.20597e-05	Up	NA	NA	NA	NA	NA	NA	NA
CL548.Contig2_All	675	0.54	7.02	3.70044	8.75434e-11	8.35242e-10	Up	NA	NA	NA	NA	NA	NA	NA
Unigene6677_All	2427	1.55	20.14	3.69972	4.33818e-103	3.52122e-101	Up	gi|405959189|gb|EKC25250.1|/0/Laccase-2 [Crassostrea gigas]	NA	NA	aqu:100635277/1e-25/uncharacterized LOC100635277; K11989 indian hedgehog	YMR058w/4e-38/---	PS00080/-/Multicopper oxidases signature 2.	NA
CL1678.Contig2_All	606	0.52	6.75	3.6983	3.67168e-09	3.10346e-08	Up	NA	NA	NA	NA	NA	NA	NA
CL1726.Contig4_All	1363	1.32	17.09	3.69454	1.00931e-49	3.82347e-48	Up	gi|556114734|gb|ESP03386.1|/4.2975e-11/hypothetical protein LOTGIDRAFT_237695 [Lottia gigantea]	NA	sp|O60494|CUBN_HUMAN/4e-11/Cubilin OS=Homo sapiens GN=CUBN PE=1 SV=5	pps:100994361/1e-10/CUBN; cubilin (intrinsic factor-cobalamin receptor); K14616 cubilin	NA	PTHR10127/6.1E-18/--	NA
Unigene42194_All	667	0.47	6.08	3.69334	3.67168e-09	3.10389e-08	Up	NA	NA	NA	NA	NA	NA	NA
CL4801.Contig1_All	633	6.5	83.87	3.68964	2.2075e-104	1.82871e-102	Up	gi|470407818|ref|XP_004336073.1|/4.07576e-46/Calmodulin, putative [Acanthamoeba castellanii str. Neff] &gt;gi|440792852|gb|ELR14060.1| Calmodulin, putative [Acanthamoeba castellanii str. Neff]	NA	sp|P02598|CALM_TETPY/2e-47/Calmodulin OS=Tetrahymena pyriformis PE=1 SV=4	smm:Smp_026560.2/1e-45/calmodulin; K02183 calmodulin	SPAC3A12.14/1e-38/---	PS50222/14.151/EF-hand calcium-binding domain profile.	molecular_function:GO:0005509//calcium ion binding;
Unigene32545_All	718	0.58	7.48	3.68891	7.65022e-12	7.81585e-11	Up	NA	NA	NA	NA	NA	NA	NA
Unigene10515_All	3150	2.25	29	3.68806	1.36157e-191	2.23134e-189	Up	gi|405952793|gb|EKC20561.1|/7.42918e-101/hypothetical protein CGI_10005830 [Crassostrea gigas]	NA	NA	ola:101169150/4e-06/cdk13; cyclin-dependent kinase 13; K08819 cyclin-dependent kinase 12/13 [EC:2.7.11.22 2.7.11.23]	NA	PTHR23080:SF63/5.0E-93/--	NA
Unigene34907_All	2447	0.44	5.67	3.68777	3.8076e-30	8.73778e-29	Up	gi|405951598|gb|EKC19496.1|/8.82958e-107/Heat shock 70 kDa protein 12A [Crassostrea gigas]	NA	sp|Q96MM6|HS12B_HUMAN/2e-78/Heat shock 70 kDa protein 12B OS=Homo sapiens GN=HSPA12B PE=2 SV=2	aqu:100633272/4e-33/uncharacterized LOC100633272; K10380 ankyrin	TM0373/1e-10/---	PTHR14187/6.7E-114/--	NA
CL4621.Contig1_All	1211	0.33	4.25	3.68692	1.99525e-12	2.12034e-11	Up	gi|405964571|gb|EKC30040.1|/3.88181e-13/hypothetical protein CGI_10012335 [Crassostrea gigas]	NA	NA	ame:725245/1e-06/GB16764; uncharacterized LOC725245; K16678 eiger	NA	PS50049/11.542/TNF family profile.	NA
CL2590.Contig3_All	1225	7.85	101.08	3.68666	5.69642e-252	1.29638e-249	Up	NA	NA	NA	NA	NA	NA	NA
Unigene39661_All	958	0.32	4.12	3.6865	3.67168e-09	3.10259e-08	Up	gi|405945597|gb|EKC17398.1|/3.07914e-33/Latrophilin-3 [Crassostrea gigas]	NA	NA	NA	NA	NA	NA
CL730.Contig2_All	436	1.01	12.98	3.68386	7.65022e-12	7.8185e-11	Up	NA	NA	NA	NA	NA	NA	NA
CL1873.Contig3_All	2997	22.06	282.83	3.68043	0	0	Up	NA	gi|255098792|gb|FJ590509.1|/3e-26/Argopecten irradians manganese superoxide dismutase (MnSOD) gene, complete cds	NA	NA	NA	NA	NA
Unigene37844_All	963	0.32	4.1	3.67948	3.67168e-09	3.10302e-08	Up	NA	NA	NA	NA	NA	NA	NA
CL2262.Contig3_All	1188	1.46	18.7	3.679	3.0574e-46	1.06152e-44	Up	gi|405963848|gb|EKC29386.1|/1.53145e-30/hypothetical protein CGI_10012092 [Crassostrea gigas]	NA	NA	NA	NA	NA	NA
Unigene46578_All	807	0.26	3.3	3.66588	1.85331e-06	1.20584e-05	Up	gi|405962584|gb|EKC28247.1|/2.94908e-41/Tenascin-X [Crassostrea gigas]	NA	sp|Q14162|SREC_HUMAN/1e-25/Scavenger receptor class F member 1 OS=Homo sapiens GN=SCARF1 PE=1 SV=3	crg:105333895/1e-38/uncharacterized LOC105333895; K18032 receptor-type tyrosine-protein phosphatase A [EC:3.1.3.48]	NA	SM00181/27.0/Epidermal growth factor-like domain.	NA
CL4099.Contig2_All	2725	0.41	5.19	3.66204	6.01098e-31	1.41883e-29	Up	gi|556103856|gb|ESO92508.1|/2.18981e-170/hypothetical protein LOTGIDRAFT_206565 [Lottia gigantea]	gi|611980704|ref|XM_001381318.3|/5e-15/PREDICTED: Monodelphis domestica tumor suppressing subtransferable candidate 1 (TSSC1), mRNA	sp|Q53HC9|TSSC1_HUMAN/5e-159/Protein TSSC1 OS=Homo sapiens GN=TSSC1 PE=1 SV=2	aqu:100635529/6e-14/peroxisomal targeting signal 2 receptor-like; K13341 peroxin-7	NA	PS50294/17.245/Trp-Asp (WD) repeats circular profile.	NA
Unigene31744_All	810	0.26	3.29	3.6615	1.85331e-06	1.20545e-05	Up	NA	gi|258650008|gb|GQ457348.1|/5e-06/Drosophila americana strain A99.48 tan (t) gene, complete cds	NA	NA	NA	NA	NA
Unigene1385_All	791	0.39	4.93	3.66004	6.8081e-09	5.61827e-08	Up	gi|521027639|gb|EPQ09427.1|/1.51898e-10/hypothetical protein D623_10006814, partial [Myotis brandtii]	NA	sp|Q5SS00|ZDBF2_MOUSE/3e-09/DBF4-type zinc finger-containing protein 2 homolog OS=Mus musculus GN=Zdbf2 PE=2 SV=1	aga:AgaP_AGAP004734/2e-07/AGAP004734-PA; K04650 nuclear receptor co-repressor 1	NA	NA	NA
CL26.Contig4_All	547	0.96	12.1	3.65583	1.50949e-14	1.82177e-13	Up	NA	NA	NA	NA	NA	NA	NA
Unigene3594_All	1917	1.04	13.08	3.65271	8.23704e-53	3.34744e-51	Up	gi|405964213|gb|EKC29720.1|/4.77742e-49/Sulfotransferase family cytosolic 1B member 1 [Crassostrea gigas]	gi|116834223|gb|EF032067.1|/1e-14/Apostichopus japonicus clone AH092 microsatellite sequence	sp|Q3T0Y3|ST1B1_BOVIN/2e-44/Sulfotransferase family cytosolic 1B member 1 OS=Bos taurus GN=SULT1B1 PE=2 SV=1	crg:105341506/6e-50/sulfotransferase family cytosolic 1B member 1-like; K01025	NA	PTHR11783/1.2E-89/--	NA
Unigene20179_All	2182	0.59	7.41	3.65069	1.25795e-34	3.30276e-33	Up	gi|443716912|gb|ELU08205.1|/3.5231e-43/hypothetical protein CAPTEDRAFT_110767 [Capitella teleta]	NA	sp|P83088|FUCTC_DROME/2e-31/Alpha-(1,3)-fucosyltransferase C OS=Drosophila melanogaster GN=FucTC PE=2 SV=4	mde:101900945/5e-40/alpha-(1,3)-fucosyltransferase C; K14464 alpha-1,3-fucosyltransferase [EC:2.4.1.-]	NA	PTHR11929:SF129/2.9E-74/--	NA
Unigene40583_All	2055	0.24	3.01	3.64866	5.6188e-14	6.54799e-13	Up	gi|405953788|gb|EKC21380.1|/3.29321e-11/Tetraspanin-1 [Crassostrea gigas]	NA	sp|Q7YQK9|TSN7_PONPY/4e-06/Tetraspanin-7 OS=Pongo pygmaeus GN=TSPAN7 PE=2 SV=1	crg:105327320/1e-11/tetraspanin-18-like; K17353 tetraspanin-18	NA	PF00335/7.7E-10/Tetraspanin family	NA
Unigene20296_All	1692	0.47	5.89	3.64753	1.12076e-21	1.90612e-20	Up	NA	NA	NA	NA	NA	NA	NA
Unigene35087_All	658	0.48	6.01	3.64626	6.8081e-09	5.6175e-08	Up	gi|156353793|ref|XP_001623096.1|/3.30394e-17/predicted protein [Nematostella vectensis] &gt;gi|156209756|gb|EDO30996.1| predicted protein [Nematostella vectensis]	NA	sp|Q91X17|UROM_MOUSE/7e-16/Uromodulin OS=Mus musculus GN=Umod PE=1 SV=1	mmu:22242/7e-15/Umod, THP, Urehd1, urehr4; uromodulin; K18274 uromodulin	NA	PTHR22962:SF57/1.3E-23/--	NA
Unigene41272_All	663	0.29	3.63	3.64584	1.74927e-06	1.14098e-05	Up	NA	NA	NA	NA	NA	NA	NA
Unigene44535_All	1036	0.39	4.87	3.64238	2.6223e-11	2.59766e-10	Up	NA	NA	NA	NA	NA	NA	NA
CL1430.Contig2_All	2598	1.24	15.48	3.64199	2.20824e-84	1.44128e-82	Up	gi|443702915|gb|ELU00738.1|/3.52093e-178/hypothetical protein CAPTEDRAFT_175752 [Capitella teleta]	gi|541985837|ref|XM_005444412.1|/4e-06/PREDICTED: Falco cherrug solute carrier family 6 (neurotransmitter transporter), member 11 (SLC6A11), mRNA	sp|P28570|SC6A8_RAT/6e-162/Sodium- and chloride-dependent creatine transporter 1 OS=Rattus norvegicus GN=Slc6a8 PE=2 SV=1	crg:105329948/2e-177/sodium- and chloride-dependent taurine transporter-like; K05039 solute carrier family 6 (neurotransmitter transporter, GABA) member 6/8/11/12/13	VC2012/3e-61/---	PS00754/-/Sodium:neurotransmitter symporter family signature 2.	NA
Unigene15660_All	2350	2.9	36.18	3.64107	1.83508e-175	2.74615e-173	Up	NA	gi|255098792|gb|FJ590509.1|/3e-10/Argopecten irradians manganese superoxide dismutase (MnSOD) gene, complete cds	NA	NA	NA	PF00229/9.1E-7/TNF(Tumour Necrosis Factor) family	NA
CL620.Contig2_All	1009	0.31	3.85	3.63452	6.8081e-09	5.61673e-08	Up	gi|597755217|ref|XP_007239392.1|/3.035e-18/PREDICTED: interferon-induced protein 44-like [Astyanax mexicanus]	NA	sp|Q8TCB0|IFI44_HUMAN/2e-10/Interferon-induced protein 44 OS=Homo sapiens GN=IFI44 PE=2 SV=2	xma:102225574/2e-09/uncharacterized LOC102225574; K07374 tubulin alpha	NA	PS50835/7.105/Ig-like domain profile.	NA
Unigene4354_All	2792	0.24	2.97	3.62936	8.76016e-19	1.30866e-17	Up	gi|405962584|gb|EKC28247.1|/1.38929e-111/Tenascin-X [Crassostrea gigas]	NA	sp|O88281|MEGF6_RAT/6e-67/Multiple epidermal growth factor-like domains protein 6 OS=Rattus norvegicus GN=Megf6 PE=1 SV=1	crg:105333895/2e-107/uncharacterized LOC105333895; K18032 receptor-type tyrosine-protein phosphatase A [EC:3.1.3.48]	NA	PTHR24035:SF29/1.9E-29/--	NA
Unigene42160_All	1783	0.25	3.09	3.62761	1.19438e-12	1.28696e-11	Up	gi|405971280|gb|EKC36126.1|/7.2442e-36/Fibroblast growth factor receptor 2 [Crassostrea gigas]	NA	sp|Q8N2E2|VWDE_HUMAN/2e-14/von Willebrand factor D and EGF domain-containing protein OS=Homo sapiens GN=VWDE PE=2 SV=4	crg:105347506/6e-20/uncharacterized LOC105347506; K05094 fibroblast growth factor receptor 3 [EC:2.7.10.1]	NA	SM00181/67.0/Epidermal growth factor-like domain.	NA
Unigene43811_All	807	0.38	4.69	3.62552	1.26024e-08	1.01921e-07	Up	NA	NA	NA	NA	NA	NA	NA
CL4266.Contig2_All	605	0.52	6.41	3.62374	1.80494e-09	1.56577e-08	Up	NA	NA	NA	NA	NA	NA	NA
Unigene1342_All	809	0.38	4.68	3.62244	1.26024e-08	1.01907e-07	Up	gi|405955240|gb|EKC22431.1|/1.93936e-16/hypothetical protein CGI_10002304 [Crassostrea gigas]	NA	NA	NA	NA	NA	NA
Unigene47668_All	801	0.26	3.2	3.62149	3.44206e-06	2.17138e-05	Up	NA	NA	NA	NA	NA	NA	NA
CL2109.Contig2_All	1448	6.96	85.53	3.61927	3.37946e-250	7.60479e-248	Up	gi|591370092|ref|XP_007059874.1|/3.70439e-24/PREDICTED: baculoviral IAP repeat-containing protein 7 [Chelonia mydas]	NA	sp|A9ULZ2|BIR7B_XENLA/3e-22/Baculoviral IAP repeat-containing protein 7-B OS=Xenopus laevis GN=birc7-b PE=2 SV=2	cmy:102942602/7e-25/BIRC7; baculoviral IAP repeat containing 7; K16061 baculoviral IAP repeat-containing protein 7/8	NA	SM00238/4.7E-7/Baculoviral inhibition of apoptosis protein repeat	NA
Unigene32134_All	420	0.53	6.51	3.61859	3.44206e-06	2.17183e-05	Up	NA	NA	NA	NA	NA	NA	NA
Unigene43397_All	745	0.51	6.24	3.61298	8.75434e-11	8.35375e-10	Up	gi|307207090|gb|EFN84899.1|/2.52456e-25/RNA-binding protein 10 [Harpegnathos saltator]	NA	sp|Q54WE5|PRP4B_DICDI/1e-20/Serine/threonine-protein kinase prpf4B OS=Dictyostelium discoideum GN=prpf4B PE=3 SV=1	crg:105331958/3e-42/RNA-binding protein 5-like; K13094 RNA-binding protein 5/10	NA	NA	NA
Unigene34992_All	778	0.27	3.3	3.61143	3.44206e-06	2.17161e-05	Up	NA	NA	NA	NA	NA	NA	NA
CL604.Contig1_All	2831	0.52	6.35	3.61017	4.83448e-38	1.39036e-36	Up	gi|405969780|gb|EKC34731.1|/0/Far upstream element-binding protein 3 [Crassostrea gigas]	gi|532003929|ref|XM_005346100.1|/8e-11/PREDICTED: Microtus ochrogaster far upstream element (FUSE) binding protein 3 (Fubp3), transcript variant X2, mRNA	sp|Q96AE4|FUBP1_HUMAN/1e-126/Far upstream element-binding protein 1 OS=Homo sapiens GN=FUBP1 PE=1 SV=3	crg:105324686/0.0/far upstream element-binding protein 1-like; K13210 far upstream element-binding protein	XF0818/1e-11/---	PTHR10288:SF145/6.1E-160/--	NA
CL144.Contig1_All	3439	0.84	10.25	3.60909	7.80544e-74	4.48742e-72	Up	gi|405952501|gb|EKC20303.1|/3.03429e-71/DnaJ-like protein subfamily B member 3 [Crassostrea gigas]	gi|41053502|ref|NM_200305.1|/3e-14/Danio rerio DnaJ (Hsp40) homolog, subfamily B, member 6b (dnajb6b), mRNA >gi|29436547|gb|BC049536.1| Danio rerio DnaJ (Hsp40) homolog, subfamily B, member 6, mRNA (cDNA clone MGC:56709 IMAGE:6034324), complete cds	sp|Q4R7Y5|DNJB6_MACFA/1e-57/DnaJ homolog subfamily B member 6 OS=Macaca fascicularis GN=DNAJB6 PE=2 SV=1	crg:105326853/5e-80/dnaJ homolog subfamily B member 6-like; K09512 DnaJ homolog subfamily B member 6	TVN0487/7e-25/---	PTHR24077:SF225/1.1E-99/--	NA
Unigene32037_All	384	1.16	14.15	3.60861	4.84536e-11	4.71085e-10	Up	gi|556100864|gb|ESO89516.1|/5.52182e-16/hypothetical protein LOTGIDRAFT_125127 [Lottia gigantea]	NA	sp|Q55FI3|SYNM_DICDI/1e-15/Probable asparagine--tRNA ligase, mitochondrial OS=Dictyostelium discoideum GN=asnS2 PE=3 SV=1	dpe:Dper_GL10450/3e-15/GL10450 gene product from transcript GL10450-RA; K01893 asparaginyl-tRNA synthetase [EC:6.1.1.22]	alr3658/2e-13/---	NA	biological_process:GO:0016310//phosphorylation;GO:0006421//asparaginyl-tRNA aminoacylation;cellular_component:GO:0005737//cytoplasm;molecular_function:GO:0016774//phosphotransferase activity, carboxyl group as acceptor;GO:0005524//ATP binding;GO:0016301//kinase activity;GO:0004816//asparagine-tRNA ligase activity;GO:0003676//nucleic acid binding;
Unigene5354_All	1159	0.44	5.36	3.60666	1.03818e-13	1.19168e-12	Up	gi|556116516|gb|ESP05168.1|/3.49269e-157/hypothetical protein LOTGIDRAFT_102562 [Lottia gigantea]	gi|597768890|ref|XM_007248208.1|/4e-17/PREDICTED: Astyanax mexicanus phosphoglucomutase 1 (pgm1), mRNA	sp|Q08DP0|PGM1_BOVIN/4e-139/Phosphoglucomutase-1 OS=Bos taurus GN=PGM1 PE=2 SV=1	crg:105348082/9e-150/phosphoglucomutase-1-like; K01835 phosphoglucomutase [EC:5.4.2.2]	SPBC32F12.10/5e-104/---	PR00509/3.38E-17/Phosphoglucomutase/phosphomannomutase family signature	NA
Unigene36825_All	1091	0.28	3.41	3.60627	1.26024e-08	1.01962e-07	Up	gi|405951457|gb|EKC19368.1|/5.78566e-50/Sine oculis-binding-like protein [Crassostrea gigas]	NA	NA	NA	NA	NA	NA
Unigene32175_All	715	0.44	5.35	3.60396	1.26024e-08	1.01866e-07	Up	NA	NA	NA	NA	NA	NA	NA
CL1211.Contig2_All	394	0.65	7.9	3.60334	5.337e-07	3.68729e-06	Up	NA	gi|193734886|gb|EU623967.1|/1e-14/Argopecten irradians clone HWDD134 microsatellite sequence	NA	NA	NA	NA	NA
CL3475.Contig1_All	488	0.67	8.14	3.6028	1.26024e-08	1.01852e-07	Up	NA	NA	NA	NA	NA	NA	NA
Unigene40308_All	1132	0.27	3.28	3.60266	1.26024e-08	1.01893e-07	Up	gi|432894207|ref|XP_004075958.1|/1.1286e-11/PREDICTED: uncharacterized protein LOC101172751 [Oryzias latipes]	NA	sp|Q54QQ2|Y5634_DICDI/3e-08/Uncharacterized protein DDB_G0283697 OS=Dictyostelium discoideum GN=DDB_G0283697 PE=4 SV=1	aec:105147379/8e-08/transcriptional regulator ATRX homolog; K10779 transcriptional regulator ATRX [EC:3.6.4.12]	NA	NA	NA
Unigene19726_All	2237	1.02	12.39	3.60254	8.73188e-58	3.88923e-56	Up	gi|405970940|gb|EKC35802.1|/3.91669e-13/Tripartite motif-containing protein 75 [Crassostrea gigas]	NA	NA	crg:105324713/3e-17/tripartite motif-containing protein 2-like; K11997 tripartite motif-containing protein 2/3	NA	PF00643/1.3E-6/B-box zinc finger	NA
Unigene44593_All	1827	0.44	5.34	3.60126	3.81796e-21	6.35708e-20	Up	gi|405978005|gb|EKC42423.1|/3.24524e-23/Protocadherin-11 X-linked [Crassostrea gigas]	NA	NA	crg:105328033/3e-24/protocadherin-11 Y-linked-like; K16498 protocadherin delta 1	NA	PS50268/9.059/Cadherins domain profile.	NA
Unigene38347_All	1715	0.46	5.58	3.60056	1.29689e-20	2.11558e-19	Up	gi|405965558|gb|EKC30924.1|/2.25695e-79/Membrane progestin receptor beta [Crassostrea gigas]	NA	sp|Q865K9|MPRB_PIG/5e-41/Membrane progestin receptor beta OS=Sus scrofa GN=PAQR8 PE=2 SV=1	dpe:Dper_GL13682/1e-15/GL13682 gene product from transcript GL13682-RA; K07297 adiponectin receptor	SPBC12C2.09c/5e-13/---	PTHR20855/1.1E-58/--	NA
Unigene41943_All	913	0.34	4.12	3.59904	1.26024e-08	1.01948e-07	Up	gi|405952320|gb|EKC20145.1|/3.82087e-38/Thrombospondin-1 [Crassostrea gigas]	NA	NA	NA	NA	NA	NA
Unigene31306_All	2657	0.97	11.73	3.59607	6.97604e-65	3.49428e-63	Up	gi|524906537|ref|XP_005108559.1|/4.71162e-69/PREDICTED: basement membrane-specific heparan sulfate proteoglycan core protein-like [Aplysia californica]	gi|545856409|ref|XM_005668599.1|/3e-10/PREDICTED: Sus scrofa E3 ubiquitin-protein ligase RNF213-like (LOC102163288), partial mRNA	sp|Q96RW7|HMCN1_HUMAN/4e-23/Hemicentin-1 OS=Homo sapiens GN=HMCN1 PE=1 SV=2	cmk:103177311/1e-33/B-cell receptor CD22-like; K06477 sialophorin; K06548 sialoadhesin	NA	PS50835/10.771/Ig-like domain profile.	NA
Unigene32338_All	732	0.28	3.38	3.59352	6.37714e-06	3.88085e-05	Up	NA	NA	NA	NA	NA	NA	NA
Unigene2506_All	668	0.31	3.73	3.58884	6.37714e-06	3.88007e-05	Up	gi|350402953|ref|XP_003486655.1|/2.16571e-19/PREDICTED: hypothetical protein LOC100741094, partial [Bombus impatiens]	gi|25168679|emb|AL806532.10|/7e-08/Mouse DNA sequence from clone RP23-387D16 on chromosome X, complete sequence	sp|P49756|RBM25_HUMAN/5e-15/RNA-binding protein 25 OS=Homo sapiens GN=RBM25 PE=1 SV=3	myb:102250416/1e-14/RBM25; RNA binding motif protein 25; K12822 RNA-binding protein 25	NA	NA	NA
Unigene1074_All	451	0.48	5.77	3.58747	6.37714e-06	3.8789e-05	Up	gi|585664956|ref|XP_006812109.1|/3.58483e-31/PREDICTED: bromodomain-containing protein DDB_G0280777-like [Saccoglossus kowalevskii]	gi|71385824|gb|DQ121099.1|/2e-10/Hucho taimen clone ZA-91 microsatellite sequence	sp|Q7ZVN7|MED15_DANRE/3e-27/Mediator of RNA polymerase II transcription subunit 15 OS=Danio rerio GN=med15 PE=2 SV=1	cmk:103183978/9e-30/med15; mediator complex subunit 15; K15157 mediator of RNA polymerase II transcription subunit 15	NA	PF09606/4.2E-29/ARC105 or Med15 subunit of Mediator complex non-fungal	NA
Unigene17425_All	2115	1.17	14.05	3.58599	1.85522e-61	8.82371e-60	Up	gi|524912508|ref|XP_005111101.1|/2.96441e-39/PREDICTED: alpha-(1,3)-fucosyltransferase C-like [Aplysia californica]	NA	sp|P83088|FUCTC_DROME/4e-35/Alpha-(1,3)-fucosyltransferase C OS=Drosophila melanogaster GN=FucTC PE=2 SV=4	dvi:Dvir_GJ18920/2e-37/GJ18920 gene product from transcript GJ18920-RA; K14464 alpha-1,3-fucosyltransferase [EC:2.4.1.-]	NA	PF00852/3.9E-61/Glycosyltransferase family 10 (fucosyltransferase)	NA
Unigene34927_All	690	0.3	3.6	3.58496	6.37714e-06	3.88164e-05	Up	NA	NA	NA	NA	NA	NA	NA
CL4437.Contig2_All	4825	0.42	5.04	3.58496	9.54842e-52	3.79595e-50	Up	gi|405959165|gb|EKC25227.1|/1.06166e-133/Hemicentin-1 [Crassostrea gigas]	NA	sp|Q96RW7|HMCN1_HUMAN/6e-40/Hemicentin-1 OS=Homo sapiens GN=HMCN1 PE=1 SV=2	crg:105328290/0.0/hemicentin-2-like; K16680 echinoid	NA	PTHR11640/1.4E-101/--	NA
CL2427.Contig8_All	2003	0.25	3	3.58496	1.91613e-13	2.16482e-12	Up	gi|405962584|gb|EKC28247.1|/1.01206e-73/Tenascin-X [Crassostrea gigas]	NA	sp|Q9XWD6|CED1_CAEEL/3e-40/Cell death abnormality protein 1 OS=Caenorhabditis elegans GN=ced-1 PE=1 SV=1	crg:105333895/4e-60/uncharacterized LOC105333895; K18032 receptor-type tyrosine-protein phosphatase A [EC:3.1.3.48]	NA	SM00181/100.0/Epidermal growth factor-like domain.	NA
Unigene47429_All	617	0.34	4.07	3.58142	6.37714e-06	3.87929e-05	Up	NA	NA	NA	NA	NA	NA	NA
Unigene4921_All	1301	1.39	16.63	3.58063	2.33596e-44	7.81348e-43	Up	NA	NA	NA	NA	NA	PF00229/2.3E-5/TNF(Tumour Necrosis Factor) family	NA
Unigene33124_All	429	0.51	6.1	3.58024	6.37714e-06	3.87851e-05	Up	gi|405960621|gb|EKC26527.1|/1.21734e-23/Toll-like receptor 13 [Crassostrea gigas]	NA	sp|P58682|TLR8_MOUSE/4e-11/Toll-like receptor 8 OS=Mus musculus GN=Tlr8 PE=1 SV=2	crg:105330702/8e-22/toll-like receptor 2; K18808 toll-like receptor 13	NA	PS51450/7.003/Leucine-rich repeat profile.	NA
Unigene43250_All	489	0.44	5.26	3.57949	6.37714e-06	3.88124e-05	Up	gi|556097159|gb|ESO85811.1|/1.446e-17/hypothetical protein LOTGIDRAFT_235765 [Lottia gigantea]	NA	NA	NA	NA	NA	NA
Unigene13294_All	1042	1.66	19.83	3.57843	5.46918e-42	1.7378e-40	Up	NA	gi|498961726|ref|XM_004545424.1|/4e-07/PREDICTED: Maylandia zebra eukaryotic peptide chain release factor subunit 1-like (LOC101472514), transcript variant X3, mRNA	NA	NA	NA	NA	NA
Unigene2234_All	2502	2.37	28.31	3.57835	1.11808e-144	1.31955e-142	Up	gi|405966262|gb|EKC31569.1|/4.58029e-50/Deleted in malignant brain tumors 1 protein [Crassostrea gigas]	gi|256096104|emb|CU856263.19|/7e-08/Pig DNA sequence from clone CH242-130P21 on chromosome X, complete sequence	sp|O88572|LRP6_MOUSE/5e-38/Low-density lipoprotein receptor-related protein 6 OS=Mus musculus GN=Lrp6 PE=1 SV=1	crg:105332379/2e-54/deleted in malignant brain tumors 1 protein-like; K13912 deleted in malignant brain tumors 1 protein	NA	PS51120/9.553/LDL-receptor class B (LDLRB) repeat profile.	NA
CL340.Contig5_All	1063	1.24	14.77	3.57426	3.0812e-32	7.53227e-31	Up	NA	NA	NA	NA	NA	NA	NA
Unigene31544_All	218	1.16	13.81	3.57352	6.37714e-06	3.87811e-05	Up	NA	NA	NA	NA	NA	NA	NA
Unigene7161_All	2512	2.16	25.67	3.57098	1.49484e-131	1.59559e-129	Up	gi|444727028|gb|ELW67537.1|/5.2756e-38/Cell surface glycoprotein 1 [Tupaia chinensis]	gi|380013100|ref|XM_003690560.1|/4e-06/PREDICTED: Apis florea WAS protein family homolog 1-like (LOC100872358), mRNA	sp|Q9JL04|FMN2_MOUSE/2e-28/Formin-2 OS=Mus musculus GN=Fmn2 PE=1 SV=2	fab:101811440/2e-30/FMN2; formin 2; K02184 formin 2	Rv3876/5e-25/---	NA	NA
Unigene36665_All	2449	0.4	4.75	3.56986	7.60046e-25	1.4621e-23	Up	gi|405978005|gb|EKC42423.1|/2.13306e-177/Protocadherin-11 X-linked [Crassostrea gigas]	NA	sp|Q6WXV7|PC11X_PONPY/7e-101/Protocadherin-11 X-linked OS=Pongo pygmaeus GN=PCDH11X PE=3 SV=1	crg:105328033/4e-178/protocadherin-11 Y-linked-like; K16498 protocadherin delta 1	NA	PS50268/27.693/Cadherins domain profile.	NA
CL4543.Contig2_All	1624	0.61	7.24	3.56911	7.60046e-25	1.46257e-23	Up	gi|260793814|ref|XP_002591905.1|/4.50678e-82/hypothetical protein BRAFLDRAFT_236936 [Branchiostoma floridae] &gt;gi|229277118|gb|EEN47916.1| hypothetical protein BRAFLDRAFT_236936 [Branchiostoma floridae]	NA	sp|Q96RW7|HMCN1_HUMAN/3e-76/Hemicentin-1 OS=Homo sapiens GN=HMCN1 PE=1 SV=2	acs:100555616/4e-78/hmcn1; hemicentin 1; K17341 hemicentin	NA	PS50940/8.408/Chitin-binding type-2 domain profile.	NA
Unigene42391_All	642	0.33	3.9	3.56294	6.37714e-06	3.87968e-05	Up	gi|405969886|gb|EKC34831.1|/1.56346e-16/hypothetical protein CGI_10022534 [Crassostrea gigas]	NA	NA	NA	NA	NA	NA
Unigene13888_All	1548	0.65	7.68	3.56259	4.13294e-25	8.0429e-24	Up	NA	NA	NA	NA	NA	NA	NA
CL3305.Contig1_All	599	0.24	2.83	3.5597	0.000157744	0.000776463	Up	NA	NA	NA	NA	NA	NA	NA
CL2499.Contig1_All	2003	5.97	70.17	3.55505	2.65962e-282	7.35763e-280	Up	gi|429142501|gb|AFZ76969.1|/1.46481e-64/interferon regulatory factor 2 [Pinctada fucata x Pinctada maculata]	gi|333906197|gb|JF412717.1|/3e-06/Hyriopsis cumingii interferon regulatory factor 2 (IRF-2) mRNA, complete cds	sp|P23906|IRF2_MOUSE/1e-38/Interferon regulatory factor 2 OS=Mus musculus GN=Irf2 PE=1 SV=1	crg:105343806/5e-59/interferon regulatory factor 1-like; K09444 interferon regulatory factor 1	NA	PR00267/9.2E-18/Interferon regulatory factor signature	NA
CL2640.Contig2_All	739	0.29	3.4	3.55141	6.37714e-06	3.88046e-05	Up	NA	NA	NA	NA	NA	NA	NA
Unigene32925_All	699	1.34	15.7	3.55046	3.34824e-22	5.80914e-21	Up	gi|528967376|ref|XP_005212286.1|/2.29724e-54/PREDICTED: calmodulin isoform X1 [Bos taurus]	gi|387598280|gb|JN091854.1|/3e-13/Ostrea edulis isolate M13F.13 calmodulin mRNA, partial cds	sp|Q95NR9|CALM_METSE/2e-55/Calmodulin OS=Metridium senile PE=1 SV=3	crg:105334733/1e-54/calmodulin; K02183 calmodulin	SPAC3A12.14/5e-45/---	PS50222/16.215/EF-hand calcium-binding domain profile.	molecular_function:GO:0005509//calcium ion binding;
Unigene38143_All	1229	0.41	4.8	3.54934	6.50462e-13	7.11298e-12	Up	gi|405976262|gb|EKC40775.1|/1.27722e-11/hypothetical protein CGI_10021266 [Crassostrea gigas]	NA	NA	NA	NA	NA	NA
Unigene38849_All	739	0.56	6.55	3.548	1.64732e-10	1.54193e-09	Up	gi|355687298|gb|EHH25882.1|/1.80155e-07/hypothetical protein EGK_15737, partial [Macaca mulatta]	gi|126215651|gb|AC192978.3|/4e-19/Pan troglodytes BAC clone CH251-600O19 from chromosome 7, complete sequence	NA	dmo:Dmoj_GI19140/8e-06/GI19140 gene product from transcript GI19140-RA; K15001 cytochrome P450, family 4 [EC:1.14.-.-]	NA	NA	NA
Unigene32816_All	1288	0.55	6.43	3.54732	1.06695e-17	1.51437e-16	Up	gi|405961671|gb|EKC27436.1|/1.95181e-50/hypothetical protein CGI_10025427 [Crassostrea gigas]	NA	sp|Q5JXM2|MET24_HUMAN/2e-11/Methyltransferase-like protein 24 OS=Homo sapiens GN=METTL24 PE=2 SV=1	bfo:BRAFLDRAFT_125902/7e-11/hypothetical protein; K12816 pre-mRNA-processing factor 17	NA	PTHR32026/2.0E-38/--	NA
Unigene32546_All	1442	0.49	5.72	3.54516	1.06695e-17	1.51472e-16	Up	NA	NA	NA	NA	NA	NA	NA
CL4615.Contig2_All	726	0.72	8.38	3.54088	1.19629e-12	1.28878e-11	Up	gi|405970446|gb|EKC35348.1|/5.02202e-71/Sodium- and chloride-dependent glycine transporter 2 [Crassostrea gigas]	NA	sp|P28573|SC6A7_RAT/6e-51/Sodium-dependent proline transporter OS=Rattus norvegicus GN=Slc6a7 PE=1 SV=2	crg:105334710/1e-71/sodium-dependent proline transporter-like; K05038 solute carrier family 6 (neurotransmitter transporter, amino acid) member 5/7/9/14	MA1518/3e-24/---	PF00209/7.5E-65/Sodium:neurotransmitter symporter family	NA
Unigene10612_All	1111	1.55	17.9	3.52962	3.855e-40	1.16711e-38	Up	gi|296035078|gb|ADG85257.1|/2.21135e-20/Fas ligand-like protein [Ostrea edulis]	NA	NA	crg:105344501/1e-06/tumor necrosis factor-like; K05473 tumor necrosis factor ligand superfamily member 11	NA	PS50049/13.515/TNF family profile.	NA
CL588.Contig2_All	1085	0.37	4.26	3.52526	3.03068e-10	2.77267e-09	Up	gi|405952762|gb|EKC20536.1|/1.03008e-43/Ubiquitin carboxyl-terminal hydrolase 27 [Crassostrea gigas]	NA	sp|P50876|R144A_HUMAN/1e-06/Probable E3 ubiquitin-protein ligase RNF144A OS=Homo sapiens GN=RNF144A PE=1 SV=2	aqu:100633511/5e-17/E3 ubiquitin-protein ligase RNF19A-like; K11972 E3 ubiquitin-protein ligase RNF19A [EC:2.3.2.27]	NA	NA	biological_process:GO:0044267//cellular protein metabolic process;
Unigene33955_All	653	0.32	3.67	3.51964	1.1784e-05	6.88901e-05	Up	NA	NA	NA	NA	NA	NA	NA
Unigene47229_All	521	0.41	4.7	3.51896	1.1784e-05	6.89035e-05	Up	NA	NA	NA	NA	NA	NA	NA
Unigene35305_All	345	0.66	7.53	3.51211	1.1784e-05	6.89235e-05	Up	NA	NA	NA	NA	NA	NA	NA
CL3640.Contig1_All	1003	0.3	3.42	3.51096	7.90592e-08	5.93466e-07	Up	gi|405964318|gb|EKC29816.1|/1.08545e-76/Cytochrome P450 2C8 [Crassostrea gigas]	NA	sp|P12789|CP2B5_RABIT/5e-58/Cytochrome P450 2B5 OS=Oryctolagus cuniculus GN=CYP2B5 PE=2 SV=1	crg:105333814/8e-64/cytochrome P450 2C14-like; K17854 cytochrome P450, family 2, subfamily K	alr4686/4e-19/---	PR01686/9.72E-6/CYP2D P450 family signature	NA
CL4237.Contig2_All	417	0.53	6.04	3.51048	1.1784e-05	6.88968e-05	Up	NA	NA	NA	NA	NA	NA	NA
Unigene45653_All	1645	0.67	7.63	3.50945	3.62172e-26	7.32457e-25	Up	gi|405965603|gb|EKC30966.1|/8.31919e-99/hypothetical protein CGI_10019766 [Crassostrea gigas]	NA	sp|A6NE01|F186A_HUMAN/2e-06/Protein FAM186A OS=Homo sapiens GN=FAM186A PE=2 SV=3	NA	NA	NA	NA
CL1819.Contig2_All	696	0.3	3.41	3.50674	2.17136e-05	0.000122509	Up	NA	NA	NA	NA	NA	NA	NA
Unigene37213_All	1392	0.22	2.5	3.50635	4.29492e-08	3.30887e-07	Up	gi|585650454|ref|XP_006814583.1|/7.8976e-93/PREDICTED: ATP-binding cassette sub-family A member 1-like, partial [Saccoglossus kowalevskii]	NA	sp|P14381|YTX2_XENLA/4e-60/Transposon TX1 uncharacterized 149 kDa protein OS=Xenopus laevis PE=4 SV=1	lcm:102367349/1e-30/uncharacterized LOC102367349; K04236 coagulation factor II (thrombin) receptor-like 3	NA	PS50878/12.77/Reverse transcriptase (RT) catalytic domain profile.	NA
Unigene31986_All	1582	0.44	5	3.50635	6.61136e-17	9.00447e-16	Up	gi|524917708|ref|XP_005113600.1|/1.35636e-99/PREDICTED: tigger transposable element-derived protein 6-like [Aplysia californica]	NA	sp|Q9Y4A0|JERKL_HUMAN/8e-15/Jerky protein homolog-like OS=Homo sapiens GN=JRKL PE=2 SV=2	hmg:100213942/3e-21/uncharacterized LOC100213942; K18932 palmitoyltransferase [EC:2.3.1.225]	NA	PF03184/2.7E-40/DDE superfamily endonuclease	NA
CL1830.Contig1_All	1569	0.14	1.59	3.50553	3.44206e-06	2.17206e-05	Up	gi|405966964|gb|EKC32184.1|/1.23896e-145/Putative oxidoreductase yteT [Crassostrea gigas]	gi|524886757|ref|XM_005099914.1|/2e-07/PREDICTED: Aplysia californica uncharacterized LOC101846820 (LOC101846820), transcript variant X2, mRNA	sp|Q9DBB8|DHDH_MOUSE/2e-06/Trans-1,2-dihydrobenzene-1,2-diol dehydrogenase OS=Mus musculus GN=Dhdh PE=2 SV=1	pxy:105397960/2e-08/uncharacterized LOC105397960; K00010 myo-inositol 2-dehydrogenase / D-chiro-inositol 1-dehydrogenase [EC:1.1.1.18 1.1.1.369]	DR1362/1e-67/---	PTHR22604:SF106/2.9E-171/--	NA
CL4757.Contig1_All	576	0.45	5.1	3.5025	9.95604e-07	6.66921e-06	Up	gi|449508849|ref|XP_002197108.2|/1.18893e-16/PREDICTED: nardilysin [Taeniopygia guttata]	NA	sp|Q8BHG1|NRDC_MOUSE/3e-14/Nardilysin OS=Mus musculus GN=Nrd1 PE=1 SV=1	crg:105319154/4e-20/nardilysin-like; K01411 nardilysin [EC:3.4.24.61]	NA	PTHR11851:SF108/1.0E-20/--	NA
Unigene35603_All	609	0.35	3.96	3.50007	1.1784e-05	6.89302e-05	Up	gi|556778419|ref|XP_005984282.1|/7.97763e-09/PREDICTED: dentin sialophosphoprotein [Pantholops hodgsonii]	NA	sp|Q9NZW4|DSPP_HUMAN/3e-06/Dentin sialophosphoprotein OS=Homo sapiens GN=DSPP PE=1 SV=2	dwi:Dwil_GK21555/3e-06/GK21555 gene product from transcript GK21555-RA; K09291 nucleoprotein TPR	NA	NA	NA
CL3059.Contig2_All	1436	0.32	3.61	3.49586	7.65022e-12	7.81717e-11	Up	NA	NA	NA	NA	NA	NA	NA
CL3373.Contig1_All	726	0.29	3.27	3.49517	1.1784e-05	6.89102e-05	Up	NA	NA	NA	NA	NA	NA	NA
CL2060.Contig2_All	964	0.5	5.62	3.49057	4.12428e-12	4.29284e-11	Up	NA	NA	NA	NA	NA	NA	NA
Unigene44417_All	815	0.38	4.27	3.49016	7.90592e-08	5.93392e-07	Up	gi|405965753|gb|EKC31107.1|/1.43289e-75/THAP domain-containing protein 4 [Crassostrea gigas]	NA	sp|Q8WY91|THAP4_HUMAN/8e-11/THAP domain-containing protein 4 OS=Homo sapiens GN=THAP4 PE=1 SV=2	bmor:101735999/1e-08/prominin-like protein; K06532 prominin 1	NA	SM00980/1.0E-9/--	NA
CL4225.Contig2_All	1242	0.73	8.2	3.48966	6.94794e-21	1.14423e-19	Up	gi|405952842|gb|EKC20604.1|/5.08264e-133/GDP-fucose protein O-fucosyltransferase 1 [Crassostrea gigas]	gi|585641980|ref|XM_002730321.2|/2e-06/PREDICTED: Saccoglossus kowalevskii GDP-fucose protein O-fucosyltransferase 1-like (LOC100368013), mRNA	sp|Q9V6X7|OFUT1_DROME/1e-113/GDP-fucose protein O-fucosyltransferase 1 OS=Drosophila melanogaster GN=O-fut1 PE=1 SV=1	crg:105327666/4e-133/GDP-fucose protein O-fucosyltransferase 1-like; K03691 peptide-O-fucosyltransferase [EC:2.4.1.221]	NA	PTHR21420/8.5E-211/--	NA
CL411.Contig2_All	501	0.4	4.49	3.48864	6.3916e-06	3.8826e-05	Up	gi|307213266|gb|EFN88744.1|/1.01562e-08/hypothetical protein EAI_13357 [Harpegnathos saltator]	gi|33667014|emb|AL935283.16|/8e-44/Zebrafish DNA sequence from clone CH211-247O1 in linkage group 7, complete sequence	NA	hro:HELRODRAFT_63155/1e-06/hypothetical protein; K03002 DNA-directed RNA polymerase I subunit RPA2 [EC:2.7.7.6]	NA	NA	NA
CL1934.Contig5_All	4636	0.23	2.58	3.48767	6.62112e-26	1.3244e-24	Up	gi|405954851|gb|EKC22176.1|/0/Intermediate filament tail domain-containing protein 1 [Crassostrea gigas]	gi|390350049|ref|XM_790982.3|/5e-07/PREDICTED: Strongylocentrotus purpuratus prelamin-A/C-like (LOC591420), mRNA	sp|Q9D4C1|ILFT1_MOUSE/2e-46/Intermediate filament tail domain-containing protein 1 OS=Mus musculus GN=Ifltd1 PE=2 SV=1	fab:101814189/1e-35/LMNB2; lamin B2; K07611 lamin B	aq_629/3e-09/---	PTHR23239:SF142/2.3E-67/--	NA
Unigene5729_All	1200	0.28	3.14	3.48727	1.26024e-08	1.01934e-07	Up	gi|405962528|gb|EKC28194.1|/2.0543e-83/Double-strand-break repair protein rad21-like protein [Crassostrea gigas]	gi|524893410|ref|XM_005103164.1|/6e-25/PREDICTED: Aplysia californica double-strand-break repair protein rad21 homolog (LOC101845018), transcript variant X3, mRNA	sp|Q61550|RAD21_MOUSE/1e-69/Double-strand-break repair protein rad21 homolog OS=Mus musculus GN=Rad21 PE=1 SV=3	crg:105337371/4e-84/double-strand-break repair protein rad21 homolog; K06670 cohesin complex subunit SCC1	NA	PTHR12585/3.2E-104/--	NA
Unigene8802_All	3383	1.77	19.84	3.48659	6.278e-135	6.90901e-133	Up	gi|405977593|gb|EKC42036.1|/3.40552e-67/Phosphoinositide 3-kinase adapter protein 1 [Crassostrea gigas]	NA	sp|Q9DDT2|BCAP_CHICK/3e-16/Phosphoinositide 3-kinase adapter protein 1 OS=Gallus gallus GN=PIK3AP1 PE=1 SV=1	crg:105348516/9e-68/phosphoinositide 3-kinase adapter protein 1-like; K12230 phosphoinositide 3-kinase adapter protein 1	NA	PS50297/8.587/Ankyrin repeat region circular profile.	NA
CL4112.Contig2_All	489	0.51	5.71	3.48492	1.85331e-06	1.20558e-05	Up	NA	NA	NA	NA	NA	NA	NA
CL4135.Contig2_All	1548	0.8	8.94	3.4822	1.52457e-28	3.34706e-27	Up	gi|405961433|gb|EKC27237.1|/1.01355e-83/Neuralized-like protein 1A [Crassostrea gigas]	NA	sp|A8MQ27|NEU1B_HUMAN/6e-12/E3 ubiquitin-protein ligase NEURL1B OS=Homo sapiens GN=NEURL1B PE=1 SV=1	cel:CELE_F10D7.5/5e-12/F10D7.5; Uncharacterized protein; K01931 protein neuralized [EC:2.3.2.27]	NA	PF13920/5.7E-16/Zinc finger, C3HC4 type (RING finger)	NA
Unigene7754_All	1243	0.49	5.47	3.48069	1.6218e-14	1.95185e-13	Up	NA	NA	NA	NA	NA	NA	NA
CL2503.Contig1_All	3782	0.27	3.01	3.47873	2.56558e-24	4.83516e-23	Up	gi|405976435|gb|EKC40941.1|/0/WD repeat-containing protein 64 [Crassostrea gigas]	gi|585692666|ref|XM_006821430.1|/4e-13/PREDICTED: Saccoglossus kowalevskii WD repeat-containing protein 64-like (LOC100370676), mRNA	sp|Q9D565|WDR64_MOUSE/4e-148/WD repeat-containing protein 64 OS=Mus musculus GN=Wdr64 PE=2 SV=2	hmg:100211326/1e-46/WD repeat-containing protein 64-like; K02988 small subunit ribosomal protein S5	MA2525/6e-09/---	SM00320/120.0/WD40 repeats	NA
CL3894.Contig2_All	6185	2.94	32.75	3.47761	0	0	Up	NA	gi|255098792|gb|FJ590509.1|/7e-07/Argopecten irradians manganese superoxide dismutase (MnSOD) gene, complete cds	NA	NA	NA	NA	NA
Unigene43954_All	2087	0.52	5.78	3.47449	4.07702e-25	7.93663e-24	Up	gi|405957680|gb|EKC23874.1|/2.01877e-157/Inter-alpha-trypsin inhibitor heavy chain H3 [Crassostrea gigas]	NA	sp|Q61704|ITIH3_MOUSE/2e-108/Inter-alpha-trypsin inhibitor heavy chain H3 OS=Mus musculus GN=Itih3 PE=1 SV=3	umr:103676256/6e-95/ITIH2; inter-alpha-trypsin inhibitor heavy chain 2; K19015 inter-alpha-trypsin inhibitor heavy chain H2	alr4412/6e-23/---	PS51468/32.817/VIT domain profile.	NA
CL2881.Contig2_All	1599	3.73	41.29	3.46854	3.2983e-130	3.49585e-128	Up	gi|405970811|gb|EKC35682.1|/5.10541e-70/Sushi repeat-containing protein SRPX2 [Crassostrea gigas]	NA	sp|Q70E20|SNED1_MOUSE/7e-16/Sushi, nidogen and EGF-like domain-containing protein 1 OS=Mus musculus GN=Sned1 PE=2 SV=2	spu:100890001/4e-23/sushi, von Willebrand factor type A, EGF and pentraxin domain-containing protein 1; K17495 CUB and sushi domain-containing protein	NA	SM00179/0.0013/Calcium-binding EGF-like domain	NA
Unigene31654_All	1677	1.07	11.84	3.46799	3.8119e-40	1.15464e-38	Up	NA	NA	NA	NA	NA	NA	NA
Unigene34919_All	1002	0.31	3.43	3.46787	7.90592e-08	5.93539e-07	Up	NA	NA	NA	NA	NA	NA	NA
CL2654.Contig1_All	1530	0.16	1.77	3.46761	9.95604e-07	6.66995e-06	Up	gi|123469906|ref|XP_001318162.1|/7.99092e-33/viral A-type inclusion protein [Trichomonas vaginalis G3]	NA	sp|O76329|ACTNB_DICDI/9e-24/Interaptin OS=Dictyostelium discoideum GN=abpD PE=1 SV=1	ola:101175647/8e-25/eea1; early endosome antigen 1; K12478 early endosome antigen 1	YHR023w/4e-17/---	NA	NA
CL448.Contig4_All	3882	0.73	8.07	3.4666	1.49961e-63	7.35273e-62	Up	gi|556946135|ref|XP_005986344.1|/9.7736e-66/PREDICTED: collagen alpha-1(II) chain isoform X3 [Latimeria chalumnae]	gi|190608797|gb|EU685275.1|/1e-07/Drosophila virilis coiled-coil Y protein (CCY) mRNA, complete cds	sp|P02458|CO2A1_HUMAN/5e-66/Collagen alpha-1(II) chain OS=Homo sapiens GN=COL2A1 PE=1 SV=3	lcm:102359526/2e-66/COL2A1; collagen, type II, alpha 1; K04520 amyloid beta A4 protein; K05719 integrin beta 1; K06236 collagen, type I/II/III/V/XI/XXIV/XXVII, alpha; K06256 CD44 antigen; K06257 syndecan 1; K06493 integrin beta 3	XF0818/1e-09/---	PS50068/12.463/LDL-receptor class A (LDLRA) domain profile.	NA
Unigene41227_All	2561	0.58	6.41	3.4662	8.01436e-34	2.05236e-32	Up	gi|556117008|gb|ESP05660.1|/2.96777e-129/hypothetical protein LOTGIDRAFT_203016 [Lottia gigantea]	NA	NA	NA	XF0221/1e-66/---	PF05960/3.4E-115/Bacterial protein of unknown function (DUF885)	NA
CL41.Contig1_All	2156	1.04	11.49	3.46572	2.1068e-50	8.11347e-49	Up	gi|556095140|gb|ESO83793.1|/2.41326e-28/hypothetical protein LOTGIDRAFT_98722, partial [Lottia gigantea]	NA	sp|Q6DFJ3|FUD1B_XENLA/3e-28/FUN14 domain-containing protein 1B OS=Xenopus laevis GN=fundc1-b PE=2 SV=1	crg:105317221/3e-30/FUN14 domain-containing protein 1-like; K17986 FUN14 domain-containing protein 1	NA	PTHR21346:SF2/5.9E-35/--	biological_process:GO:0006914//autophagy;cellular_component:GO:0016021//integral component of membrane;GO:0005741//mitochondrial outer membrane;
CL2427.Contig1_All	1783	0.43	4.75	3.46552	3.1486e-18	4.59772e-17	Up	gi|405962584|gb|EKC28247.1|/1.53811e-78/Tenascin-X [Crassostrea gigas]	NA	sp|Q9XWD6|CED1_CAEEL/3e-40/Cell death abnormality protein 1 OS=Caenorhabditis elegans GN=ced-1 PE=1 SV=1	crg:105333895/7e-60/uncharacterized LOC105333895; K18032 receptor-type tyrosine-protein phosphatase A [EC:3.1.3.48]	NA	SM00181/190.0/Epidermal growth factor-like domain.	NA
Unigene47816_All	1155	0.44	4.86	3.46538	4.03106e-12	4.20016e-11	Up	gi|405965378|gb|EKC30755.1|/4.83401e-58/Galactoside 2-alpha-L-fucosyltransferase 1 [Crassostrea gigas]	NA	sp|Q10980|FUT1_RAT/1e-26/Galactoside 2-alpha-L-fucosyltransferase 1 OS=Rattus norvegicus GN=Fut1 PE=2 SV=2	crg:105332175/1e-58/galactoside 2-alpha-L-fucosyltransferase 1-like; K00718 galactoside 2-L-fucosyltransferase 1/2 [EC:2.4.1.69]	NA	PTHR11927/5.2E-51/--	NA
CL728.Contig5_All	1949	0.86	9.49	3.464	2.68572e-38	7.77209e-37	Up	NA	NA	NA	NA	NA	NA	NA
Unigene31848_All	1284	0.31	3.42	3.46366	1.02095e-09	9.00696e-09	Up	gi|405971192|gb|EKC36042.1|/1.19377e-07/hypothetical protein CGI_10022433 [Crassostrea gigas]	NA	NA	NA	NA	NA	NA
CL2256.Contig3_All	2152	1.1	12.13	3.463	2.69874e-53	1.10418e-51	Up	gi|405963608|gb|EKC29170.1|/6.99203e-122/Heat shock 70 kDa protein 12B [Crassostrea gigas]	NA	sp|Q8K0U4|HS12A_MOUSE/2e-75/Heat shock 70 kDa protein 12A OS=Mus musculus GN=Hspa12a PE=1 SV=1	aqu:100633272/5e-33/uncharacterized LOC100633272; K10380 ankyrin	BB0264/4e-10/---	PF00012/2.0E-11/Hsp70 protein	NA
CL5328.Contig2_All	871	0.41	4.52	3.46263	6.8081e-09	5.61904e-08	Up	NA	NA	NA	NA	NA	NA	NA
CL493.Contig2_All	987	4.32	47.53	3.45974	4.0623e-91	2.88223e-89	Up	gi|167525968|ref|XP_001747318.1|/1.23651e-08/hypothetical protein [Monosiga brevicollis MX1] &gt;gi|163774153|gb|EDQ87785.1| predicted protein [Monosiga brevicollis MX1]	gi|374428414|emb|FQ310506.3|/5e-28/Dicentrarchus labrax chromosome sequence corresponding to linkage group 1, top part, complete sequence	sp|Q02722|Q300_MOUSE/8e-06/Protein Q300 OS=Mus musculus GN=Hpvc2 PE=4 SV=1	dre:100331906/6e-08/si:ch73-40a17.1; K16340 PH domain and leucine-rich repeat-containing protein phosphatase [EC:3.1.3.16]	NA	NA	biological_process:GO:0008152//metabolic process;cellular_component:GO:0016020//membrane;
CL438.Contig1_All	672	0.23	2.53	3.45943	0.000157744	0.000777097	Up	NA	NA	NA	NA	NA	NA	NA
Unigene9640_All	524	0.61	6.7	3.45728	1.45229e-07	1.06305e-06	Up	NA	NA	NA	NA	NA	NA	NA
CL1873.Contig4_All	3020	27.66	303.62	3.45639	0	0	Up	NA	gi|255098792|gb|FJ590509.1|/3e-26/Argopecten irradians manganese superoxide dismutase (MnSOD) gene, complete cds	NA	NA	NA	NA	NA
CL1907.Contig1_All	3097	8.68	95.17	3.45474	0	0	Up	gi|524888334|ref|XP_005100739.1|/6.49432e-150/PREDICTED: basic leucine zipper and W2 domain-containing protein 1-like [Aplysia californica]	gi|524888333|ref|XM_005100682.1|/2e-14/PREDICTED: Aplysia californica basic leucine zipper and W2 domain-containing protein 1-like (LOC101846510), mRNA	sp|Q6P2Z0|BZW1_XENTR/4e-137/Basic leucine zipper and W2 domain-containing protein 1 OS=Xenopus tropicalis GN=bzw1 PE=2 SV=1	xtr:100487780/5e-09/eif2b5; eukaryotic translation initiation factor 2B, subunit 5 epsilon, 82kDa; K03240 translation initiation factor eIF-2B subunit epsilon	SPAC8C9.15c/1e-06/---	PTHR14208/1.9E-228/--	NA
Unigene45917_All	368	0.61	6.68	3.45297	2.17136e-05	0.00012259	Up	NA	NA	NA	NA	NA	NA	NA
CL2553.Contig2_All	2008	0.44	4.81	3.45046	7.03924e-21	1.15895e-19	Up	gi|405959507|gb|EKC25537.1|/4.62421e-26/hypothetical protein CGI_10009209 [Crassostrea gigas]	NA	NA	NA	NA	NA	NA
CL132.Contig1_All	3480	4.54	49.58	3.44899	0	0	Up	gi|405975491|gb|EKC40052.1|/4.33924e-33/Pancreatic secretory granule membrane major glycoprotein GP2 [Crassostrea gigas]	NA	sp|Q5R5C1|UROM_PONAB/2e-15/Uromodulin OS=Pongo abelii GN=UMOD PE=2 SV=1	hgl:101709895/2e-14/Umod; uromodulin; K18274 uromodulin	NA	PTHR22962:SF129/9.6E-31/--	NA
CL1848.Contig3_All	503	1.6	17.42	3.4446	3.60278e-17	4.98112e-16	Up	NA	NA	NA	NA	NA	NA	NA
Unigene45072_All	606	0.35	3.81	3.44436	2.17136e-05	0.000122613	Up	gi|524867908|ref|XP_005090761.1|/1.47424e-87/PREDICTED: echinoderm microtubule-associated protein-like 6-like [Aplysia californica]	gi|541989802|ref|XM_005445623.1|/6e-08/PREDICTED: Falco cherrug echinoderm microtubule associated protein like 6 (EML6), mRNA	sp|Q6ED65|EMAL5_RAT/2e-73/Echinoderm microtubule-associated protein-like 5 OS=Rattus norvegicus GN=Eml5 PE=1 SV=2	crg:105337004/6e-88/echinoderm microtubule-associated protein-like 6; K18598 echinoderm microtubule-associated protein-like 6	all0664/9e-07/---	PF00400/6.4E-5/WD domain, G-beta repeat	molecular_function:GO:0003824//catalytic activity;
Unigene32869_All	678	0.31	3.37	3.44241	2.17136e-05	0.000122498	Up	gi|405962141|gb|EKC27843.1|/4.45723e-60/Ceramide kinase [Crassostrea gigas]	NA	sp|Q8TCT0|CERK1_HUMAN/2e-46/Ceramide kinase OS=Homo sapiens GN=CERK PE=1 SV=1	crg:105322453/1e-60/ceramide kinase-like; K04715 ceramide kinase [EC:2.7.1.138]	SPAC4A8.07c/6e-21/---	PF00781/8.2E-23/Diacylglycerol kinase catalytic domain	NA
CL2502.Contig1_All	1114	0.54	5.87	3.44233	1.64055e-14	1.97364e-13	Up	gi|405951464|gb|EKC19374.1|/3.86612e-65/hypothetical protein CGI_10008698 [Crassostrea gigas]	NA	sp|P58505|CU058_HUMAN/6e-15/Uncharacterized protein C21orf58 OS=Homo sapiens GN=C21orf58 PE=2 SV=2	NA	NA	PF15248/1.7E-16/Domain of unknown function (DUF4587)	NA
Unigene31363_All	746	0.28	3.04	3.44057	2.17136e-05	0.000122544	Up	NA	NA	NA	NA	NA	NA	NA
Unigene865_All	582	0.55	5.97	3.44023	1.45229e-07	1.0628e-06	Up	NA	NA	NA	NA	NA	NA	NA
CL603.Contig3_All	1754	0.36	3.9	3.43741	8.839e-15	1.08258e-13	Up	gi|405962700|gb|EKC28351.1|/4.09539e-84/Monocarboxylate transporter 12 [Crassostrea gigas]	NA	sp|Q8BGC3|MOT12_MOUSE/4e-52/Monocarboxylate transporter 12 OS=Mus musculus GN=Slc16a12 PE=2 SV=1	crg:105324895/8e-85/monocarboxylate transporter 12-like; K11810 MFS transporter, MCP family, solute carrier family 16 (monocarboxylic acid transporters), member 12	AF0367/2e-20/---	PS50850/10.718/Major facilitator superfamily (MFS) profile.	NA
Unigene32910_All	485	0.45	4.87	3.43592	2.17136e-05	0.000122521	Up	NA	NA	NA	NA	NA	NA	NA
Unigene45235_All	1222	0.25	2.7	3.43296	1.45229e-07	1.06267e-06	Up	gi|405960053|gb|EKC26005.1|/3.43451e-142/Frizzled-10-A [Crassostrea gigas]	NA	sp|Q8BKG4|FZD10_MOUSE/3e-94/Frizzled-10 OS=Mus musculus GN=Fzd10 PE=2 SV=1	crg:105348550/7e-143/frizzled-9-like; K02842 frizzled 9/10	NA	PF01534/2.1E-49/Frizzled/Smoothened family membrane region	NA
Unigene40693_All	725	0.29	3.13	3.43204	2.17136e-05	0.000122578	Up	NA	NA	NA	NA	NA	NA	NA
Unigene34001_All	917	0.37	3.99	3.43079	2.32866e-08	1.84324e-07	Up	gi|524896966|ref|XP_005104952.1|/4.51228e-14/PREDICTED: low-density lipoprotein receptor-related protein 2-like [Aplysia californica]	NA	sp|P98164|LRP2_HUMAN/3e-06/Low-density lipoprotein receptor-related protein 2 OS=Homo sapiens GN=LRP2 PE=1 SV=3	crg:105320898/2e-13/low-density lipoprotein receptor-related protein 2-like; K06233 low density lipoprotein-related protein 2	NA	NA	NA
Unigene3300_All	1846	0.97	10.45	3.42937	7.74134e-39	2.26633e-37	Up	gi|405965368|gb|EKC30746.1|/8.11525e-14/Tripartite motif-containing protein 3 [Crassostrea gigas]	NA	sp|Q99PQ1|TR12A_MOUSE/2e-06/Tripartite motif-containing protein 12A OS=Mus musculus GN=Trim12a PE=2 SV=1	crg:105337113/1e-16/uncharacterized LOC105337113; K11997 tripartite motif-containing protein 2/3	NA	PTHR24103:SF208/8.3E-14/--	NA
CL3308.Contig3_All	4397	1.49	16.04	3.42829	6.16202e-140	7.09197e-138	Up	gi|405962655|gb|EKC28312.1|/0/Semaphorin-1A [Crassostrea gigas]	NA	sp|Q26473|SEM1A_SCHAM/4e-142/Semaphorin-1A OS=Schistocerca americana GN=SEMA-1A PE=1 SV=1	crg:105345498/0.0/semaphorin-1A-like; K06756 neuronal cell adhesion molecule; K06820 plexin A; K06842 semaphorin 6	NA	SM00630/4.5E-141/semaphorin domain	NA
Unigene44255_All	985	0.41	4.41	3.42708	1.86919e-09	1.61894e-08	Up	gi|524916355|ref|XP_005112956.1|/5.21317e-92/PREDICTED: uncharacterized protein LOC101859460 [Aplysia californica]	NA	NA	NA	PH0757/5e-15/---	PF02900/8.6E-13/Catalytic LigB subunit of aromatic ring-opening dioxygenase	NA
CL4802.Contig1_All	548	0.39	4.19	3.4254	3.98886e-05	0.000216877	Up	gi|556093682|gb|ESO82335.1|/2.1302e-06/hypothetical protein LOTGIDRAFT_170115 [Lottia gigantea]	NA	NA	NA	NA	NA	NA
CL1938.Contig2_All	612	0.35	3.76	3.42531	2.17136e-05	0.000122532	Up	NA	NA	NA	NA	NA	NA	NA
Unigene11703_All	1767	0.39	4.18	3.42196	1.35586e-15	1.7324e-14	Up	gi|556093752|gb|ESO82405.1|/3.12916e-15/hypothetical protein LOTGIDRAFT_237010 [Lottia gigantea]	NA	NA	NA	NA	NA	NA
Unigene3993_All	1886	1.16	12.42	3.42047	9.74142e-47	3.42358e-45	Up	gi|470250474|ref|XP_004358334.1|/3.37784e-23/3&apos;-5&apos; exonuclease domain-containing protein [Dictyostelium fasciculatum] &gt;gi|328872117|gb|EGG20484.1| 3&apos;-5&apos; exonuclease domain-containing protein [Dictyostelium fasciculatum]	NA	sp|Q8CDF7|EXD1_MOUSE/2e-21/Exonuclease 3'-5' domain-containing protein 1 OS=Mus musculus GN=Exd1 PE=2 SV=1	acs:100564959/3e-23/exd1; exonuclease 3'-5' domain containing 1; K18740 exonuclease 3'-5' domain-containing protein 1	NA	PTHR12124/1.6E-49/--	NA
Unigene16295_All	627	0.67	7.17	3.41974	1.86919e-09	1.61941e-08	Up	NA	NA	NA	NA	NA	NA	NA
CL590.Contig2_All	578	8.94	95.62	3.41897	2.27844e-101	1.79854e-99	Up	gi|405962640|gb|EKC28297.1|/9.12447e-09/hypothetical protein CGI_10021602 [Crassostrea gigas]	NA	NA	NA	NA	NA	NA
Unigene31941_All	909	0.45	4.81	3.41804	1.86919e-09	1.61918e-08	Up	NA	gi|548341694|ref|XM_005723309.1|/2e-06/PREDICTED: Pundamilia nyererei matrix-remodeling-associated protein 5-like (LOC102192837), mRNA	NA	NA	NA	NA	NA
CL1686.Contig2_All	887	1.25	13.35	3.41684	4.70916e-24	8.78441e-23	Up	gi|405968720|gb|EKC33766.1|/8.44513e-11/hypothetical protein CGI_10023300 [Crassostrea gigas]	NA	NA	NA	NA	PF02221/2.3E-9/ML domain	NA
Unigene42670_All	1045	0.29	3.09	3.41348	2.66202e-07	1.90147e-06	Up	gi|556110742|gb|ESO99393.1|/8.96682e-53/hypothetical protein LOTGIDRAFT_231057 [Lottia gigantea]	NA	NA	lve:103084674/4e-06/SFI1; Sfi1 homolog, spindle assembly associated (yeast); K16489 protein SFI1	NA	NA	NA
Unigene1398_All	680	1.39	14.8	3.41244	7.75364e-20	1.22027e-18	Up	NA	NA	NA	NA	NA	NA	NA
Unigene32525_All	679	0.46	4.89	3.41013	2.66202e-07	1.90034e-06	Up	NA	gi|222355231|gb|FJ014707.1|/8e-20/Argopecten irradians cytoplasmic copper/zinc superoxide dismutase gene, complete cds	NA	NA	NA	NA	NA
CL5190.Contig1_All	1634	1.32	14.03	3.40991	1.11961e-45	3.83645e-44	Up	gi|584030011|ref|XP_006809500.1|/1.54379e-13/PREDICTED: hemicentin-1-like [Neolamprologus brichardi]	NA	sp|Q1WIM2|CADM2_RAT/1e-11/Cell adhesion molecule 2 OS=Rattus norvegicus GN=Cadm2 PE=1 SV=2	xma:102226041/6e-13/cell adhesion molecule 4-like; K06780 cell adhesion molecule 3; K06782 cell adhesion molecule 2; K06783 cell adhesion molecule 4	NA	PF13895/9.0E-4/Immunoglobulin domain	NA
Unigene45766_All	2040	0.29	3.08	3.40881	1.81734e-13	2.0559e-12	Up	gi|405965880|gb|EKC31226.1|/0/hypothetical protein CGI_10007118 [Crassostrea gigas]	NA	NA	NA	NA	PTHR16897/2.7E-39/--	NA
CL1178.Contig1_All	1794	0.34	3.61	3.40839	9.95046e-14	1.14325e-12	Up	gi|405971192|gb|EKC36042.1|/1.57353e-30/hypothetical protein CGI_10022433 [Crassostrea gigas]	NA	NA	NA	NA	NA	NA
CL4605.Contig2_All	2250	0.31	3.29	3.40775	1.35586e-15	1.73203e-14	Up	gi|405974232|gb|EKC38892.1|/2.90184e-40/Sperm flagellar protein 1 [Crassostrea gigas]	NA	sp|Q9Y4P9|SPEF1_HUMAN/1e-34/Sperm flagellar protein 1 OS=Homo sapiens GN=SPEF1 PE=1 SV=3	NA	NA	PTHR12509/9.0E-42/--	NA
CL240.Contig1_All	896	0.4	4.24	3.40599	1.26024e-08	1.0188e-07	Up	NA	NA	NA	NA	NA	NA	NA
CL2905.Contig2_All	1559	1.41	14.92	3.40348	5.89166e-46	2.03153e-44	Up	gi|556109066|gb|ESO97718.1|/2.62233e-55/hypothetical protein LOTGIDRAFT_181676 [Lottia gigantea]	gi|323510943|gb|HQ225752.1|/3e-06/Argopecten irradians clone AiDD105 microsatellite sequence	sp|P18503|CAS4_EPHMU/2e-09/Short-chain collagen C4 (Fragment) OS=Ephydatia muelleri PE=2 SV=1	aqu:100631883/2e-31/N-acetylated-alpha-linked acidic dipeptidase 2-like; K01301 N-acetylated-alpha-linked acidic dipeptidase [EC:3.4.17.21]	NA	PTHR24024/6.0E-57/--	NA
CL2413.Contig1_All	485	0.67	7.08	3.40152	2.66202e-07	1.90079e-06	Up	NA	NA	NA	NA	NA	NA	NA
CL3580.Contig1_All	1280	0.76	8.03	3.40133	2.07014e-21	3.47373e-20	Up	gi|524899572|ref|XP_005106215.1|/4.20175e-29/PREDICTED: putative IQ motif and ankyrin repeat domain-containing protein LOC642574-like [Aplysia californica]	NA	sp|A8MXQ7|YH010_HUMAN/2e-09/Putative IQ motif and ankyrin repeat domain-containing protein LOC642574 OS=Homo sapiens PE=5 SV=2	NA	NA	PTHR24193:SF74/8.6E-20/--	NA
Unigene32777_All	815	0.25	2.64	3.40054	3.98886e-05	0.000216799	Up	gi|405953937|gb|EKC21500.1|/2.56929e-133/Cytoplasmic dynein 2 heavy chain 1 [Crassostrea gigas]	gi|524915420|ref|XM_005112453.1|/3e-26/PREDICTED: Aplysia californica cytoplasmic dynein 2 heavy chain 1-like (LOC101859067), mRNA	sp|Q27802|DYHC2_TRIGR/2e-117/Cytoplasmic dynein 2 heavy chain 1 OS=Tripneustes gratilla GN=DYH1B PE=2 SV=2	crg:105330477/5e-134/cytoplasmic dynein 2 heavy chain 1-like; K10414 dynein heavy chain 2, cytosolic	YKR054c/7e-28/---	PTHR10676/2.1E-157/--	NA
Unigene32907_All	633	0.5	5.28	3.40054	2.66202e-07	1.89989e-06	Up	NA	NA	NA	NA	NA	NA	NA
Unigene45274_All	611	0.52	5.49	3.40022	2.66202e-07	1.90102e-06	Up	NA	NA	NA	NA	NA	NA	NA
Unigene45107_All	598	0.35	3.69	3.39819	3.98886e-05	0.000216779	Up	NA	NA	NA	NA	NA	NA	NA
Unigene5664_All	1053	1.08	11.38	3.3974	4.5428e-24	8.48196e-23	Up	NA	NA	NA	NA	NA	NA	NA
Unigene4432_All	5760	1.42	14.96	3.39715	7.18954e-170	1.0299e-167	Up	gi|405966454|gb|EKC31738.1|/4.84715e-40/hypothetical protein CGI_10008997 [Crassostrea gigas]	gi|632951022|ref|XM_007892875.1|/4e-08/PREDICTED: Callorhinchus milii adenylate kinase 9 (ak9), mRNA	sp|Q69ZU8|ANKR6_MOUSE/6e-11/Ankyrin repeat domain-containing protein 6 OS=Mus musculus GN=Ankrd6 PE=1 SV=2	aag:AaeL_AAEL014668/5e-11/AAEL014668-PA; K15503 serine/threonine-protein phosphatase 6 regulatory ankyrin repeat subunit B	all2748/6e-10/---	PS50297/30.396/Ankyrin repeat region circular profile.	NA
CL668.Contig3_All	3346	0.23	2.42	3.3953	1.06695e-17	1.51508e-16	Up	gi|405970214|gb|EKC35142.1|/3.88236e-148/Ataxin-2 [Crassostrea gigas]	NA	sp|Q8WWM7|ATX2L_HUMAN/1e-61/Ataxin-2-like protein OS=Homo sapiens GN=ATXN2L PE=1 SV=2	api:100165557/2e-20/trithorax group protein osa-like; K11653 AT-rich interactive domain-containing protein 1	SPBC21B10.03c/2e-16/---	PF14438/1.0E-17/Ataxin 2 SM domain	NA
CL57.Contig2_All	2422	0.94	9.89	3.39524	8.43864e-48	3.04376e-46	Up	gi|405955210|gb|EKC22413.1|/6.33965e-57/hypothetical protein CGI_10002331 [Crassostrea gigas]	NA	sp|P12844|MYO3_CAEEL/1e-11/Myosin-3 OS=Caenorhabditis elegans GN=myo-3 PE=2 SV=1	lcm:102353984/1e-13/CENPF; centromere protein F, 350/400kDa; K11499 centromere protein F	aq_1006/4e-12/---	NA	NA
Unigene32061_All	764	0.41	4.31	3.39399	2.66202e-07	1.90057e-06	Up	NA	NA	NA	NA	NA	NA	NA
Unigene14878_All	924	21.62	227.12	3.39302	0	0	Up	gi|524910572|ref|XP_005110162.1|/2.71076e-07/PREDICTED: TATA-binding protein-associated factor 2N-like [Aplysia californica]	NA	NA	NA	NA	NA	NA
Unigene21563_All	1411	2.26	23.74	3.39293	1.15417e-65	5.86401e-64	Up	gi|585722101|ref|XP_006813392.1|/1.04714e-34/PREDICTED: uncharacterized protein LOC102810040 [Saccoglossus kowalevskii]	NA	NA	pxy:105395227/2e-12/116 kDa U5 small nuclear ribonucleoprotein component-like; K12852 116 kDa U5 small nuclear ribonucleoprotein component	NA	PS50878/14.595/Reverse transcriptase (RT) catalytic domain profile.	NA
Unigene47606_All	850	0.48	5.04	3.39232	3.41614e-09	2.89314e-08	Up	gi|405963463|gb|EKC29033.1|/6.08764e-40/Thrombospondin-1, partial [Crassostrea gigas]	NA	sp|Q95116|TSP2_BOVIN/2e-22/Thrombospondin-2 OS=Bos taurus GN=THBS2 PE=2 SV=2	cmk:103175202/8e-22/thbs1; thrombospondin 1; K05719 integrin beta 1; K16857 thrombospondin 1	NA	PS50092/8.532/Thrombospondin type-1 (TSP1) repeat profile.	NA
Unigene35124_All	557	0.38	3.99	3.39232	3.98886e-05	0.000216721	Up	NA	NA	NA	NA	NA	NA	NA
Unigene37897_All	1558	0.26	2.73	3.39232	1.86919e-09	1.61871e-08	Up	gi|260813149|ref|XP_002601281.1|/1.1043e-45/hypothetical protein BRAFLDRAFT_81321 [Branchiostoma floridae] &gt;gi|229286575|gb|EEN57293.1| hypothetical protein BRAFLDRAFT_81321 [Branchiostoma floridae]	NA	sp|Q7YU24|MARF_DROME/9e-08/Transmembrane GTPase Marf OS=Drosophila melanogaster GN=Marf PE=1 SV=1	crg:105333658/2e-25/uncharacterized LOC105333658; K06030 mitofusin [EC:3.6.5.-]	all4414/2e-14/---	PTHR26392/4.9E-35/--	NA
CL214.Contig2_All	1102	0.38	3.99	3.39232	1.86919e-09	1.61848e-08	Up	NA	NA	NA	NA	NA	NA	NA
Unigene31403_All	409	3.25	34.11	3.39168	2.11952e-25	4.1718e-24	Up	NA	NA	NA	NA	NA	NA	NA
Unigene14343_All	1067	4.95	51.88	3.38968	4.43392e-105	3.69849e-103	Up	gi|40806077|gb|AAR92030.1|/1.50618e-103/peptidoglycan recognition protein [Argopecten irradians]	gi|40806076|gb|AY437875.1|/0.0/Argopecten irradians peptidoglycan recognition protein mRNA, complete cds	sp|O76537|PGRP_TRINI/1e-40/Peptidoglycan recognition protein OS=Trichoplusia ni GN=PGRP PE=1 SV=1	lcm:102360627/2e-43/peptidoglycan recognition protein 1-like; K01446 N-acetylmuramoyl-L-alanine amidase [EC:3.5.1.28]	Rv3811/2e-12/---	SM00644/3.2E-17/--	NA
CL408.Contig2_All	578	0.4	4.19	3.38888	1.1784e-05	6.89169e-05	Up	NA	NA	NA	NA	NA	NA	NA
Unigene31661_All	323	0.71	7.43	3.38747	3.98886e-05	0.000216701	Up	NA	NA	NA	NA	NA	NA	NA
Unigene9884_All	1607	1.45	15.16	3.38614	4.63458e-48	1.6868e-46	Up	NA	NA	NA	NA	NA	NA	NA
Unigene46880_All	2316	0.55	5.75	3.38606	5.42836e-27	1.13711e-25	Up	gi|260814726|ref|XP_002602065.1|/0/hypothetical protein BRAFLDRAFT_228268 [Branchiostoma floridae] &gt;gi|229287370|gb|EEN58077.1| hypothetical protein BRAFLDRAFT_228268 [Branchiostoma floridae]	gi|569000641|ref|XM_006524444.1|/2e-08/PREDICTED: Mus musculus acyl-CoA synthetase bubblegum family member 2 (Acsbg2), transcript variant X2, mRNA	sp|Q7ZYC4|ACBG2_XENLA/0.0/Long-chain-fatty-acid--CoA ligase ACSBG2 OS=Xenopus laevis GN=acsbg2 PE=2 SV=1	crg:105336774/0.0/long-chain-fatty-acid--CoA ligase ACSBG2-like; K15013 long-chain-fatty-acid--CoA ligase ACSBG [EC:6.2.1.3]	AF0200/6e-62/---	PF00501/5.8E-87/AMP-binding enzyme	NA
Unigene37793_All	823	0.25	2.61	3.38405	3.98886e-05	0.000216819	Up	gi|390368848|ref|XP_003731539.1|/7.08714e-22/PREDICTED: uncharacterized protein LOC100892005 [Strongylocentrotus purpuratus]	NA	NA	spu:582280/3e-22/exosome complex exonuclease RRP44; K12585 exosome complex exonuclease DIS3/RRP44 [EC:3.1.13.-]	NA	NA	NA
Unigene32393_All	547	0.39	4.07	3.38348	3.98886e-05	0.000216643	Up	NA	NA	NA	NA	NA	PS50095/9.957/PLAT domain profile.	NA
Unigene43577_All	742	0.28	2.92	3.38247	3.98886e-05	0.000216662	Up	NA	NA	NA	NA	NA	NA	NA
Unigene5686_All	1964	0.61	6.36	3.38215	2.11952e-25	4.17316e-24	Up	NA	NA	NA	NA	NA	NA	NA
Unigene32122_All	464	0.47	4.89	3.3791	3.98886e-05	0.000216838	Up	gi|545528975|ref|XP_005630886.1|/9.39485e-08/PREDICTED: filaggrin isoform X2 [Canis lupus familiaris]	NA	NA	NA	NA	NA	NA
Unigene43424_All	561	0.38	3.95	3.37778	3.98886e-05	0.000216682	Up	NA	NA	NA	NA	NA	NA	NA
Unigene44715_All	478	0.91	9.45	3.37638	3.41614e-09	2.89273e-08	Up	NA	gi|61657047|emb|CR925797.8|/4e-21/Zebrafish DNA sequence from clone CH211-194I8 in linkage group 13, complete sequence	NA	NA	NA	NA	NA
CL5141.Contig1_All	375	0.6	6.23	3.3762	3.98886e-05	0.000216897	Up	gi|348517990|ref|XP_003446515.1|/1.46787e-08/PREDICTED: uncharacterized protein LOC100699745 [Oreochromis niloticus]	NA	sp|Q9I929|FUCL3_ANGJA/7e-06/Fucolectin-3 OS=Anguilla japonica PE=2 SV=1	crg:105343558/1e-06/receptor-type tyrosine-protein phosphatase S-like; K06776 receptor-type tyrosine-protein phosphatase kappa [EC:3.1.3.48]	NA	PTHR19277/2.6E-12/--	NA
Unigene39471_All	1618	0.56	5.81	3.37504	2.57748e-19	3.96133e-18	Up	gi|405963254|gb|EKC28845.1|/1.72019e-57/hypothetical protein CGI_10019073 [Crassostrea gigas]	NA	NA	NA	NA	NA	NA
CL3541.Contig1_All	3829	0.56	5.81	3.37504	3.72836e-45	1.26462e-43	Up	gi|405968618|gb|EKC33674.1|/0/Integrin-linked protein kinase [Crassostrea gigas]	gi|524895698|ref|XM_005104274.1|/1e-16/PREDICTED: Aplysia californica integrin-linked protein kinase-like (LOC101846441), mRNA	sp|Q13418|ILK_HUMAN/7e-175/Integrin-linked protein kinase OS=Homo sapiens GN=ILK PE=1 SV=2	crg:105340380/0.0/integrin-linked protein kinase-like; K06272 integrin-linked kinase [EC:2.7.11.1]	all2748/3e-10/---	SM00248/1.7E-4/ankyrin repeats	biological_process:GO:0016043//cellular component organization;GO:0006355//regulation of transcription, DNA-templated;GO:0042127//regulation of cell proliferation;GO:0007166//cell surface receptor signaling pathway;GO:0031325//positive regulation of cellular metabolic process;GO:0098602//single organism cell adhesion;GO:0009887//organ morphogenesis;GO:0009967//positive regulation of signal transd…
CL4656.Contig2_All	851	0.6	6.22	3.37388	8.2009e-11	7.84674e-10	Up	NA	NA	NA	NA	NA	NA	NA
Unigene32336_All	591	0.36	3.73	3.37311	3.98886e-05	0.00021676	Up	NA	NA	NA	NA	NA	NA	NA
Unigene34946_All	434	0.51	5.27	3.36923	3.98886e-05	0.00021674	Up	gi|405973841|gb|EKC38531.1|/1.57459e-47/hypothetical protein CGI_10017088 [Crassostrea gigas]	NA	NA	NA	NA	PTHR16201:SF39/4.2E-24/--	NA
Unigene44124_All	721	0.43	4.44	3.36815	4.86826e-07	3.38204e-06	Up	NA	NA	NA	NA	NA	NA	NA
Unigene43351_All	1652	0.91	9.39	3.36719	5.95358e-31	1.40583e-29	Up	gi|405950258|gb|EKC18257.1|/2.03584e-146/Alkaline phosphatase, tissue-nonspecific isozyme [Crassostrea gigas]	NA	sp|P09487|PPBT_BOVIN/7e-125/Alkaline phosphatase, tissue-nonspecific isozyme OS=Bos taurus GN=ALPL PE=1 SV=2	crg:105318059/1e-147/alkaline phosphatase, tissue-nonspecific isozyme-like; K01077 alkaline phosphatase [EC:3.1.3.1]	XF0657/1e-96/---	PS00123/-/Alkaline phosphatase active site.	NA
Unigene6428_All	630	2.17	22.38	3.36644	9.8713e-27	2.04999e-25	Up	NA	NA	NA	NA	NA	NA	NA
CL2270.Contig1_All	2855	0.26	2.68	3.36565	2.22002e-16	2.95944e-15	Up	gi|405978602|gb|EKC42980.1|/4.24802e-31/Calcium-binding protein NCS-1 [Crassostrea gigas]	NA	sp|Q16982|NECX_APLCA/6e-26/Neurocalcin OS=Aplysia californica PE=2 SV=2	cmy:102932018/3e-23/NCALD; neurocalcin delta; K19695 neurocalcin delta	SPAC18B11.04/1e-22/---	PS00018/-/EF-hand calcium-binding domain.	NA
CL2952.Contig2_All	4089	5.86	60.34	3.36414	0	0	Up	gi|405978569|gb|EKC42949.1|/3.39122e-08/Tripartite motif-containing protein 45 [Crassostrea gigas]	NA	NA	crg:105336110/7e-09/tripartite motif-containing protein 45-like; K11997 tripartite motif-containing protein 2/3	NA	PS50119/9.997/Zinc finger B-box type profile.	NA
CL268.Contig1_All	1361	0.81	8.34	3.36405	9.1068e-23	1.61771e-21	Up	NA	NA	NA	NA	NA	NA	NA
Unigene35819_All	708	0.44	4.53	3.36394	4.86826e-07	3.38165e-06	Up	NA	NA	NA	NA	NA	NA	NA
Unigene41823_All	567	0.38	3.91	3.3631	3.98886e-05	0.000216858	Up	NA	NA	NA	NA	NA	NA	NA
CL4863.Contig2_All	611	0.35	3.6	3.36257	3.98886e-05	0.000216916	Up	NA	NA	NA	NA	NA	NA	NA
Unigene31630_All	1340	0.6	6.17	3.36224	6.18144e-17	8.43417e-16	Up	NA	NA	NA	NA	NA	NA	NA
CL2079.Contig2_All	971	0.33	3.39	3.36075	2.66202e-07	1.90012e-06	Up	NA	NA	NA	NA	NA	NA	NA
Unigene39028_All	472	0.69	7.08	3.35908	4.86826e-07	3.38126e-06	Up	NA	gi|345105466|gb|HQ225745.1|/3e-12/Argopecten irradians ferritin 3 (FTH3) gene, complete cds	NA	NA	NA	NA	NA
Unigene44916_All	777	1.07	10.97	3.35788	6.18144e-17	8.43226e-16	Up	NA	NA	NA	NA	NA	NA	NA
Unigene44346_All	498	0.65	6.66	3.35701	4.86826e-07	3.38282e-06	Up	NA	NA	NA	NA	NA	NA	NA
CL1151.Contig1_All	1642	0.29	2.97	3.35634	4.84536e-11	4.71161e-10	Up	gi|405969111|gb|EKC34117.1|/2.36509e-179/hypothetical protein CGI_10014955 [Crassostrea gigas]	NA	sp|Q9VYY9|EVI5_DROME/2e-90/Ecotropic viral integration site 5 ortholog OS=Drosophila melanogaster GN=Evi5 PE=1 SV=3	crg:105345167/2e-19/centromere protein F-like; K11499 centromere protein F	MK0690/6e-16/---	PTHR22957/1.2E-56/--	NA
Unigene6212_All	418	5.02	51.35	3.35461	4.40174e-38	1.26711e-36	Up	NA	NA	NA	NA	NA	NA	NA
CL525.Contig4_All	466	1.2	12.27	3.35403	2.46824e-11	2.45109e-10	Up	NA	NA	NA	NA	NA	NA	NA
Unigene39927_All	490	0.88	8.97	3.34953	6.23192e-09	5.17038e-08	Up	NA	NA	NA	NA	NA	NA	NA
CL1748.Contig3_All	1174	0.16	1.63	3.34873	2.3192e-05	0.000130545	Up	gi|405972579|gb|EKC37341.1|/5.74566e-06/Cell death protein 3 [Crassostrea gigas]	NA	NA	crg:105318727/4e-06/caspase-6-like; K02186 caspase 2 [EC:3.4.22.55]	NA	NA	NA
Unigene7376_All	1625	0.55	5.6	3.34792	1.55205e-18	2.29696e-17	Up	gi|405958856|gb|EKC24941.1|/2.22162e-113/Glycine receptor subunit alpha-2 [Crassostrea gigas]	NA	sp|Q7TNC8|GLRA2_MOUSE/2e-86/Glycine receptor subunit alpha-2 OS=Mus musculus GN=Glra2 PE=2 SV=1	crg:105334671/2e-96/glycine receptor subunit alpha-3-like; K05195 glycine receptor alpha-3	NA	PR00253/1.9E-39/Gamma-aminobutyric acid A (GABAA) receptor signature	biological_process:GO:0006810//transport;cellular_component:GO:0016020//membrane;
CL151.Contig2_All	704	0.4	4.07	3.34696	9.95604e-07	6.67069e-06	Up	gi|405957331|gb|EKC23550.1|/1.45329e-56/Interferon-induced protein 44-like protein [Crassostrea gigas]	NA	NA	NA	NA	PF07534/5.2E-17/TLD	NA
Unigene16245_All	1247	0.49	4.97	3.34239	6.0394e-13	6.61624e-12	Up	gi|405951570|gb|EKC19471.1|/1.0485e-77/15-hydroxyprostaglandin dehydrogenase [NAD+] [Crassostrea gigas]	NA	sp|Q8VCC1|PGDH_MOUSE/1e-48/15-hydroxyprostaglandin dehydrogenase [NAD(+)] OS=Mus musculus GN=Hpgd PE=2 SV=1	crg:105340704/2e-78/15-hydroxyprostaglandin dehydrogenase [NAD(+)]-like; K00069 15-hydroxyprostaglandin dehydrogenase (NAD) [EC:1.1.1.141]	CC0246/5e-26/---	PR00081/1.01E-26/Glucose/ribitol dehydrogenase family signature	NA
CL2912.Contig1_All	1544	0.59	5.98	3.34136	8.53866e-19	1.27652e-17	Up	gi|405963369|gb|EKC28948.1|/2.0266e-92/hypothetical protein CGI_10012792 [Crassostrea gigas]	NA	sp|Q6B9X6|VWKA_DICDI/4e-14/Alpha-protein kinase vwkA OS=Dictyostelium discoideum GN=vwkA PE=1 SV=1	NA	NA	PTHR14187/2.4E-67/--	NA
CL2438.Contig4_All	1648	0.16	1.62	3.33985	9.95604e-07	6.67217e-06	Up	gi|556104103|gb|ESO92755.1|/1.89715e-27/hypothetical protein LOTGIDRAFT_162235 [Lottia gigantea]	NA	sp|Q7T3S3|CHSTB_DANRE/1e-14/Carbohydrate sulfotransferase 11 OS=Danio rerio GN=chst11 PE=2 SV=1	crg:105324140/4e-51/uncharacterized LOC105324140; K01017 chondroitin 4-sulfotransferase 11 [EC:2.8.2.5]	NA	PTHR12137/1.5E-20/--	NA
CL3286.Contig4_All	1701	1.54	15.57	3.33777	1.62941e-51	6.42686e-50	Up	NA	gi|315076105|gb|HQ593149.1|/2e-07/Argopecten irradians clone AICL271 microsatellite sequence	NA	NA	NA	NA	NA
Unigene17301_All	1752	1.99	20.1	3.33636	7.7444e-68	4.0826e-66	Up	gi|313244217|emb|CBY15049.1|/2.35809e-31/unnamed protein product [Oikopleura dioica]	gi|632957157|ref|XM_007896130.1|/3e-06/PREDICTED: Callorhinchus milii Na(+)/H(+) exchange regulatory cofactor NHE-RF3-like (LOC103180336), transcript variant X6, mRNA	sp|P98088|MUC5A_HUMAN/5e-24/Mucin-5AC (Fragments) OS=Homo sapiens GN=MUC5AC PE=1 SV=3	cfr:102518704/2e-24/mucin-2-like; K10955 intestinal mucin-2	YGL028c/3e-09/---	NA	NA
CL3438.Contig1_All	4110	8.03	81.01	3.33463	0	0	Up	gi|405955326|gb|EKC22484.1|/5.16113e-73/von Willebrand factor D and EGF domain-containing protein [Crassostrea gigas]	NA	sp|Q6DFV8|VWDE_MOUSE/3e-27/von Willebrand factor D and EGF domain-containing protein OS=Mus musculus GN=Vwde PE=2 SV=2	crg:105322503/3e-41/uncharacterized LOC105322503; K12855 pre-mRNA-processing factor 6	NA	PS00022/-/EGF-like domain signature 1.	NA
CL3567.Contig3_All	2551	1.3	13.11	3.33408	1.89908e-65	9.63246e-64	Up	NA	NA	NA	NA	NA	NA	NA
Unigene33570_All	630	0.33	3.32	3.33065	7.30348e-05	0.00038023	Up	NA	NA	NA	NA	NA	NA	NA
Unigene41253_All	833	0.5	5.03	3.33056	6.23192e-09	5.16966e-08	Up	gi|405965881|gb|EKC31227.1|/4.66158e-69/hypothetical protein CGI_10007119 [Crassostrea gigas]	NA	NA	NA	NA	PTHR16897:SF2/1.4E-41/--	NA
Unigene39831_All	583	0.36	3.61	3.32593	7.30348e-05	0.000380197	Up	NA	NA	NA	NA	NA	NA	NA
CL1337.Contig1_All	2794	0.46	4.61	3.32506	5.91356e-26	1.18523e-24	Up	gi|89255269|dbj|BAE80716.1|/0/taurine transporter [Crassostrea gigas]	gi|589965044|ref|XM_006994997.1|/3e-10/PREDICTED: Peromyscus maniculatus bairdii solute carrier family 6 (neurotransmitter transporter), member 11 (Slc6a11), mRNA	sp|Q8VBW1|SC6A8_MOUSE/1e-144/Sodium- and chloride-dependent creatine transporter 1 OS=Mus musculus GN=Slc6a8 PE=2 SV=1	crg:105325240/0.0/taut; sodium- and chloride-dependent taurine transporter-like; K05039 solute carrier family 6 (neurotransmitter transporter, GABA) member 6/8/11/12/13	PM0380/3e-30/---	PTHR11616/6.5E-91/--	biological_process:GO:0055085//transmembrane transport;GO:0006836//neurotransmitter transport;cellular_component:GO:0016021//integral component of membrane;molecular_function:GO:0005328//neurotransmitter:sodium symporter activity;
Unigene23053_All	665	1.89	18.91	3.32269	7.63658e-24	1.4162e-22	Up	gi|556095887|gb|ESO84539.1|/7.90084e-06/hypothetical protein LOTGIDRAFT_236213 [Lottia gigantea]	NA	NA	NA	NA	NA	NA
Unigene46906_All	650	0.32	3.2	3.32193	7.30348e-05	0.000380131	Up	gi|405957303|gb|EKC23525.1|/4.70081e-101/Glutamine-dependent NAD(+) synthetase [Crassostrea gigas]	gi|110624135|dbj|AK225700.1|/1e-09/Homo sapiens mRNA for NAD synthetase 1 variant, clone: TMS00723	sp|Q3ZBF0|NADE_BOVIN/7e-93/Glutamine-dependent NAD(+) synthetase OS=Bos taurus GN=NADSYN1 PE=2 SV=1	crg:105330718/1e-101/glutamine-dependent NAD(+) synthetase-like; K01950 NAD+ synthase (glutamine-hydrolysing) [EC:6.3.5.1]	YHR074w_1/4e-77/---	PTHR23090:SF9/2.0E-146/--	NA
Unigene32066_All	818	0.25	2.5	3.32193	7.30348e-05	0.000379935	Up	gi|405962731|gb|EKC28380.1|/3.02372e-57/hypothetical protein CGI_10023765 [Crassostrea gigas]	NA	sp|Q8IZJ3|CPMD8_HUMAN/2e-32/C3 and PZP-like alpha-2-macroglobulin domain-containing protein 8 OS=Homo sapiens GN=CPAMD8 PE=1 SV=2	crg:105344266/6e-59/CD109 antigen-like; K06530 CD109 antigen	NA	PF07678/2.9E-20/A-macroglobulin complement component	NA
Unigene46307_All	738	0.28	2.79	3.31677	7.30348e-05	0.000380164	Up	NA	NA	NA	NA	NA	NA	NA
Unigene33011_All	596	0.53	5.28	3.31647	8.88138e-07	5.99595e-06	Up	NA	NA	NA	NA	NA	NA	NA
Unigene41224_All	430	1.02	10.15	3.31484	1.13469e-08	9.20633e-08	Up	gi|542260808|ref|XP_005465431.1|/1.06892e-11/PREDICTED: rhamnose-binding lectin-like, partial [Oreochromis niloticus]	NA	sp|B4LNA8|LPHN_DROVI/2e-11/Latrophilin Cirl OS=Drosophila virilis GN=Cirl PE=3 SV=1	spu:585549/1e-08/sushi, von Willebrand factor type A, EGF and pentraxin domain-containing protein 1-like; K17495 CUB and sushi domain-containing protein	NA	PF02140/1.5E-12/Galactose binding lectin domain	NA
Unigene12446_All	1227	1.73	17.19	3.31273	1.75494e-40	5.36426e-39	Up	NA	NA	NA	NA	NA	NA	NA
CL708.Contig6_All	809	0.61	6.06	3.31244	1.64732e-10	1.54217e-09	Up	NA	NA	NA	NA	NA	NA	NA
Unigene40536_All	1535	0.52	5.16	3.31079	3.70732e-16	4.89236e-15	Up	NA	NA	NA	NA	NA	NA	NA
CL4305.Contig2_All	1436	1.42	14.09	3.31071	3.74682e-39	1.10821e-37	Up	NA	NA	NA	NA	NA	PS50017/10.771/Death domain profile.	NA
CL1792.Contig1_All	684	1.85	18.35	3.31018	7.63658e-24	1.41576e-22	Up	NA	NA	NA	mde:101892107/5e-06/cytochrome c oxidase assembly factor 3, mitochondrial; K18175 cytochrome c oxidase assembly factor 3, animal type	NA	PF09813/1.1E-8/Coiled-coil domain-containing protein 56	NA
Unigene7090_All	2127	1.4	13.88	3.30951	4.44896e-57	1.95133e-55	Up	gi|405978335|gb|EKC42735.1|/3.2992e-46/LIM domain-containing protein D [Crassostrea gigas]	NA	sp|Q9BIW4|LIMD_DICDI/2e-11/LIM domain-containing protein D OS=Dictyostelium discoideum GN=limD PE=2 SV=1	cqu:CpipJ_CPIJ008699/9e-07/limd1; K16682 LIM domain-containing protein	NA	PF00412/1.5E-9/LIM domain	NA
Unigene15308_All	3888	1.03	10.2	3.30785	8.04902e-77	4.81568e-75	Up	gi|405966718|gb|EKC31961.1|/1.92858e-29/Poly [ADP-ribose] polymerase 12 [Crassostrea gigas]	gi|348020199|gb|JN703458.1|/3e-11/Chlamys farreri clone BAC Bam123C08, complete sequence	sp|Q8BZ20|PAR12_MOUSE/1e-18/Poly [ADP-ribose] polymerase 12 OS=Mus musculus GN=Parp12 PE=2 SV=3	crg:105348951/3e-24/poly [ADP-ribose] polymerase 12-like; K15259 poly [ADP-ribose] polymerase 7/11/12/13 [EC:2.4.2.30]	NA	PS50103/9.0/Zinc finger C3H1-type profile.	NA
Unigene43988_All	743	0.28	2.77	3.30639	7.30348e-05	0.000380033	Up	NA	NA	NA	NA	NA	NA	NA
Unigene43457_All	1098	0.37	3.66	3.30625	1.13469e-08	9.20757e-08	Up	gi|405967526|gb|EKC32675.1|/4.44879e-66/hypothetical protein CGI_10015728 [Crassostrea gigas]	NA	sp|Q8IYB3|SRRM1_HUMAN/2e-07/Serine/arginine repetitive matrix protein 1 OS=Homo sapiens GN=SRRM1 PE=1 SV=2	ssc:100519635/2e-07/HOXA4; homeobox A4; K09304 homeobox protein HoxA/B/C/D4	NA	NA	NA
CL1511.Contig2_All	608	0.54	5.34	3.30581	4.86826e-07	3.38243e-06	Up	NA	NA	NA	NA	NA	NA	NA
Unigene41485_All	483	0.45	4.45	3.30581	7.30348e-05	0.000380263	Up	gi|405976188|gb|EKC40704.1|/9.13707e-38/F-box only protein 10 [Crassostrea gigas]	NA	sp|Q9UK96|FBX10_HUMAN/2e-17/F-box only protein 10 OS=Homo sapiens GN=FBXO10 PE=1 SV=3	crg:105319267/2e-59/F-box only protein 10-like; K10296 F-box protein 10	NA	SM00710/340.0/Parallel beta-helix repeats	NA
Unigene43289_All	1763	0.34	3.36	3.30485	1.99653e-12	2.12096e-11	Up	gi|405963611|gb|EKC29173.1|/2.74655e-104/Heat shock 70 kDa protein 12B [Crassostrea gigas]	NA	sp|Q8K0U4|HS12A_MOUSE/2e-70/Heat shock 70 kDa protein 12A OS=Mus musculus GN=Hspa12a PE=1 SV=1	aqu:100633272/2e-32/uncharacterized LOC100633272; K10380 ankyrin	CAC1282/6e-10/---	PF00012/2.5E-9/Hsp70 protein	NA
CL437.Contig1_All	1550	2.06	20.33	3.30289	9.9522e-61	4.66716e-59	Up	gi|405963089|gb|EKC28693.1|/3.47081e-44/E3 ubiquitin-protein ligase MIB2 [Crassostrea gigas]	NA	sp|Q80SY4|MIB1_MOUSE/1e-40/E3 ubiquitin-protein ligase MIB1 OS=Mus musculus GN=Mib1 PE=1 SV=1	crg:105329662/7e-45/E3 ubiquitin-protein ligase MIB1-like; K10645 E3 ubiquitin-protein ligase mind-bomb [EC:2.3.2.27]	RSc1788/3e-12/---	PS50088/9.912/Ankyrin repeat profile.	NA
Unigene32714_All	1288	0.55	5.42	3.30079	2.70762e-14	3.20934e-13	Up	NA	NA	NA	NA	NA	NA	NA
CL1292.Contig1_All	592	0.54	5.32	3.30039	8.88138e-07	5.99662e-06	Up	NA	NA	NA	NA	NA	NA	NA
Unigene36824_All	1524	0.39	3.84	3.29956	3.6226e-12	3.77979e-11	Up	gi|405951457|gb|EKC19368.1|/4.26089e-111/Sine oculis-binding-like protein [Crassostrea gigas]	gi|242009684|ref|XM_002425568.1|/7e-13/Pediculus humanus corporis conserved hypothetical protein, mRNA	sp|A5X7A0|SOBPA_DANRE/2e-34/Sine oculis-binding protein homolog OS=Danio rerio GN=sobpa PE=2 SV=1	pxy:105394758/2e-17/uncharacterized LOC105394758; K02367 glucuronyl/N-acetylglucosaminyl transferase EXT2 [EC:2.4.1.224 2.4.1.225]	NA	PF15279/6.5E-46/Sine oculis-binding protein	NA
Unigene12032_All	394	0.57	5.61	3.29897	7.30348e-05	0.000380099	Up	gi|405966076|gb|EKC31398.1|/6.45672e-25/GTP-binding protein RAD [Crassostrea gigas]	NA	sp|P55043|RAD_RAT/2e-19/GTP-binding protein RAD OS=Rattus norvegicus GN=Rrad PE=2 SV=2	crg:105348179/1e-25/GTP-binding protein REM 1-like; K07847 Rad and Gem related GTP binding protein 1	SPAC18G6.03/2e-08/---	PTHR24070/2.1E-31/--	NA
Unigene19577_All	1807	1.43	14.07	3.29854	6.224e-49	2.31988e-47	Up	gi|340713307|ref|XP_003395186.1|/2.12944e-35/PREDICTED: LOW QUALITY PROTEIN: caspase-1-like [Bombus terrestris]	NA	sp|P55866|CASP3_XENLA/1e-35/Caspase-3 OS=Xenopus laevis GN=casp3 PE=2 SV=1	cfo:105250225/3e-35/Caspase-1; caspase-1-like; K04489 caspase invertebrate, apoptosis-related cysteine protease [EC:3.4.22.-]	NA	SM00115/7.1E-59/Caspase, interleukin-1 beta converting enzyme (ICE) homologues	NA
Unigene40256_All	979	0.42	4.13	3.29768	1.13469e-08	9.21129e-08	Up	NA	NA	NA	NA	NA	NA	NA
Unigene20617_All	566	0.38	3.73	3.2951	7.30348e-05	0.000380066	Up	NA	NA	NA	NA	NA	NA	NA
Unigene40183_All	611	0.35	3.43	3.29278	7.30348e-05	0.000379967	Up	NA	NA	NA	NA	NA	NA	NA
CL1941.Contig3_All	760	0.54	5.29	3.29224	3.67168e-09	3.10433e-08	Up	gi|405969641|gb|EKC34599.1|/1.22744e-14/hypothetical protein CGI_10012950 [Crassostrea gigas]	NA	NA	NA	NA	NA	NA
Unigene41380_All	971	0.32	3.13	3.29002	8.88138e-07	5.99729e-06	Up	NA	NA	NA	NA	NA	NA	NA
CL185.Contig2_All	490	1.15	11.24	3.28894	8.2009e-11	7.84798e-10	Up	NA	gi|222355231|gb|FJ014707.1|/2e-22/Argopecten irradians cytoplasmic copper/zinc superoxide dismutase gene, complete cds	NA	NA	NA	NA	NA
CL4788.Contig1_All	2160	0.69	6.74	3.28808	2.31318e-29	5.20729e-28	Up	gi|405961952|gb|EKC27679.1|/6.56459e-151/Importin subunit alpha-2 [Crassostrea gigas]	NA	sp|A9QM74|IMA8_HUMAN/2e-42/Importin subunit alpha-8 OS=Homo sapiens GN=KPNA7 PE=1 SV=1	spu:583874/9e-44/importin subunit alpha-1; K15043 importin subunit alpha-2	YNL189w/2e-40/---	PF01749/2.4E-5/Importin beta binding domain	NA
Unigene36575_All	705	0.3	2.93	3.28787	7.30348e-05	0.000380296	Up	gi|390342237|ref|XP_782654.3|/7.51597e-29/PREDICTED: uncharacterized protein LOC577326 [Strongylocentrotus purpuratus]	NA	sp|P05143|PRP2_MOUSE/6e-24/Proline-rich protein 2 OS=Mus musculus GN=Prp2 PE=2 SV=2	spu:577326/2e-29/cleavage and polyadenylation specificity factor subunit 6; K13911 basic salivary proline-rich protein 1/2	Rv3876/3e-11/---	NA	NA
Unigene17894_All	1035	1.57	15.29	3.28375	3.24278e-30	7.46433e-29	Up	NA	NA	NA	NA	NA	NA	NA
CL231.Contig1_All	3056	0.82	7.98	3.28269	1.32669e-47	4.77101e-46	Up	gi|405977608|gb|EKC42050.1|/2.41323e-56/Lymphocyte cytosolic protein 2 [Crassostrea gigas]	NA	sp|Q95JC9|PRP_PIG/6e-25/Basic proline-rich protein OS=Sus scrofa PE=1 SV=2	spu:575645/4e-27/B-cell linker protein; K07371 B-cell linker protein	Rv3876/3e-12/---	SM00454/1.7E-5/Sterile alpha motif.	NA
CL1671.Contig1_All	1091	0.47	4.57	3.28146	2.7076e-10	2.48804e-09	Up	gi|405969584|gb|EKC34546.1|/9.30145e-24/Sodium/hydrogen exchanger 9 [Crassostrea gigas]	NA	sp|P32297|ACHA3_HUMAN/1e-23/Neuronal acetylcholine receptor subunit alpha-3 OS=Homo sapiens GN=CHRNA3 PE=1 SV=4	phd:102344415/4e-23/CHRNG; cholinergic receptor, nicotinic, gamma (muscle); K04818 nicotinic acetylcholine receptor gamma	NA	PF02931/2.2E-40/Neurotransmitter-gated ion-channel ligand binding domain	NA
Unigene6554_All	2719	0.54	5.24	3.27854	4.14394e-28	8.9832e-27	Up	gi|405950265|gb|EKC18263.1|/0/Thrombospondin-4 [Crassostrea gigas]	NA	sp|Q8TF66|LRC15_HUMAN/5e-33/Leucine-rich repeat-containing protein 15 OS=Homo sapiens GN=LRRC15 PE=1 SV=2	crg:105319080/0.0/uncharacterized LOC105319080; K04659 thrombospondin 2/3/4/5; K05719 integrin beta 1; K06493 integrin beta 3; K16338 syndecan 4	alr0124_1/2e-22/---	PS51450/5.132/Leucine-rich repeat profile.	NA
Unigene38380_All	1062	0.96	9.29	3.27457	2.3281e-19	3.58445e-18	Up	NA	NA	NA	NA	NA	PS50158/9.504/Zinc finger CCHC-type profile.	NA
Unigene35404_All	1521	0.33	3.19	3.27302	2.7076e-10	2.48766e-09	Up	gi|156352954|ref|XP_001622846.1|/3.43933e-44/hypothetical protein NEMVEDRAFT_v1g220148 [Nematostella vectensis] &gt;gi|156209470|gb|EDO30746.1| predicted protein [Nematostella vectensis]	NA	NA	NA	NA	PTHR13627/3.4E-51/--	NA
Unigene43564_All	2483	0.64	6.18	3.27146	3.24278e-30	7.46719e-29	Up	gi|524865547|ref|XP_005089602.1|/0/PREDICTED: wolframin-like [Aplysia californica]	NA	sp|P56695|WFS1_MOUSE/4e-89/Wolframin OS=Mus musculus GN=Wfs1 PE=1 SV=1	crg:105344157/0.0/wolframin-like; K14020 wolfamin	NA	PTHR13098/4.3E-132/--	NA
CL62.Contig1_All	617	0.51	4.92	3.27009	1.61611e-06	1.06147e-05	Up	NA	NA	NA	NA	NA	NA	NA
CL26.Contig2_All	600	1.15	11.07	3.26695	3.31506e-13	3.68933e-12	Up	NA	NA	NA	NA	NA	NA	NA
CL737.Contig3_All	1022	0.4	3.84	3.26303	3.7388e-08	2.89596e-07	Up	gi|405951382|gb|EKC19299.1|/6.45621e-16/hypothetical protein CGI_10008959 [Crassostrea gigas]	NA	sp|Q9D2L9|F111A_MOUSE/3e-08/Protein FAM111A OS=Mus musculus GN=Fam111a PE=2 SV=1	NA	NA	PF13365/7.5E-11/Trypsin-like peptidase domain	NA
Unigene33189_All	485	0.67	6.42	3.26034	1.61611e-06	1.06124e-05	Up	NA	NA	NA	NA	NA	NA	NA
Unigene37867_All	712	0.44	4.21	3.25824	1.61611e-06	1.06159e-05	Up	gi|390342515|ref|XP_001177165.2|/4.36244e-16/PREDICTED: uncharacterized protein LOC752194 [Strongylocentrotus purpuratus]	NA	sp|P21329|RTJK_DROFU/1e-07/RNA-directed DNA polymerase from mobile element jockey OS=Drosophila funebris GN=jockey\pol PE=1 SV=1	pxy:105395227/3e-06/116 kDa U5 small nuclear ribonucleoprotein component-like; K12852 116 kDa U5 small nuclear ribonucleoprotein component	NA	NA	NA
Unigene44416_All	686	0.3	2.87	3.25802	0.000133246	0.000664224	Up	gi|405965013|gb|EKC30444.1|/4.86183e-54/Putative pre-mRNA-splicing factor ATP-dependent RNA helicase mog-5 [Crassostrea gigas]	NA	sp|Q54F05|DHX8_DICDI/8e-10/ATP-dependent RNA helicase dhx8 OS=Dictyostelium discoideum GN=dhx8 PE=3 SV=1	tru:101071413/8e-10/dhx8; DEAH (Asp-Glu-Ala-His) box polypeptide 8; K12818 ATP-dependent RNA helicase DHX8/PRP22 [EC:3.6.4.13]	SPBC16H5.10c/2e-09/---	PTHR18934:SF81/4.2E-22/--	NA
Unigene32876_All	1316	0.23	2.2	3.2578	1.61611e-06	1.06182e-05	Up	gi|556097504|gb|ESO86156.1|/4.56268e-95/hypothetical protein LOTGIDRAFT_167389 [Lottia gigantea]	gi|390351687|ref|XM_003727659.1|/6e-07/PREDICTED: Strongylocentrotus purpuratus uncharacterized LOC100893802 (LOC100893802), mRNA	sp|Q8NF91|SYNE1_HUMAN/2e-08/Nesprin-1 OS=Homo sapiens GN=SYNE1 PE=1 SV=4	crg:105329309/1e-75/nesprin-1-like; K19326 nesprin-1	AF1032/4e-07/---	NA	NA
CL130.Contig7_All	1067	0.62	5.93	3.25769	6.0394e-13	6.61504e-12	Up	NA	NA	NA	NA	NA	NA	NA
Unigene11246_All	633	0.5	4.78	3.25701	1.61611e-06	1.06193e-05	Up	NA	gi|193734819|gb|EU623900.1|/7e-11/Argopecten irradians clone HWAD178 microsatellite sequence	NA	NA	NA	NA	NA
Unigene47036_All	667	0.31	2.96	3.25526	0.000133246	0.000663566	Up	gi|556760343|ref|XP_005975491.1|/2.00833e-49/PREDICTED: aspartate beta-hydroxylase domain-containing protein 2 [Pantholops hodgsonii]	NA	sp|Q6ICH7|ASPH2_HUMAN/8e-50/Aspartate beta-hydroxylase domain-containing protein 2 OS=Homo sapiens GN=ASPHD2 PE=2 SV=1	cmk:103180766/6e-25/asph; aspartate beta-hydroxylase; K00476 aspartate beta-hydroxylase [EC:1.14.11.16]	PA0936/1e-12/---	PF05118/1.7E-33/Aspartyl/Asparaginyl beta-hydroxylase	NA
CL1354.Contig1_All	1092	1.51	14.39	3.25245	5.86248e-30	1.34024e-28	Up	gi|556095887|gb|ESO84539.1|/4.05343e-11/hypothetical protein LOTGIDRAFT_236213 [Lottia gigantea]	NA	NA	NA	NA	NA	NA
CL4205.Contig2_All	1673	6.59	62.8	3.25241	1.93149e-194	3.27203e-192	Up	gi|405950626|gb|EKC18601.1|/1.78177e-89/Angiogenic factor with G patch and FHA domains 1 [Crassostrea gigas]	gi|524903931|ref|XM_005108100.1|/9e-22/PREDICTED: Aplysia californica max-like protein X-like (LOC101858968), mRNA	sp|Q9UH92|MLX_HUMAN/6e-73/Max-like protein X OS=Homo sapiens GN=MLX PE=1 SV=2	crg:105344411/1e-94/max-like protein X; K09113 MAX-like protein X	NA	PTHR15741:SF25/7.0E-105/--	NA
CL4924.Contig2_All	1438	0.7	6.67	3.25226	7.61174e-19	1.13993e-17	Up	NA	NA	NA	NA	NA	NA	NA
Unigene39676_All	435	0.5	4.76	3.25096	0.000133246	0.000663019	Up	NA	NA	NA	NA	NA	NA	NA
Unigene43641_All	712	0.29	2.76	3.25054	0.000133246	0.000663621	Up	NA	NA	NA	NA	NA	NA	NA
Unigene44425_All	598	0.35	3.33	3.2501	0.000133246	0.000662855	Up	gi|123484027|ref|XP_001324167.1|/6.07133e-06/hypothetical protein [Trichomonas vaginalis G3] &gt;gi|121907045|gb|EAY11944.1| hypothetical protein TVAG_399490 [Trichomonas vaginalis G3]	NA	NA	NA	NA	NA	NA
CL1059.Contig1_All	2327	0.48	4.56	3.24793	3.24478e-21	5.40868e-20	Up	gi|556096631|gb|ESO85283.1|/7.82436e-81/hypothetical protein LOTGIDRAFT_235794 [Lottia gigantea]	NA	sp|Q49A92|CH034_HUMAN/2e-21/Uncharacterized protein C8orf34 OS=Homo sapiens GN=C8orf34 PE=2 SV=2	crg:105339136/5e-08/transcriptional regulator ATRX-like; K10779 transcriptional regulator ATRX [EC:3.6.4.12]	NA	PTHR32000:SF2/1.4E-23/--	NA
Unigene769_All	1241	1.22	11.59	3.24793	1.35179e-27	2.88988e-26	Up	gi|405970232|gb|EKC35160.1|/7.52897e-44/Tumor necrosis factor ligand superfamily member 10 [Crassostrea gigas]	NA	sp|P41047|TNFL6_MOUSE/7e-13/Tumor necrosis factor ligand superfamily member 6 OS=Mus musculus GN=Faslg PE=1 SV=1	crg:105344743/3e-47/CD40 ligand-like; K04721 tumor necrosis factor ligand superfamily member 10	NA	PF00229/2.3E-23/TNF(Tumour Necrosis Factor) family	NA
Unigene41258_All	1299	0.54	5.13	3.24793	5.44164e-14	6.34644e-13	Up	gi|295293387|gb|ADF87943.1|/7.66638e-16/C-type lectin 5 [Azumapecten farreri]	NA	sp|P55067|NCAN_RAT/2e-11/Neurocan core protein OS=Rattus norvegicus GN=Ncan PE=1 SV=1	tru:101063313/7e-12/neurocan core protein-like; K05695 receptor-type tyrosine-protein phosphatase F [EC:3.1.3.48]; K06491 neural cell adhesion molecule; K06550 L1 cell adhesion molecule; K06756 neuronal cell adhesion molecule; K06778 receptor-type tyrosine-protein phosphatase S [EC:3.1.3.48]; K06794 neurocan core protein	NA	NA	NA
Unigene35231_All	767	0.41	3.89	3.24607	1.61611e-06	1.0617e-05	Up	gi|405950596|gb|EKC18574.1|/1.13313e-31/LYR motif-containing protein 1 [Crassostrea gigas]	NA	sp|B5FYC7|LYRM1_TAEGU/5e-25/LYR motif-containing protein 1 OS=Taeniopygia guttata GN=LYRM1 PE=2 SV=1	smm:Smp_143390/3e-18/guanyl-nucleotide exchange factor; K18441 cytohesin	NA	PTHR14273:SF0/9.3E-41/--	NA
Unigene41464_All	383	0.58	5.5	3.24531	0.000133246	0.000664115	Up	NA	NA	NA	NA	NA	NA	NA
Unigene36282_All	1250	0.48	4.55	3.24476	1.18748e-11	1.2032e-10	Up	gi|405977383|gb|EKC41840.1|/2.81459e-22/Carbohydrate sulfotransferase 11 [Crassostrea gigas]	NA	sp|Q6AXM1|CHSTA_DANRE/5e-09/Carbohydrate sulfotransferase 10 OS=Danio rerio GN=chst10 PE=2 SV=1	crg:105324140/4e-45/uncharacterized LOC105324140; K01017 chondroitin 4-sulfotransferase 11 [EC:2.8.2.5]	NA	PF03567/3.8E-17/Sulfotransferase family	NA
CL570.Contig1_All	1708	0.58	5.49	3.24268	1.37443e-18	2.03859e-17	Up	NA	NA	NA	NA	NA	NA	NA
CL1496.Contig1_All	5903	2.53	23.94	3.24221	5.24266e-266	1.34542e-263	Up	gi|405960351|gb|EKC26281.1|/4.85348e-128/Low-density lipoprotein receptor-related protein 1B [Crassostrea gigas]	NA	sp|Q9QYP1|LRP4_RAT/3e-51/Low-density lipoprotein receptor-related protein 4 OS=Rattus norvegicus GN=Lrp4 PE=1 SV=2	crg:105330127/1e-118/low-density lipoprotein receptor-related protein 4-like; K03068 low density lipoprotein receptor-related protein 5/6	NA	SM00181/26.0/Epidermal growth factor-like domain.	NA
Unigene47534_All	573	0.37	3.5	3.24176	0.000133246	0.000663238	Up	NA	NA	sp|B1MTK1|THOC2_CALMO/5e-07/THO complex subunit 2 OS=Callicebus moloch GN=THOC2 PE=3 SV=1	cjc:100399788/5e-06/THOC2; THO complex 2; K12879 THO complex subunit 2	NA	NA	NA
CL3402.Contig2_All	5245	0.82	7.74	3.23864	1.82048e-77	1.10341e-75	Up	gi|524914058|ref|XP_005111849.1|/6.40052e-124/PREDICTED: serine/arginine repetitive matrix protein 2-like isoform X2 [Aplysia californica]	NA	sp|A2AR02|PPIG_MOUSE/6e-36/Peptidyl-prolyl cis-trans isomerase G OS=Mus musculus GN=Ppig PE=2 SV=1	fch:102051324/1e-39/NKTR; natural killer-tumor recognition sequence; K12740 NK-tumor recognition protein	SPAC140.02/1e-14/---	NA	NA
CL1842.Contig2_All	1175	1.3	12.27	3.23855	2.4392e-27	5.17241e-26	Up	gi|524908956|ref|XP_005109567.1|/1.23323e-32/PREDICTED: ubiquinol-cytochrome c reductase complex chaperone CBP3 homolog [Aplysia californica]	NA	sp|Q9CWU6|UQCC1_MOUSE/7e-28/Ubiquinol-cytochrome-c reductase complex assembly factor 1 OS=Mus musculus GN=Uqcc1 PE=2 SV=1	ola:101162280/2e-29/ubiquinol-cytochrome-c reductase complex assembly factor 1; K17662 cytochrome b pre-mRNA-processing protein 3	NA	PF03981/2.4E-29/Ubiquinol-cytochrome C chaperone	NA
Unigene32918_All	454	0.48	4.53	3.2384	0.000133246	0.00066406	Up	NA	NA	NA	NA	NA	NA	NA
Unigene34393_All	547	0.39	3.68	3.23816	0.000133246	0.000663731	Up	NA	NA	NA	NA	NA	NA	NA
Unigene42655_All	385	0.58	5.47	3.23742	0.000133246	0.000663895	Up	NA	NA	NA	NA	NA	NA	NA
CL100.Contig1_All	2838	5.5	51.86	3.23712	3.62598e-274	9.50763e-272	Up	gi|315570412|gb|ADU33211.1|/3.919e-53/microsomal glutathione S-transferase 3 [Pinctada martensi]	gi|255098792|gb|FJ590509.1|/1e-15/Argopecten irradians manganese superoxide dismutase (MnSOD) gene, complete cds	sp|Q3T100|MGST3_BOVIN/1e-28/Microsomal glutathione S-transferase 3 OS=Bos taurus GN=MGST3 PE=2 SV=1	crg:105321515/2e-60/microsomal glutathione S-transferase 3-like; K00799 glutathione S-transferase [EC:2.5.1.18]	NA	PF01124/1.3E-20/MAPEG family	cellular_component:GO:0016020//membrane;GO:0005783//endoplasmic reticulum;GO:0005635//nuclear envelope;molecular_function:GO:0004364//glutathione transferase activity;GO:0004602//glutathione peroxidase activity;
Unigene42685_All	742	0.28	2.64	3.23704	0.000133246	0.000663183	Up	gi|405953136|gb|EKC20853.1|/1.50344e-86/Transformation/transcription domain-associated protein [Crassostrea gigas]	gi|532110148|ref|XM_005339729.1|/6e-18/PREDICTED: Spermophilus tridecemlineatus transformation/transcription domain-associated protein (Trrap), mRNA	sp|Q80YV3|TRRAP_MOUSE/7e-72/Transformation/transcription domain-associated protein OS=Mus musculus GN=Trrap PE=1 SV=2	crg:105345162/3e-87/transformation/transcription domain-associated protein-like; K08874 transformation/transcription domain-associated protein	NA	PTHR11139:SF1/4.4E-62/--	biological_process:GO:0016310//phosphorylation;GO:0006281//DNA repair;GO:0016573//histone acetylation;cellular_component:GO:0000123//histone acetyltransferase complex;molecular_function:GO:0016301//kinase activity;
Unigene35086_All	741	0.28	2.64	3.23704	0.000133246	0.0006628	Up	gi|556098932|gb|ESO87584.1|/1.67451e-29/hypothetical protein LOTGIDRAFT_166465 [Lottia gigantea]	NA	sp|Q9XWD6|CED1_CAEEL/7e-18/Cell death abnormality protein 1 OS=Caenorhabditis elegans GN=ced-1 PE=1 SV=1	crg:105333895/9e-29/uncharacterized LOC105333895; K18032 receptor-type tyrosine-protein phosphatase A [EC:3.1.3.48]	NA	NA	NA
Unigene43989_All	796	0.26	2.45	3.2362	0.000133246	0.000663292	Up	gi|556107103|gb|ESO95755.1|/9.04422e-11/hypothetical protein LOTGIDRAFT_116422 [Lottia gigantea]	NA	NA	NA	NA	PTHR31389:SF4/1.2E-16/--	NA
Unigene32339_All	675	0.31	2.92	3.23563	0.000133246	0.00066417	Up	NA	NA	NA	NA	NA	NA	NA
CL3798.Contig1_All	675	0.31	2.92	3.23563	0.000133246	0.000662745	Up	gi|625258783|ref|XP_007620788.1|/6.65024e-24/PREDICTED: mucin-17-like [Cricetulus griseus]	NA	sp|O46598|HAVR1_CHLAE/1e-11/Hepatitis A virus cellular receptor 1 OS=Chlorocebus aethiops GN=HAVCR1 PE=1 SV=2	cmk:103182084/4e-13/flocculation protein FLO11-like; K16145	CC1007/9e-09/---	NA	NA
CL5247.Contig1_All	1279	0.24	2.26	3.23522	1.61611e-06	1.06136e-05	Up	gi|405961704|gb|EKC27465.1|/4.38108e-103/hypothetical protein CGI_10005452 [Crassostrea gigas]	NA	sp|Q63HN8|RN213_HUMAN/8e-43/E3 ubiquitin-protein ligase RNF213 OS=Homo sapiens GN=RNF213 PE=1 SV=3	NA	NA	PTHR22605:SF5/6.3E-61/--	NA
CL2239.Contig1_All	1286	0.29	2.73	3.23478	4.29492e-08	3.30929e-07	Up	gi|405962880|gb|EKC28515.1|/4.36839e-34/Inositol hexakisphosphate and diphosphoinositol-pentakisphosphate kinase [Crassostrea gigas]	NA	sp|A7Z050|VIP1_BOVIN/8e-07/Inositol hexakisphosphate and diphosphoinositol-pentakisphosphate kinase 1 OS=Bos taurus GN=PPIP5K1 PE=2 SV=1	crg:105332818/2e-33/inositol hexakisphosphate and diphosphoinositol-pentakisphosphate kinase 2-like; K13024 inositol-hexakisphosphate/diphosphoinositol-pentakisphosphate 1-kinase [EC:2.7.4.24]	NA	NA	NA
Unigene42690_All	548	0.39	3.67	3.23423	0.000133246	0.000663128	Up	NA	NA	NA	NA	NA	NA	NA
Unigene40382_All	1340	0.3	2.82	3.23266	3.7388e-08	2.89633e-07	Up	gi|556105139|gb|ESO93791.1|/0/hypothetical protein LOTGIDRAFT_205644 [Lottia gigantea]	gi|634850004|ref|XM_007941508.1|/5e-32/PREDICTED: Orycteropus afer afer MYC binding protein 2, E3 ubiquitin protein ligase (MYCBP2), mRNA	sp|O75592|MYCB2_HUMAN/0.0/E3 ubiquitin-protein ligase MYCBP2 OS=Homo sapiens GN=MYCBP2 PE=1 SV=3	crg:105342162/0.0/E3 ubiquitin-protein ligase MYCBP2-like; K10693 E3 ubiquitin-protein ligase MYCBP2 [EC:2.3.2.27]	NA	PTHR12846/0.0/--	NA
Unigene39585_All	318	0.73	6.85	3.23014	0.000133246	0.000664005	Up	NA	NA	NA	NA	NA	NA	NA
Unigene37293_All	531	0.81	7.6	3.23001	3.7388e-08	2.89559e-07	Up	NA	gi|159134833|gb|AC201860.3|/4e-09/Gallus gallus BAC clone TAM32-10H12 from chromosome z, complete sequence	NA	NA	NA	NA	NA
Unigene32095_All	514	0.42	3.94	3.22973	0.000133246	0.00066395	Up	NA	NA	NA	NA	NA	NA	NA
Unigene32956_All	975	0.21	1.97	3.22973	0.000133246	0.000663402	Up	NA	NA	NA	NA	NA	NA	NA
Unigene14421_All	1104	11.94	111.94	3.22885	9.61308e-223	1.91335e-220	Up	gi|556104104|gb|ESO92756.1|/1.57104e-18/hypothetical protein LOTGIDRAFT_232897 [Lottia gigantea]	NA	NA	NA	NA	NA	NA
Unigene32745_All	538	0.4	3.75	3.22882	0.000133246	0.000663511	Up	NA	NA	NA	NA	NA	NA	NA
Unigene31688_All	659	0.32	3	3.22882	0.000133246	0.000663457	Up	NA	NA	NA	NA	NA	NA	NA
CL2427.Contig3_All	2257	0.83	7.77	3.22673	1.04485e-33	2.66664e-32	Up	gi|405962584|gb|EKC28247.1|/3.26986e-84/Tenascin-X [Crassostrea gigas]	NA	sp|Q9XWD6|CED1_CAEEL/2e-43/Cell death abnormality protein 1 OS=Caenorhabditis elegans GN=ced-1 PE=1 SV=1	crg:105333895/9e-63/uncharacterized LOC105333895; K18032 receptor-type tyrosine-protein phosphatase A [EC:3.1.3.48]	NA	SM00181/62.0/Epidermal growth factor-like domain.	NA
Unigene44362_All	579	0.37	3.46	3.22517	0.000133246	0.000663676	Up	gi|558151603|ref|XP_006120812.1|/4.52843e-08/PREDICTED: uncharacterized protein LOC102456870 [Pelodiscus sinensis]	NA	NA	NA	NA	NA	NA
CL524.Contig5_All	912	0.49	4.58	3.22449	6.23192e-09	5.16895e-08	Up	NA	NA	NA	NA	NA	NA	NA
Unigene18343_All	1502	0.53	4.95	3.22336	7.18258e-15	8.84375e-14	Up	gi|556108796|gb|ESO97448.1|/2.31994e-69/hypothetical protein LOTGIDRAFT_115026 [Lottia gigantea]	NA	sp|Q4V7W8|MET20_XENLA/6e-56/Methyltransferase-like protein 20 OS=Xenopus laevis GN=mettl20 PE=2 SV=1	NA	mlr4229/3e-32/---	PTHR18895:SF3/5.6E-36/--	NA
Unigene45539_All	702	0.3	2.8	3.22239	0.000133246	0.000663347	Up	gi|556102977|gb|ESO91629.1|/3.60854e-108/hypothetical protein LOTGIDRAFT_122204, partial [Lottia gigantea]	gi|524869518|ref|XM_005091495.1|/9e-60/PREDICTED: Aplysia californica dynein heavy chain 10, axonemal-like (LOC101850776), mRNA	sp|Q8IVF4|DYH10_HUMAN/6e-99/Dynein heavy chain 10, axonemal OS=Homo sapiens GN=DNAH10 PE=1 SV=4	crg:105343293/7e-108/dynein heavy chain 10, axonemal-like; K10408 dynein heavy chain, axonemal	YKR054c/2e-14/---	PTHR10676:SF135/1.5E-151/--	biological_process:GO:0007018//microtubule-based movement;cellular_component:GO:0030286//dynein complex;molecular_function:GO:0005524//ATP binding;GO:0003777//microtubule motor activity;GO:0016887//ATPase activity;
Unigene39755_All	540	0.4	3.73	3.2211	0.000133246	0.000663786	Up	NA	NA	NA	NA	NA	NA	NA
CL415.Contig2_All	4677	3.28	30.58	3.22082	1.02876e-266	2.65139e-264	Up	gi|405966631|gb|EKC31891.1|/6.30132e-99/Deleted in malignant brain tumors 1 protein [Crassostrea gigas]	gi|309256118|gb|HQ197426.1|/2e-09/Argopecten purpuratus clone B123 microsatellite sequence	sp|Q8CIZ5|DMBT1_RAT/5e-41/Deleted in malignant brain tumors 1 protein OS=Rattus norvegicus GN=Dmbt1 PE=1 SV=1	crg:105335707/6e-94/deleted in malignant brain tumors 1 protein-like; K13912 deleted in malignant brain tumors 1 protein	NA	PR00258/1.53E-19/Speract receptor signature	NA
Unigene32520_All	682	0.31	2.89	3.22073	0.000133246	0.000663073	Up	gi|405957826|gb|EKC24006.1|/1.56558e-12/hypothetical protein CGI_10014249 [Crassostrea gigas]	NA	NA	NA	NA	NA	NA
Unigene32915_All	2251	0.57	5.31	3.21968	2.20988e-23	4.01789e-22	Up	gi|405954465|gb|EKC21898.1|/6.2906e-19/Tripartite motif-containing protein 2 [Crassostrea gigas]	NA	sp|Q9H8W5|TRI45_HUMAN/4e-06/Tripartite motif-containing protein 45 OS=Homo sapiens GN=TRIM45 PE=1 SV=2	crg:105330300/1e-19/protein PML-like; K11997 tripartite motif-containing protein 2/3	NA	PS51125/6.065/NHL repeat profile.	NA
CL5013.Contig3_All	3379	0.38	3.54	3.21968	1.22607e-23	2.25432e-22	Up	gi|405975490|gb|EKC40051.1|/4.04262e-44/von Willebrand factor D and EGF domain-containing protein [Crassostrea gigas]	gi|193809560|emb|AM910992.1|/1e-06/Plasmodium knowlesi strain H chromosome 10, complete genome	sp|Q8N2E2|VWDE_HUMAN/4e-22/von Willebrand factor D and EGF domain-containing protein OS=Homo sapiens GN=VWDE PE=2 SV=4	crg:105322503/7e-25/uncharacterized LOC105322503; K12855 pre-mRNA-processing factor 6	SPAC56F8.03/9e-06/---	PS51233/10.316/VWFD domain profile.	NA
Unigene42190_All	1959	0.35	3.26	3.21945	5.24622e-13	5.77352e-12	Up	gi|585693452|ref|XP_006821635.1|/3.87464e-62/PREDICTED: sushi, von Willebrand factor type A, EGF and pentraxin domain-containing protein 1-like [Saccoglossus kowalevskii]	NA	sp|Q4LDE5|SVEP1_HUMAN/1e-35/Sushi, von Willebrand factor type A, EGF and pentraxin domain-containing protein 1 OS=Homo sapiens GN=SVEP1 PE=1 SV=3	crg:105335345/8e-79/sushi, von Willebrand factor type A, EGF and pentraxin domain-containing protein 1-like; K17495 CUB and sushi domain-containing protein	NA	SM00179/6.5E-5/Calcium-binding EGF-like domain	NA
Unigene5670_All	693	0.45	4.19	3.21895	2.93276e-06	1.86531e-05	Up	NA	gi|323510943|gb|HQ225752.1|/2e-14/Argopecten irradians clone AiDD105 microsatellite sequence	NA	NA	NA	NA	NA
Unigene45440_All	628	0.34	3.16	3.21632	0.000133246	0.000662964	Up	NA	NA	NA	NA	NA	NA	NA
Unigene19386_All	2508	3.54	32.84	3.21363	1.3833e-152	1.73439e-150	Up	gi|405951265|gb|EKC19192.1|/1.8666e-43/hypothetical protein CGI_10009262 [Crassostrea gigas]	NA	NA	NA	NA	NA	NA
CL4302.Contig2_All	1496	0.4	3.71	3.21335	2.14508e-11	2.14181e-10	Up	NA	NA	NA	NA	NA	NA	NA
Unigene45863_All	598	0.53	4.91	3.21166	2.93276e-06	1.86394e-05	Up	NA	NA	NA	NA	NA	NA	NA
Unigene40682_All	282	1.26	11.67	3.21131	2.93276e-06	1.86512e-05	Up	gi|156395736|ref|XP_001637266.1|/6.82532e-22/predicted protein [Nematostella vectensis] &gt;gi|156224377|gb|EDO45203.1| predicted protein [Nematostella vectensis]	NA	sp|Q54DU5|Y2028_DICDI/1e-17/von Willebrand factor A domain-containing protein DDB_G0292028 OS=Dictyostelium discoideum GN=DDB_G0292028 PE=4 SV=1	smm:Smp_073130.3/3e-14/vacuolar protein sorting 26 vps26; K18466 vacuolar protein sorting-associated protein 26	NA	PTHR10338/4.5E-29/--	NA
Unigene3518_All	2223	1.38	12.78	3.21115	1.55384e-53	6.40087e-52	Up	NA	NA	NA	NA	NA	PF00229/8.8E-6/TNF(Tumour Necrosis Factor) family	NA
CL1373.Contig2_All	803	0.31	2.87	3.21071	2.17136e-05	0.000122567	Up	NA	NA	NA	NA	NA	NA	NA
Unigene37221_All	270	1.33	12.31	3.21033	2.93276e-06	1.86472e-05	Up	NA	NA	NA	NA	NA	NA	NA
CL4838.Contig1_All	850	0.48	4.44	3.20945	6.76478e-08	5.11433e-07	Up	NA	NA	NA	NA	NA	NA	NA
Unigene32709_All	296	1.19	11	3.20847	2.93276e-06	1.86433e-05	Up	gi|556102159|gb|ESO90811.1|/3.04097e-06/hypothetical protein LOTGIDRAFT_122752, partial [Lottia gigantea]	NA	NA	NA	NA	NA	NA
Unigene34622_All	886	0.46	4.25	3.20776	6.76478e-08	5.11369e-07	Up	NA	NA	NA	NA	NA	NA	NA
Unigene18813_All	1811	3.24	29.92	3.20704	5.97916e-100	4.6289e-98	Up	gi|556113755|gb|ESP02407.1|/3.08835e-34/hypothetical protein LOTGIDRAFT_172065 [Lottia gigantea]	NA	sp|Q9Z2U4|ELF4_MOUSE/3e-17/ETS-related transcription factor Elf-4 OS=Mus musculus GN=Elf4 PE=2 SV=2	dre:387534/8e-17/elf2b, ef2, elf2, zef2; E74-like factor 2b (ets domain transcription factor); K09428 E74-like factor 1/2/4	NA	PF00178/2.7E-25/Ets-domain	NA
CL1613.Contig1_All	1154	0.31	2.86	3.20568	2.66202e-07	1.90124e-06	Up	gi|405963295|gb|EKC28882.1|/2.48267e-54/hypothetical protein CGI_10009228 [Crassostrea gigas]	NA	sp|Q54WY8|GACN_DICDI/3e-10/Rho GTPase-activating protein gacN OS=Dictyostelium discoideum GN=gacN PE=3 SV=1	hmg:100207631/1e-09/myosin-10-like; K10352 myosin heavy chain	PH0283/1e-09/---	NA	NA
Unigene40298_All	838	0.37	3.41	3.20417	2.93276e-06	1.86551e-05	Up	NA	gi|255098792|gb|FJ590509.1|/2e-14/Argopecten irradians manganese superoxide dismutase (MnSOD) gene, complete cds	NA	NA	NA	NA	NA
CL4802.Contig3_All	1381	0.77	7.09	3.20286	2.3281e-19	3.58354e-18	Up	gi|524906537|ref|XP_005108559.1|/1.00128e-47/PREDICTED: basement membrane-specific heparan sulfate proteoglycan core protein-like [Aplysia californica]	NA	sp|P13590|NCAM1_CHICK/9e-17/Neural cell adhesion molecule 1 OS=Gallus gallus GN=NCAM1 PE=1 SV=3	cmk:103177311/4e-28/B-cell receptor CD22-like; K06477 sialophorin; K06548 sialoadhesin	NA	SM00409/7.9E-5/Immunoglobulin	NA
Unigene43814_All	994	0.31	2.85	3.20062	2.93276e-06	1.86453e-05	Up	gi|556098067|gb|ESO86719.1|/3.4927e-136/hypothetical protein LOTGIDRAFT_128665 [Lottia gigantea]	gi|195592087|ref|XM_002085732.1|/3e-14/Drosophila simulans GD12130 (Dsim\GD12130), mRNA	sp|Q9NR19|ACSA_HUMAN/3e-110/Acetyl-coenzyme A synthetase, cytoplasmic OS=Homo sapiens GN=ACSS2 PE=1 SV=1	crg:105318496/1e-133/acetyl-coenzyme A synthetase, cytoplasmic-like; K01895 acetyl-CoA synthetase [EC:6.2.1.1]	BMEI0238/1e-74/---	PF00501/4.5E-41/AMP-binding enzyme	NA
Unigene46240_All	937	0.33	3.03	3.19878	2.93276e-06	1.86413e-05	Up	gi|358331514|dbj|GAA34256.2|/1.98377e-13/hypothetical protein CLF_104359 [Clonorchis sinensis]	NA	NA	NA	NA	NA	NA
Unigene41556_All	554	0.77	7.06	3.19674	6.76478e-08	5.11305e-07	Up	NA	NA	NA	NA	NA	NA	NA
Unigene34678_All	650	0.49	4.49	3.19586	2.93276e-06	1.86374e-05	Up	gi|291236304|ref|XP_002738080.1|/8.41398e-50/PREDICTED: E3 ubiquitin-protein ligase NRDP1-like [Saccoglossus kowalevskii]	NA	NA	bfo:BRAFLDRAFT_125681/2e-20/hypothetical protein; K11981 E3 ubiquitin-protein ligase NRDP1 [EC:2.3.2.27]	NA	NA	NA
Unigene3414_All	502	1.93	17.68	3.19545	3.21846e-16	4.25936e-15	Up	NA	NA	NA	NA	NA	NA	NA
Unigene31389_All	2006	0.68	6.22	3.19331	2.08466e-24	3.95227e-23	Up	gi|405973684|gb|EKC38381.1|/2.52084e-40/Calcium-regulated heat stable protein 1 [Crassostrea gigas]	NA	sp|Q9WU49|CHSP1_RAT/3e-28/Calcium-regulated heat stable protein 1 OS=Rattus norvegicus GN=Carhsp1 PE=1 SV=1	tsp:Tsp_04322/2e-23/tRNA-specific adenosine deaminase 2; K15441 tRNA-specific adenosine deaminase 2 [EC:3.5.4.-]	NA	PF00313/6.4E-7/'Cold-shock' DNA-binding domain	NA
Unigene31996_All	860	0.96	8.77	3.19147	1.29483e-14	1.56804e-13	Up	NA	NA	NA	NA	NA	NA	NA
CL3481.Contig1_All	1015	0.62	5.66	3.19046	2.14508e-11	2.14146e-10	Up	gi|556115911|gb|ESP04563.1|/5.40643e-116/hypothetical protein LOTGIDRAFT_237312 [Lottia gigantea]	NA	sp|Q91WA3|HDA11_MOUSE/1e-97/Histone deacetylase 11 OS=Mus musculus GN=Hdac11 PE=1 SV=1	crg:105322361/7e-117/histone deacetylase 11-like; K11418 histone deacetylase 11 [EC:3.5.1.98]	CC3648/1e-30/---	PTHR10625/3.9E-132/--	NA
Unigene6582_All	3365	3.41	31.1	3.18907	5.16318e-193	8.62551e-191	Up	gi|405975361|gb|EKC39927.1|/4.09922e-97/Eosinophil peroxidase [Crassostrea gigas]	NA	sp|P14650|PERT_RAT/2e-74/Thyroid peroxidase OS=Rattus norvegicus GN=Tpo PE=2 SV=1	api:100160088/2e-96/chorion peroxidase-like; K19511 peroxidase [EC:1.11.1.7]	NA	PF12248/2.9E-9/Farnesoic acid 0-methyl transferase	NA
CL1215.Contig2_All	1524	6.04	55.07	3.18865	3.45678e-152	4.31618e-150	Up	NA	NA	NA	NA	NA	NA	NA
CL2055.Contig1_All	1711	1.6	14.58	3.18785	1.12333e-46	3.93641e-45	Up	gi|405963698|gb|EKC29254.1|/5.52041e-94/hypothetical protein CGI_10027469 [Crassostrea gigas]	NA	NA	dre:100148193/7e-06/dnah6; dynein, axonemal, heavy chain 6; K10408 dynein heavy chain, axonemal	NA	PTHR10676/1.2E-22/--	NA
Unigene16371_All	1683	0.89	8.1	3.18604	4.62062e-26	9.3104e-25	Up	gi|405955326|gb|EKC22484.1|/1.43527e-54/von Willebrand factor D and EGF domain-containing protein [Crassostrea gigas]	NA	sp|Q8N2E2|VWDE_HUMAN/2e-18/von Willebrand factor D and EGF domain-containing protein OS=Homo sapiens GN=VWDE PE=2 SV=4	crg:105322503/3e-16/uncharacterized LOC105322503; K12855 pre-mRNA-processing factor 6	NA	PF00094/1.8E-9/von Willebrand factor type D domain	NA
Unigene4121_All	452	1.45	13.18	3.18423	3.8688e-11	3.79443e-10	Up	NA	NA	NA	NA	NA	NA	NA
CL4080.Contig1_All	1983	0.46	4.18	3.1838	1.78658e-16	2.38796e-15	Up	gi|405974501|gb|EKC39141.1|/1.50809e-154/Cisplatin resistance-associated overexpressed protein [Crassostrea gigas]	gi|330795611|ref|XM_003285818.1|/3e-06/Dictyostelium purpureum expressed protein, mRNA	sp|Q3SX41|LC7L3_BOVIN/3e-115/Luc7-like protein 3 OS=Bos taurus GN=LUC7L3 PE=2 SV=1	cmy:102941729/1e-64/LUC7L2; LUC7-like 2 (S. cerevisiae); K13212 RNA-binding protein Luc7-like 2	SPCC16A11.13/1e-24/---	PTHR12375:SF18/2.5E-134/--	biological_process:GO:0006376//mRNA splice site selection;cellular_component:GO:0005685//U1 snRNP;GO:0071004//U2-type prespliceosome;molecular_function:GO:0003729//mRNA binding;
CL356.Contig2_All	886	0.59	5.36	3.18345	1.60342e-09	1.39396e-08	Up	gi|556104089|gb|ESO92741.1|/8.8422e-61/hypothetical protein LOTGIDRAFT_190233 [Lottia gigantea]	gi|333449458|gb|JF919353.1|/3e-17/Crassostrea ariakensis clone Ca58 putative signal peptidase complex subunit SPC25 mRNA, complete cds	sp|Q5M8Y1|SPCS2_XENTR/6e-60/Probable signal peptidase complex subunit 2 OS=Xenopus tropicalis GN=spcs2 PE=2 SV=1	crg:105341192/1e-70/probable signal peptidase complex subunit 2; K12947 signal peptidase complex subunit 2 [EC:3.4.-.-]	NA	PF06703/1.0E-46/Microsomal signal peptidase 25 kDa subunit (SPC25)	NA
Unigene20366_All	2651	0.41	3.72	3.18161	2.02034e-19	3.12337e-18	Up	gi|405951511|gb|EKC19417.1|/8.90285e-52/hypothetical protein CGI_10008439 [Crassostrea gigas]	NA	NA	NA	NA	NA	NA
Unigene11399_All	1939	1.13	10.24	3.17982	1.85325e-37	5.2423e-36	Up	gi|556113138|gb|ESP01790.1|/2.88446e-118/hypothetical protein LOTGIDRAFT_200091, partial [Lottia gigantea]	gi|637317299|ref|XM_003222970.2|/9e-10/PREDICTED: Anolis carolinensis dipeptidase 2-like (LOC100567007), mRNA	sp|P31430|DPEP1_RAT/2e-88/Dipeptidase 1 OS=Rattus norvegicus GN=Dpep1 PE=2 SV=2	crg:105336177/6e-105/dipeptidase 1-like; K01273 membrane dipeptidase [EC:3.4.13.19]	SPAC3A11.10c/2e-64/---	PTHR10443:SF12/6.9E-189/--	NA
Unigene19429_All	3761	2.47	22.36	3.17834	3.70376e-155	4.71237e-153	Up	gi|405951327|gb|EKC19249.1|/1.26588e-86/Protein G7c [Crassostrea gigas]	NA	sp|Q9JHA8|VWA7_MOUSE/2e-52/von Willebrand factor A domain-containing protein 7 OS=Mus musculus GN=Vwa7 PE=2 SV=1	cbr:CBG16045/9e-26/Cbr-him-4; C. briggsae CBR-HIM-4 protein; K17341 hemicentin	NA	PTHR14905/1.3E-90/--	NA
CL878.Contig2_All	1832	0.38	3.44	3.17834	9.45288e-13	1.02533e-11	Up	gi|405950280|gb|EKC18277.1|/1.31733e-32/hypothetical protein CGI_10013876 [Crassostrea gigas]	NA	NA	crg:105342254/1e-13/uncharacterized LOC105342254; K11997 tripartite motif-containing protein 2/3	NA	NA	NA
Unigene19506_All	1730	1.73	15.63	3.17547	3.63362e-50	1.38782e-48	Up	gi|405978010|gb|EKC42428.1|/3.13651e-20/hypothetical protein CGI_10016341 [Crassostrea gigas]	NA	NA	NA	NA	NA	NA
Unigene44717_All	406	0.69	6.23	3.17456	2.17136e-05	0.000122555	Up	NA	NA	NA	NA	NA	NA	NA
CL482.Contig4_All	1697	0.73	6.59	3.17431	8.72748e-22	1.49062e-20	Up	NA	NA	NA	NA	NA	NA	NA
CL2167.Contig2_All	2701	5.86	52.9	3.1743	4.98824e-261	1.2431e-258	Up	gi|405957027|gb|EKC23265.1|/7.68875e-176/Heterogeneous nuclear ribonucleoprotein K [Crassostrea gigas]	NA	sp|Q5ZIQ3|HNRPK_CHICK/7e-80/Heterogeneous nuclear ribonucleoprotein K OS=Gallus gallus GN=HNRNPK PE=2 SV=1	crg:105346945/2e-176/heterogeneous nuclear ribonucleoprotein K-like; K12886 heterogeneous nuclear ribonucleoprotein K	XF0818/5e-23/---	PS50084/14.131/Type-1 KH domain profile.	NA
Unigene45362_All	787	0.39	3.52	3.17403	5.30672e-06	3.25838e-05	Up	gi|405971108|gb|EKC35963.1|/2.39699e-109/Inositol 1,4,5-trisphosphate receptor type 1 [Crassostrea gigas]	gi|524879309|ref|XM_005096275.1|/3e-35/PREDICTED: Aplysia californica inositol 1,4,5-trisphosphate receptor type 3-like (LOC101852918), mRNA	sp|Q9Z329|ITPR2_MOUSE/9e-30/Inositol 1,4,5-trisphosphate receptor type 2 OS=Mus musculus GN=Itpr2 PE=1 SV=4	crg:105331933/5e-110/inositol 1,4,5-trisphosphate receptor type 2-like; K04958 inositol 1,4,5-triphosphate receptor type 1	NA	PTHR13715/2.3E-59/--	NA
CL4681.Contig1_All	2529	1.7	15.29	3.16898	8.40516e-72	4.71972e-70	Up	gi|405967815|gb|EKC32942.1|/1.35952e-25/Poly [ADP-ribose] polymerase 14 [Crassostrea gigas]	NA	NA	crg:105347636/3e-26/poly [ADP-ribose] polymerase 14-like; K15261 poly [ADP-ribose] polymerase 10/14/15 [EC:2.4.2.30]	NA	PS50168/12.492/Death effector domain (DED) profile.	NA
Unigene16063_All	384	1.16	10.4	3.16439	1.22117e-07	9.001e-07	Up	NA	NA	NA	NA	NA	NA	NA
Unigene16921_All	399	1.11	9.95	3.16414	1.22117e-07	8.9999e-07	Up	NA	NA	NA	NA	NA	NA	NA
CL4134.Contig2_All	1386	1.65	14.77	3.16213	3.18966e-38	9.21274e-37	Up	NA	NA	NA	NA	NA	NA	NA
Unigene5009_All	579	0.55	4.91	3.15822	5.30672e-06	3.25937e-05	Up	NA	gi|348020200|gb|JN703459.1|/4e-06/Chlamys farreri clone BAC Bam040H03, complete sequence	NA	NA	NA	NA	NA
Unigene35725_All	958	0.32	2.85	3.15482	5.30672e-06	3.2597e-05	Up	NA	NA	NA	NA	NA	NA	NA
CL5013.Contig1_All	4945	0.53	4.71	3.15166	1.25423e-43	4.11982e-42	Up	gi|405963192|gb|EKC28789.1|/1.82201e-88/von Willebrand factor D and EGF domain-containing protein [Crassostrea gigas]	NA	sp|Q8N2E2|VWDE_HUMAN/3e-22/von Willebrand factor D and EGF domain-containing protein OS=Homo sapiens GN=VWDE PE=2 SV=4	crg:105322503/2e-31/uncharacterized LOC105322503; K12855 pre-mRNA-processing factor 6	NA	PS51233/18.527/VWFD domain profile.	NA
Unigene44898_All	1049	0.39	3.46	3.14923	1.22117e-07	8.9977e-07	Up	NA	NA	NA	NA	NA	NA	NA
CL5123.Contig2_All	1989	0.57	5.05	3.14725	1.12267e-19	1.75222e-18	Up	gi|405977541|gb|EKC41984.1|/1.90804e-40/hypothetical protein CGI_10028166 [Crassostrea gigas]	NA	NA	bfo:BRAFLDRAFT_124863/9e-08/hypothetical protein; K01968 3-methylcrotonyl-CoA carboxylase alpha subunit [EC:6.4.1.4]	NA	NA	NA
Unigene32119_All	1367	0.51	4.51	3.14456	3.05584e-12	3.20507e-11	Up	gi|405955209|gb|EKC22412.1|/3.78015e-15/hypothetical protein CGI_10002330 [Crassostrea gigas]	NA	NA	NA	NA	NA	NA
CL1576.Contig2_All	1592	1.19	10.52	3.1441	3.65592e-31	8.69405e-30	Up	gi|405964879|gb|EKC30321.1|/1.76974e-14/BTB and MATH domain-containing protein 38 [Crassostrea gigas]	NA	sp|Q20681|BAT38_CAEEL/1e-06/BTB and MATH domain-containing protein 38 OS=Caenorhabditis elegans GN=bath-38 PE=4 SV=1	NA	NA	PF00651/5.3E-13/BTB/POZ domain	NA
CL4358.Contig2_All	841	0.49	4.33	3.14351	2.19912e-07	1.57924e-06	Up	NA	NA	NA	NA	NA	NA	NA
Unigene38346_All	1858	0.48	4.24	3.14296	1.86897e-15	2.37143e-14	Up	gi|405963089|gb|EKC28693.1|/6.98908e-98/E3 ubiquitin-protein ligase MIB2 [Crassostrea gigas]	NA	sp|Q5ZIJ9|MIB2_CHICK/3e-71/E3 ubiquitin-protein ligase MIB2 OS=Gallus gallus GN=MIB2 PE=2 SV=1	crg:105329662/1e-98/E3 ubiquitin-protein ligase MIB1-like; K10645 E3 ubiquitin-protein ligase mind-bomb [EC:2.3.2.27]	all2748/9e-26/---	PTHR24202/4.3E-121/--	NA
Unigene32938_All	1096	0.35	3.09	3.14218	1.45229e-07	1.06292e-06	Up	NA	gi|597438749|emb|CU694210.18|/9e-27/Zebrafish DNA sequence from clone CH73-52D20 in linkage group 16, complete sequence	NA	NA	NA	NA	NA
CL3446.Contig2_All	2850	0.52	4.59	3.14191	9.57396e-26	1.90494e-24	Up	gi|405965398|gb|EKC30775.1|/0/Sorbin and SH3 domain-containing protein 1 [Crassostrea gigas]	gi|597767415|ref|XM_007247499.1|/5e-06/PREDICTED: Astyanax mexicanus sorbin and SH3 domain containing 2 (sorbs2), mRNA	sp|O60504|VINEX_HUMAN/2e-57/Vinexin OS=Homo sapiens GN=SORBS3 PE=1 SV=2	crg:105332198/5e-180/uncharacterized LOC105332198; K06086 sorbin and SH3 domain containing 1	NA	PTHR10661:SF66/3.1E-95/--	NA
CL1633.Contig1_All	718	1.02	9	3.14136	3.05584e-12	3.20451e-11	Up	NA	NA	NA	NA	NA	NA	NA
Unigene37230_All	1159	0.9	7.94	3.14114	1.44703e-17	2.03896e-16	Up	NA	NA	NA	NA	NA	NA	NA
CL2366.Contig2_All	583	0.55	4.85	3.14048	9.57268e-06	5.66489e-05	Up	NA	NA	NA	NA	NA	NA	NA
Unigene518_All	1025	2.78	24.5	3.13962	3.23802e-45	1.09954e-43	Up	NA	NA	NA	NA	NA	NA	NA
CL936.Contig2_All	991	1.12	9.86	3.13809	7.61174e-19	1.13964e-17	Up	gi|585660185|ref|XP_006816337.1|/8.04257e-32/PREDICTED: ribonuclease P protein subunit p21-like isoform X1 [Saccoglossus kowalevskii] &gt;gi|585660189|ref|XP_006816338.1| PREDICTED: ribonuclease P protein subunit p21-like isoform X2 [Saccoglossus kowalevskii]	NA	sp|Q8R040|RPP21_MOUSE/2e-23/Ribonuclease P protein subunit p21 OS=Mus musculus GN=Rpp21 PE=2 SV=2	spu:753068/8e-27/ribonuclease P protein subunit p21-like; K03540 ribonuclease P protein subunit RPR2 [EC:3.1.26.5]	PH1601/4e-11/---	PTHR14742:SF0/9.4E-34/--	NA
Unigene20449_All	2233	0.53	4.65	3.13317	5.28714e-20	8.36895e-19	Up	gi|405955091|gb|EKC22335.1|/1.69912e-125/Heat shock 70 kDa protein 12A [Crassostrea gigas]	NA	sp|O43301|HS12A_HUMAN/3e-76/Heat shock 70 kDa protein 12A OS=Homo sapiens GN=HSPA12A PE=1 SV=2	aqu:100633272/1e-34/uncharacterized LOC100633272; K10380 ankyrin	NA	PTHR14187/1.7E-117/--	NA
Unigene14532_All	1733	2.42	21.2	3.13099	1.1417e-66	5.91017e-65	Up	gi|405957146|gb|EKC23378.1|/3.19668e-139/Splicing factor, proline- and glutamine-rich [Crassostrea gigas]	NA	sp|Q8VIJ6|SFPQ_MOUSE/5e-111/Splicing factor, proline- and glutamine-rich OS=Mus musculus GN=Sfpq PE=1 SV=1	crg:105330115/6e-140/splicing factor, proline- and glutamine-rich-like; K13219 splicing factor, proline- and glutamine-rich	Cgl1939/1e-07/---	SM00360/2.6E-17/RNA recognition motif	biological_process:GO:0045892//negative regulation of transcription, DNA-templated;GO:0006397//mRNA processing;GO:0042754//negative regulation of circadian rhythm;GO:0006281//DNA repair;GO:0045876//positive regulation of sister chromatid cohesion;GO:0008380//RNA splicing;GO:0070932//histone H3 deacetylation;cellular_component:GO:0090575//RNA polymerase II transcription factor complex;GO:0042382//…
CL343.Contig2_All	13727	1.22	10.68	3.12996	3.52586e-268	9.16541e-266	Up	gi|405961925|gb|EKC27658.1|/0/Fibrocystin-L [Crassostrea gigas]	gi|584067142|ref|XM_006753915.1|/4e-07/PREDICTED: Myotis davidii polycystic kidney and hepatic disease 1 (autosomal recessive)-like 1 (PKHD1L1), mRNA	sp|Q86WI1|PKHL1_HUMAN/0.0/Fibrocystin-L OS=Homo sapiens GN=PKHD1L1 PE=2 SV=2	cmy:102942858/3e-33/CEMIP; cell migration inducing protein, hyaluronan binding; K19031 cell migration-inducing and hyaluronan-binding protein [EC:3.2.1.35]	CC1007/2e-08/---	PTHR11915:SF213/0.0/--	NA
Unigene39038_All	549	0.97	8.49	3.12971	5.19918e-09	4.33442e-08	Up	NA	NA	NA	NA	NA	NA	NA
Unigene43768_All	731	1.71	14.96	3.12904	5.28714e-20	8.37114e-19	Up	NA	NA	NA	NA	NA	NA	NA
Unigene37956_All	1356	0.37	3.23	3.12594	5.19918e-09	4.33502e-08	Up	gi|405965644|gb|EKC31006.1|/7.18278e-59/Cysteine-rich secretory protein LCCL domain-containing 2 [Crassostrea gigas]	NA	sp|Q7T141|PI15A_DANRE/1e-20/Peptidase inhibitor 15-A OS=Danio rerio GN=pi15a PE=3 SV=2	spu:574641/3e-13/probable G-protein coupled receptor 128; K10401 kinesin family member 18/19	YJL078c_1/1e-12/---	PR00837/8.1E-11/Allergen V5/Tpx-1 family signature	NA
Unigene33337_All	1102	0.46	4.01	3.1239	5.19918e-09	4.33382e-08	Up	NA	NA	NA	NA	NA	PS01180/10.369/CUB domain profile.	NA
CL498.Contig6_All	4881	0.27	2.35	3.12163	2.31446e-22	4.04347e-21	Up	gi|405958422|gb|EKC24552.1|/0/Focal adhesion kinase 1 [Crassostrea gigas]	gi|541952799|ref|XM_005432782.1|/1e-23/PREDICTED: Falco cherrug focal adhesion kinase 1-like (LOC102059158), transcript variant X2, mRNA	sp|Q91738|FAK1_XENLA/0.0/Focal adhesion kinase 1 OS=Xenopus laevis GN=ptk2 PE=2 SV=2	crg:105318395/0.0/focal adhesion kinase 1-like; K05725 focal adhesion kinase 1 [EC:2.7.10.2]	YAR019c/4e-23/---	SM00295/1.1E-30/Band 4.1 homologues	NA
CL1855.Contig1_All	1647	2.79	24.25	3.11965	5.3292e-72	3.00087e-70	Up	gi|405963369|gb|EKC28948.1|/9.47606e-120/hypothetical protein CGI_10012792 [Crassostrea gigas]	NA	sp|Q6B9X6|VWKA_DICDI/2e-13/Alpha-protein kinase vwkA OS=Dictyostelium discoideum GN=vwkA PE=1 SV=1	NA	NA	PTHR14187:SF37/7.3E-73/--	NA
Unigene44389_All	770	0.4	3.47	3.11686	9.57268e-06	5.66767e-05	Up	NA	NA	NA	NA	NA	NA	NA
CL1878.Contig3_All	1204	0.7	6.07	3.11627	2.33136e-14	2.77372e-13	Up	NA	NA	NA	NA	NA	NA	NA
Unigene46600_All	796	0.3	2.6	3.11548	7.30348e-05	0.00038	Up	NA	NA	NA	NA	NA	NA	NA
CL42.Contig2_All	4224	5.3	45.85	3.11286	0	0	Up	gi|405955467|gb|EKC22575.1|/4.46735e-88/ETS-related transcription factor Elf-5 [Crassostrea gigas]	NA	sp|Q32LN0|EHF_BOVIN/3e-21/ETS homologous factor OS=Bos taurus GN=EHF PE=2 SV=1	crg:105348386/2e-93/ETS-related transcription factor Elf-3-like; K17102 ETS homologous factor	NA	PR00454/2.28E-12/ETS domain signature	NA
CL2284.Contig1_All	975	0.42	3.63	3.11151	2.19912e-07	1.57886e-06	Up	gi|556112351|gb|ESP01003.1|/1.51729e-35/hypothetical protein LOTGIDRAFT_172839 [Lottia gigantea]	NA	sp|Q08BN9|NXPE3_DANRE/3e-13/NXPE family member 3 OS=Danio rerio GN=nxpe3 PE=2 SV=1	NA	NA	PTHR16165/8.4E-33/--	NA
Unigene36866_All	618	0.33	2.85	3.11042	0.000157744	0.000775767	Up	NA	NA	NA	NA	NA	NA	NA
Unigene32526_All	1260	0.56	4.83	3.10852	5.48208e-12	5.65538e-11	Up	NA	NA	NA	NA	NA	NA	NA
CL3397.Contig1_All	1456	2.53	21.8	3.10712	2.08766e-57	9.20341e-56	Up	gi|443690943|gb|ELT92936.1|/3.00928e-50/hypothetical protein CAPTEDRAFT_164759 [Capitella teleta]	gi|121047971|gb|EF148953.1|/1e-08/Chlamys farreri clone CFFD164 microsatellite sequence	sp|Q6P8Y1|CAPSL_MOUSE/2e-50/Calcyphosin-like protein OS=Mus musculus GN=Capsl PE=2 SV=4	mmu:80796/4e-10/Calm4, 2310037J09Rik, AI649108, DD112, Scarf; calmodulin 4; K02183 calmodulin	SPAC3A12.14/4e-07/---	PTHR10891:SF551/5.0E-64/--	NA
CL3962.Contig2_All	3615	0.28	2.41	3.10553	4.66676e-17	6.40517e-16	Up	gi|405952727|gb|EKC20505.1|/1.38762e-90/Cartilage matrix protein [Crassostrea gigas]	NA	sp|P98088|MUC5A_HUMAN/1e-27/Mucin-5AC (Fragments) OS=Homo sapiens GN=MUC5AC PE=1 SV=3	crg:105318714/1e-40/cartilage matrix protein-like; K05719 integrin beta 1; K06238 collagen, type VI, alpha	YPO2725/1e-19/---	PF00092/9.5E-36/von Willebrand factor type A domain	NA
Unigene35448_All	726	0.43	3.7	3.10512	9.57268e-06	5.66211e-05	Up	gi|405960320|gb|EKC26251.1|/8.27788e-74/hypothetical protein CGI_10024104 [Crassostrea gigas]	NA	NA	NA	NA	NA	NA
Unigene45587_All	512	0.63	5.42	3.10487	9.57268e-06	5.66267e-05	Up	NA	NA	NA	NA	NA	NA	NA
Unigene4845_All	1823	1.15	9.89	3.10434	2.4648e-33	6.2352e-32	Up	gi|524914675|ref|XP_005112149.1|/1.06822e-42/PREDICTED: uncharacterized protein LOC101853426 isoform X2 [Aplysia californica]	NA	NA	apla:101796599/6e-12/DHRS12; dehydrogenase/reductase (SDR family) member 12; K11168 dehydrogenase/reductase SDR family member 12 [EC:1.1.-.-]	NA	NA	NA
CL928.Contig2_All	1525	0.4	3.44	3.10434	2.2472e-10	2.07891e-09	Up	gi|156375560|ref|XP_001630148.1|/3.71747e-06/predicted protein [Nematostella vectensis] &gt;gi|156217163|gb|EDO38085.1| predicted protein [Nematostella vectensis]	NA	NA	NA	NA	NA	NA
Unigene45091_All	836	0.37	3.18	3.10343	9.57268e-06	5.66378e-05	Up	NA	NA	NA	NA	NA	NA	NA
CL4896.Contig2_All	1020	0.5	4.29	3.10098	9.33366e-09	7.62007e-08	Up	NA	NA	NA	NA	NA	NA	NA
CL4093.Contig1_All	600	1.06	9.09	3.10022	2.2472e-10	2.07859e-09	Up	NA	NA	NA	NA	NA	NA	NA
Unigene10001_All	804	1.16	9.94	3.09912	6.00282e-15	7.41081e-14	Up	gi|221123060|ref|XP_002155831.1|/3.87851e-17/PREDICTED: C-type mannose receptor 2-like, partial [Hydra vulgaris]	NA	sp|P20693|FCER2_MOUSE/2e-16/Low affinity immunoglobulin epsilon Fc receptor OS=Mus musculus GN=Fcer2 PE=2 SV=1	crg:105326000/5e-17/perlucin-like protein; K06468 Fc receptor, IgE, low affinity II	NA	PS50041/20.928/C-type lectin domain profile.	NA
Unigene38665_All	712	0.44	3.77	3.09899	9.57268e-06	5.66434e-05	Up	NA	NA	NA	NA	NA	NA	NA
Unigene40912_All	712	0.44	3.77	3.09899	9.57268e-06	5.66323e-05	Up	NA	gi|193734852|gb|EU623933.1|/2e-08/Argopecten irradians clone HWDD051 microsatellite sequence	NA	NA	NA	NA	NA
Unigene46905_All	1866	0.37	3.17	3.09889	9.81942e-12	9.98465e-11	Up	gi|524870156|ref|XP_005091864.1|/1.52855e-60/PREDICTED: membrane progestin receptor alpha-like isoform X1 [Aplysia californica] &gt;gi|524870158|ref|XP_005091865.1| PREDICTED: membrane progestin receptor alpha-like isoform X2 [Aplysia californica]	NA	sp|Q801G2|MPRAB_DANRE/5e-47/Membrane progestin receptor alpha-B OS=Danio rerio GN=paqr7b PE=1 SV=1	api:100160637/8e-12/ADIPOR-like receptor CG5315-like; K07297 adiponectin receptor	SPAC30D11.11/4e-14/---	PTHR20855/2.8E-68/--	NA
[truncated: 8,017 more rows]
